# Supplementary material for: Elucidating the anti-aging mechanism of Si Jun Zi Tang by integrating network pharmacology and experimental validation in vivo
Source: Aging (Albany NY). 2022 May 10;14(9):3941–55. doi: 10.18632/aging.204055 (PMC9134961; doi:10.18632/aging.204055)
Supplement: Supplementary Table 1 [file aging-14-204055-s001.xlsx]

## Sheet: Supplementary Table 1
Supplementary Table 1. 131 bioactive compounds met the ADME parameters from TCMSP.
MOL ID	Molecule Name	MW	Alogp	Hdon	Hacc	OB≥30%	Caco-2≥-0.4	BBB	DL≥0.18	HL
MOL002879	Diop	390.62	7.44	0	4	43.59	0.79	0.26	0.39	3.6
MOL000449	Stigmasterol	412.77	7.64	1	1	43.83	1.44	1	0.76	5.57
MOL000358	beta-sitosterol	414.79	8.08	1	1	36.91	1.32	0.99	0.75	5.36
MOL003648	Inermin	284.28	2.44	1	5	65.83	0.91	0.36	0.54	11.73
MOL000422	kaempferol	286.25	1.77	4	6	41.88	0.26	-0.55	0.24	14.74
MOL004492	Chrysanthemaxanthin	584.96	8.24	2	3	38.72	0.51	-0.98	0.58	17.47
MOL005308	Aposiopolamine	271.34	1.39	1	4	66.65	0.66	0.4	0.22	3.54
MOL005314	Celabenzine	379.55	2.29	2	5	101.88	0.77	0.05	0.49	8.15
MOL005317	Deoxyharringtonine	515.66	3.13	1	9	39.27	0.19	-0.25	0.81	7.9
MOL005318	Dianthramine	289.26	2.05	5	7	40.45	-0.23	-0.97	0.2	5.14
MOL005320	arachidonate	304.52	6.41	1	2	45.57	1.27	0.58	0.2	7.56
MOL005321	Frutinone A	264.24	2.7	0	4	65.9	0.89	0.46	0.34	19.1
MOL005348	Ginsenoside-Rh4_qt	458.8	5.59	3	3	31.11	0.5	-0.18	0.78	6.97
MOL005356	Girinimbin	263.36	4.6	1	1	61.22	1.72	1.22	0.31	8.17
MOL005357	Gomisin B	514.62	2.73	1	9	31.99	0.6	0.18	0.83	7.81
MOL005360	malkangunin	432.56	1.84	2	7	57.71	0.22	-0.17	0.63	4.09
MOL005376	Panaxadiol	460.82	5.46	2	3	33.09	0.82	0.23	0.79	6.34
MOL005384	suchilactone	368.41	3.73	0	6	57.52	0.82	0.28	0.56	9.03
MOL005399	alexandrin_qt	414.79	8.08	1	1	36.91	1.3	0.88	0.75	5.53
MOL005401	ginsenoside Rg5_qt	442.8	6.8	2	2	39.56	0.88	0.21	0.79	5.65
MOL000787	Fumarine	353.4	2.95	0	6	59.26	0.56	-0.13	0.83	23.46
MOL000020	12-senecioyl-2E,8E,10E-atractylentriol	312.39	2.5	0	4	62.4	0.01	-1.37	0.22	6.07
MOL000021	14-acetyl-12-senecioyl-2E,8E,10E-atractylentriol	355.44	3.21	0	5	60.31	0.33	-1.09	0.31	5.32
MOL000022	14-acetyl-12-senecioyl-2E,8Z,10E-atractylentriol	356.45	3.54	1	5	63.37	0.42	-1.14	0.3	6.43
MOL000028	α-Amyrin	426.8	7.35	1	1	39.51	1.42	1.28	0.76	3.83
MOL000033	(3S,8S,9S,10R,13R,14S,17R)-10,13-dimethyl-17-[(2R,5S)-5-propan-2-yloctan-2-yl]-2,3,4,7,8,9,11,12,14,15,16,17-dodecahydro-1H-cyclopenta[a]phenanthren-3-ol	428.82	8.54	1	1	36.23	1.45	1.09	0.78	5.22
MOL000049	3β-acetoxyatractylone	274.39	3.39	0	3	54.07	1.13	1.08	0.22	-1.31
MOL000072	8β-ethoxy atractylenolide Ⅲ	276.41	3.68	0	3	35.95	1.08	1.12	0.21	8.34
MOL000273	(2R)-2-[(3S,5R,10S,13R,14R,16R,17R)-3,16-dihydroxy-4,4,10,13,14-pentamethyl-2,3,5,6,12,15,16,17-octahydro-1H-cyclopenta[a]phenanthren-17-yl]-6-methylhept-5-enoic acid	470.76	5.41	3	4	30.93	0.01	-0.76	0.81	6.81
MOL000275	trametenolic acid	456.78	7.03	2	3	38.71	0.52	-0.14	0.8	7.78
MOL000276	7,9(11)-dehydropachymic acid	526.83	6.1	2	5	35.11	0.03	-0.87	0.81	7.34
MOL000279	Cerevisterol	430.74	5.15	3	3	37.96	0.28	-0.39	0.77	5.31
MOL000280	(2R)-2-[(3S,5R,10S,13R,14R,16R,17R)-3,16-dihydroxy-4,4,10,13,14-pentamethyl-2,3,5,6,12,15,16,17-octahydro-1H-cyclopenta[a]phenanthren-17-yl]-5-isopropyl-hex-5-enoic acid	484.79	5.72	3	4	31.07	0.05	-0.7	0.82	7.42
MOL000282	ergosta-7,22E-dien-3beta-ol	398.74	7.18	1	1	43.51	1.32	0.91	0.72	5.11
MOL000283	Ergosterol peroxide	430.74	7.17	1	3	40.36	0.84	0.34	0.81	3.43
MOL000285	(2R)-2-[(5R,10S,13R,14R,16R,17R)-16-hydroxy-3-keto-4,4,10,13,14-pentamethyl-1,2,5,6,12,15,16,17-octahydrocyclopenta[a]phenanthren-17-yl]-5-isopropyl-hex-5-enoic acid	482.77	5.68	2	4	38.26	0.12	-0.57	0.82	6.77
MOL000287	3beta-Hydroxy-24-methylene-8-lanostene-21-oic acid	470.81	7.33	2	3	38.7	0.61	-0.04	0.81	6.59
MOL000289	pachymic acid	528.85	6.54	2	5	33.63	0.1	-0.57	0.81	9.27
MOL000290	Poricoic acid A	498.77	5.94	3	5	30.61	-0.14	-0.93	0.76	8.26
MOL000291	Poricoic acid B	484.74	5.64	3	5	30.52	-0.08	-0.87	0.75	8.67
MOL000292	poricoic acid C	482.77	7.11	2	4	38.15	0.32	-0.41	0.75	7.73
MOL000296	hederagenin	414.79	8.08	1	1	36.91	1.32	0.96	0.75	5.35
MOL000300	dehydroeburicoic acid	453.75	6.35	1	3	44.17	0.38	-0.16	0.83	7.04
MOL001484	Inermine	284.28	2.44	1	5	75.18	0.89	0.4	0.54	11.72
MOL001792	DFV	256.27	2.57	2	4	32.76	0.51	-0.29	0.18	17.89
MOL000211	Mairin	456.78	6.52	2	3	55.38	0.73	0.22	0.78	8.87
MOL002311	Glycyrol	366.39	4.85	2	6	90.78	0.71	-0.2	0.67	9.85
MOL000239	Jaranol	314.31	2.09	2	6	50.83	0.61	-0.22	0.29	15.5
MOL002565	Medicarpin	270.3	2.66	1	4	49.22	1	0.53	0.34	8.46
MOL000354	isorhamnetin	316.28	1.76	4	7	49.6	0.31	-0.54	0.31	14.34
MOL000359	sitosterol	414.79	8.08	1	1	36.91	1.32	0.87	0.75	5.37
MOL003656	Lupiwighteone	338.38	3.92	3	5	51.64	0.68	-0.23	0.37	15.63
MOL003896	7-Methoxy-2-methyl isoflavone	266.31	3.36	0	3	42.56	1.16	0.56	0.2	16.89
MOL000392	formononetin	268.28	2.58	1	4	69.67	0.78	0.02	0.21	17.04
MOL000417	Calycosin	284.28	2.32	2	5	47.75	0.52	-0.43	0.24	17.1
MOL000422	kaempferol	286.25	1.77	4	6	41.88	0.26	-0.55	0.24	14.74
MOL004328	naringenin	272.27	2.3	3	5	59.29	0.28	-0.37	0.21	16.98
MOL004805	(2S)-2-[4-hydroxy-3-(3-methylbut-2-enyl)phenyl]-8,8-dimethyl-2,3-dihydropyrano[2,3-f]chromen-4-one	390.51	5.48	1	4	31.79	1	0.25	0.72	14.82
MOL004806	euchrenone	406.56	6.35	1	4	30.29	1.09	0.39	0.57	15.89
MOL004808	glyasperin B	370.43	4.02	3	6	65.22	0.47	-0.09	0.44	16.1
MOL004810	glyasperin F	354.38	2.97	3	6	75.84	0.43	-0.15	0.54	15.64
MOL004811	Glyasperin C	356.45	4.73	3	5	45.56	0.71	0.07	0.4	3.13
MOL004814	Isotrifoliol	298.26	2.99	2	6	31.94	0.53	-0.25	0.42	7.91
MOL004815	(E)-1-(2,4-dihydroxyphenyl)-3-(2,2-dimethylchromen-6-yl)prop-2-en-1-one	322.38	3.96	2	4	39.62	0.66	-0.12	0.35	16.16
MOL004820	kanzonols W	336.36	3.63	2	5	50.48	0.63	0.04	0.52	0.15
MOL004824	(2S)-6-(2,4-dihydroxyphenyl)-2-(2-hydroxypropan-2-yl)-4-methoxy-2,3-dihydrofuro[3,2-g]chromen-7-one	384.41	2.96	3	7	60.25	0	-0.76	0.63	4.31
MOL004827	Semilicoisoflavone B	352.36	2.85	3	6	48.78	0.45	-0.33	0.55	17.02
MOL004828	Glepidotin A	338.38	3.9	3	5	44.72	0.79	0.06	0.35	16.09
MOL004829	Glepidotin B	340.4	3.88	3	5	64.46	0.46	-0.09	0.34	15.98
MOL004833	Phaseolinisoflavan	324.4	3.95	2	4	32.01	1.01	0.46	0.45	2.66
MOL004835	Glypallichalcone	284.33	3.4	1	4	61.6	0.76	0.23	0.19	17.01
MOL004838	8-(6-hydroxy-2-benzofuranyl)-2,2-dimethyl-5-chromenol	308.35	4.2	2	4	58.44	1	0.34	0.38	8.71
MOL004841	Licochalcone B	286.3	2.88	3	5	76.76	0.47	-0.46	0.19	17.02
MOL004848	licochalcone G	354.43	4.35	3	5	49.25	0.64	-0.04	0.32	15.75
MOL004849	3-(2,4-dihydroxyphenyl)-8-(1,1-dimethylprop-2-enyl)-7-hydroxy-5-methoxy-coumarin	368.41	4.03	3	6	59.62	0.4	-0.23	0.43	0.69
MOL004855	Licoricone	382.44	4.16	2	6	63.58	0.53	-0.14	0.47	16.37
MOL004856	Gancaonin A	352.41	4.17	2	5	51.08	0.8	0.13	0.4	16.82
MOL004857	Gancaonin B	368.41	3.91	3	6	48.79	0.58	-0.1	0.45	16.49
MOL004863	3-(3,4-dihydroxyphenyl)-5,7-dihydroxy-8-(3-methylbut-2-enyl)chromone	354.38	3.65	4	6	66.37	0.52	-0.13	0.41	15.81
MOL004864	5,7-dihydroxy-3-(4-methoxyphenyl)-8-(3-methylbut-2-enyl)chromone	352.41	4.17	2	5	30.49	0.9	0.21	0.41	14.99
MOL004866	2-(3,4-dihydroxyphenyl)-5,7-dihydroxy-6-(3-methylbut-2-enyl)chromone	354.38	3.92	4	6	44.15	0.48	-0.28	0.41	16.77
MOL004879	Glycyrin	382.44	4.67	2	6	52.61	0.59	-0.13	0.47	1.31
MOL004882	Licocoumarone	340.4	4.98	3	5	33.21	0.84	0.06	0.36	9.66
MOL004883	Licoisoflavone	354.38	3.65	4	6	41.61	0.37	-0.27	0.42	16.09
MOL004884	Licoisoflavone B	352.36	2.85	3	6	38.93	0.46	-0.18	0.55	15.73
MOL004885	licoisoflavanone	354.38	2.97	3	6	52.47	0.39	-0.22	0.54	15.67
MOL004891	shinpterocarpin	322.38	3.46	1	4	80.3	1.1	0.68	0.73	6.5
MOL004898	(E)-3-[3,4-dihydroxy-5-(3-methylbut-2-enyl)phenyl]-1-(2,4-dihydroxyphenyl)prop-2-en-1-one	340.4	4.49	4	5	46.27	0.41	-0.4	0.31	15.24
MOL004904	licopyranocoumarin	384.41	3.04	3	7	80.36	0.13	-0.62	0.65	0.08
MOL004905	3,22-Dihydroxy-11-oxo-delta(12)-oleanene-27-alpha-methoxycarbonyl-29-oic acid	512.75	4.37	1	6	34.32	-0.06	-0.75	0.55	3.56
MOL004907	Glyzaglabrin	298.26	2.1	2	6	61.07	0.34	-0.2	0.35	21.2
MOL004908	Glabridin	324.4	3.95	2	4	53.25	0.97	0.36	0.47	0.03
MOL004910	Glabranin	324.4	4.42	2	4	52.9	0.97	0.31	0.31	16.24
MOL004911	Glabrene	322.38	3.77	2	4	46.27	0.99	0.04	0.44	3.63
MOL004912	Glabrone	336.36	3.12	2	5	52.51	0.59	-0.11	0.5	16.09
MOL004913	1,3-dihydroxy-9-methoxy-6-benzofurano[3,2-c]chromenone	298.26	2.99	2	6	48.14	0.48	-0.19	0.43	8.87
MOL004914	1,3-dihydroxy-8,9-dimethoxy-6-benzofurano[3,2-c]chromenone	328.29	2.98	2	7	62.9	0.4	-0.34	0.53	9.32
MOL004915	Eurycarpin A	338.38	3.92	3	5	43.28	0.43	-0.06	0.37	17.1
MOL004935	Sigmoidin-B	356.4	3.89	4	6	34.88	0.42	-0.41	0.41	14.49
MOL004941	(2R)-7-hydroxy-2-(4-hydroxyphenyl)chroman-4-one	256.27	2.57	2	4	71.12	0.41	-0.25	0.18	18.09
MOL004945	(2S)-7-hydroxy-2-(4-hydroxyphenyl)-8-(3-methylbut-2-enyl)chroman-4-one	324.4	4.42	2	4	36.57	0.72	-0.04	0.32	17.95
MOL004948	Isoglycyrol	366.39	4.36	1	6	44.7	0.91	0.05	0.84	6.69
MOL004949	Isolicoflavonol	354.38	3.63	4	6	45.17	0.54	-0.42	0.42	15.55
MOL004957	HMO	268.28	2.58	1	4	38.37	0.79	0.25	0.21	16.56
MOL004959	1-Methoxyphaseollidin	354.43	4.25	2	5	69.98	1.01	0.48	0.64	9.53
MOL004961	Quercetin der.	330.31	1.82	3	7	46.45	0.39	-0.44	0.33	16.61
MOL004966	3'-Hydroxy-4'-O-Methylglabridin	354.43	3.93	2	5	43.71	1	0.73	0.57	-0.61
MOL000497	licochalcone a	338.43	4.62	2	4	40.79	0.82	-0.21	0.29	16.2
MOL004974	3'-Methoxyglabridin	354.43	3.93	2	5	46.16	0.94	0.47	0.57	0.52
MOL004978	2-[(3R)-8,8-dimethyl-3,4-dihydro-2H-pyrano[6,5-f]chromen-3-yl]-5-methoxyphenol	338.43	4.2	1	4	36.21	1.12	0.61	0.52	-0.13
MOL004980	Inflacoumarin A	322.38	4.7	2	4	39.71	0.73	-0.24	0.33	2.31
MOL004985	icos-5-enoic acid	310.58	7.75	1	2	30.7	1.22	1.09	0.2	5.28
MOL004988	Kanzonol F	420.54	5.3	1	5	32.47	1.18	0.56	0.89	9.98
MOL004989	6-prenylated eriodictyol	356.4	3.89	4	6	39.22	0.4	-0.29	0.41	16.52
MOL004990	7,2',4'-trihydroxy－5-methoxy-3－arylcoumarin	300.28	2.56	3	6	83.71	0.24	-0.59	0.27	0.99
MOL004991	7-Acetoxy-2-methylisoflavone	294.32	3.15	0	4	38.92	0.74	0.16	0.26	17.49
MOL004993	8-prenylated eriodictyol	356.4	3.89	4	6	53.79	0.43	-0.44	0.4	15.7
MOL004996	gadelaidic acid	310.58	7.75	1	2	30.7	1.2	0.94	0.2	5.25
MOL000500	Vestitol	272.32	3.15	2	4	74.66	0.86	0.3	0.21	3
MOL005000	Gancaonin G	352.41	4.17	2	5	60.44	0.78	0.23	0.39	16.13
MOL005001	Gancaonin H	420.49	4.71	3	6	50.1	0.6	-0.14	0.78	16.64
MOL005003	Licoagrocarpin	338.43	4.51	1	4	58.81	1.23	0.61	0.58	9.45
MOL005007	Glyasperins M	368.41	3.22	2	6	72.67	0.49	-0.04	0.59	15.57
MOL005008	Glycyrrhiza flavonol A	370.38	2.17	4	7	41.28	-0.09	-0.81	0.6	13.71
MOL005012	Licoagroisoflavone	336.36	3.48	2	5	57.28	0.71	0.09	0.49	19.64
MOL005013	18α-hydroxyglycyrrhetic acid	486.76	4.55	3	5	41.16	-0.29	-0.78	0.71	4.96
MOL005016	Odoratin	314.31	2.3	2	6	49.95	0.42	-0.24	0.3	16.35
MOL005017	Phaseol	336.36	4.87	2	5	78.77	0.76	-0.06	0.58	9.64
MOL005018	Xambioona	388.49	4.68	0	4	54.85	1.09	0.52	0.87	14.5
MOL005020	dehydroglyasperins C	340.4	4.3	4	5	53.82	0.68	-0.12	0.37	2.75
MOL000098	quercetin	302.25	1.5	5	7	46.43	0.05	-0.77	0.28	14.4
