# Supplementary material for: Elucidating the anti-aging mechanism of Si Jun Zi Tang by integrating network pharmacology and experimental validation in vivo
Source: Aging (Albany NY). 2022 May 10;14(9):3941–55. doi: 10.18632/aging.204055 (PMC9134961; doi:10.18632/aging.204055)
Supplement: Supplementary Table 2 [file aging-14-204055-s002.xlsx]

## Sheet: Supplementary Table2
Supplementary Table 2. Target names converted into symbols of corresponding genes using UniProt database.
Ingredients of SJZT	MOLID	Bioactive components	Target name	Genesymbol
Panax ginseng C. A. Meyer	MOL002879	Diop	Sodium channel protein type 5 subunit alpha	SCN5A
Panax ginseng C. A. Meyer	MOL002879	Diop	Beta-2 adrenergic receptor	ADRB2
Panax ginseng C. A. Meyer	MOL002879	Diop	Muscarinic acetylcholine receptor M3	CHRM3
Panax ginseng C. A. Meyer	MOL000449	Stigmasterol	Progesterone receptor	PGR
Panax ginseng C. A. Meyer	MOL000449	Stigmasterol	Mineralocorticoid receptor	NR3C2
Panax ginseng C. A. Meyer	MOL000449	Stigmasterol	Nuclear receptor coactivator 2	NCOA2
Panax ginseng C. A. Meyer	MOL000449	Stigmasterol	Alcohol dehydrogenase 1C	ADH1C
Panax ginseng C. A. Meyer	MOL000449	Stigmasterol	Ig gamma-1 chain C region	Ighg1
Panax ginseng C. A. Meyer	MOL000449	Stigmasterol	Retinoic acid receptor RXR-alpha	RXRA
Panax ginseng C. A. Meyer	MOL000449	Stigmasterol	Nuclear receptor coactivator 1	NCOA1
Panax ginseng C. A. Meyer	MOL000449	Stigmasterol	Prostaglandin G/H synthase 1	PTGS1
Panax ginseng C. A. Meyer	MOL000449	Stigmasterol	Prostaglandin G/H synthase 2	PTGS2
Panax ginseng C. A. Meyer	MOL000449	Stigmasterol	Alpha-2A adrenergic receptor	ADRA2A
Panax ginseng C. A. Meyer	MOL000449	Stigmasterol	Sodium-dependent noradrenaline transporter	SLC6A2
Panax ginseng C. A. Meyer	MOL000449	Stigmasterol	Sodium-dependent dopamine transporter	SLC6A3
Panax ginseng C. A. Meyer	MOL000449	Stigmasterol	Beta-2 adrenergic receptor	ADRB2
Panax ginseng C. A. Meyer	MOL000449	Stigmasterol	Aldose reductase	AKR1B1
Panax ginseng C. A. Meyer	MOL000449	Stigmasterol	Urokinase-type plasminogen activator	PLAU
Panax ginseng C. A. Meyer	MOL000449	Stigmasterol	Leukotriene A-4 hydrolase	LTA4H
Panax ginseng C. A. Meyer	MOL000449	Stigmasterol	Amine oxidase [flavin-containing] B	MAOB
Panax ginseng C. A. Meyer	MOL000449	Stigmasterol	Amine oxidase [flavin-containing] A	MAOA
Panax ginseng C. A. Meyer	MOL000449	Stigmasterol	mRNA of PKA Catalytic Subunit C-alpha	PKACA
Panax ginseng C. A. Meyer	MOL000449	Stigmasterol	Chymotrypsinogen B	CTRB1
Panax ginseng C. A. Meyer	MOL000449	Stigmasterol	Muscarinic acetylcholine receptor M3	CHRM3
Panax ginseng C. A. Meyer	MOL000449	Stigmasterol	Muscarinic acetylcholine receptor M1	CHRM1
Panax ginseng C. A. Meyer	MOL000449	Stigmasterol	Beta-1 adrenergic receptor	ADRB1
Panax ginseng C. A. Meyer	MOL000449	Stigmasterol	Sodium channel protein type 5 subunit alpha	SCN5A
Panax ginseng C. A. Meyer	MOL000449	Stigmasterol	5-hydroxytryptamine 2A receptor	HTR2A
Panax ginseng C. A. Meyer	MOL000449	Stigmasterol	Alpha-1A adrenergic receptor	ADRA1A
Panax ginseng C. A. Meyer	MOL000449	Stigmasterol	Gamma-aminobutyric-acid receptor alpha-3 subunit	GABRA3
Panax ginseng C. A. Meyer	MOL000449	Stigmasterol	Muscarinic acetylcholine receptor M2	CHRM2
Panax ginseng C. A. Meyer	MOL000449	Stigmasterol	Alpha-1B adrenergic receptor	ADRA1B
Panax ginseng C. A. Meyer	MOL000449	Stigmasterol	Gamma-aminobutyric acid receptor subunit alpha-1	GABRA1
Panax ginseng C. A. Meyer	MOL000449	Stigmasterol	Neuronal acetylcholine receptor protein, alpha-7 chain	CHRNA7
Panax ginseng C. A. Meyer	MOL000358	beta-sitosterol	Progesterone receptor	PGR
Panax ginseng C. A. Meyer	MOL000358	beta-sitosterol	Nuclear receptor coactivator 2	NCOA2
Panax ginseng C. A. Meyer	MOL000358	beta-sitosterol	Prostaglandin G/H synthase 1	PTGS1
Panax ginseng C. A. Meyer	MOL000358	beta-sitosterol	Prostaglandin G/H synthase 2	PTGS2
Panax ginseng C. A. Meyer	MOL000358	beta-sitosterol	Heat shock protein HSP 90	HSP90
Panax ginseng C. A. Meyer	MOL000358	beta-sitosterol	Phosphatidylinositol-4,5-bisphosphate 3-kinase catalytic subunit, gamma isoform	PIK3CG
Panax ginseng C. A. Meyer	MOL000358	beta-sitosterol	Potassium voltage-gated channel subfamily H member 2	KCNH2
Panax ginseng C. A. Meyer	MOL000358	beta-sitosterol	mRNA of PKA Catalytic Subunit C-alpha	PKACA
Panax ginseng C. A. Meyer	MOL000358	beta-sitosterol	Dopamine D1 receptor	DRD1
Panax ginseng C. A. Meyer	MOL000358	beta-sitosterol	Muscarinic acetylcholine receptor M3	CHRM3
Panax ginseng C. A. Meyer	MOL000358	beta-sitosterol	Muscarinic acetylcholine receptor M1	CHRM1
Panax ginseng C. A. Meyer	MOL000358	beta-sitosterol	Sodium channel protein type 5 subunit alpha	SCN5A
Panax ginseng C. A. Meyer	MOL000358	beta-sitosterol	Gamma-aminobutyric-acid receptor alpha-2 subunit	GABRA2
Panax ginseng C. A. Meyer	MOL000358	beta-sitosterol	Muscarinic acetylcholine receptor M4	CHRM4
Panax ginseng C. A. Meyer	MOL000358	beta-sitosterol	CGMP-inhibited 3',5'-cyclic phosphodiesterase A	PDE3A
Panax ginseng C. A. Meyer	MOL000358	beta-sitosterol	5-hydroxytryptamine 2A receptor	HTR2A
Panax ginseng C. A. Meyer	MOL000358	beta-sitosterol	Gamma-aminobutyric-acid receptor alpha-5 subunit	GABRA5
Panax ginseng C. A. Meyer	MOL000358	beta-sitosterol	Alpha-1A adrenergic receptor	ADRA1A
Panax ginseng C. A. Meyer	MOL000358	beta-sitosterol	Gamma-aminobutyric-acid receptor alpha-3 subunit	GABRA3
Panax ginseng C. A. Meyer	MOL000358	beta-sitosterol	Muscarinic acetylcholine receptor M2	CHRM2
Panax ginseng C. A. Meyer	MOL000358	beta-sitosterol	Alpha-1B adrenergic receptor	ADRA1B
Panax ginseng C. A. Meyer	MOL000358	beta-sitosterol	Beta-2 adrenergic receptor	ADRB2
Panax ginseng C. A. Meyer	MOL000358	beta-sitosterol	Neuronal acetylcholine receptor subunit alpha-2	CHRNA2
Panax ginseng C. A. Meyer	MOL000358	beta-sitosterol	Sodium-dependent serotonin transporter	SLC6A4
Panax ginseng C. A. Meyer	MOL000358	beta-sitosterol	Mu-type opioid receptor	OPRM1
Panax ginseng C. A. Meyer	MOL000358	beta-sitosterol	Gamma-aminobutyric acid receptor subunit alpha-1	GABRA1
Panax ginseng C. A. Meyer	MOL000358	beta-sitosterol	Neuronal acetylcholine receptor protein, alpha-7 chain	CHRNA7
Panax ginseng C. A. Meyer	MOL000358	beta-sitosterol	Cytochrome P450-cam	CYP450
Panax ginseng C. A. Meyer	MOL000358	beta-sitosterol	Apoptosis regulator Bcl-2	BCL2
Panax ginseng C. A. Meyer	MOL000358	beta-sitosterol	Apoptosis regulator BAX	BAX
Panax ginseng C. A. Meyer	MOL000358	beta-sitosterol	Caspase-9	CASP9
Panax ginseng C. A. Meyer	MOL000358	beta-sitosterol	Transcription factor AP-1	JUN
Panax ginseng C. A. Meyer	MOL000358	beta-sitosterol	Caspase-3	CASP3
Panax ginseng C. A. Meyer	MOL000358	beta-sitosterol	Caspase-8	CASP8
Panax ginseng C. A. Meyer	MOL000358	beta-sitosterol	Protein kinase C alpha type	PRKCA
Panax ginseng C. A. Meyer	MOL000358	beta-sitosterol	Transforming growth factor beta-1	TGFB1
Panax ginseng C. A. Meyer	MOL000358	beta-sitosterol	Serum paraoxonase/arylesterase 1	PON1
Panax ginseng C. A. Meyer	MOL000358	beta-sitosterol	Microtubule-associated protein 2	MAP2
Panax ginseng C. A. Meyer	MOL003648	Inermin	Prostaglandin G/H synthase 1	PTGS1
Panax ginseng C. A. Meyer	MOL003648	Inermin	Muscarinic acetylcholine receptor M3	CHRM3
Panax ginseng C. A. Meyer	MOL003648	Inermin	Sodium channel protein type 5 subunit alpha	SCN5A
Panax ginseng C. A. Meyer	MOL003648	Inermin	Prostaglandin G/H synthase 2	PTGS2
Panax ginseng C. A. Meyer	MOL003648	Inermin	5-hydroxytryptamine receptor 3A	HTR3A
Panax ginseng C. A. Meyer	MOL003648	Inermin	Retinoic acid receptor RXR-alpha	RXRA
Panax ginseng C. A. Meyer	MOL003648	Inermin	Alpha-1B adrenergic receptor	ADRA1B
Panax ginseng C. A. Meyer	MOL003648	Inermin	Beta-2 adrenergic receptor	ADRB2
Panax ginseng C. A. Meyer	MOL003648	Inermin	Alpha-1D adrenergic receptor	ADRA1D
Panax ginseng C. A. Meyer	MOL003648	Inermin	Sodium-dependent serotonin transporter	SLC6A4
Panax ginseng C. A. Meyer	MOL003648	Inermin	Heat shock protein HSP 90	HSP90
Panax ginseng C. A. Meyer	MOL003648	Inermin	Phosphatidylinositol-4,5-bisphosphate 3-kinase catalytic subunit, gamma isoform	PIK3CG
Panax ginseng C. A. Meyer	MOL003648	Inermin	Neuronal acetylcholine receptor protein, alpha-7 chain	CHRNA7
Panax ginseng C. A. Meyer	MOL003648	Inermin	mRNA of PKA Catalytic Subunit C-alpha	PKACA
Panax ginseng C. A. Meyer	MOL003648	Inermin	Ig gamma-1 chain C region	Ighg1
Panax ginseng C. A. Meyer	MOL003648	Inermin	Trypsin-1	PRSS1
Panax ginseng C. A. Meyer	MOL003648	Inermin	Nuclear receptor coactivator 1	NCOA1
Panax ginseng C. A. Meyer	MOL003648	Inermin	Calmodulin	CaM
Panax ginseng C. A. Meyer	MOL000422	kaempferol	Nitric oxide synthase, inducible	NOS2
Panax ginseng C. A. Meyer	MOL000422	kaempferol	Prostaglandin G/H synthase 1	PTGS1
Panax ginseng C. A. Meyer	MOL000422	kaempferol	Androgen receptor	AR
Panax ginseng C. A. Meyer	MOL000422	kaempferol	Peroxisome proliferator activated receptor gamma	PPARG
Panax ginseng C. A. Meyer	MOL000422	kaempferol	Prostaglandin G/H synthase 2	PTGS2
Panax ginseng C. A. Meyer	MOL000422	kaempferol	Heat shock protein HSP 90	HSP90
Panax ginseng C. A. Meyer	MOL000422	kaempferol	Phosphatidylinositol-4,5-bisphosphate 3-kinase catalytic subunit, gamma isoform	PIK3CG
Panax ginseng C. A. Meyer	MOL000422	kaempferol	mRNA of PKA Catalytic Subunit C-alpha	PKACA
Panax ginseng C. A. Meyer	MOL000422	kaempferol	Nuclear receptor coactivator 2	NCOA2
Panax ginseng C. A. Meyer	MOL000422	kaempferol	Dipeptidyl peptidase IV	DPP4
Panax ginseng C. A. Meyer	MOL000422	kaempferol	Trypsin-1	PRSS1
Panax ginseng C. A. Meyer	MOL000422	kaempferol	Progesterone receptor	PGR
Panax ginseng C. A. Meyer	MOL000422	kaempferol	Thrombin	Thrombin
Panax ginseng C. A. Meyer	MOL000422	kaempferol	Muscarinic acetylcholine receptor M1	CHRM1
Panax ginseng C. A. Meyer	MOL000422	kaempferol	Nitric-oxide synthase, endothelial	NOS3
Panax ginseng C. A. Meyer	MOL000422	kaempferol	Gamma-aminobutyric-acid receptor alpha-2 subunit	GABRA2
Panax ginseng C. A. Meyer	MOL000422	kaempferol	Acetylcholinesterase	ACHE
Panax ginseng C. A. Meyer	MOL000422	kaempferol	Sodium-dependent noradrenaline transporter	SLC6A2
Panax ginseng C. A. Meyer	MOL000422	kaempferol	Muscarinic acetylcholine receptor M2	CHRM2
Panax ginseng C. A. Meyer	MOL000422	kaempferol	Alpha-1B adrenergic receptor	ADRA1B
Panax ginseng C. A. Meyer	MOL000422	kaempferol	Gamma-aminobutyric acid receptor subunit alpha-1	GABRA1
Panax ginseng C. A. Meyer	MOL000422	kaempferol	DNA topoisomerase II	TOP2
Panax ginseng C. A. Meyer	MOL000422	kaempferol	Coagulation factor VII	F7
Panax ginseng C. A. Meyer	MOL000422	kaempferol	Calmodulin	CaM
Panax ginseng C. A. Meyer	MOL000422	kaempferol	Transcription factor p65	RELA
Panax ginseng C. A. Meyer	MOL000422	kaempferol	Inhibitor of nuclear factor kappa-B kinase subunit beta	IKBKB
Panax ginseng C. A. Meyer	MOL000422	kaempferol	RAC-alpha serine/threonine-protein kinase	AKT1
Panax ginseng C. A. Meyer	MOL000422	kaempferol	Apoptosis regulator Bcl-2	BCL2
Panax ginseng C. A. Meyer	MOL000422	kaempferol	Apoptosis regulator BAX	BAX
Panax ginseng C. A. Meyer	MOL000422	kaempferol	Tumor necrosis factor	TNF
Panax ginseng C. A. Meyer	MOL000422	kaempferol	Transcription factor AP-1	JUN
Panax ginseng C. A. Meyer	MOL000422	kaempferol	Activator of 90 kDa heat shock protein ATPase homolog 1	AHSA1
Panax ginseng C. A. Meyer	MOL000422	kaempferol	Caspase-3	CASP3
Panax ginseng C. A. Meyer	MOL000422	kaempferol	Mitogen-activated protein kinase 8	MAPK8
Panax ginseng C. A. Meyer	MOL000422	kaempferol	Xanthine dehydrogenase/oxidase	XDH
Panax ginseng C. A. Meyer	MOL000422	kaempferol	Interstitial collagenase	MMP1
Panax ginseng C. A. Meyer	MOL000422	kaempferol	Signal transducer and activator of transcription 1-alpha/beta	STAT1
Panax ginseng C. A. Meyer	MOL000422	kaempferol	Cell division control protein 2 homolog	CDK1
Panax ginseng C. A. Meyer	MOL000422	kaempferol	Peroxisome proliferator-activated receptor gamma	PPARG
Panax ginseng C. A. Meyer	MOL000422	kaempferol	Heme oxygenase 1	HMOX1
Panax ginseng C. A. Meyer	MOL000422	kaempferol	Cytochrome P450 3A4	CYP3A4
Panax ginseng C. A. Meyer	MOL000422	kaempferol	Cytochrome P450 1A2	CYP1A2
Panax ginseng C. A. Meyer	MOL000422	kaempferol	Cytochrome P450 1A1	CYP1A1
Panax ginseng C. A. Meyer	MOL000422	kaempferol	Intercellular adhesion molecule 1	ICAM1
Panax ginseng C. A. Meyer	MOL000422	kaempferol	E-selectin	SELE
Panax ginseng C. A. Meyer	MOL000422	kaempferol	Vascular cell adhesion protein 1	VCAM1
Panax ginseng C. A. Meyer	MOL000422	kaempferol	Nuclear receptor subfamily 1 group I member 2	NR1I2
Panax ginseng C. A. Meyer	MOL000422	kaempferol	Cytochrome P450 1B1	CYP1B1
Panax ginseng C. A. Meyer	MOL000422	kaempferol	Arachidonate 5-lipoxygenase	ALOX5
Panax ginseng C. A. Meyer	MOL000422	kaempferol	Hyaluronan synthase 2	HAS2
Panax ginseng C. A. Meyer	MOL000422	kaempferol	Glutathione S-transferase P	GSTP1
Panax ginseng C. A. Meyer	MOL000422	kaempferol	Aryl hydrocarbon receptor	AHR
Panax ginseng C. A. Meyer	MOL000422	kaempferol	26S proteasome non-ATPase regulatory subunit 3	PSMD3
Panax ginseng C. A. Meyer	MOL000422	kaempferol	Solute carrier family 2, facilitated glucose transporter member 4	SLC2A4
Panax ginseng C. A. Meyer	MOL000422	kaempferol	Nuclear receptor subfamily 1 group I member 3	NR1I3
Panax ginseng C. A. Meyer	MOL000422	kaempferol	Insulin receptor	INSR
Panax ginseng C. A. Meyer	MOL000422	kaempferol	Type I iodothyronine deiodinase	DIO1
Panax ginseng C. A. Meyer	MOL000422	kaempferol	Serine/threonine-protein phosphatase 2B catalytic subunit alpha isoform	PPP3CA
Panax ginseng C. A. Meyer	MOL000422	kaempferol	Peroxidase C1A	PRXC1A
Panax ginseng C. A. Meyer	MOL000422	kaempferol	Glutathione S-transferase Mu 1	GSTM1
Panax ginseng C. A. Meyer	MOL000422	kaempferol	Glutathione S-transferase Mu 2	GSTM2
Panax ginseng C. A. Meyer	MOL000422	kaempferol	Aldo-keto reductase family 1 member C3	AKR1C3
Panax ginseng C. A. Meyer	MOL000422	kaempferol	Antileukoproteinase	SLPI
Panax ginseng C. A. Meyer	MOL005308	Aposiopolamine	Muscarinic acetylcholine receptor M3	CHRM3
Panax ginseng C. A. Meyer	MOL005308	Aposiopolamine	Muscarinic acetylcholine receptor M1	CHRM1
Panax ginseng C. A. Meyer	MOL005308	Aposiopolamine	Sodium-dependent noradrenaline transporter	SLC6A2
Panax ginseng C. A. Meyer	MOL005308	Aposiopolamine	Sodium-dependent dopamine transporter	SLC6A3
Panax ginseng C. A. Meyer	MOL005308	Aposiopolamine	Beta-2 adrenergic receptor	ADRB2
Panax ginseng C. A. Meyer	MOL005308	Aposiopolamine	Sodium-dependent serotonin transporter	SLC6A4
Panax ginseng C. A. Meyer	MOL005308	Aposiopolamine	Gamma-aminobutyric acid receptor subunit alpha-1	GABRA1
Panax ginseng C. A. Meyer	MOL005308	Aposiopolamine	Dipeptidyl peptidase IV	DPP4
Panax ginseng C. A. Meyer	MOL005317	Deoxyharringtonine	Androgen receptor	AR
Panax ginseng C. A. Meyer	MOL005317	Deoxyharringtonine	Mineralocorticoid receptor	NR3C2
Panax ginseng C. A. Meyer	MOL005318	Dianthramine	Prostaglandin G/H synthase 1	PTGS1
Panax ginseng C. A. Meyer	MOL005318	Dianthramine	Prostaglandin G/H synthase 2	PTGS2
Panax ginseng C. A. Meyer	MOL005318	Dianthramine	Heat shock protein HSP 90	HSP90
Panax ginseng C. A. Meyer	MOL005320	arachidonate	Prostaglandin G/H synthase 1	PTGS1
Panax ginseng C. A. Meyer	MOL005320	arachidonate	Prostaglandin G/H synthase 2	PTGS2
Panax ginseng C. A. Meyer	MOL005320	arachidonate	Retinoic acid receptor RXR-gamma	RXRG
Panax ginseng C. A. Meyer	MOL005320	arachidonate	Nuclear receptor coactivator 2	NCOA2
Panax ginseng C. A. Meyer	MOL005321	Frutinone A	Prostaglandin G/H synthase 1	PTGS1
Panax ginseng C. A. Meyer	MOL005321	Frutinone A	Thrombin	Thrombin
Panax ginseng C. A. Meyer	MOL005321	Frutinone A	Androgen receptor	AR
Panax ginseng C. A. Meyer	MOL005321	Frutinone A	Sodium channel protein type 5 subunit alpha	SCN5A
Panax ginseng C. A. Meyer	MOL005321	Frutinone A	Peroxisome proliferator activated receptor gamma	PPARG
Panax ginseng C. A. Meyer	MOL005321	Frutinone A	Prostaglandin G/H synthase 2	PTGS2
Panax ginseng C. A. Meyer	MOL005321	Frutinone A	Retinoic acid receptor RXR-alpha	RXRA
Panax ginseng C. A. Meyer	MOL005321	Frutinone A	CGMP-inhibited 3',5'-cyclic phosphodiesterase A	PDE3A
Panax ginseng C. A. Meyer	MOL005321	Frutinone A	Beta-2 adrenergic receptor	ADRB2
Panax ginseng C. A. Meyer	MOL005321	Frutinone A	Gamma-aminobutyric acid receptor subunit alpha-1	GABRA1
Panax ginseng C. A. Meyer	MOL005321	Frutinone A	Dipeptidyl peptidase IV	DPP4
Panax ginseng C. A. Meyer	MOL005321	Frutinone A	Heat shock protein HSP 90	HSP90
Panax ginseng C. A. Meyer	MOL005321	Frutinone A	Phosphatidylinositol-4,5-bisphosphate 3-kinase catalytic subunit, gamma isoform	PIK3CG
Panax ginseng C. A. Meyer	MOL005321	Frutinone A	Neuronal acetylcholine receptor protein, alpha-7 chain	CHRNA7
Panax ginseng C. A. Meyer	MOL005321	Frutinone A	mRNA of PKA Catalytic Subunit C-alpha	PKACA
Panax ginseng C. A. Meyer	MOL005321	Frutinone A	Acetylcholinesterase	ACHE
Panax ginseng C. A. Meyer	MOL005348	Ginsenoside-Rh4_qt	Mineralocorticoid receptor	NR3C2
Panax ginseng C. A. Meyer	MOL005348	Ginsenoside-Rh4_qt	Nuclear receptor coactivator 2	NCOA2
Panax ginseng C. A. Meyer	MOL005356	Girinimbin	Prostaglandin G/H synthase 1	PTGS1
Panax ginseng C. A. Meyer	MOL005356	Girinimbin	Sodium channel protein type 5 subunit alpha	SCN5A
Panax ginseng C. A. Meyer	MOL005356	Girinimbin	Prostaglandin G/H synthase 2	PTGS2
Panax ginseng C. A. Meyer	MOL005356	Girinimbin	Retinoic acid receptor RXR-alpha	RXRA
Panax ginseng C. A. Meyer	MOL005356	Girinimbin	Beta-2 adrenergic receptor	ADRB2
Panax ginseng C. A. Meyer	MOL005356	Girinimbin	Gamma-aminobutyric acid receptor subunit alpha-1	GABRA1
Panax ginseng C. A. Meyer	MOL005356	Girinimbin	Phosphatidylinositol-4,5-bisphosphate 3-kinase catalytic subunit, gamma isoform	PIK3CG
Panax ginseng C. A. Meyer	MOL005356	Girinimbin	Neuronal acetylcholine receptor protein, alpha-7 chain	CHRNA7
Panax ginseng C. A. Meyer	MOL005356	Girinimbin	mRNA of PKA Catalytic Subunit C-alpha	PKACA
Panax ginseng C. A. Meyer	MOL005356	Girinimbin	Nuclear receptor coactivator 2	NCOA2
Panax ginseng C. A. Meyer	MOL005384	suchilactone	Potassium voltage-gated channel subfamily H member 2	KCNH2
Panax ginseng C. A. Meyer	MOL005384	suchilactone	Sodium channel protein type 5 subunit alpha	SCN5A
Panax ginseng C. A. Meyer	MOL005384	suchilactone	Coagulation factor Xa	F10
Panax ginseng C. A. Meyer	MOL005384	suchilactone	Prostaglandin G/H synthase 2	PTGS2
Panax ginseng C. A. Meyer	MOL005384	suchilactone	Coagulation factor VII	F7
Panax ginseng C. A. Meyer	MOL005384	suchilactone	mRNA of Protein-tyrosine phosphatase, non-receptor type 1	PTPN1
Panax ginseng C. A. Meyer	MOL005384	suchilactone	Beta-2 adrenergic receptor	ADRB2
Panax ginseng C. A. Meyer	MOL005384	suchilactone	Heat shock protein HSP 90	HSP90
Panax ginseng C. A. Meyer	MOL005384	suchilactone	Nuclear receptor coactivator 1	NCOA1
Panax ginseng C. A. Meyer	MOL005384	suchilactone	Calcium-activated potassium channel subunit alpha 1	KCNMA1
Panax ginseng C. A. Meyer	MOL005384	suchilactone	Calmodulin	CaM
Panax ginseng C. A. Meyer	MOL005384	suchilactone	Prostaglandin G/H synthase 1	PTGS1
Panax ginseng C. A. Meyer	MOL005384	suchilactone	Retinoic acid receptor RXR-alpha	RXRA
Panax ginseng C. A. Meyer	MOL005384	suchilactone	CGMP-inhibited 3',5'-cyclic phosphodiesterase A	PDE3A
Panax ginseng C. A. Meyer	MOL005384	suchilactone	Alpha-1D adrenergic receptor	ADRA1D
Panax ginseng C. A. Meyer	MOL005399	alexandrin_qt	Progesterone receptor	PGR
Panax ginseng C. A. Meyer	MOL000787	Fumarine	Prostaglandin G/H synthase 1	PTGS1
Panax ginseng C. A. Meyer	MOL000787	Fumarine	Muscarinic acetylcholine receptor M3	CHRM3
Panax ginseng C. A. Meyer	MOL000787	Fumarine	Potassium voltage-gated channel subfamily H member 2	KCNH2
Panax ginseng C. A. Meyer	MOL000787	Fumarine	Muscarinic acetylcholine receptor M1	CHRM1
Panax ginseng C. A. Meyer	MOL000787	Fumarine	Sodium channel protein type 5 subunit alpha	SCN5A
Panax ginseng C. A. Meyer	MOL000787	Fumarine	Coagulation factor Xa	F10
Panax ginseng C. A. Meyer	MOL000787	Fumarine	Muscarinic acetylcholine receptor M5	CHRM5
Panax ginseng C. A. Meyer	MOL000787	Fumarine	Prostaglandin G/H synthase 2	PTGS2
Panax ginseng C. A. Meyer	MOL000787	Fumarine	5-hydroxytryptamine receptor 3A	HTR3A
Panax ginseng C. A. Meyer	MOL000787	Fumarine	Coagulation factor VII	F7
Panax ginseng C. A. Meyer	MOL000787	Fumarine	Muscarinic acetylcholine receptor M4	CHRM4
Panax ginseng C. A. Meyer	MOL000787	Fumarine	Delta-type opioid receptor	OPRD1
Panax ginseng C. A. Meyer	MOL000787	Fumarine	5-hydroxytryptamine 2A receptor	HTR2A
Panax ginseng C. A. Meyer	MOL000787	Fumarine	Alpha-1B adrenergic receptor	ADRA1B
Panax ginseng C. A. Meyer	MOL000787	Fumarine	Beta-2 adrenergic receptor	ADRB2
Panax ginseng C. A. Meyer	MOL000787	Fumarine	Alpha-1D adrenergic receptor	ADRA1D
Panax ginseng C. A. Meyer	MOL000787	Fumarine	Mu-type opioid receptor	OPRM1
Panax ginseng C. A. Meyer	MOL000787	Fumarine	Heat shock protein HSP 90	HSP90
Panax ginseng C. A. Meyer	MOL000787	Fumarine	mRNA of PKA Catalytic Subunit C-alpha	PKACA
Panax ginseng C. A. Meyer	MOL000787	Fumarine	Calmodulin	CaM
Panax ginseng C. A. Meyer	MOL000787	Fumarine	Sodium-dependent serotonin transporter	SLC6A4
Panax ginseng C. A. Meyer	MOL000787	Fumarine	Voltage-dependent L-type calcium channel subunit alpha-1S	CACNA1S
Panax ginseng C. A. Meyer	MOL000787	Fumarine	CGMP-inhibited 3',5'-cyclic phosphodiesterase A	PDE3A
Panax ginseng C. A. Meyer	MOL000787	Fumarine	Sodium-dependent dopamine transporter	SLC6A3
Panax ginseng C. A. Meyer	MOL000787	Fumarine	DNA topoisomerase II	TOP2
Panax ginseng C. A. Meyer	MOL000787	Fumarine	Dopamine D1 receptor	DRD1
Panax ginseng C. A. Meyer	MOL000787	Fumarine	Vascular endothelial growth factor receptor 2	KDR
AtractylodesmacrocephalaKoidz	MOL000022	14-acetyl-12-senecioyl-2E,8Z,10E-atractylentriol	Prostaglandin G/H synthase 2	PTGS2
AtractylodesmacrocephalaKoidz	MOL000033	(3S,8S,9S,10R,13R,14S,17R)-10,13-dimethyl-17-[(2R,5S)-5-propan-2-yloctan-2-yl]-2,3,4,7,8,9,11,12,14,15,16,17-dodecahydro-1H-cyclopenta[a]phenanthren-3-ol	Progesterone receptor	PGR
AtractylodesmacrocephalaKoidz	MOL000049	3β-acetoxyatractylone	Muscarinic acetylcholine receptor M3	CHRM3
AtractylodesmacrocephalaKoidz	MOL000049	3β-acetoxyatractylone	Thrombin	Thrombin
AtractylodesmacrocephalaKoidz	MOL000049	3β-acetoxyatractylone	Muscarinic acetylcholine receptor M1	CHRM1
AtractylodesmacrocephalaKoidz	MOL000049	3β-acetoxyatractylone	Androgen receptor	AR
AtractylodesmacrocephalaKoidz	MOL000049	3β-acetoxyatractylone	Sodium channel protein type 5 subunit alpha	SCN5A
AtractylodesmacrocephalaKoidz	MOL000049	3β-acetoxyatractylone	Prostaglandin G/H synthase 2	PTGS2
AtractylodesmacrocephalaKoidz	MOL000049	3β-acetoxyatractylone	Nitric-oxide synthase, endothelial	NOS3
AtractylodesmacrocephalaKoidz	MOL000049	3β-acetoxyatractylone	Retinoic acid receptor RXR-alpha	RXRA
AtractylodesmacrocephalaKoidz	MOL000049	3β-acetoxyatractylone	Acetylcholinesterase	ACHE
AtractylodesmacrocephalaKoidz	MOL000049	3β-acetoxyatractylone	Alpha-1A adrenergic receptor	ADRA1A
AtractylodesmacrocephalaKoidz	MOL000049	3β-acetoxyatractylone	Muscarinic acetylcholine receptor M2	CHRM2
AtractylodesmacrocephalaKoidz	MOL000049	3β-acetoxyatractylone	Beta-2 adrenergic receptor	ADRB2
AtractylodesmacrocephalaKoidz	MOL000049	3β-acetoxyatractylone	Mu-type opioid receptor	OPRM1
AtractylodesmacrocephalaKoidz	MOL000049	3β-acetoxyatractylone	Gamma-aminobutyric acid receptor subunit alpha-1	GABRA1
AtractylodesmacrocephalaKoidz	MOL000049	3β-acetoxyatractylone	Dipeptidyl peptidase IV	DPP4
AtractylodesmacrocephalaKoidz	MOL000049	3β-acetoxyatractylone	Neuronal acetylcholine receptor protein, alpha-7 chain	CHRNA7
AtractylodesmacrocephalaKoidz	MOL000072	8β-ethoxy atractylenolide Ⅲ	Prostaglandin G/H synthase 2	PTGS2
AtractylodesmacrocephalaKoidz	MOL000072	8β-ethoxy atractylenolide Ⅲ	Gamma-aminobutyric acid receptor subunit alpha-1	GABRA1
AtractylodesmacrocephalaKoidz	MOL000072	8β-ethoxy atractylenolide Ⅲ	Neuronal acetylcholine receptor protein, alpha-7 chain	CHRNA7
AtractylodesmacrocephalaKoidz	MOL000072	8β-ethoxy atractylenolide Ⅲ	Nuclear receptor coactivator 2	NCOA2
AtractylodesmacrocephalaKoidz	MOL000072	8β-ethoxy atractylenolide Ⅲ	Nuclear receptor coactivator 1	NCOA1
Poria cocos (Schw.)Wolf (sclerotia)	MOL000273	(2R)-2-[(3S,5R,10S,13R,14R,16R,17R)-3,16-dihydroxy-4,4,10,13,14-pentamethyl-2,3,5,6,12,15,16,17-octahydro-1H-cyclopenta[a]phenanthren-17-yl]-6-methylhept-5-enoic acid	Mineralocorticoid receptor	NR3C2
Poria cocos (Schw.)Wolf (sclerotia)	MOL000273	(2R)-2-[(3S,5R,10S,13R,14R,16R,17R)-3,16-dihydroxy-4,4,10,13,14-pentamethyl-2,3,5,6,12,15,16,17-octahydro-1H-cyclopenta[a]phenanthren-17-yl]-6-methylhept-5-enoic acid	Nuclear receptor coactivator 2	NCOA2
Poria cocos (Schw.)Wolf (sclerotia)	MOL000275	trametenolic acid	Mineralocorticoid receptor	NR3C2
Poria cocos (Schw.)Wolf (sclerotia)	MOL000279	Cerevisterol	Mineralocorticoid receptor	NR3C2
Poria cocos (Schw.)Wolf (sclerotia)	MOL000282	ergosta-7,22E-dien-3beta-ol	Progesterone receptor	PGR
Poria cocos (Schw.)Wolf (sclerotia)	MOL000283	Ergosterol peroxide	Progesterone receptor	PGR
Poria cocos (Schw.)Wolf (sclerotia)	MOL000296	hederagenin	Progesterone receptor	PGR
Poria cocos (Schw.)Wolf (sclerotia)	MOL000296	hederagenin	Nuclear receptor coactivator 2	NCOA2
Poria cocos (Schw.)Wolf (sclerotia)	MOL000296	hederagenin	Muscarinic acetylcholine receptor M3	CHRM3
Poria cocos (Schw.)Wolf (sclerotia)	MOL000296	hederagenin	Muscarinic acetylcholine receptor M1	CHRM1
Poria cocos (Schw.)Wolf (sclerotia)	MOL000296	hederagenin	Gamma-aminobutyric-acid receptor alpha-2 subunit	GABRA2
Poria cocos (Schw.)Wolf (sclerotia)	MOL000296	hederagenin	Gamma-aminobutyric-acid receptor alpha-3 subunit	GABRA3
Poria cocos (Schw.)Wolf (sclerotia)	MOL000296	hederagenin	Muscarinic acetylcholine receptor M2	CHRM2
Poria cocos (Schw.)Wolf (sclerotia)	MOL000296	hederagenin	Alpha-1B adrenergic receptor	ADRA1B
Poria cocos (Schw.)Wolf (sclerotia)	MOL000296	hederagenin	Gamma-aminobutyric acid receptor subunit alpha-1	GABRA1
Poria cocos (Schw.)Wolf (sclerotia)	MOL000296	hederagenin	Glutamate receptor 2	GRIA2
Poria cocos (Schw.)Wolf (sclerotia)	MOL000296	hederagenin	Gamma-aminobutyric-acid receptor subunit alpha-6	GABRA6
Poria cocos (Schw.)Wolf (sclerotia)	MOL000296	hederagenin	Gamma-aminobutyric-acid receptor alpha-5 subunit	GABRA5
Poria cocos (Schw.)Wolf (sclerotia)	MOL000296	hederagenin	Ig gamma-1 chain C region	Ighg1
Poria cocos (Schw.)Wolf (sclerotia)	MOL000296	hederagenin	Alcohol dehydrogenase 1B	ADH1B
Poria cocos (Schw.)Wolf (sclerotia)	MOL000296	hederagenin	Alcohol dehydrogenase 1C	ADH1C
Poria cocos (Schw.)Wolf (sclerotia)	MOL000296	hederagenin	Lysozyme	Lysozyme
Poria cocos (Schw.)Wolf (sclerotia)	MOL000296	hederagenin	Nicotinate-nucleotide--dimethylbenzimidazole phosphoribosyltransferase	cobT
Poria cocos (Schw.)Wolf (sclerotia)	MOL000296	hederagenin	Prostaglandin G/H synthase 1	PTGS1
Poria cocos (Schw.)Wolf (sclerotia)	MOL000296	hederagenin	Sodium channel protein type 5 subunit alpha	SCN5A
Poria cocos (Schw.)Wolf (sclerotia)	MOL000296	hederagenin	Prostaglandin G/H synthase 2	PTGS2
Poria cocos (Schw.)Wolf (sclerotia)	MOL000296	hederagenin	Retinoic acid receptor RXR-alpha	RXRA
Poria cocos (Schw.)Wolf (sclerotia)	MOL000296	hederagenin	CGMP-inhibited 3',5'-cyclic phosphodiesterase A	PDE3A
Poria cocos (Schw.)Wolf (sclerotia)	MOL000296	hederagenin	Sodium-dependent noradrenaline transporter	SLC6A2
Poria cocos (Schw.)Wolf (sclerotia)	MOL000296	hederagenin	Cytochrome P450-cam	CYP450
Glycyrrhizae	MOL001792	DFV	Prostaglandin G/H synthase 1	PTGS1
Glycyrrhizae	MOL001792	DFV	Estrogen receptor	ESR1
Glycyrrhizae	MOL001792	DFV	Prostaglandin G/H synthase 2	PTGS2
Glycyrrhizae	MOL001792	DFV	Retinoic acid receptor RXR-alpha	RXRA
Glycyrrhizae	MOL001792	DFV	Beta-2 adrenergic receptor	ADRB2
Glycyrrhizae	MOL001792	DFV	Heat shock protein HSP 90	HSP90
Glycyrrhizae	MOL001792	DFV	Phosphatidylinositol-4,5-bisphosphate 3-kinase catalytic subunit, gamma isoform	PIK3CG
Glycyrrhizae	MOL001792	DFV	mRNA of PKA Catalytic Subunit C-alpha	PKACA
Glycyrrhizae	MOL001792	DFV	Beta-lactamase	ESBL
Glycyrrhizae	MOL001792	DFV	Amine oxidase [flavin-containing] B	MAOB
Glycyrrhizae	MOL001792	DFV	Sodium-dependent serotonin transporter	SLC6A4
Glycyrrhizae	MOL001792	DFV	cAMP-dependent protein kinase inhibitor alpha	PKIA
Glycyrrhizae	MOL001484	Inermine	Prostaglandin G/H synthase 1	PTGS1
Glycyrrhizae	MOL001484	Inermine	Muscarinic acetylcholine receptor M3	CHRM3
Glycyrrhizae	MOL001484	Inermine	Sodium channel protein type 5 subunit alpha	SCN5A
Glycyrrhizae	MOL001484	Inermine	Prostaglandin G/H synthase 2	PTGS2
Glycyrrhizae	MOL001484	Inermine	5-hydroxytryptamine receptor 3A	HTR3A
Glycyrrhizae	MOL001484	Inermine	Retinoic acid receptor RXR-alpha	RXRA
Glycyrrhizae	MOL001484	Inermine	Alpha-1B adrenergic receptor	ADRA1B
Glycyrrhizae	MOL001484	Inermine	Alpha-1D adrenergic receptor	ADRA1D
Glycyrrhizae	MOL001484	Inermine	Phosphatidylinositol-4,5-bisphosphate 3-kinase catalytic subunit, gamma isoform	PIK3CG
Glycyrrhizae	MOL001484	Inermine	mRNA of PKA Catalytic Subunit C-alpha	PKACA
Glycyrrhizae	MOL001484	Inermine	Ig gamma-1 chain C region	Ighg1
Glycyrrhizae	MOL001484	Inermine	Trypsin-1	PRSS1
Glycyrrhizae	MOL001484	Inermine	Calmodulin	CaM
Glycyrrhizae	MOL001484	Inermine	Muscarinic acetylcholine receptor M1	CHRM1
Glycyrrhizae	MOL001484	Inermine	Beta-2 adrenergic receptor	ADRB2
Glycyrrhizae	MOL001484	Inermine	Mu-type opioid receptor	OPRM1
Glycyrrhizae	MOL001484	Inermine	Heat shock protein HSP 90	HSP90
Glycyrrhizae	MOL000211	Mairin	Progesterone receptor	PGR
Glycyrrhizae	MOL002311	Glycyrol	Nitric oxide synthase, inducible	NOS2
Glycyrrhizae	MOL002311	Glycyrol	Estrogen receptor	ESR1
Glycyrrhizae	MOL002311	Glycyrol	Peroxisome proliferator activated receptor gamma	PPARG
Glycyrrhizae	MOL002311	Glycyrol	Prostaglandin G/H synthase 2	PTGS2
Glycyrrhizae	MOL002311	Glycyrol	Vascular endothelial growth factor receptor 2	KDR
Glycyrrhizae	MOL002311	Glycyrol	Mitogen-activated protein kinase 14	MAPK14
Glycyrrhizae	MOL002311	Glycyrol	Glycogen synthase kinase-3 beta	GSK3B
Glycyrrhizae	MOL002311	Glycyrol	Serine/threonine-protein kinase Chk1	CHEK1
Glycyrrhizae	MOL002311	Glycyrol	Proto-oncogene serine/threonine-protein kinase Pim-1	PIM1
Glycyrrhizae	MOL002311	Glycyrol	Cyclin-A2	CCNA2
Glycyrrhizae	MOL002311	Glycyrol	Thrombin	Thrombin
Glycyrrhizae	MOL000239	Jaranol	Nitric oxide synthase, inducible	NOS2
Glycyrrhizae	MOL000239	Jaranol	Prostaglandin G/H synthase 1	PTGS1
Glycyrrhizae	MOL000239	Jaranol	Androgen receptor	AR
Glycyrrhizae	MOL000239	Jaranol	Sodium channel protein type 5 subunit alpha	SCN5A
Glycyrrhizae	MOL000239	Jaranol	Prostaglandin G/H synthase 2	PTGS2
Glycyrrhizae	MOL000239	Jaranol	Estrogen receptor beta	ESR2
Glycyrrhizae	MOL000239	Jaranol	Dipeptidyl peptidase IV	DPP4
Glycyrrhizae	MOL000239	Jaranol	Heat shock protein HSP 90	HSP90
Glycyrrhizae	MOL000239	Jaranol	Cell division protein kinase 2	CDK2
Glycyrrhizae	MOL000239	Jaranol	Serine/threonine-protein kinase Chk1	CHEK1
Glycyrrhizae	MOL000239	Jaranol	Trypsin-1	PRSS1
Glycyrrhizae	MOL000239	Jaranol	Nuclear receptor coactivator 2	NCOA2
Glycyrrhizae	MOL000239	Jaranol	Calmodulin	CaM
Glycyrrhizae	MOL002565	Medicarpin	Nitric oxide synthase, inducible	NOS2
Glycyrrhizae	MOL002565	Medicarpin	Prostaglandin G/H synthase 1	PTGS1
Glycyrrhizae	MOL002565	Medicarpin	Dopamine D1 receptor	DRD1
Glycyrrhizae	MOL002565	Medicarpin	Muscarinic acetylcholine receptor M3	CHRM3
Glycyrrhizae	MOL002565	Medicarpin	Muscarinic acetylcholine receptor M1	CHRM1
Glycyrrhizae	MOL002565	Medicarpin	Estrogen receptor	ESR1
Glycyrrhizae	MOL002565	Medicarpin	Sodium channel protein type 5 subunit alpha	SCN5A
Glycyrrhizae	MOL002565	Medicarpin	Muscarinic acetylcholine receptor M5	CHRM5
Glycyrrhizae	MOL002565	Medicarpin	Prostaglandin G/H synthase 2	PTGS2
Glycyrrhizae	MOL002565	Medicarpin	Muscarinic acetylcholine receptor M4	CHRM4
Glycyrrhizae	MOL002565	Medicarpin	Retinoic acid receptor RXR-alpha	RXRA
Glycyrrhizae	MOL002565	Medicarpin	5-hydroxytryptamine 2A receptor	HTR2A
Glycyrrhizae	MOL002565	Medicarpin	Alpha-1A adrenergic receptor	ADRA1A
Glycyrrhizae	MOL002565	Medicarpin	Muscarinic acetylcholine receptor M2	CHRM2
Glycyrrhizae	MOL002565	Medicarpin	Alpha-1B adrenergic receptor	ADRA1B
Glycyrrhizae	MOL002565	Medicarpin	Sodium-dependent dopamine transporter	SLC6A3
Glycyrrhizae	MOL002565	Medicarpin	Beta-2 adrenergic receptor	ADRB2
Glycyrrhizae	MOL002565	Medicarpin	Sodium-dependent serotonin transporter	SLC6A4
Glycyrrhizae	MOL002565	Medicarpin	Mu-type opioid receptor	OPRM1
Glycyrrhizae	MOL002565	Medicarpin	Estrogen receptor beta	ESR2
Glycyrrhizae	MOL002565	Medicarpin	Dipeptidyl peptidase IV	DPP4
Glycyrrhizae	MOL002565	Medicarpin	Mitogen-activated protein kinase 10	MAPK10
Glycyrrhizae	MOL002565	Medicarpin	Heat shock protein HSP 90	HSP90
Glycyrrhizae	MOL002565	Medicarpin	Cell division protein kinase 2	CDK2
Glycyrrhizae	MOL002565	Medicarpin	Phosphatidylinositol-4,5-bisphosphate 3-kinase catalytic subunit, gamma isoform	PIK3CG
Glycyrrhizae	MOL002565	Medicarpin	Neuronal acetylcholine receptor protein, alpha-7 chain	CHRNA7
Glycyrrhizae	MOL002565	Medicarpin	mRNA of PKA Catalytic Subunit C-alpha	PKACA
Glycyrrhizae	MOL002565	Medicarpin	Trypsin-1	PRSS1
Glycyrrhizae	MOL002565	Medicarpin	Proto-oncogene serine/threonine-protein kinase Pim-1	PIM1
Glycyrrhizae	MOL002565	Medicarpin	Cyclin-A2	CCNA2
Glycyrrhizae	MOL002565	Medicarpin	Calmodulin	CaM
Glycyrrhizae	MOL002565	Medicarpin	Delta-type opioid receptor	OPRD1
Glycyrrhizae	MOL002565	Medicarpin	CGMP-inhibited 3',5'-cyclic phosphodiesterase A	PDE3A
Glycyrrhizae	MOL002565	Medicarpin	Alpha-1D adrenergic receptor	ADRA1D
Glycyrrhizae	MOL000354	isorhamnetin	Nitric oxide synthase, inducible	NOS2
Glycyrrhizae	MOL000354	isorhamnetin	Prostaglandin G/H synthase 1	PTGS1
Glycyrrhizae	MOL000354	isorhamnetin	Estrogen receptor	ESR1
Glycyrrhizae	MOL000354	isorhamnetin	Androgen receptor	AR
Glycyrrhizae	MOL000354	isorhamnetin	Peroxisome proliferator activated receptor gamma	PPARG
Glycyrrhizae	MOL000354	isorhamnetin	Prostaglandin G/H synthase 2	PTGS2
Glycyrrhizae	MOL000354	isorhamnetin	mRNA of Protein-tyrosine phosphatase, non-receptor type 1	PTPN1
Glycyrrhizae	MOL000354	isorhamnetin	Estrogen receptor beta	ESR2
Glycyrrhizae	MOL000354	isorhamnetin	Dipeptidyl peptidase IV	DPP4
Glycyrrhizae	MOL000354	isorhamnetin	Mitogen-activated protein kinase 14	MAPK14
Glycyrrhizae	MOL000354	isorhamnetin	Glycogen synthase kinase-3 beta	GSK3B
Glycyrrhizae	MOL000354	isorhamnetin	Heat shock protein HSP 90	HSP90
Glycyrrhizae	MOL000354	isorhamnetin	Cell division protein kinase 2	CDK2
Glycyrrhizae	MOL000354	isorhamnetin	Phosphatidylinositol-4,5-bisphosphate 3-kinase catalytic subunit, gamma isoform	PIK3CG
Glycyrrhizae	MOL000354	isorhamnetin	mRNA of PKA Catalytic Subunit C-alpha	PKACA
Glycyrrhizae	MOL000354	isorhamnetin	Trypsin-1	PRSS1
Glycyrrhizae	MOL000354	isorhamnetin	Proto-oncogene serine/threonine-protein kinase Pim-1	PIM1
Glycyrrhizae	MOL000354	isorhamnetin	Cyclin-A2	CCNA2
Glycyrrhizae	MOL000354	isorhamnetin	Nuclear receptor coactivator 2	NCOA2
Glycyrrhizae	MOL000354	isorhamnetin	Calmodulin	CaM
Glycyrrhizae	MOL000354	isorhamnetin	Glycogen phosphorylase, muscle form	PYGM
Glycyrrhizae	MOL000354	isorhamnetin	Peroxisome proliferator activated receptor delta	PPARD
Glycyrrhizae	MOL000354	isorhamnetin	Serine/threonine-protein kinase Chk1	CHEK1
Glycyrrhizae	MOL000354	isorhamnetin	Aldose reductase	AKR1B1
Glycyrrhizae	MOL000354	isorhamnetin	Nuclear receptor coactivator 1	NCOA1
Glycyrrhizae	MOL000354	isorhamnetin	Coagulation factor VII	F7
Glycyrrhizae	MOL000354	isorhamnetin	Thrombin	Thrombin
Glycyrrhizae	MOL000354	isorhamnetin	Nitric-oxide synthase, endothelial	NOS3
Glycyrrhizae	MOL000354	isorhamnetin	Acetylcholinesterase	ACHE
Glycyrrhizae	MOL000354	isorhamnetin	Gamma-aminobutyric acid receptor subunit alpha-1	GABRA1
Glycyrrhizae	MOL000354	isorhamnetin	Amine oxidase [flavin-containing] B	MAOB
Glycyrrhizae	MOL000354	isorhamnetin	Glutamate receptor 2	GRIA2
Glycyrrhizae	MOL000354	isorhamnetin	Cytochrome P450-cam	CYP450
Glycyrrhizae	MOL000354	isorhamnetin	Transcription factor p65	RELA
Glycyrrhizae	MOL000354	isorhamnetin	Xanthine dehydrogenase/oxidase	XDH
Glycyrrhizae	MOL000354	isorhamnetin	Neutrophil cytosol factor 1	NCF1
Glycyrrhizae	MOL000354	isorhamnetin	Oxidized low-density lipoprotein receptor 1	OLR1
Glycyrrhizae	MOL000359	sitosterol	Progesterone receptor	PGR
Glycyrrhizae	MOL000359	sitosterol	Nuclear receptor coactivator 2	NCOA2
Glycyrrhizae	MOL000359	sitosterol	Mineralocorticoid receptor	NR3C2
Glycyrrhizae	MOL003656	Lupiwighteone	Nitric oxide synthase, inducible	NOS2
Glycyrrhizae	MOL003656	Lupiwighteone	Thrombin	Thrombin
Glycyrrhizae	MOL003656	Lupiwighteone	Estrogen receptor	ESR1
Glycyrrhizae	MOL003656	Lupiwighteone	Androgen receptor	AR
Glycyrrhizae	MOL003656	Lupiwighteone	Sodium channel protein type 5 subunit alpha	SCN5A
Glycyrrhizae	MOL003656	Lupiwighteone	Peroxisome proliferator activated receptor gamma	PPARG
Glycyrrhizae	MOL003656	Lupiwighteone	Coagulation factor Xa	F10
Glycyrrhizae	MOL003656	Lupiwighteone	Prostaglandin G/H synthase 2	PTGS2
Glycyrrhizae	MOL003656	Lupiwighteone	DNA topoisomerase II	TOP2
Glycyrrhizae	MOL003656	Lupiwighteone	Estrogen receptor beta	ESR2
Glycyrrhizae	MOL003656	Lupiwighteone	Dipeptidyl peptidase IV	DPP4
Glycyrrhizae	MOL003656	Lupiwighteone	Mitogen-activated protein kinase 14	MAPK14
Glycyrrhizae	MOL003656	Lupiwighteone	Glycogen synthase kinase-3 beta	GSK3B
Glycyrrhizae	MOL003656	Lupiwighteone	Heat shock protein HSP 90	HSP90
Glycyrrhizae	MOL003656	Lupiwighteone	Cell division protein kinase 2	CDK2
Glycyrrhizae	MOL003656	Lupiwighteone	Serine/threonine-protein kinase Chk1	CHEK1
Glycyrrhizae	MOL003656	Lupiwighteone	Trypsin-1	PRSS1
Glycyrrhizae	MOL003656	Lupiwighteone	Proto-oncogene serine/threonine-protein kinase Pim-1	PIM1
Glycyrrhizae	MOL003656	Lupiwighteone	Cyclin-A2	CCNA2
Glycyrrhizae	MOL003656	Lupiwighteone	Nuclear receptor coactivator 2	NCOA2
Glycyrrhizae	MOL003656	Lupiwighteone	Calmodulin	CaM
Glycyrrhizae	MOL003896	7-Methoxy-2-methyl isoflavone	Nitric oxide synthase, inducible	NOS2
Glycyrrhizae	MOL003896	7-Methoxy-2-methyl isoflavone	Prostaglandin G/H synthase 1	PTGS1
Glycyrrhizae	MOL003896	7-Methoxy-2-methyl isoflavone	Dopamine D1 receptor	DRD1
Glycyrrhizae	MOL003896	7-Methoxy-2-methyl isoflavone	Muscarinic acetylcholine receptor M3	CHRM3
Glycyrrhizae	MOL003896	7-Methoxy-2-methyl isoflavone	Thrombin	Thrombin
Glycyrrhizae	MOL003896	7-Methoxy-2-methyl isoflavone	Muscarinic acetylcholine receptor M1	CHRM1
Glycyrrhizae	MOL003896	7-Methoxy-2-methyl isoflavone	Estrogen receptor	ESR1
Glycyrrhizae	MOL003896	7-Methoxy-2-methyl isoflavone	Androgen receptor	AR
Glycyrrhizae	MOL003896	7-Methoxy-2-methyl isoflavone	Beta-1 adrenergic receptor	ADRB1
Glycyrrhizae	MOL003896	7-Methoxy-2-methyl isoflavone	Sodium channel protein type 5 subunit alpha	SCN5A
Glycyrrhizae	MOL003896	7-Methoxy-2-methyl isoflavone	Peroxisome proliferator activated receptor gamma	PPARG
Glycyrrhizae	MOL003896	7-Methoxy-2-methyl isoflavone	Prostaglandin G/H synthase 2	PTGS2
Glycyrrhizae	MOL003896	7-Methoxy-2-methyl isoflavone	Retinoic acid receptor RXR-alpha	RXRA
Glycyrrhizae	MOL003896	7-Methoxy-2-methyl isoflavone	Acetylcholinesterase	ACHE
Glycyrrhizae	MOL003896	7-Methoxy-2-methyl isoflavone	CGMP-inhibited 3',5'-cyclic phosphodiesterase A	PDE3A
Glycyrrhizae	MOL003896	7-Methoxy-2-methyl isoflavone	Alpha-1B adrenergic receptor	ADRA1B
Glycyrrhizae	MOL003896	7-Methoxy-2-methyl isoflavone	Sodium-dependent dopamine transporter	SLC6A3
Glycyrrhizae	MOL003896	7-Methoxy-2-methyl isoflavone	Beta-2 adrenergic receptor	ADRB2
Glycyrrhizae	MOL003896	7-Methoxy-2-methyl isoflavone	Alpha-1D adrenergic receptor	ADRA1D
Glycyrrhizae	MOL003896	7-Methoxy-2-methyl isoflavone	Sodium-dependent serotonin transporter	SLC6A4
Glycyrrhizae	MOL003896	7-Methoxy-2-methyl isoflavone	Estrogen receptor beta	ESR2
Glycyrrhizae	MOL003896	7-Methoxy-2-methyl isoflavone	Gamma-aminobutyric acid receptor subunit alpha-1	GABRA1
Glycyrrhizae	MOL003896	7-Methoxy-2-methyl isoflavone	Dipeptidyl peptidase IV	DPP4
Glycyrrhizae	MOL003896	7-Methoxy-2-methyl isoflavone	Mitogen-activated protein kinase 14	MAPK14
Glycyrrhizae	MOL003896	7-Methoxy-2-methyl isoflavone	Glycogen synthase kinase-3 beta	GSK3B
Glycyrrhizae	MOL003896	7-Methoxy-2-methyl isoflavone	Heat shock protein HSP 90	HSP90
Glycyrrhizae	MOL003896	7-Methoxy-2-methyl isoflavone	Cell division protein kinase 2	CDK2
Glycyrrhizae	MOL003896	7-Methoxy-2-methyl isoflavone	Leukotriene A-4 hydrolase	LTA4H
Glycyrrhizae	MOL003896	7-Methoxy-2-methyl isoflavone	Amine oxidase [flavin-containing] B	MAOB
Glycyrrhizae	MOL003896	7-Methoxy-2-methyl isoflavone	Neuronal acetylcholine receptor protein, alpha-7 chain	CHRNA7
Glycyrrhizae	MOL003896	7-Methoxy-2-methyl isoflavone	Serine/threonine-protein kinase Chk1	CHEK1
Glycyrrhizae	MOL003896	7-Methoxy-2-methyl isoflavone	mRNA of PKA Catalytic Subunit C-alpha	PKACA
Glycyrrhizae	MOL003896	7-Methoxy-2-methyl isoflavone	Ig gamma-1 chain C region	Ighg1
Glycyrrhizae	MOL003896	7-Methoxy-2-methyl isoflavone	Trypsin-1	PRSS1
Glycyrrhizae	MOL003896	7-Methoxy-2-methyl isoflavone	Proto-oncogene serine/threonine-protein kinase Pim-1	PIM1
Glycyrrhizae	MOL003896	7-Methoxy-2-methyl isoflavone	Cyclin-A2	CCNA2
Glycyrrhizae	MOL003896	7-Methoxy-2-methyl isoflavone	Nuclear receptor coactivator 1	NCOA1
Glycyrrhizae	MOL003896	7-Methoxy-2-methyl isoflavone	cAMP-dependent protein kinase inhibitor alpha	PKIA
Glycyrrhizae	MOL003896	7-Methoxy-2-methyl isoflavone	Calmodulin	CaM
Glycyrrhizae	MOL003896	7-Methoxy-2-methyl isoflavone	Muscarinic acetylcholine receptor M5	CHRM5
Glycyrrhizae	MOL003896	7-Methoxy-2-methyl isoflavone	Nitric-oxide synthase, endothelial	NOS3
Glycyrrhizae	MOL003896	7-Methoxy-2-methyl isoflavone	Mu-type opioid receptor	OPRM1
Glycyrrhizae	MOL003896	7-Methoxy-2-methyl isoflavone	Nuclear receptor coactivator 2	NCOA2
Glycyrrhizae	MOL000392	formononetin	Nitric oxide synthase, inducible	NOS2
Glycyrrhizae	MOL000392	formononetin	Prostaglandin G/H synthase 1	PTGS1
Glycyrrhizae	MOL000392	formononetin	Muscarinic acetylcholine receptor M1	CHRM1
Glycyrrhizae	MOL000392	formononetin	Estrogen receptor	ESR1
Glycyrrhizae	MOL000392	formononetin	Androgen receptor	AR
Glycyrrhizae	MOL000392	formononetin	Peroxisome proliferator activated receptor gamma	PPARG
Glycyrrhizae	MOL000392	formononetin	Prostaglandin G/H synthase 2	PTGS2
Glycyrrhizae	MOL000392	formononetin	Retinoic acid receptor RXR-alpha	RXRA
Glycyrrhizae	MOL000392	formononetin	CGMP-inhibited 3',5'-cyclic phosphodiesterase A	PDE3A
Glycyrrhizae	MOL000392	formononetin	Alpha-1A adrenergic receptor	ADRA1A
Glycyrrhizae	MOL000392	formononetin	Sodium-dependent dopamine transporter	SLC6A3
Glycyrrhizae	MOL000392	formononetin	Beta-2 adrenergic receptor	ADRB2
Glycyrrhizae	MOL000392	formononetin	Sodium-dependent serotonin transporter	SLC6A4
Glycyrrhizae	MOL000392	formononetin	Estrogen receptor beta	ESR2
Glycyrrhizae	MOL000392	formononetin	Dipeptidyl peptidase IV	DPP4
Glycyrrhizae	MOL000392	formononetin	Mitogen-activated protein kinase 14	MAPK14
Glycyrrhizae	MOL000392	formononetin	Glycogen synthase kinase-3 beta	GSK3B
Glycyrrhizae	MOL000392	formononetin	Heat shock protein HSP 90	HSP90
Glycyrrhizae	MOL000392	formononetin	Cell division protein kinase 2	CDK2
Glycyrrhizae	MOL000392	formononetin	Amine oxidase [flavin-containing] B	MAOB
Glycyrrhizae	MOL000392	formononetin	Serine/threonine-protein kinase Chk1	CHEK1
Glycyrrhizae	MOL000392	formononetin	mRNA of PKA Catalytic Subunit C-alpha	PKACA
Glycyrrhizae	MOL000392	formononetin	Trypsin-1	PRSS1
Glycyrrhizae	MOL000392	formononetin	Proto-oncogene serine/threonine-protein kinase Pim-1	PIM1
Glycyrrhizae	MOL000392	formononetin	Cyclin-A2	CCNA2
Glycyrrhizae	MOL000392	formononetin	Calmodulin	CaM
Glycyrrhizae	MOL000392	formononetin	cAMP-dependent protein kinase inhibitor alpha	PKIA
Glycyrrhizae	MOL000392	formononetin	Thrombin	Thrombin
Glycyrrhizae	MOL000392	formononetin	Nitric-oxide synthase, endothelial	NOS3
Glycyrrhizae	MOL000392	formononetin	Acetylcholinesterase	ACHE
Glycyrrhizae	MOL000392	formononetin	Beta-lactamase	ESBL
Glycyrrhizae	MOL000392	formononetin	Transcription factor AP-1	JUN
Glycyrrhizae	MOL000392	formononetin	Peroxisome proliferator-activated receptor gamma	PPARG
Glycyrrhizae	MOL000392	formononetin	Interleukin-4	IL4
Glycyrrhizae	MOL000392	formononetin	NAD-dependent deacetylase sirtuin-1	SIRT1
Glycyrrhizae	MOL000392	formononetin	ATP synthase subunit beta, mitochondrial	ATP5F1B
Glycyrrhizae	MOL000392	formononetin	NADH-ubiquinone oxidoreductase chain 6	MT-ND6
Glycyrrhizae	MOL000392	formononetin	3 beta-hydroxysteroid dehydrogenase/Delta 5-->4-isomerase type 2	HSD3B2
Glycyrrhizae	MOL000392	formononetin	3 beta-hydroxysteroid dehydrogenase/Delta 5-->4-isomerase type 1	HSD3B1
Glycyrrhizae	MOL000417	Calycosin	Nitric oxide synthase, inducible	NOS2
Glycyrrhizae	MOL000417	Calycosin	Prostaglandin G/H synthase 1	PTGS1
Glycyrrhizae	MOL000417	Calycosin	Estrogen receptor	ESR1
Glycyrrhizae	MOL000417	Calycosin	Androgen receptor	AR
Glycyrrhizae	MOL000417	Calycosin	Peroxisome proliferator activated receptor gamma	PPARG
Glycyrrhizae	MOL000417	Calycosin	Prostaglandin G/H synthase 2	PTGS2
Glycyrrhizae	MOL000417	Calycosin	Retinoic acid receptor RXR-alpha	RXRA
Glycyrrhizae	MOL000417	Calycosin	CGMP-inhibited 3',5'-cyclic phosphodiesterase A	PDE3A
Glycyrrhizae	MOL000417	Calycosin	Estrogen receptor beta	ESR2
Glycyrrhizae	MOL000417	Calycosin	Dipeptidyl peptidase IV	DPP4
Glycyrrhizae	MOL000417	Calycosin	Mitogen-activated protein kinase 14	MAPK14
Glycyrrhizae	MOL000417	Calycosin	Glycogen synthase kinase-3 beta	GSK3B
Glycyrrhizae	MOL000417	Calycosin	Heat shock protein HSP 90	HSP90
Glycyrrhizae	MOL000417	Calycosin	Cell division protein kinase 2	CDK2
Glycyrrhizae	MOL000417	Calycosin	Serine/threonine-protein kinase Chk1	CHEK1
Glycyrrhizae	MOL000417	Calycosin	mRNA of PKA Catalytic Subunit C-alpha	PKACA
Glycyrrhizae	MOL000417	Calycosin	Trypsin-1	PRSS1
Glycyrrhizae	MOL000417	Calycosin	Proto-oncogene serine/threonine-protein kinase Pim-1	PIM1
Glycyrrhizae	MOL000417	Calycosin	Cyclin-A2	CCNA2
Glycyrrhizae	MOL000417	Calycosin	Nuclear receptor coactivator 2	NCOA2
Glycyrrhizae	MOL000417	Calycosin	Calmodulin	CaM
Glycyrrhizae	MOL000417	Calycosin	Beta-2 adrenergic receptor	ADRB2
Glycyrrhizae	MOL000422	kaempferol	Nitric oxide synthase, inducible	NOS2
Glycyrrhizae	MOL000422	kaempferol	Prostaglandin G/H synthase 1	PTGS1
Glycyrrhizae	MOL000422	kaempferol	Androgen receptor	AR
Glycyrrhizae	MOL000422	kaempferol	Peroxisome proliferator activated receptor gamma	PPARG
Glycyrrhizae	MOL000422	kaempferol	Prostaglandin G/H synthase 2	PTGS2
Glycyrrhizae	MOL000422	kaempferol	Heat shock protein HSP 90	HSP90
Glycyrrhizae	MOL000422	kaempferol	Phosphatidylinositol-4,5-bisphosphate 3-kinase catalytic subunit, gamma isoform	PIK3CG
Glycyrrhizae	MOL000422	kaempferol	mRNA of PKA Catalytic Subunit C-alpha	PKACA
Glycyrrhizae	MOL000422	kaempferol	Nuclear receptor coactivator 2	NCOA2
Glycyrrhizae	MOL000422	kaempferol	Dipeptidyl peptidase IV	DPP4
Glycyrrhizae	MOL000422	kaempferol	Trypsin-1	PRSS1
Glycyrrhizae	MOL000422	kaempferol	Progesterone receptor	PGR
Glycyrrhizae	MOL000422	kaempferol	Thrombin	Thrombin
Glycyrrhizae	MOL000422	kaempferol	Muscarinic acetylcholine receptor M1	CHRM1
Glycyrrhizae	MOL000422	kaempferol	Nitric-oxide synthase, endothelial	NOS3
Glycyrrhizae	MOL000422	kaempferol	Gamma-aminobutyric-acid receptor alpha-2 subunit	GABRA2
Glycyrrhizae	MOL000422	kaempferol	Acetylcholinesterase	ACHE
Glycyrrhizae	MOL000422	kaempferol	Sodium-dependent noradrenaline transporter	SLC6A2
Glycyrrhizae	MOL000422	kaempferol	Muscarinic acetylcholine receptor M2	CHRM2
Glycyrrhizae	MOL000422	kaempferol	Alpha-1B adrenergic receptor	ADRA1B
Glycyrrhizae	MOL000422	kaempferol	Gamma-aminobutyric acid receptor subunit alpha-1	GABRA1
Glycyrrhizae	MOL000422	kaempferol	DNA topoisomerase II	TOP2
Glycyrrhizae	MOL000422	kaempferol	Coagulation factor VII	F7
Glycyrrhizae	MOL000422	kaempferol	Calmodulin	CaM
Glycyrrhizae	MOL000422	kaempferol	Transcription factor p65	RELA
Glycyrrhizae	MOL000422	kaempferol	Inhibitor of nuclear factor kappa-B kinase subunit beta	IKBKB
Glycyrrhizae	MOL000422	kaempferol	RAC-alpha serine/threonine-protein kinase	AKT1
Glycyrrhizae	MOL000422	kaempferol	Apoptosis regulator Bcl-2	BCL2
Glycyrrhizae	MOL000422	kaempferol	Apoptosis regulator BAX	BAX
Glycyrrhizae	MOL000422	kaempferol	Tumor necrosis factor	TNF
Glycyrrhizae	MOL000422	kaempferol	Transcription factor AP-1	JUN
Glycyrrhizae	MOL000422	kaempferol	Activator of 90 kDa heat shock protein ATPase homolog 1	AHSA1
Glycyrrhizae	MOL000422	kaempferol	Caspase-3	CASP3
Glycyrrhizae	MOL000422	kaempferol	Mitogen-activated protein kinase 8	MAPK8
Glycyrrhizae	MOL000422	kaempferol	Xanthine dehydrogenase/oxidase	XDH
Glycyrrhizae	MOL000422	kaempferol	Interstitial collagenase	MMP1
Glycyrrhizae	MOL000422	kaempferol	Signal transducer and activator of transcription 1-alpha/beta	STAT1
Glycyrrhizae	MOL000422	kaempferol	Cell division control protein 2 homolog	CDK1
Glycyrrhizae	MOL000422	kaempferol	Peroxisome proliferator-activated receptor gamma	PPARG
Glycyrrhizae	MOL000422	kaempferol	Heme oxygenase 1	HMOX1
Glycyrrhizae	MOL000422	kaempferol	Cytochrome P450 3A4	CYP3A4
Glycyrrhizae	MOL000422	kaempferol	Cytochrome P450 1A2	CYP1A2
Glycyrrhizae	MOL000422	kaempferol	Cytochrome P450 1A1	CYP1A1
Glycyrrhizae	MOL000422	kaempferol	Intercellular adhesion molecule 1	ICAM1
Glycyrrhizae	MOL000422	kaempferol	E-selectin	SELE
Glycyrrhizae	MOL000422	kaempferol	Vascular cell adhesion protein 1	VCAM1
Glycyrrhizae	MOL000422	kaempferol	Nuclear receptor subfamily 1 group I member 2	NR1I2
Glycyrrhizae	MOL000422	kaempferol	Cytochrome P450 1B1	CYP1B1
Glycyrrhizae	MOL000422	kaempferol	Arachidonate 5-lipoxygenase	ALOX5
Glycyrrhizae	MOL000422	kaempferol	Hyaluronan synthase 2	HAS2
Glycyrrhizae	MOL000422	kaempferol	Glutathione S-transferase P	GSTP1
Glycyrrhizae	MOL000422	kaempferol	Aryl hydrocarbon receptor	AHR
Glycyrrhizae	MOL000422	kaempferol	26S proteasome non-ATPase regulatory subunit 3	PSMD3
Glycyrrhizae	MOL000422	kaempferol	Solute carrier family 2, facilitated glucose transporter member 4	SLC2A4
Glycyrrhizae	MOL000422	kaempferol	Nuclear receptor subfamily 1 group I member 3	NR1I3
Glycyrrhizae	MOL000422	kaempferol	Insulin receptor	INSR
Glycyrrhizae	MOL000422	kaempferol	Type I iodothyronine deiodinase	DIO1
Glycyrrhizae	MOL000422	kaempferol	Serine/threonine-protein phosphatase 2B catalytic subunit alpha isoform	PPP3CA
Glycyrrhizae	MOL000422	kaempferol	Peroxidase C1A	PRXC1A
Glycyrrhizae	MOL000422	kaempferol	Glutathione S-transferase Mu 1	GSTM1
Glycyrrhizae	MOL000422	kaempferol	Glutathione S-transferase Mu 2	GSTM2
Glycyrrhizae	MOL000422	kaempferol	Aldo-keto reductase family 1 member C3	AKR1C3
Glycyrrhizae	MOL000422	kaempferol	Antileukoproteinase	SLPI
Glycyrrhizae	MOL004328	naringenin	Prostaglandin G/H synthase 1	PTGS1
Glycyrrhizae	MOL004328	naringenin	Estrogen receptor	ESR1
Glycyrrhizae	MOL004328	naringenin	Prostaglandin G/H synthase 2	PTGS2
Glycyrrhizae	MOL004328	naringenin	Heat shock protein HSP 90	HSP90
Glycyrrhizae	MOL004328	naringenin	Beta-lactamase	ESBL
Glycyrrhizae	MOL004328	naringenin	mRNA of PKA Catalytic Subunit C-alpha	PKACA
Glycyrrhizae	MOL004328	naringenin	Phosphatidylinositol-4,5-bisphosphate 3-kinase catalytic subunit, gamma isoform	PIK3CG
Glycyrrhizae	MOL004328	naringenin	Transcription factor p65	RELA
Glycyrrhizae	MOL004328	naringenin	RAC-alpha serine/threonine-protein kinase	AKT1
Glycyrrhizae	MOL004328	naringenin	Apoptosis regulator Bcl-2	BCL2
Glycyrrhizae	MOL004328	naringenin	Mitogen-activated protein kinase 3	MAPK3
Glycyrrhizae	MOL004328	naringenin	Mitogen-activated protein kinase 1	MAPK1
Glycyrrhizae	MOL004328	naringenin	Caspase-3	CASP3
Glycyrrhizae	MOL004328	naringenin	Fatty acid synthase	FASN
Glycyrrhizae	MOL004328	naringenin	Low-density lipoprotein receptor	LDLR
Glycyrrhizae	MOL004328	naringenin	Bcl2 antagonist of cell death	BAD
Glycyrrhizae	MOL004328	naringenin	Superoxide dismutase [Cu-Zn]	SOD1
Glycyrrhizae	MOL004328	naringenin	Catalase	CAT
Glycyrrhizae	MOL004328	naringenin	Peroxisome proliferator-activated receptor gamma	PPARG
Glycyrrhizae	MOL004328	naringenin	Microsomal triglyceride transfer protein large subunit	MTTP
Glycyrrhizae	MOL004328	naringenin	Apolipoprotein B-100	APOB
Glycyrrhizae	MOL004328	naringenin	Phospholipase B1, membrane-associated	PLB1
Glycyrrhizae	MOL004328	naringenin	3-hydroxy-3-methylglutaryl-coenzyme A reductase	HMGCR
Glycyrrhizae	MOL004328	naringenin	Cytochrome P450 19A1	CYP19A1
Glycyrrhizae	MOL004328	naringenin	Glutathione S-transferase P	GSTP1
Glycyrrhizae	MOL004328	naringenin	UDP-glucuronosyltransferase 1-1	UGT1A1
Glycyrrhizae	MOL004328	naringenin	Peroxisome proliferator-activated receptor alpha	PPARA
Glycyrrhizae	MOL004328	naringenin	Sterol regulatory element-binding protein 1	SREBF1
Glycyrrhizae	MOL004328	naringenin	Glutathione reductase, mitochondrial	GSR
Glycyrrhizae	MOL004328	naringenin	Multidrug resistance-associated protein 1	ABCC1
Glycyrrhizae	MOL004328	naringenin	Adiponectin	ADIPOQ
Glycyrrhizae	MOL004328	naringenin	Sterol O-acyltransferase 2	SOAT2
Glycyrrhizae	MOL004328	naringenin	Aldo-keto reductase family 1 member C1	AKR1C1
Glycyrrhizae	MOL004328	naringenin	Aspartate aminotransferase, cytoplasmic	GOT1
Glycyrrhizae	MOL004328	naringenin	4-aminobutyrate aminotransferase, mitochondrial	ABAT
Glycyrrhizae	MOL004328	naringenin	Liver carboxylesterase 1	CES1
Glycyrrhizae	MOL004328	naringenin	Sterol O-acyltransferase 1	SOAT1
Glycyrrhizae	MOL004805	(2S)-2-[4-hydroxy-3-(3-methylbut-2-enyl)phenyl]-8,8-dimethyl-2,3-dihydropyrano[2,3-f]chromen-4-one	Nitric oxide synthase, inducible	NOS2
Glycyrrhizae	MOL004805	(2S)-2-[4-hydroxy-3-(3-methylbut-2-enyl)phenyl]-8,8-dimethyl-2,3-dihydropyrano[2,3-f]chromen-4-one	Potassium voltage-gated channel subfamily H member 2	KCNH2
Glycyrrhizae	MOL004805	(2S)-2-[4-hydroxy-3-(3-methylbut-2-enyl)phenyl]-8,8-dimethyl-2,3-dihydropyrano[2,3-f]chromen-4-one	Estrogen receptor	ESR1
Glycyrrhizae	MOL004805	(2S)-2-[4-hydroxy-3-(3-methylbut-2-enyl)phenyl]-8,8-dimethyl-2,3-dihydropyrano[2,3-f]chromen-4-one	Androgen receptor	AR
Glycyrrhizae	MOL004805	(2S)-2-[4-hydroxy-3-(3-methylbut-2-enyl)phenyl]-8,8-dimethyl-2,3-dihydropyrano[2,3-f]chromen-4-one	Peroxisome proliferator activated receptor gamma	PPARG
Glycyrrhizae	MOL004805	(2S)-2-[4-hydroxy-3-(3-methylbut-2-enyl)phenyl]-8,8-dimethyl-2,3-dihydropyrano[2,3-f]chromen-4-one	Coagulation factor Xa	F10
Glycyrrhizae	MOL004805	(2S)-2-[4-hydroxy-3-(3-methylbut-2-enyl)phenyl]-8,8-dimethyl-2,3-dihydropyrano[2,3-f]chromen-4-one	Prostaglandin G/H synthase 2	PTGS2
Glycyrrhizae	MOL004805	(2S)-2-[4-hydroxy-3-(3-methylbut-2-enyl)phenyl]-8,8-dimethyl-2,3-dihydropyrano[2,3-f]chromen-4-one	Estrogen receptor beta	ESR2
Glycyrrhizae	MOL004805	(2S)-2-[4-hydroxy-3-(3-methylbut-2-enyl)phenyl]-8,8-dimethyl-2,3-dihydropyrano[2,3-f]chromen-4-one	Mitogen-activated protein kinase 14	MAPK14
Glycyrrhizae	MOL004805	(2S)-2-[4-hydroxy-3-(3-methylbut-2-enyl)phenyl]-8,8-dimethyl-2,3-dihydropyrano[2,3-f]chromen-4-one	Glycogen synthase kinase-3 beta	GSK3B
Glycyrrhizae	MOL004805	(2S)-2-[4-hydroxy-3-(3-methylbut-2-enyl)phenyl]-8,8-dimethyl-2,3-dihydropyrano[2,3-f]chromen-4-one	Proto-oncogene serine/threonine-protein kinase Pim-1	PIM1
Glycyrrhizae	MOL004805	(2S)-2-[4-hydroxy-3-(3-methylbut-2-enyl)phenyl]-8,8-dimethyl-2,3-dihydropyrano[2,3-f]chromen-4-one	Calmodulin	CaM
Glycyrrhizae	MOL004806	euchrenone	Nitric oxide synthase, inducible	NOS2
Glycyrrhizae	MOL004806	euchrenone	Potassium voltage-gated channel subfamily H member 2	KCNH2
Glycyrrhizae	MOL004806	euchrenone	Estrogen receptor	ESR1
Glycyrrhizae	MOL004806	euchrenone	Sodium channel protein type 5 subunit alpha	SCN5A
Glycyrrhizae	MOL004806	euchrenone	Coagulation factor Xa	F10
Glycyrrhizae	MOL004806	euchrenone	Prostaglandin G/H synthase 2	PTGS2
Glycyrrhizae	MOL004806	euchrenone	Estrogen receptor beta	ESR2
Glycyrrhizae	MOL004806	euchrenone	Beta-secretase	BACE1
Glycyrrhizae	MOL004806	euchrenone	Proto-oncogene serine/threonine-protein kinase Pim-1	PIM1
Glycyrrhizae	MOL004806	euchrenone	Calmodulin	CaM
Glycyrrhizae	MOL004808	glyasperin B	Nitric oxide synthase, inducible	NOS2
Glycyrrhizae	MOL004808	glyasperin B	Thrombin	Thrombin
Glycyrrhizae	MOL004808	glyasperin B	Estrogen receptor	ESR1
Glycyrrhizae	MOL004808	glyasperin B	Androgen receptor	AR
Glycyrrhizae	MOL004808	glyasperin B	Peroxisome proliferator activated receptor gamma	PPARG
Glycyrrhizae	MOL004808	glyasperin B	Coagulation factor Xa	F10
Glycyrrhizae	MOL004808	glyasperin B	Prostaglandin G/H synthase 2	PTGS2
Glycyrrhizae	MOL004808	glyasperin B	Coagulation factor VII	F7
Glycyrrhizae	MOL004808	glyasperin B	Vascular endothelial growth factor receptor 2	KDR
Glycyrrhizae	MOL004808	glyasperin B	Acetylcholinesterase	ACHE
Glycyrrhizae	MOL004808	glyasperin B	DNA topoisomerase II	TOP2
Glycyrrhizae	MOL004808	glyasperin B	Estrogen receptor beta	ESR2
Glycyrrhizae	MOL004808	glyasperin B	Dipeptidyl peptidase IV	DPP4
Glycyrrhizae	MOL004808	glyasperin B	Glycogen synthase kinase-3 beta	GSK3B
Glycyrrhizae	MOL004808	glyasperin B	Heat shock protein HSP 90	HSP90
Glycyrrhizae	MOL004808	glyasperin B	Cell division protein kinase 2	CDK2
Glycyrrhizae	MOL004808	glyasperin B	Trypsin-1	PRSS1
Glycyrrhizae	MOL004808	glyasperin B	Proto-oncogene serine/threonine-protein kinase Pim-1	PIM1
Glycyrrhizae	MOL004808	glyasperin B	Cyclin-A2	CCNA2
Glycyrrhizae	MOL004808	glyasperin B	Nuclear receptor coactivator 2	NCOA2
Glycyrrhizae	MOL004808	glyasperin B	Calmodulin	CaM
Glycyrrhizae	MOL004810	glyasperin F	Nitric oxide synthase, inducible	NOS2
Glycyrrhizae	MOL004810	glyasperin F	Prostaglandin G/H synthase 1	PTGS1
Glycyrrhizae	MOL004810	glyasperin F	Estrogen receptor	ESR1
Glycyrrhizae	MOL004810	glyasperin F	Androgen receptor	AR
Glycyrrhizae	MOL004810	glyasperin F	Sodium channel protein type 5 subunit alpha	SCN5A
Glycyrrhizae	MOL004810	glyasperin F	Peroxisome proliferator activated receptor gamma	PPARG
Glycyrrhizae	MOL004810	glyasperin F	Coagulation factor Xa	F10
Glycyrrhizae	MOL004810	glyasperin F	Prostaglandin G/H synthase 2	PTGS2
Glycyrrhizae	MOL004810	glyasperin F	DNA topoisomerase II	TOP2
Glycyrrhizae	MOL004810	glyasperin F	Estrogen receptor beta	ESR2
Glycyrrhizae	MOL004810	glyasperin F	Mitogen-activated protein kinase 14	MAPK14
Glycyrrhizae	MOL004810	glyasperin F	Glycogen synthase kinase-3 beta	GSK3B
Glycyrrhizae	MOL004810	glyasperin F	Heat shock protein HSP 90	HSP90
Glycyrrhizae	MOL004810	glyasperin F	Cell division protein kinase 2	CDK2
Glycyrrhizae	MOL004810	glyasperin F	Trypsin-1	PRSS1
Glycyrrhizae	MOL004810	glyasperin F	Proto-oncogene serine/threonine-protein kinase Pim-1	PIM1
Glycyrrhizae	MOL004810	glyasperin F	Cyclin-A2	CCNA2
Glycyrrhizae	MOL004810	glyasperin F	Calmodulin	CaM
Glycyrrhizae	MOL004811	Glyasperin C	Nitric oxide synthase, inducible	NOS2
Glycyrrhizae	MOL004811	Glyasperin C	Thrombin	Thrombin
Glycyrrhizae	MOL004811	Glyasperin C	Potassium voltage-gated channel subfamily H member 2	KCNH2
Glycyrrhizae	MOL004811	Glyasperin C	Estrogen receptor	ESR1
Glycyrrhizae	MOL004811	Glyasperin C	Androgen receptor	AR
Glycyrrhizae	MOL004811	Glyasperin C	Sodium channel protein type 5 subunit alpha	SCN5A
Glycyrrhizae	MOL004811	Glyasperin C	Peroxisome proliferator activated receptor gamma	PPARG
Glycyrrhizae	MOL004811	Glyasperin C	Coagulation factor Xa	F10
Glycyrrhizae	MOL004811	Glyasperin C	Prostaglandin G/H synthase 2	PTGS2
Glycyrrhizae	MOL004811	Glyasperin C	Retinoic acid receptor RXR-alpha	RXRA
Glycyrrhizae	MOL004811	Glyasperin C	Acetylcholinesterase	ACHE
Glycyrrhizae	MOL004811	Glyasperin C	DNA topoisomerase II	TOP2
Glycyrrhizae	MOL004811	Glyasperin C	Estrogen receptor beta	ESR2
Glycyrrhizae	MOL004811	Glyasperin C	Dipeptidyl peptidase IV	DPP4
Glycyrrhizae	MOL004811	Glyasperin C	Mitogen-activated protein kinase 14	MAPK14
Glycyrrhizae	MOL004811	Glyasperin C	Glycogen synthase kinase-3 beta	GSK3B
Glycyrrhizae	MOL004811	Glyasperin C	Heat shock protein HSP 90	HSP90
Glycyrrhizae	MOL004811	Glyasperin C	Cell division protein kinase 2	CDK2
Glycyrrhizae	MOL004811	Glyasperin C	Serine/threonine-protein kinase Chk1	CHEK1
Glycyrrhizae	MOL004811	Glyasperin C	Trypsin-1	PRSS1
Glycyrrhizae	MOL004811	Glyasperin C	Proto-oncogene serine/threonine-protein kinase Pim-1	PIM1
Glycyrrhizae	MOL004811	Glyasperin C	Cyclin-A2	CCNA2
Glycyrrhizae	MOL004811	Glyasperin C	Nuclear receptor coactivator 2	NCOA2
Glycyrrhizae	MOL004811	Glyasperin C	Calmodulin	CaM
Glycyrrhizae	MOL004814	Isotrifoliol	Nitric oxide synthase, inducible	NOS2
Glycyrrhizae	MOL004814	Isotrifoliol	Estrogen receptor	ESR1
Glycyrrhizae	MOL004814	Isotrifoliol	Androgen receptor	AR
Glycyrrhizae	MOL004814	Isotrifoliol	Prostaglandin G/H synthase 2	PTGS2
Glycyrrhizae	MOL004814	Isotrifoliol	Estrogen receptor beta	ESR2
Glycyrrhizae	MOL004814	Isotrifoliol	Mitogen-activated protein kinase 14	MAPK14
Glycyrrhizae	MOL004814	Isotrifoliol	Glycogen synthase kinase-3 beta	GSK3B
Glycyrrhizae	MOL004814	Isotrifoliol	Heat shock protein HSP 90	HSP90
Glycyrrhizae	MOL004814	Isotrifoliol	Cell division protein kinase 2	CDK2
Glycyrrhizae	MOL004814	Isotrifoliol	Phosphatidylinositol-4,5-bisphosphate 3-kinase catalytic subunit, gamma isoform	PIK3CG
Glycyrrhizae	MOL004814	Isotrifoliol	Serine/threonine-protein kinase Chk1	CHEK1
Glycyrrhizae	MOL004814	Isotrifoliol	mRNA of PKA Catalytic Subunit C-alpha	PKACA
Glycyrrhizae	MOL004814	Isotrifoliol	Proto-oncogene serine/threonine-protein kinase Pim-1	PIM1
Glycyrrhizae	MOL004814	Isotrifoliol	Cyclin-A2	CCNA2
Glycyrrhizae	MOL004815	(E)-1-(2,4-dihydroxyphenyl)-3-(2,2-dimethylchromen-6-yl)prop-2-en-1-one	Nitric oxide synthase, inducible	NOS2
Glycyrrhizae	MOL004815	(E)-1-(2,4-dihydroxyphenyl)-3-(2,2-dimethylchromen-6-yl)prop-2-en-1-one	Prostaglandin G/H synthase 1	PTGS1
Glycyrrhizae	MOL004815	(E)-1-(2,4-dihydroxyphenyl)-3-(2,2-dimethylchromen-6-yl)prop-2-en-1-one	Estrogen receptor	ESR1
Glycyrrhizae	MOL004815	(E)-1-(2,4-dihydroxyphenyl)-3-(2,2-dimethylchromen-6-yl)prop-2-en-1-one	Androgen receptor	AR
Glycyrrhizae	MOL004815	(E)-1-(2,4-dihydroxyphenyl)-3-(2,2-dimethylchromen-6-yl)prop-2-en-1-one	Sodium channel protein type 5 subunit alpha	SCN5A
Glycyrrhizae	MOL004815	(E)-1-(2,4-dihydroxyphenyl)-3-(2,2-dimethylchromen-6-yl)prop-2-en-1-one	Peroxisome proliferator activated receptor gamma	PPARG
Glycyrrhizae	MOL004815	(E)-1-(2,4-dihydroxyphenyl)-3-(2,2-dimethylchromen-6-yl)prop-2-en-1-one	Coagulation factor Xa	F10
Glycyrrhizae	MOL004815	(E)-1-(2,4-dihydroxyphenyl)-3-(2,2-dimethylchromen-6-yl)prop-2-en-1-one	Prostaglandin G/H synthase 2	PTGS2
Glycyrrhizae	MOL004815	(E)-1-(2,4-dihydroxyphenyl)-3-(2,2-dimethylchromen-6-yl)prop-2-en-1-one	Carbonic anhydrase II	CA2
Glycyrrhizae	MOL004815	(E)-1-(2,4-dihydroxyphenyl)-3-(2,2-dimethylchromen-6-yl)prop-2-en-1-one	Retinoic acid receptor RXR-alpha	RXRA
Glycyrrhizae	MOL004815	(E)-1-(2,4-dihydroxyphenyl)-3-(2,2-dimethylchromen-6-yl)prop-2-en-1-one	Alpha-1B adrenergic receptor	ADRA1B
Glycyrrhizae	MOL004815	(E)-1-(2,4-dihydroxyphenyl)-3-(2,2-dimethylchromen-6-yl)prop-2-en-1-one	Estrogen receptor beta	ESR2
Glycyrrhizae	MOL004815	(E)-1-(2,4-dihydroxyphenyl)-3-(2,2-dimethylchromen-6-yl)prop-2-en-1-one	Mitogen-activated protein kinase 14	MAPK14
Glycyrrhizae	MOL004815	(E)-1-(2,4-dihydroxyphenyl)-3-(2,2-dimethylchromen-6-yl)prop-2-en-1-one	Glycogen synthase kinase-3 beta	GSK3B
Glycyrrhizae	MOL004815	(E)-1-(2,4-dihydroxyphenyl)-3-(2,2-dimethylchromen-6-yl)prop-2-en-1-one	Cell division protein kinase 2	CDK2
Glycyrrhizae	MOL004815	(E)-1-(2,4-dihydroxyphenyl)-3-(2,2-dimethylchromen-6-yl)prop-2-en-1-one	Serine/threonine-protein kinase Chk1	CHEK1
Glycyrrhizae	MOL004815	(E)-1-(2,4-dihydroxyphenyl)-3-(2,2-dimethylchromen-6-yl)prop-2-en-1-one	Proto-oncogene serine/threonine-protein kinase Pim-1	PIM1
Glycyrrhizae	MOL004815	(E)-1-(2,4-dihydroxyphenyl)-3-(2,2-dimethylchromen-6-yl)prop-2-en-1-one	Cyclin-A2	CCNA2
Glycyrrhizae	MOL004815	(E)-1-(2,4-dihydroxyphenyl)-3-(2,2-dimethylchromen-6-yl)prop-2-en-1-one	Nuclear receptor coactivator 2	NCOA2
Glycyrrhizae	MOL004815	(E)-1-(2,4-dihydroxyphenyl)-3-(2,2-dimethylchromen-6-yl)prop-2-en-1-one	Calmodulin	CaM
Glycyrrhizae	MOL004820	kanzonols W	Nitric oxide synthase, inducible	NOS2
Glycyrrhizae	MOL004820	kanzonols W	Prostaglandin G/H synthase 1	PTGS1
Glycyrrhizae	MOL004820	kanzonols W	Estrogen receptor	ESR1
Glycyrrhizae	MOL004820	kanzonols W	Androgen receptor	AR
Glycyrrhizae	MOL004820	kanzonols W	Sodium channel protein type 5 subunit alpha	SCN5A
Glycyrrhizae	MOL004820	kanzonols W	Peroxisome proliferator activated receptor gamma	PPARG
Glycyrrhizae	MOL004820	kanzonols W	Coagulation factor Xa	F10
Glycyrrhizae	MOL004820	kanzonols W	Prostaglandin G/H synthase 2	PTGS2
Glycyrrhizae	MOL004820	kanzonols W	Retinoic acid receptor RXR-alpha	RXRA
Glycyrrhizae	MOL004820	kanzonols W	DNA topoisomerase II	TOP2
Glycyrrhizae	MOL004820	kanzonols W	Estrogen receptor beta	ESR2
Glycyrrhizae	MOL004820	kanzonols W	Mitogen-activated protein kinase 14	MAPK14
Glycyrrhizae	MOL004820	kanzonols W	Glycogen synthase kinase-3 beta	GSK3B
Glycyrrhizae	MOL004820	kanzonols W	Cell division protein kinase 2	CDK2
Glycyrrhizae	MOL004820	kanzonols W	Serine/threonine-protein kinase Chk1	CHEK1
Glycyrrhizae	MOL004820	kanzonols W	Trypsin-1	PRSS1
Glycyrrhizae	MOL004820	kanzonols W	Proto-oncogene serine/threonine-protein kinase Pim-1	PIM1
Glycyrrhizae	MOL004820	kanzonols W	Cyclin-A2	CCNA2
Glycyrrhizae	MOL004820	kanzonols W	Nuclear receptor coactivator 2	NCOA2
Glycyrrhizae	MOL004820	kanzonols W	Nuclear receptor coactivator 1	NCOA1
Glycyrrhizae	MOL004820	kanzonols W	Calmodulin	CaM
Glycyrrhizae	MOL004824	(2S)-6-(2,4-dihydroxyphenyl)-2-(2-hydroxypropan-2-yl)-4-methoxy-2,3-dihydrofuro[3,2-g]chromen-7-one	Nitric oxide synthase, inducible	NOS2
Glycyrrhizae	MOL004824	(2S)-6-(2,4-dihydroxyphenyl)-2-(2-hydroxypropan-2-yl)-4-methoxy-2,3-dihydrofuro[3,2-g]chromen-7-one	Thrombin	Thrombin
Glycyrrhizae	MOL004824	(2S)-6-(2,4-dihydroxyphenyl)-2-(2-hydroxypropan-2-yl)-4-methoxy-2,3-dihydrofuro[3,2-g]chromen-7-one	Estrogen receptor	ESR1
Glycyrrhizae	MOL004824	(2S)-6-(2,4-dihydroxyphenyl)-2-(2-hydroxypropan-2-yl)-4-methoxy-2,3-dihydrofuro[3,2-g]chromen-7-one	Androgen receptor	AR
Glycyrrhizae	MOL004824	(2S)-6-(2,4-dihydroxyphenyl)-2-(2-hydroxypropan-2-yl)-4-methoxy-2,3-dihydrofuro[3,2-g]chromen-7-one	Peroxisome proliferator activated receptor gamma	PPARG
Glycyrrhizae	MOL004824	(2S)-6-(2,4-dihydroxyphenyl)-2-(2-hydroxypropan-2-yl)-4-methoxy-2,3-dihydrofuro[3,2-g]chromen-7-one	Coagulation factor Xa	F10
Glycyrrhizae	MOL004824	(2S)-6-(2,4-dihydroxyphenyl)-2-(2-hydroxypropan-2-yl)-4-methoxy-2,3-dihydrofuro[3,2-g]chromen-7-one	Prostaglandin G/H synthase 2	PTGS2
Glycyrrhizae	MOL004824	(2S)-6-(2,4-dihydroxyphenyl)-2-(2-hydroxypropan-2-yl)-4-methoxy-2,3-dihydrofuro[3,2-g]chromen-7-one	Coagulation factor VII	F7
Glycyrrhizae	MOL004824	(2S)-6-(2,4-dihydroxyphenyl)-2-(2-hydroxypropan-2-yl)-4-methoxy-2,3-dihydrofuro[3,2-g]chromen-7-one	Vascular endothelial growth factor receptor 2	KDR
Glycyrrhizae	MOL004824	(2S)-6-(2,4-dihydroxyphenyl)-2-(2-hydroxypropan-2-yl)-4-methoxy-2,3-dihydrofuro[3,2-g]chromen-7-one	Acetylcholinesterase	ACHE
Glycyrrhizae	MOL004824	(2S)-6-(2,4-dihydroxyphenyl)-2-(2-hydroxypropan-2-yl)-4-methoxy-2,3-dihydrofuro[3,2-g]chromen-7-one	DNA topoisomerase II	TOP2
Glycyrrhizae	MOL004824	(2S)-6-(2,4-dihydroxyphenyl)-2-(2-hydroxypropan-2-yl)-4-methoxy-2,3-dihydrofuro[3,2-g]chromen-7-one	Estrogen receptor beta	ESR2
Glycyrrhizae	MOL004824	(2S)-6-(2,4-dihydroxyphenyl)-2-(2-hydroxypropan-2-yl)-4-methoxy-2,3-dihydrofuro[3,2-g]chromen-7-one	Dipeptidyl peptidase IV	DPP4
Glycyrrhizae	MOL004824	(2S)-6-(2,4-dihydroxyphenyl)-2-(2-hydroxypropan-2-yl)-4-methoxy-2,3-dihydrofuro[3,2-g]chromen-7-one	Mitogen-activated protein kinase 14	MAPK14
Glycyrrhizae	MOL004824	(2S)-6-(2,4-dihydroxyphenyl)-2-(2-hydroxypropan-2-yl)-4-methoxy-2,3-dihydrofuro[3,2-g]chromen-7-one	Glycogen synthase kinase-3 beta	GSK3B
Glycyrrhizae	MOL004824	(2S)-6-(2,4-dihydroxyphenyl)-2-(2-hydroxypropan-2-yl)-4-methoxy-2,3-dihydrofuro[3,2-g]chromen-7-one	Cell division protein kinase 2	CDK2
Glycyrrhizae	MOL004824	(2S)-6-(2,4-dihydroxyphenyl)-2-(2-hydroxypropan-2-yl)-4-methoxy-2,3-dihydrofuro[3,2-g]chromen-7-one	Serine/threonine-protein kinase Chk1	CHEK1
Glycyrrhizae	MOL004824	(2S)-6-(2,4-dihydroxyphenyl)-2-(2-hydroxypropan-2-yl)-4-methoxy-2,3-dihydrofuro[3,2-g]chromen-7-one	Trypsin-1	PRSS1
Glycyrrhizae	MOL004824	(2S)-6-(2,4-dihydroxyphenyl)-2-(2-hydroxypropan-2-yl)-4-methoxy-2,3-dihydrofuro[3,2-g]chromen-7-one	Proto-oncogene serine/threonine-protein kinase Pim-1	PIM1
Glycyrrhizae	MOL004824	(2S)-6-(2,4-dihydroxyphenyl)-2-(2-hydroxypropan-2-yl)-4-methoxy-2,3-dihydrofuro[3,2-g]chromen-7-one	Cyclin-A2	CCNA2
Glycyrrhizae	MOL004824	(2S)-6-(2,4-dihydroxyphenyl)-2-(2-hydroxypropan-2-yl)-4-methoxy-2,3-dihydrofuro[3,2-g]chromen-7-one	Calmodulin	CaM
Glycyrrhizae	MOL004827	Semilicoisoflavone B	Nitric oxide synthase, inducible	NOS2
Glycyrrhizae	MOL004827	Semilicoisoflavone B	Thrombin	Thrombin
Glycyrrhizae	MOL004827	Semilicoisoflavone B	Estrogen receptor	ESR1
Glycyrrhizae	MOL004827	Semilicoisoflavone B	Androgen receptor	AR
Glycyrrhizae	MOL004827	Semilicoisoflavone B	Sodium channel protein type 5 subunit alpha	SCN5A
Glycyrrhizae	MOL004827	Semilicoisoflavone B	Peroxisome proliferator activated receptor gamma	PPARG
Glycyrrhizae	MOL004827	Semilicoisoflavone B	Coagulation factor Xa	F10
Glycyrrhizae	MOL004827	Semilicoisoflavone B	Prostaglandin G/H synthase 2	PTGS2
Glycyrrhizae	MOL004827	Semilicoisoflavone B	Coagulation factor VII	F7
Glycyrrhizae	MOL004827	Semilicoisoflavone B	Acetylcholinesterase	ACHE
Glycyrrhizae	MOL004827	Semilicoisoflavone B	DNA topoisomerase II	TOP2
Glycyrrhizae	MOL004827	Semilicoisoflavone B	Glycogen synthase kinase-3 beta	GSK3B
Glycyrrhizae	MOL004827	Semilicoisoflavone B	Heat shock protein HSP 90	HSP90
Glycyrrhizae	MOL004827	Semilicoisoflavone B	Cell division protein kinase 2	CDK2
Glycyrrhizae	MOL004827	Semilicoisoflavone B	Serine/threonine-protein kinase Chk1	CHEK1
Glycyrrhizae	MOL004827	Semilicoisoflavone B	Trypsin-1	PRSS1
Glycyrrhizae	MOL004827	Semilicoisoflavone B	Calmodulin	CaM
Glycyrrhizae	MOL004828	Glepidotin A	Nitric oxide synthase, inducible	NOS2
Glycyrrhizae	MOL004828	Glepidotin A	Prostaglandin G/H synthase 1	PTGS1
Glycyrrhizae	MOL004828	Glepidotin A	Thrombin	Thrombin
Glycyrrhizae	MOL004828	Glepidotin A	Estrogen receptor	ESR1
Glycyrrhizae	MOL004828	Glepidotin A	Androgen receptor	AR
Glycyrrhizae	MOL004828	Glepidotin A	Sodium channel protein type 5 subunit alpha	SCN5A
Glycyrrhizae	MOL004828	Glepidotin A	Peroxisome proliferator activated receptor gamma	PPARG
Glycyrrhizae	MOL004828	Glepidotin A	Coagulation factor Xa	F10
Glycyrrhizae	MOL004828	Glepidotin A	Prostaglandin G/H synthase 2	PTGS2
Glycyrrhizae	MOL004828	Glepidotin A	Nitric-oxide synthase, endothelial	NOS3
Glycyrrhizae	MOL004828	Glepidotin A	Coagulation factor VII	F7
Glycyrrhizae	MOL004828	Glepidotin A	Vascular endothelial growth factor receptor 2	KDR
Glycyrrhizae	MOL004828	Glepidotin A	Retinoic acid receptor RXR-alpha	RXRA
Glycyrrhizae	MOL004828	Glepidotin A	CGMP-inhibited 3',5'-cyclic phosphodiesterase A	PDE3A
Glycyrrhizae	MOL004828	Glepidotin A	DNA topoisomerase II	TOP2
Glycyrrhizae	MOL004828	Glepidotin A	Dipeptidyl peptidase IV	DPP4
Glycyrrhizae	MOL004828	Glepidotin A	Mitogen-activated protein kinase 14	MAPK14
Glycyrrhizae	MOL004828	Glepidotin A	Glycogen synthase kinase-3 beta	GSK3B
Glycyrrhizae	MOL004828	Glepidotin A	Heat shock protein HSP 90	HSP90
Glycyrrhizae	MOL004828	Glepidotin A	Cell division protein kinase 2	CDK2
Glycyrrhizae	MOL004828	Glepidotin A	Serine/threonine-protein kinase Chk1	CHEK1
Glycyrrhizae	MOL004828	Glepidotin A	Ig gamma-1 chain C region	Ighg1
Glycyrrhizae	MOL004828	Glepidotin A	Trypsin-1	PRSS1
Glycyrrhizae	MOL004828	Glepidotin A	Proto-oncogene serine/threonine-protein kinase Pim-1	PIM1
Glycyrrhizae	MOL004828	Glepidotin A	Cyclin-A2	CCNA2
Glycyrrhizae	MOL004828	Glepidotin A	Calmodulin	CaM
Glycyrrhizae	MOL004833	Phaseolinisoflavan	Nitric oxide synthase, inducible	NOS2
Glycyrrhizae	MOL004833	Phaseolinisoflavan	Muscarinic acetylcholine receptor M1	CHRM1
Glycyrrhizae	MOL004833	Phaseolinisoflavan	Estrogen receptor	ESR1
Glycyrrhizae	MOL004833	Phaseolinisoflavan	Androgen receptor	AR
Glycyrrhizae	MOL004833	Phaseolinisoflavan	Sodium channel protein type 5 subunit alpha	SCN5A
Glycyrrhizae	MOL004833	Phaseolinisoflavan	Peroxisome proliferator activated receptor gamma	PPARG
Glycyrrhizae	MOL004833	Phaseolinisoflavan	Coagulation factor Xa	F10
Glycyrrhizae	MOL004833	Phaseolinisoflavan	Prostaglandin G/H synthase 2	PTGS2
Glycyrrhizae	MOL004833	Phaseolinisoflavan	Retinoic acid receptor RXR-alpha	RXRA
Glycyrrhizae	MOL004833	Phaseolinisoflavan	Acetylcholinesterase	ACHE
Glycyrrhizae	MOL004833	Phaseolinisoflavan	Alpha-1B adrenergic receptor	ADRA1B
Glycyrrhizae	MOL004833	Phaseolinisoflavan	Beta-2 adrenergic receptor	ADRB2
Glycyrrhizae	MOL004833	Phaseolinisoflavan	Estrogen receptor beta	ESR2
Glycyrrhizae	MOL004833	Phaseolinisoflavan	Mitogen-activated protein kinase 14	MAPK14
Glycyrrhizae	MOL004833	Phaseolinisoflavan	Glycogen synthase kinase-3 beta	GSK3B
Glycyrrhizae	MOL004833	Phaseolinisoflavan	Cell division protein kinase 2	CDK2
Glycyrrhizae	MOL004833	Phaseolinisoflavan	Serine/threonine-protein kinase Chk1	CHEK1
Glycyrrhizae	MOL004833	Phaseolinisoflavan	Trypsin-1	PRSS1
Glycyrrhizae	MOL004833	Phaseolinisoflavan	Proto-oncogene serine/threonine-protein kinase Pim-1	PIM1
Glycyrrhizae	MOL004833	Phaseolinisoflavan	Cyclin-A2	CCNA2
Glycyrrhizae	MOL004833	Phaseolinisoflavan	Nuclear receptor coactivator 1	NCOA1
Glycyrrhizae	MOL004833	Phaseolinisoflavan	Calmodulin	CaM
Glycyrrhizae	MOL004835	Glypallichalcone	Nitric oxide synthase, inducible	NOS2
Glycyrrhizae	MOL004835	Glypallichalcone	Prostaglandin G/H synthase 1	PTGS1
Glycyrrhizae	MOL004835	Glypallichalcone	Muscarinic acetylcholine receptor M1	CHRM1
Glycyrrhizae	MOL004835	Glypallichalcone	Estrogen receptor	ESR1
Glycyrrhizae	MOL004835	Glypallichalcone	Androgen receptor	AR
Glycyrrhizae	MOL004835	Glypallichalcone	Sodium channel protein type 5 subunit alpha	SCN5A
Glycyrrhizae	MOL004835	Glypallichalcone	Peroxisome proliferator activated receptor gamma	PPARG
Glycyrrhizae	MOL004835	Glypallichalcone	Prostaglandin G/H synthase 2	PTGS2
Glycyrrhizae	MOL004835	Glypallichalcone	Carbonic anhydrase II	CA2
Glycyrrhizae	MOL004835	Glypallichalcone	CGMP-inhibited 3',5'-cyclic phosphodiesterase A	PDE3A
Glycyrrhizae	MOL004835	Glypallichalcone	Alpha-1B adrenergic receptor	ADRA1B
Glycyrrhizae	MOL004835	Glypallichalcone	Sodium-dependent dopamine transporter	SLC6A3
Glycyrrhizae	MOL004835	Glypallichalcone	Beta-2 adrenergic receptor	ADRB2
Glycyrrhizae	MOL004835	Glypallichalcone	Sodium-dependent serotonin transporter	SLC6A4
Glycyrrhizae	MOL004835	Glypallichalcone	Estrogen receptor beta	ESR2
Glycyrrhizae	MOL004835	Glypallichalcone	Mitogen-activated protein kinase 14	MAPK14
Glycyrrhizae	MOL004835	Glypallichalcone	Glycogen synthase kinase-3 beta	GSK3B
Glycyrrhizae	MOL004835	Glypallichalcone	Heat shock protein HSP 90	HSP90
Glycyrrhizae	MOL004835	Glypallichalcone	Cell division protein kinase 2	CDK2
Glycyrrhizae	MOL004835	Glypallichalcone	Leukotriene A-4 hydrolase	LTA4H
Glycyrrhizae	MOL004835	Glypallichalcone	Amine oxidase [flavin-containing] B	MAOB
Glycyrrhizae	MOL004835	Glypallichalcone	Serine/threonine-protein kinase Chk1	CHEK1
Glycyrrhizae	MOL004835	Glypallichalcone	mRNA of PKA Catalytic Subunit C-alpha	PKACA
Glycyrrhizae	MOL004835	Glypallichalcone	Cyclin-A2	CCNA2
Glycyrrhizae	MOL004835	Glypallichalcone	Nuclear receptor coactivator 1	NCOA1
Glycyrrhizae	MOL004835	Glypallichalcone	cAMP-dependent protein kinase inhibitor alpha	PKIA
Glycyrrhizae	MOL004835	Glypallichalcone	Calmodulin	CaM
Glycyrrhizae	MOL004838	8-(6-hydroxy-2-benzofuranyl)-2,2-dimethyl-5-chromenol	Nitric oxide synthase, inducible	NOS2
Glycyrrhizae	MOL004838	8-(6-hydroxy-2-benzofuranyl)-2,2-dimethyl-5-chromenol	Estrogen receptor	ESR1
Glycyrrhizae	MOL004838	8-(6-hydroxy-2-benzofuranyl)-2,2-dimethyl-5-chromenol	Prostaglandin G/H synthase 2	PTGS2
Glycyrrhizae	MOL004838	8-(6-hydroxy-2-benzofuranyl)-2,2-dimethyl-5-chromenol	Retinoic acid receptor RXR-alpha	RXRA
Glycyrrhizae	MOL004838	8-(6-hydroxy-2-benzofuranyl)-2,2-dimethyl-5-chromenol	Heat shock protein HSP 90	HSP90
Glycyrrhizae	MOL004838	8-(6-hydroxy-2-benzofuranyl)-2,2-dimethyl-5-chromenol	Phosphatidylinositol-4,5-bisphosphate 3-kinase catalytic subunit, gamma isoform	PIK3CG
Glycyrrhizae	MOL004841	Licochalcone B	Nitric oxide synthase, inducible	NOS2
Glycyrrhizae	MOL004841	Licochalcone B	Prostaglandin G/H synthase 1	PTGS1
Glycyrrhizae	MOL004841	Licochalcone B	Estrogen receptor	ESR1
Glycyrrhizae	MOL004841	Licochalcone B	Androgen receptor	AR
Glycyrrhizae	MOL004841	Licochalcone B	Peroxisome proliferator activated receptor gamma	PPARG
Glycyrrhizae	MOL004841	Licochalcone B	Prostaglandin G/H synthase 2	PTGS2
Glycyrrhizae	MOL004841	Licochalcone B	Carbonic anhydrase II	CA2
Glycyrrhizae	MOL004841	Licochalcone B	CGMP-inhibited 3',5'-cyclic phosphodiesterase A	PDE3A
Glycyrrhizae	MOL004841	Licochalcone B	Beta-2 adrenergic receptor	ADRB2
Glycyrrhizae	MOL004841	Licochalcone B	Estrogen receptor beta	ESR2
Glycyrrhizae	MOL004841	Licochalcone B	Mitogen-activated protein kinase 14	MAPK14
Glycyrrhizae	MOL004841	Licochalcone B	Glycogen synthase kinase-3 beta	GSK3B
Glycyrrhizae	MOL004841	Licochalcone B	Heat shock protein HSP 90	HSP90
Glycyrrhizae	MOL004841	Licochalcone B	Cell division protein kinase 2	CDK2
Glycyrrhizae	MOL004841	Licochalcone B	Serine/threonine-protein kinase Chk1	CHEK1
Glycyrrhizae	MOL004841	Licochalcone B	mRNA of PKA Catalytic Subunit C-alpha	PKACA
Glycyrrhizae	MOL004841	Licochalcone B	Proto-oncogene serine/threonine-protein kinase Pim-1	PIM1
Glycyrrhizae	MOL004841	Licochalcone B	Cyclin-A2	CCNA2
Glycyrrhizae	MOL004841	Licochalcone B	Calmodulin	CaM
Glycyrrhizae	MOL004848	licochalcone G	Nitric oxide synthase, inducible	NOS2
Glycyrrhizae	MOL004848	licochalcone G	Estrogen receptor	ESR1
Glycyrrhizae	MOL004848	licochalcone G	Androgen receptor	AR
Glycyrrhizae	MOL004848	licochalcone G	Peroxisome proliferator activated receptor gamma	PPARG
Glycyrrhizae	MOL004848	licochalcone G	Coagulation factor Xa	F10
Glycyrrhizae	MOL004848	licochalcone G	Prostaglandin G/H synthase 2	PTGS2
Glycyrrhizae	MOL004848	licochalcone G	Vascular endothelial growth factor receptor 2	KDR
Glycyrrhizae	MOL004848	licochalcone G	Estrogen receptor beta	ESR2
Glycyrrhizae	MOL004848	licochalcone G	Mitogen-activated protein kinase 14	MAPK14
Glycyrrhizae	MOL004848	licochalcone G	Glycogen synthase kinase-3 beta	GSK3B
Glycyrrhizae	MOL004848	licochalcone G	Heat shock protein HSP 90	HSP90
Glycyrrhizae	MOL004848	licochalcone G	Cell division protein kinase 2	CDK2
Glycyrrhizae	MOL004848	licochalcone G	Ig gamma-1 chain C region	Ighg1
Glycyrrhizae	MOL004848	licochalcone G	Proto-oncogene serine/threonine-protein kinase Pim-1	PIM1
Glycyrrhizae	MOL004848	licochalcone G	Cyclin-A2	CCNA2
Glycyrrhizae	MOL004848	licochalcone G	Nuclear receptor coactivator 2	NCOA2
Glycyrrhizae	MOL004848	licochalcone G	Calmodulin	CaM
Glycyrrhizae	MOL004849	3-(2,4-dihydroxyphenyl)-8-(1,1-dimethylprop-2-enyl)-7-hydroxy-5-methoxy-coumarin	Nitric oxide synthase, inducible	NOS2
Glycyrrhizae	MOL004849	3-(2,4-dihydroxyphenyl)-8-(1,1-dimethylprop-2-enyl)-7-hydroxy-5-methoxy-coumarin	Thrombin	Thrombin
Glycyrrhizae	MOL004849	3-(2,4-dihydroxyphenyl)-8-(1,1-dimethylprop-2-enyl)-7-hydroxy-5-methoxy-coumarin	Potassium voltage-gated channel subfamily H member 2	KCNH2
Glycyrrhizae	MOL004849	3-(2,4-dihydroxyphenyl)-8-(1,1-dimethylprop-2-enyl)-7-hydroxy-5-methoxy-coumarin	Estrogen receptor	ESR1
Glycyrrhizae	MOL004849	3-(2,4-dihydroxyphenyl)-8-(1,1-dimethylprop-2-enyl)-7-hydroxy-5-methoxy-coumarin	Androgen receptor	AR
Glycyrrhizae	MOL004849	3-(2,4-dihydroxyphenyl)-8-(1,1-dimethylprop-2-enyl)-7-hydroxy-5-methoxy-coumarin	Peroxisome proliferator activated receptor gamma	PPARG
Glycyrrhizae	MOL004849	3-(2,4-dihydroxyphenyl)-8-(1,1-dimethylprop-2-enyl)-7-hydroxy-5-methoxy-coumarin	Coagulation factor Xa	F10
Glycyrrhizae	MOL004849	3-(2,4-dihydroxyphenyl)-8-(1,1-dimethylprop-2-enyl)-7-hydroxy-5-methoxy-coumarin	Prostaglandin G/H synthase 2	PTGS2
Glycyrrhizae	MOL004849	3-(2,4-dihydroxyphenyl)-8-(1,1-dimethylprop-2-enyl)-7-hydroxy-5-methoxy-coumarin	Coagulation factor VII	F7
Glycyrrhizae	MOL004849	3-(2,4-dihydroxyphenyl)-8-(1,1-dimethylprop-2-enyl)-7-hydroxy-5-methoxy-coumarin	Vascular endothelial growth factor receptor 2	KDR
Glycyrrhizae	MOL004849	3-(2,4-dihydroxyphenyl)-8-(1,1-dimethylprop-2-enyl)-7-hydroxy-5-methoxy-coumarin	DNA topoisomerase II	TOP2
Glycyrrhizae	MOL004849	3-(2,4-dihydroxyphenyl)-8-(1,1-dimethylprop-2-enyl)-7-hydroxy-5-methoxy-coumarin	Estrogen receptor beta	ESR2
Glycyrrhizae	MOL004849	3-(2,4-dihydroxyphenyl)-8-(1,1-dimethylprop-2-enyl)-7-hydroxy-5-methoxy-coumarin	Dipeptidyl peptidase IV	DPP4
Glycyrrhizae	MOL004849	3-(2,4-dihydroxyphenyl)-8-(1,1-dimethylprop-2-enyl)-7-hydroxy-5-methoxy-coumarin	Mitogen-activated protein kinase 14	MAPK14
Glycyrrhizae	MOL004849	3-(2,4-dihydroxyphenyl)-8-(1,1-dimethylprop-2-enyl)-7-hydroxy-5-methoxy-coumarin	Glycogen synthase kinase-3 beta	GSK3B
Glycyrrhizae	MOL004849	3-(2,4-dihydroxyphenyl)-8-(1,1-dimethylprop-2-enyl)-7-hydroxy-5-methoxy-coumarin	Heat shock protein HSP 90	HSP90
Glycyrrhizae	MOL004849	3-(2,4-dihydroxyphenyl)-8-(1,1-dimethylprop-2-enyl)-7-hydroxy-5-methoxy-coumarin	Cell division protein kinase 2	CDK2
Glycyrrhizae	MOL004849	3-(2,4-dihydroxyphenyl)-8-(1,1-dimethylprop-2-enyl)-7-hydroxy-5-methoxy-coumarin	Serine/threonine-protein kinase Chk1	CHEK1
Glycyrrhizae	MOL004849	3-(2,4-dihydroxyphenyl)-8-(1,1-dimethylprop-2-enyl)-7-hydroxy-5-methoxy-coumarin	Trypsin-1	PRSS1
Glycyrrhizae	MOL004849	3-(2,4-dihydroxyphenyl)-8-(1,1-dimethylprop-2-enyl)-7-hydroxy-5-methoxy-coumarin	Proto-oncogene serine/threonine-protein kinase Pim-1	PIM1
Glycyrrhizae	MOL004849	3-(2,4-dihydroxyphenyl)-8-(1,1-dimethylprop-2-enyl)-7-hydroxy-5-methoxy-coumarin	Nuclear receptor coactivator 2	NCOA2
Glycyrrhizae	MOL004849	3-(2,4-dihydroxyphenyl)-8-(1,1-dimethylprop-2-enyl)-7-hydroxy-5-methoxy-coumarin	Nuclear receptor coactivator 1	NCOA1
Glycyrrhizae	MOL004849	3-(2,4-dihydroxyphenyl)-8-(1,1-dimethylprop-2-enyl)-7-hydroxy-5-methoxy-coumarin	Calmodulin	CaM
Glycyrrhizae	MOL004855	Licoricone	Nitric oxide synthase, inducible	NOS2
Glycyrrhizae	MOL004855	Licoricone	Thrombin	Thrombin
Glycyrrhizae	MOL004855	Licoricone	Potassium voltage-gated channel subfamily H member 2	KCNH2
Glycyrrhizae	MOL004855	Licoricone	Estrogen receptor	ESR1
Glycyrrhizae	MOL004855	Licoricone	Androgen receptor	AR
Glycyrrhizae	MOL004855	Licoricone	Peroxisome proliferator activated receptor gamma	PPARG
Glycyrrhizae	MOL004855	Licoricone	Coagulation factor Xa	F10
Glycyrrhizae	MOL004855	Licoricone	Prostaglandin G/H synthase 2	PTGS2
Glycyrrhizae	MOL004855	Licoricone	Vascular endothelial growth factor receptor 2	KDR
Glycyrrhizae	MOL004855	Licoricone	DNA topoisomerase II	TOP2
Glycyrrhizae	MOL004855	Licoricone	Serine/threonine-protein kinase Chk1	CHEK1
Glycyrrhizae	MOL004855	Licoricone	Trypsin-1	PRSS1
Glycyrrhizae	MOL004855	Licoricone	Proto-oncogene serine/threonine-protein kinase Pim-1	PIM1
Glycyrrhizae	MOL004855	Licoricone	Nuclear receptor coactivator 2	NCOA2
Glycyrrhizae	MOL004855	Licoricone	Calmodulin	CaM
Glycyrrhizae	MOL004856	Gancaonin A	Nitric oxide synthase, inducible	NOS2
Glycyrrhizae	MOL004856	Gancaonin A	Thrombin	Thrombin
Glycyrrhizae	MOL004856	Gancaonin A	Estrogen receptor	ESR1
Glycyrrhizae	MOL004856	Gancaonin A	Androgen receptor	AR
Glycyrrhizae	MOL004856	Gancaonin A	Sodium channel protein type 5 subunit alpha	SCN5A
Glycyrrhizae	MOL004856	Gancaonin A	Peroxisome proliferator activated receptor gamma	PPARG
Glycyrrhizae	MOL004856	Gancaonin A	Coagulation factor Xa	F10
Glycyrrhizae	MOL004856	Gancaonin A	Prostaglandin G/H synthase 2	PTGS2
Glycyrrhizae	MOL004856	Gancaonin A	Acetylcholinesterase	ACHE
Glycyrrhizae	MOL004856	Gancaonin A	DNA topoisomerase II	TOP2
Glycyrrhizae	MOL004856	Gancaonin A	Estrogen receptor beta	ESR2
Glycyrrhizae	MOL004856	Gancaonin A	Dipeptidyl peptidase IV	DPP4
Glycyrrhizae	MOL004856	Gancaonin A	Glycogen synthase kinase-3 beta	GSK3B
Glycyrrhizae	MOL004856	Gancaonin A	Heat shock protein HSP 90	HSP90
Glycyrrhizae	MOL004856	Gancaonin A	Serine/threonine-protein kinase Chk1	CHEK1
Glycyrrhizae	MOL004856	Gancaonin A	Trypsin-1	PRSS1
Glycyrrhizae	MOL004856	Gancaonin A	Proto-oncogene serine/threonine-protein kinase Pim-1	PIM1
Glycyrrhizae	MOL004856	Gancaonin A	Cyclin-A2	CCNA2
Glycyrrhizae	MOL004856	Gancaonin A	Nuclear receptor coactivator 2	NCOA2
Glycyrrhizae	MOL004856	Gancaonin A	Calmodulin	CaM
Glycyrrhizae	MOL004857	Gancaonin B	Nitric oxide synthase, inducible	NOS2
Glycyrrhizae	MOL004857	Gancaonin B	Thrombin	Thrombin
Glycyrrhizae	MOL004857	Gancaonin B	Estrogen receptor	ESR1
Glycyrrhizae	MOL004857	Gancaonin B	Androgen receptor	AR
Glycyrrhizae	MOL004857	Gancaonin B	Peroxisome proliferator activated receptor gamma	PPARG
Glycyrrhizae	MOL004857	Gancaonin B	Coagulation factor Xa	F10
Glycyrrhizae	MOL004857	Gancaonin B	Prostaglandin G/H synthase 2	PTGS2
Glycyrrhizae	MOL004857	Gancaonin B	Coagulation factor VII	F7
Glycyrrhizae	MOL004857	Gancaonin B	Vascular endothelial growth factor receptor 2	KDR
Glycyrrhizae	MOL004857	Gancaonin B	Alpha-1B adrenergic receptor	ADRA1B
Glycyrrhizae	MOL004857	Gancaonin B	Beta-2 adrenergic receptor	ADRB2
Glycyrrhizae	MOL004857	Gancaonin B	DNA topoisomerase II	TOP2
Glycyrrhizae	MOL004857	Gancaonin B	Estrogen receptor beta	ESR2
Glycyrrhizae	MOL004857	Gancaonin B	Dipeptidyl peptidase IV	DPP4
Glycyrrhizae	MOL004857	Gancaonin B	Glycogen synthase kinase-3 beta	GSK3B
Glycyrrhizae	MOL004857	Gancaonin B	Heat shock protein HSP 90	HSP90
Glycyrrhizae	MOL004857	Gancaonin B	Serine/threonine-protein kinase Chk1	CHEK1
Glycyrrhizae	MOL004857	Gancaonin B	Trypsin-1	PRSS1
Glycyrrhizae	MOL004857	Gancaonin B	Proto-oncogene serine/threonine-protein kinase Pim-1	PIM1
Glycyrrhizae	MOL004857	Gancaonin B	Cyclin-A2	CCNA2
Glycyrrhizae	MOL004857	Gancaonin B	Nuclear receptor coactivator 2	NCOA2
Glycyrrhizae	MOL004857	Gancaonin B	Calmodulin	CaM
Glycyrrhizae	MOL004863	3-(3,4-dihydroxyphenyl)-5,7-dihydroxy-8-(3-methylbut-2-enyl)chromone	Nitric oxide synthase, inducible	NOS2
Glycyrrhizae	MOL004863	3-(3,4-dihydroxyphenyl)-5,7-dihydroxy-8-(3-methylbut-2-enyl)chromone	Thrombin	Thrombin
Glycyrrhizae	MOL004863	3-(3,4-dihydroxyphenyl)-5,7-dihydroxy-8-(3-methylbut-2-enyl)chromone	Estrogen receptor	ESR1
Glycyrrhizae	MOL004863	3-(3,4-dihydroxyphenyl)-5,7-dihydroxy-8-(3-methylbut-2-enyl)chromone	Androgen receptor	AR
Glycyrrhizae	MOL004863	3-(3,4-dihydroxyphenyl)-5,7-dihydroxy-8-(3-methylbut-2-enyl)chromone	Peroxisome proliferator activated receptor gamma	PPARG
Glycyrrhizae	MOL004863	3-(3,4-dihydroxyphenyl)-5,7-dihydroxy-8-(3-methylbut-2-enyl)chromone	Coagulation factor Xa	F10
Glycyrrhizae	MOL004863	3-(3,4-dihydroxyphenyl)-5,7-dihydroxy-8-(3-methylbut-2-enyl)chromone	Prostaglandin G/H synthase 2	PTGS2
Glycyrrhizae	MOL004863	3-(3,4-dihydroxyphenyl)-5,7-dihydroxy-8-(3-methylbut-2-enyl)chromone	mRNA of Protein-tyrosine phosphatase, non-receptor type 1	PTPN1
Glycyrrhizae	MOL004863	3-(3,4-dihydroxyphenyl)-5,7-dihydroxy-8-(3-methylbut-2-enyl)chromone	Mitogen-activated protein kinase 14	MAPK14
Glycyrrhizae	MOL004863	3-(3,4-dihydroxyphenyl)-5,7-dihydroxy-8-(3-methylbut-2-enyl)chromone	Glycogen synthase kinase-3 beta	GSK3B
Glycyrrhizae	MOL004863	3-(3,4-dihydroxyphenyl)-5,7-dihydroxy-8-(3-methylbut-2-enyl)chromone	Heat shock protein HSP 90	HSP90
Glycyrrhizae	MOL004863	3-(3,4-dihydroxyphenyl)-5,7-dihydroxy-8-(3-methylbut-2-enyl)chromone	Cell division protein kinase 2	CDK2
Glycyrrhizae	MOL004863	3-(3,4-dihydroxyphenyl)-5,7-dihydroxy-8-(3-methylbut-2-enyl)chromone	Serine/threonine-protein kinase Chk1	CHEK1
Glycyrrhizae	MOL004863	3-(3,4-dihydroxyphenyl)-5,7-dihydroxy-8-(3-methylbut-2-enyl)chromone	Trypsin-1	PRSS1
Glycyrrhizae	MOL004863	3-(3,4-dihydroxyphenyl)-5,7-dihydroxy-8-(3-methylbut-2-enyl)chromone	Proto-oncogene serine/threonine-protein kinase Pim-1	PIM1
Glycyrrhizae	MOL004863	3-(3,4-dihydroxyphenyl)-5,7-dihydroxy-8-(3-methylbut-2-enyl)chromone	Cyclin-A2	CCNA2
Glycyrrhizae	MOL004863	3-(3,4-dihydroxyphenyl)-5,7-dihydroxy-8-(3-methylbut-2-enyl)chromone	Nuclear receptor coactivator 2	NCOA2
Glycyrrhizae	MOL004863	3-(3,4-dihydroxyphenyl)-5,7-dihydroxy-8-(3-methylbut-2-enyl)chromone	Calmodulin	CaM
Glycyrrhizae	MOL004864	5,7-dihydroxy-3-(4-methoxyphenyl)-8-(3-methylbut-2-enyl)chromone	Nitric oxide synthase, inducible	NOS2
Glycyrrhizae	MOL004864	5,7-dihydroxy-3-(4-methoxyphenyl)-8-(3-methylbut-2-enyl)chromone	Potassium voltage-gated channel subfamily H member 2	KCNH2
Glycyrrhizae	MOL004864	5,7-dihydroxy-3-(4-methoxyphenyl)-8-(3-methylbut-2-enyl)chromone	Estrogen receptor	ESR1
Glycyrrhizae	MOL004864	5,7-dihydroxy-3-(4-methoxyphenyl)-8-(3-methylbut-2-enyl)chromone	Androgen receptor	AR
Glycyrrhizae	MOL004864	5,7-dihydroxy-3-(4-methoxyphenyl)-8-(3-methylbut-2-enyl)chromone	Peroxisome proliferator activated receptor gamma	PPARG
Glycyrrhizae	MOL004864	5,7-dihydroxy-3-(4-methoxyphenyl)-8-(3-methylbut-2-enyl)chromone	Coagulation factor Xa	F10
Glycyrrhizae	MOL004864	5,7-dihydroxy-3-(4-methoxyphenyl)-8-(3-methylbut-2-enyl)chromone	Prostaglandin G/H synthase 2	PTGS2
Glycyrrhizae	MOL004864	5,7-dihydroxy-3-(4-methoxyphenyl)-8-(3-methylbut-2-enyl)chromone	DNA topoisomerase II	TOP2
Glycyrrhizae	MOL004864	5,7-dihydroxy-3-(4-methoxyphenyl)-8-(3-methylbut-2-enyl)chromone	Estrogen receptor beta	ESR2
Glycyrrhizae	MOL004864	5,7-dihydroxy-3-(4-methoxyphenyl)-8-(3-methylbut-2-enyl)chromone	Dipeptidyl peptidase IV	DPP4
Glycyrrhizae	MOL004864	5,7-dihydroxy-3-(4-methoxyphenyl)-8-(3-methylbut-2-enyl)chromone	Mitogen-activated protein kinase 14	MAPK14
Glycyrrhizae	MOL004864	5,7-dihydroxy-3-(4-methoxyphenyl)-8-(3-methylbut-2-enyl)chromone	Glycogen synthase kinase-3 beta	GSK3B
Glycyrrhizae	MOL004864	5,7-dihydroxy-3-(4-methoxyphenyl)-8-(3-methylbut-2-enyl)chromone	Heat shock protein HSP 90	HSP90
Glycyrrhizae	MOL004864	5,7-dihydroxy-3-(4-methoxyphenyl)-8-(3-methylbut-2-enyl)chromone	Cell division protein kinase 2	CDK2
Glycyrrhizae	MOL004864	5,7-dihydroxy-3-(4-methoxyphenyl)-8-(3-methylbut-2-enyl)chromone	Serine/threonine-protein kinase Chk1	CHEK1
Glycyrrhizae	MOL004864	5,7-dihydroxy-3-(4-methoxyphenyl)-8-(3-methylbut-2-enyl)chromone	Trypsin-1	PRSS1
Glycyrrhizae	MOL004864	5,7-dihydroxy-3-(4-methoxyphenyl)-8-(3-methylbut-2-enyl)chromone	Proto-oncogene serine/threonine-protein kinase Pim-1	PIM1
Glycyrrhizae	MOL004864	5,7-dihydroxy-3-(4-methoxyphenyl)-8-(3-methylbut-2-enyl)chromone	Cyclin-A2	CCNA2
Glycyrrhizae	MOL004864	5,7-dihydroxy-3-(4-methoxyphenyl)-8-(3-methylbut-2-enyl)chromone	Nuclear receptor coactivator 2	NCOA2
Glycyrrhizae	MOL004864	5,7-dihydroxy-3-(4-methoxyphenyl)-8-(3-methylbut-2-enyl)chromone	Calmodulin	CaM
Glycyrrhizae	MOL004866	2-(3,4-dihydroxyphenyl)-5,7-dihydroxy-6-(3-methylbut-2-enyl)chromone	Thrombin	Thrombin
Glycyrrhizae	MOL004866	2-(3,4-dihydroxyphenyl)-5,7-dihydroxy-6-(3-methylbut-2-enyl)chromone	Androgen receptor	AR
Glycyrrhizae	MOL004866	2-(3,4-dihydroxyphenyl)-5,7-dihydroxy-6-(3-methylbut-2-enyl)chromone	Sodium channel protein type 5 subunit alpha	SCN5A
Glycyrrhizae	MOL004866	2-(3,4-dihydroxyphenyl)-5,7-dihydroxy-6-(3-methylbut-2-enyl)chromone	Peroxisome proliferator activated receptor gamma	PPARG
Glycyrrhizae	MOL004866	2-(3,4-dihydroxyphenyl)-5,7-dihydroxy-6-(3-methylbut-2-enyl)chromone	Coagulation factor Xa	F10
Glycyrrhizae	MOL004866	2-(3,4-dihydroxyphenyl)-5,7-dihydroxy-6-(3-methylbut-2-enyl)chromone	Prostaglandin G/H synthase 2	PTGS2
Glycyrrhizae	MOL004866	2-(3,4-dihydroxyphenyl)-5,7-dihydroxy-6-(3-methylbut-2-enyl)chromone	Coagulation factor VII	F7
Glycyrrhizae	MOL004866	2-(3,4-dihydroxyphenyl)-5,7-dihydroxy-6-(3-methylbut-2-enyl)chromone	Beta-2 adrenergic receptor	ADRB2
Glycyrrhizae	MOL004866	2-(3,4-dihydroxyphenyl)-5,7-dihydroxy-6-(3-methylbut-2-enyl)chromone	Dipeptidyl peptidase IV	DPP4
Glycyrrhizae	MOL004866	2-(3,4-dihydroxyphenyl)-5,7-dihydroxy-6-(3-methylbut-2-enyl)chromone	Heat shock protein HSP 90	HSP90
Glycyrrhizae	MOL004866	2-(3,4-dihydroxyphenyl)-5,7-dihydroxy-6-(3-methylbut-2-enyl)chromone	Cell division protein kinase 2	CDK2
Glycyrrhizae	MOL004866	2-(3,4-dihydroxyphenyl)-5,7-dihydroxy-6-(3-methylbut-2-enyl)chromone	Serine/threonine-protein kinase Chk1	CHEK1
Glycyrrhizae	MOL004866	2-(3,4-dihydroxyphenyl)-5,7-dihydroxy-6-(3-methylbut-2-enyl)chromone	Trypsin-1	PRSS1
Glycyrrhizae	MOL004866	2-(3,4-dihydroxyphenyl)-5,7-dihydroxy-6-(3-methylbut-2-enyl)chromone	Proto-oncogene serine/threonine-protein kinase Pim-1	PIM1
Glycyrrhizae	MOL004866	2-(3,4-dihydroxyphenyl)-5,7-dihydroxy-6-(3-methylbut-2-enyl)chromone	Cyclin-A2	CCNA2
Glycyrrhizae	MOL004866	2-(3,4-dihydroxyphenyl)-5,7-dihydroxy-6-(3-methylbut-2-enyl)chromone	Calmodulin	CaM
Glycyrrhizae	MOL004879	Glycyrin	Nitric oxide synthase, inducible	NOS2
Glycyrrhizae	MOL004879	Glycyrin	Thrombin	Thrombin
Glycyrrhizae	MOL004879	Glycyrin	Potassium voltage-gated channel subfamily H member 2	KCNH2
Glycyrrhizae	MOL004879	Glycyrin	Estrogen receptor	ESR1
Glycyrrhizae	MOL004879	Glycyrin	Androgen receptor	AR
Glycyrrhizae	MOL004879	Glycyrin	Peroxisome proliferator activated receptor gamma	PPARG
Glycyrrhizae	MOL004879	Glycyrin	Coagulation factor Xa	F10
Glycyrrhizae	MOL004879	Glycyrin	Prostaglandin G/H synthase 2	PTGS2
Glycyrrhizae	MOL004879	Glycyrin	Vascular endothelial growth factor receptor 2	KDR
Glycyrrhizae	MOL004879	Glycyrin	DNA topoisomerase II	TOP2
Glycyrrhizae	MOL004879	Glycyrin	Estrogen receptor beta	ESR2
Glycyrrhizae	MOL004879	Glycyrin	Dipeptidyl peptidase IV	DPP4
Glycyrrhizae	MOL004879	Glycyrin	Serine/threonine-protein kinase Chk1	CHEK1
Glycyrrhizae	MOL004879	Glycyrin	Trypsin-1	PRSS1
Glycyrrhizae	MOL004879	Glycyrin	Proto-oncogene serine/threonine-protein kinase Pim-1	PIM1
Glycyrrhizae	MOL004879	Glycyrin	Nuclear receptor coactivator 2	NCOA2
Glycyrrhizae	MOL004879	Glycyrin	Calmodulin	CaM
Glycyrrhizae	MOL004882	Licocoumarone	Estrogen receptor	ESR1
Glycyrrhizae	MOL004882	Licocoumarone	Androgen receptor	AR
Glycyrrhizae	MOL004882	Licocoumarone	Estrogen receptor beta	ESR2
Glycyrrhizae	MOL004882	Licocoumarone	Glycogen synthase kinase-3 beta	GSK3B
Glycyrrhizae	MOL004882	Licocoumarone	Heat shock protein HSP 90	HSP90
Glycyrrhizae	MOL004882	Licocoumarone	Cell division protein kinase 2	CDK2
Glycyrrhizae	MOL004882	Licocoumarone	Cyclin-A2	CCNA2
Glycyrrhizae	MOL004883	Licoisoflavone	Nitric oxide synthase, inducible	NOS2
Glycyrrhizae	MOL004883	Licoisoflavone	Thrombin	Thrombin
Glycyrrhizae	MOL004883	Licoisoflavone	Estrogen receptor	ESR1
Glycyrrhizae	MOL004883	Licoisoflavone	Androgen receptor	AR
Glycyrrhizae	MOL004883	Licoisoflavone	Peroxisome proliferator activated receptor gamma	PPARG
Glycyrrhizae	MOL004883	Licoisoflavone	Coagulation factor Xa	F10
Glycyrrhizae	MOL004883	Licoisoflavone	Prostaglandin G/H synthase 2	PTGS2
Glycyrrhizae	MOL004883	Licoisoflavone	Vascular endothelial growth factor receptor 2	KDR
Glycyrrhizae	MOL004883	Licoisoflavone	DNA topoisomerase II	TOP2
Glycyrrhizae	MOL004883	Licoisoflavone	Dipeptidyl peptidase IV	DPP4
Glycyrrhizae	MOL004883	Licoisoflavone	Mitogen-activated protein kinase 14	MAPK14
Glycyrrhizae	MOL004883	Licoisoflavone	Heat shock protein HSP 90	HSP90
Glycyrrhizae	MOL004883	Licoisoflavone	Cell division protein kinase 2	CDK2
Glycyrrhizae	MOL004883	Licoisoflavone	Serine/threonine-protein kinase Chk1	CHEK1
Glycyrrhizae	MOL004883	Licoisoflavone	Trypsin-1	PRSS1
Glycyrrhizae	MOL004883	Licoisoflavone	Proto-oncogene serine/threonine-protein kinase Pim-1	PIM1
Glycyrrhizae	MOL004883	Licoisoflavone	Cyclin-A2	CCNA2
Glycyrrhizae	MOL004883	Licoisoflavone	Nuclear receptor coactivator 2	NCOA2
Glycyrrhizae	MOL004883	Licoisoflavone	Calmodulin	CaM
Glycyrrhizae	MOL004884	Licoisoflavone B	Nitric oxide synthase, inducible	NOS2
Glycyrrhizae	MOL004884	Licoisoflavone B	Thrombin	Thrombin
Glycyrrhizae	MOL004884	Licoisoflavone B	Estrogen receptor	ESR1
Glycyrrhizae	MOL004884	Licoisoflavone B	Androgen receptor	AR
Glycyrrhizae	MOL004884	Licoisoflavone B	Peroxisome proliferator activated receptor gamma	PPARG
Glycyrrhizae	MOL004884	Licoisoflavone B	Coagulation factor Xa	F10
Glycyrrhizae	MOL004884	Licoisoflavone B	Prostaglandin G/H synthase 2	PTGS2
Glycyrrhizae	MOL004884	Licoisoflavone B	Acetylcholinesterase	ACHE
Glycyrrhizae	MOL004884	Licoisoflavone B	DNA topoisomerase II	TOP2
Glycyrrhizae	MOL004884	Licoisoflavone B	Estrogen receptor beta	ESR2
Glycyrrhizae	MOL004884	Licoisoflavone B	Glycogen synthase kinase-3 beta	GSK3B
Glycyrrhizae	MOL004884	Licoisoflavone B	Cell division protein kinase 2	CDK2
Glycyrrhizae	MOL004884	Licoisoflavone B	Serine/threonine-protein kinase Chk1	CHEK1
Glycyrrhizae	MOL004884	Licoisoflavone B	Trypsin-1	PRSS1
Glycyrrhizae	MOL004884	Licoisoflavone B	Proto-oncogene serine/threonine-protein kinase Pim-1	PIM1
Glycyrrhizae	MOL004884	Licoisoflavone B	Cyclin-A2	CCNA2
Glycyrrhizae	MOL004884	Licoisoflavone B	Calmodulin	CaM
Glycyrrhizae	MOL004885	licoisoflavanone	Nitric oxide synthase, inducible	NOS2
Glycyrrhizae	MOL004885	licoisoflavanone	Prostaglandin G/H synthase 1	PTGS1
Glycyrrhizae	MOL004885	licoisoflavanone	Estrogen receptor	ESR1
Glycyrrhizae	MOL004885	licoisoflavanone	Androgen receptor	AR
Glycyrrhizae	MOL004885	licoisoflavanone	Sodium channel protein type 5 subunit alpha	SCN5A
Glycyrrhizae	MOL004885	licoisoflavanone	Peroxisome proliferator activated receptor gamma	PPARG
Glycyrrhizae	MOL004885	licoisoflavanone	Coagulation factor Xa	F10
Glycyrrhizae	MOL004885	licoisoflavanone	Prostaglandin G/H synthase 2	PTGS2
Glycyrrhizae	MOL004885	licoisoflavanone	Coagulation factor VII	F7
Glycyrrhizae	MOL004885	licoisoflavanone	Acetylcholinesterase	ACHE
Glycyrrhizae	MOL004885	licoisoflavanone	DNA topoisomerase II	TOP2
Glycyrrhizae	MOL004885	licoisoflavanone	Estrogen receptor beta	ESR2
Glycyrrhizae	MOL004885	licoisoflavanone	Glycogen synthase kinase-3 beta	GSK3B
Glycyrrhizae	MOL004885	licoisoflavanone	Heat shock protein HSP 90	HSP90
Glycyrrhizae	MOL004885	licoisoflavanone	Cell division protein kinase 2	CDK2
Glycyrrhizae	MOL004885	licoisoflavanone	Trypsin-1	PRSS1
Glycyrrhizae	MOL004885	licoisoflavanone	Proto-oncogene serine/threonine-protein kinase Pim-1	PIM1
Glycyrrhizae	MOL004885	licoisoflavanone	Cyclin-A2	CCNA2
Glycyrrhizae	MOL004885	licoisoflavanone	Nuclear receptor coactivator 1	NCOA1
Glycyrrhizae	MOL004885	licoisoflavanone	Calmodulin	CaM
Glycyrrhizae	MOL004891	shinpterocarpin	Nitric oxide synthase, inducible	NOS2
Glycyrrhizae	MOL004891	shinpterocarpin	Prostaglandin G/H synthase 1	PTGS1
Glycyrrhizae	MOL004891	shinpterocarpin	Muscarinic acetylcholine receptor M3	CHRM3
Glycyrrhizae	MOL004891	shinpterocarpin	Potassium voltage-gated channel subfamily H member 2	KCNH2
Glycyrrhizae	MOL004891	shinpterocarpin	Muscarinic acetylcholine receptor M1	CHRM1
Glycyrrhizae	MOL004891	shinpterocarpin	Estrogen receptor	ESR1
Glycyrrhizae	MOL004891	shinpterocarpin	Androgen receptor	AR
Glycyrrhizae	MOL004891	shinpterocarpin	Sodium channel protein type 5 subunit alpha	SCN5A
Glycyrrhizae	MOL004891	shinpterocarpin	Peroxisome proliferator activated receptor gamma	PPARG
Glycyrrhizae	MOL004891	shinpterocarpin	Prostaglandin G/H synthase 2	PTGS2
Glycyrrhizae	MOL004891	shinpterocarpin	5-hydroxytryptamine receptor 3A	HTR3A
Glycyrrhizae	MOL004891	shinpterocarpin	Retinoic acid receptor RXR-alpha	RXRA
Glycyrrhizae	MOL004891	shinpterocarpin	Delta-type opioid receptor	OPRD1
Glycyrrhizae	MOL004891	shinpterocarpin	Alpha-1B adrenergic receptor	ADRA1B
Glycyrrhizae	MOL004891	shinpterocarpin	Beta-2 adrenergic receptor	ADRB2
Glycyrrhizae	MOL004891	shinpterocarpin	Alpha-1D adrenergic receptor	ADRA1D
Glycyrrhizae	MOL004891	shinpterocarpin	Mu-type opioid receptor	OPRM1
Glycyrrhizae	MOL004891	shinpterocarpin	Estrogen receptor beta	ESR2
Glycyrrhizae	MOL004891	shinpterocarpin	Mitogen-activated protein kinase 14	MAPK14
Glycyrrhizae	MOL004891	shinpterocarpin	Glycogen synthase kinase-3 beta	GSK3B
Glycyrrhizae	MOL004891	shinpterocarpin	Cell division protein kinase 2	CDK2
Glycyrrhizae	MOL004891	shinpterocarpin	Phosphatidylinositol-4,5-bisphosphate 3-kinase catalytic subunit, gamma isoform	PIK3CG
Glycyrrhizae	MOL004891	shinpterocarpin	Neuronal acetylcholine receptor protein, alpha-7 chain	CHRNA7
Glycyrrhizae	MOL004891	shinpterocarpin	mRNA of PKA Catalytic Subunit C-alpha	PKACA
Glycyrrhizae	MOL004891	shinpterocarpin	Retinoic acid receptor RXR-beta	RXRB
Glycyrrhizae	MOL004891	shinpterocarpin	Trypsin-1	PRSS1
Glycyrrhizae	MOL004891	shinpterocarpin	Proto-oncogene serine/threonine-protein kinase Pim-1	PIM1
Glycyrrhizae	MOL004891	shinpterocarpin	Cyclin-A2	CCNA2
Glycyrrhizae	MOL004891	shinpterocarpin	Nuclear receptor coactivator 1	NCOA1
Glycyrrhizae	MOL004891	shinpterocarpin	Calmodulin	CaM
Glycyrrhizae	MOL004898	(E)-3-[3,4-dihydroxy-5-(3-methylbut-2-enyl)phenyl]-1-(2,4-dihydroxyphenyl)prop-2-en-1-one	Estrogen receptor	ESR1
Glycyrrhizae	MOL004898	(E)-3-[3,4-dihydroxy-5-(3-methylbut-2-enyl)phenyl]-1-(2,4-dihydroxyphenyl)prop-2-en-1-one	Androgen receptor	AR
Glycyrrhizae	MOL004898	(E)-3-[3,4-dihydroxy-5-(3-methylbut-2-enyl)phenyl]-1-(2,4-dihydroxyphenyl)prop-2-en-1-one	Peroxisome proliferator activated receptor gamma	PPARG
Glycyrrhizae	MOL004898	(E)-3-[3,4-dihydroxy-5-(3-methylbut-2-enyl)phenyl]-1-(2,4-dihydroxyphenyl)prop-2-en-1-one	Prostaglandin G/H synthase 2	PTGS2
Glycyrrhizae	MOL004898	(E)-3-[3,4-dihydroxy-5-(3-methylbut-2-enyl)phenyl]-1-(2,4-dihydroxyphenyl)prop-2-en-1-one	Mitogen-activated protein kinase 14	MAPK14
Glycyrrhizae	MOL004898	(E)-3-[3,4-dihydroxy-5-(3-methylbut-2-enyl)phenyl]-1-(2,4-dihydroxyphenyl)prop-2-en-1-one	Glycogen synthase kinase-3 beta	GSK3B
Glycyrrhizae	MOL004898	(E)-3-[3,4-dihydroxy-5-(3-methylbut-2-enyl)phenyl]-1-(2,4-dihydroxyphenyl)prop-2-en-1-one	Heat shock protein HSP 90	HSP90
Glycyrrhizae	MOL004898	(E)-3-[3,4-dihydroxy-5-(3-methylbut-2-enyl)phenyl]-1-(2,4-dihydroxyphenyl)prop-2-en-1-one	Cell division protein kinase 2	CDK2
Glycyrrhizae	MOL004898	(E)-3-[3,4-dihydroxy-5-(3-methylbut-2-enyl)phenyl]-1-(2,4-dihydroxyphenyl)prop-2-en-1-one	Proto-oncogene serine/threonine-protein kinase Pim-1	PIM1
Glycyrrhizae	MOL004898	(E)-3-[3,4-dihydroxy-5-(3-methylbut-2-enyl)phenyl]-1-(2,4-dihydroxyphenyl)prop-2-en-1-one	Cyclin-A2	CCNA2
Glycyrrhizae	MOL004898	(E)-3-[3,4-dihydroxy-5-(3-methylbut-2-enyl)phenyl]-1-(2,4-dihydroxyphenyl)prop-2-en-1-one	Nuclear receptor coactivator 2	NCOA2
Glycyrrhizae	MOL004898	(E)-3-[3,4-dihydroxy-5-(3-methylbut-2-enyl)phenyl]-1-(2,4-dihydroxyphenyl)prop-2-en-1-one	Calmodulin	CaM
Glycyrrhizae	MOL004904	licopyranocoumarin	Nitric oxide synthase, inducible	NOS2
Glycyrrhizae	MOL004904	licopyranocoumarin	Thrombin	Thrombin
Glycyrrhizae	MOL004904	licopyranocoumarin	Estrogen receptor	ESR1
Glycyrrhizae	MOL004904	licopyranocoumarin	Androgen receptor	AR
Glycyrrhizae	MOL004904	licopyranocoumarin	Peroxisome proliferator activated receptor gamma	PPARG
Glycyrrhizae	MOL004904	licopyranocoumarin	Coagulation factor Xa	F10
Glycyrrhizae	MOL004904	licopyranocoumarin	Prostaglandin G/H synthase 2	PTGS2
Glycyrrhizae	MOL004904	licopyranocoumarin	Coagulation factor VII	F7
Glycyrrhizae	MOL004904	licopyranocoumarin	Vascular endothelial growth factor receptor 2	KDR
Glycyrrhizae	MOL004904	licopyranocoumarin	Acetylcholinesterase	ACHE
Glycyrrhizae	MOL004904	licopyranocoumarin	DNA topoisomerase II	TOP2
Glycyrrhizae	MOL004904	licopyranocoumarin	Cell division protein kinase 2	CDK2
Glycyrrhizae	MOL004904	licopyranocoumarin	Trypsin-1	PRSS1
Glycyrrhizae	MOL004904	licopyranocoumarin	Proto-oncogene serine/threonine-protein kinase Pim-1	PIM1
Glycyrrhizae	MOL004904	licopyranocoumarin	Cyclin-A2	CCNA2
Glycyrrhizae	MOL004904	licopyranocoumarin	Calmodulin	CaM
Glycyrrhizae	MOL004907	Glyzaglabrin	Nitric oxide synthase, inducible	NOS2
Glycyrrhizae	MOL004907	Glyzaglabrin	Prostaglandin G/H synthase 1	PTGS1
Glycyrrhizae	MOL004907	Glyzaglabrin	Estrogen receptor	ESR1
Glycyrrhizae	MOL004907	Glyzaglabrin	Androgen receptor	AR
Glycyrrhizae	MOL004907	Glyzaglabrin	Peroxisome proliferator activated receptor gamma	PPARG
Glycyrrhizae	MOL004907	Glyzaglabrin	Prostaglandin G/H synthase 2	PTGS2
Glycyrrhizae	MOL004907	Glyzaglabrin	Estrogen receptor beta	ESR2
Glycyrrhizae	MOL004907	Glyzaglabrin	Dipeptidyl peptidase IV	DPP4
Glycyrrhizae	MOL004907	Glyzaglabrin	Mitogen-activated protein kinase 14	MAPK14
Glycyrrhizae	MOL004907	Glyzaglabrin	Glycogen synthase kinase-3 beta	GSK3B
Glycyrrhizae	MOL004907	Glyzaglabrin	Heat shock protein HSP 90	HSP90
Glycyrrhizae	MOL004907	Glyzaglabrin	Cell division protein kinase 2	CDK2
Glycyrrhizae	MOL004907	Glyzaglabrin	Phosphatidylinositol-4,5-bisphosphate 3-kinase catalytic subunit, gamma isoform	PIK3CG
Glycyrrhizae	MOL004907	Glyzaglabrin	Serine/threonine-protein kinase Chk1	CHEK1
Glycyrrhizae	MOL004907	Glyzaglabrin	mRNA of PKA Catalytic Subunit C-alpha	PKACA
Glycyrrhizae	MOL004907	Glyzaglabrin	Trypsin-1	PRSS1
Glycyrrhizae	MOL004907	Glyzaglabrin	Proto-oncogene serine/threonine-protein kinase Pim-1	PIM1
Glycyrrhizae	MOL004907	Glyzaglabrin	Cyclin-A2	CCNA2
Glycyrrhizae	MOL004908	Glabridin	Nitric oxide synthase, inducible	NOS2
Glycyrrhizae	MOL004908	Glabridin	Muscarinic acetylcholine receptor M1	CHRM1
Glycyrrhizae	MOL004908	Glabridin	Estrogen receptor	ESR1
Glycyrrhizae	MOL004908	Glabridin	Androgen receptor	AR
Glycyrrhizae	MOL004908	Glabridin	Sodium channel protein type 5 subunit alpha	SCN5A
Glycyrrhizae	MOL004908	Glabridin	Peroxisome proliferator activated receptor gamma	PPARG
Glycyrrhizae	MOL004908	Glabridin	Prostaglandin G/H synthase 2	PTGS2
Glycyrrhizae	MOL004908	Glabridin	Retinoic acid receptor RXR-alpha	RXRA
Glycyrrhizae	MOL004908	Glabridin	Acetylcholinesterase	ACHE
Glycyrrhizae	MOL004908	Glabridin	Alpha-1B adrenergic receptor	ADRA1B
Glycyrrhizae	MOL004908	Glabridin	Beta-2 adrenergic receptor	ADRB2
Glycyrrhizae	MOL004908	Glabridin	Estrogen receptor beta	ESR2
Glycyrrhizae	MOL004908	Glabridin	Mitogen-activated protein kinase 14	MAPK14
Glycyrrhizae	MOL004908	Glabridin	Glycogen synthase kinase-3 beta	GSK3B
Glycyrrhizae	MOL004908	Glabridin	Cell division protein kinase 2	CDK2
Glycyrrhizae	MOL004908	Glabridin	Serine/threonine-protein kinase Chk1	CHEK1
Glycyrrhizae	MOL004908	Glabridin	mRNA of PKA Catalytic Subunit C-alpha	PKACA
Glycyrrhizae	MOL004908	Glabridin	Retinoic acid receptor RXR-beta	RXRB
Glycyrrhizae	MOL004908	Glabridin	Ig gamma-1 chain C region	Ighg1
Glycyrrhizae	MOL004908	Glabridin	Trypsin-1	PRSS1
Glycyrrhizae	MOL004908	Glabridin	Proto-oncogene serine/threonine-protein kinase Pim-1	PIM1
Glycyrrhizae	MOL004908	Glabridin	Cyclin-A2	CCNA2
Glycyrrhizae	MOL004908	Glabridin	Nuclear receptor coactivator 2	NCOA2
Glycyrrhizae	MOL004908	Glabridin	Nuclear receptor coactivator 1	NCOA1
Glycyrrhizae	MOL004908	Glabridin	Calmodulin	CaM
Glycyrrhizae	MOL004910	Glabranin	Nitric oxide synthase, inducible	NOS2
Glycyrrhizae	MOL004910	Glabranin	Prostaglandin G/H synthase 1	PTGS1
Glycyrrhizae	MOL004910	Glabranin	Estrogen receptor	ESR1
Glycyrrhizae	MOL004910	Glabranin	Sodium channel protein type 5 subunit alpha	SCN5A
Glycyrrhizae	MOL004910	Glabranin	Coagulation factor Xa	F10
Glycyrrhizae	MOL004910	Glabranin	Prostaglandin G/H synthase 2	PTGS2
Glycyrrhizae	MOL004910	Glabranin	Nitric-oxide synthase, endothelial	NOS3
Glycyrrhizae	MOL004910	Glabranin	CGMP-inhibited 3',5'-cyclic phosphodiesterase A	PDE3A
Glycyrrhizae	MOL004910	Glabranin	Heat shock protein HSP 90	HSP90
Glycyrrhizae	MOL004910	Glabranin	mRNA of PKA Catalytic Subunit C-alpha	PKACA
Glycyrrhizae	MOL004910	Glabranin	Calmodulin	CaM
Glycyrrhizae	MOL004911	Glabrene	Nitric oxide synthase, inducible	NOS2
Glycyrrhizae	MOL004911	Glabrene	Prostaglandin G/H synthase 1	PTGS1
Glycyrrhizae	MOL004911	Glabrene	Estrogen receptor	ESR1
Glycyrrhizae	MOL004911	Glabrene	Androgen receptor	AR
Glycyrrhizae	MOL004911	Glabrene	Sodium channel protein type 5 subunit alpha	SCN5A
Glycyrrhizae	MOL004911	Glabrene	Peroxisome proliferator activated receptor gamma	PPARG
Glycyrrhizae	MOL004911	Glabrene	Coagulation factor Xa	F10
Glycyrrhizae	MOL004911	Glabrene	Prostaglandin G/H synthase 2	PTGS2
Glycyrrhizae	MOL004911	Glabrene	Retinoic acid receptor RXR-alpha	RXRA
Glycyrrhizae	MOL004911	Glabrene	Beta-2 adrenergic receptor	ADRB2
Glycyrrhizae	MOL004911	Glabrene	Estrogen receptor beta	ESR2
Glycyrrhizae	MOL004911	Glabrene	Mitogen-activated protein kinase 14	MAPK14
Glycyrrhizae	MOL004911	Glabrene	Glycogen synthase kinase-3 beta	GSK3B
Glycyrrhizae	MOL004911	Glabrene	Heat shock protein HSP 90	HSP90
Glycyrrhizae	MOL004911	Glabrene	Cell division protein kinase 2	CDK2
Glycyrrhizae	MOL004911	Glabrene	Trypsin-1	PRSS1
Glycyrrhizae	MOL004911	Glabrene	Proto-oncogene serine/threonine-protein kinase Pim-1	PIM1
Glycyrrhizae	MOL004911	Glabrene	Nuclear receptor coactivator 2	NCOA2
Glycyrrhizae	MOL004911	Glabrene	Calmodulin	CaM
Glycyrrhizae	MOL004912	Glabrone	Nitric oxide synthase, inducible	NOS2
Glycyrrhizae	MOL004912	Glabrone	Prostaglandin G/H synthase 1	PTGS1
Glycyrrhizae	MOL004912	Glabrone	Thrombin	Thrombin
Glycyrrhizae	MOL004912	Glabrone	Estrogen receptor	ESR1
Glycyrrhizae	MOL004912	Glabrone	Androgen receptor	AR
Glycyrrhizae	MOL004912	Glabrone	Sodium channel protein type 5 subunit alpha	SCN5A
Glycyrrhizae	MOL004912	Glabrone	Peroxisome proliferator activated receptor gamma	PPARG
Glycyrrhizae	MOL004912	Glabrone	Coagulation factor Xa	F10
Glycyrrhizae	MOL004912	Glabrone	Prostaglandin G/H synthase 2	PTGS2
Glycyrrhizae	MOL004912	Glabrone	Retinoic acid receptor RXR-alpha	RXRA
Glycyrrhizae	MOL004912	Glabrone	Acetylcholinesterase	ACHE
Glycyrrhizae	MOL004912	Glabrone	Estrogen receptor beta	ESR2
Glycyrrhizae	MOL004912	Glabrone	Dipeptidyl peptidase IV	DPP4
Glycyrrhizae	MOL004912	Glabrone	Mitogen-activated protein kinase 14	MAPK14
Glycyrrhizae	MOL004912	Glabrone	Glycogen synthase kinase-3 beta	GSK3B
Glycyrrhizae	MOL004912	Glabrone	Cell division protein kinase 2	CDK2
Glycyrrhizae	MOL004912	Glabrone	Serine/threonine-protein kinase Chk1	CHEK1
Glycyrrhizae	MOL004912	Glabrone	Trypsin-1	PRSS1
Glycyrrhizae	MOL004912	Glabrone	Proto-oncogene serine/threonine-protein kinase Pim-1	PIM1
Glycyrrhizae	MOL004912	Glabrone	Cyclin-A2	CCNA2
Glycyrrhizae	MOL004912	Glabrone	Calmodulin	CaM
Glycyrrhizae	MOL004913	1,3-dihydroxy-9-methoxy-6-benzofurano[3,2-c]chromenone	Estrogen receptor	ESR1
Glycyrrhizae	MOL004913	1,3-dihydroxy-9-methoxy-6-benzofurano[3,2-c]chromenone	Peroxisome proliferator activated receptor gamma	PPARG
Glycyrrhizae	MOL004913	1,3-dihydroxy-9-methoxy-6-benzofurano[3,2-c]chromenone	Estrogen receptor beta	ESR2
Glycyrrhizae	MOL004913	1,3-dihydroxy-9-methoxy-6-benzofurano[3,2-c]chromenone	Mitogen-activated protein kinase 14	MAPK14
Glycyrrhizae	MOL004913	1,3-dihydroxy-9-methoxy-6-benzofurano[3,2-c]chromenone	Glycogen synthase kinase-3 beta	GSK3B
Glycyrrhizae	MOL004913	1,3-dihydroxy-9-methoxy-6-benzofurano[3,2-c]chromenone	Heat shock protein HSP 90	HSP90
Glycyrrhizae	MOL004913	1,3-dihydroxy-9-methoxy-6-benzofurano[3,2-c]chromenone	Cell division protein kinase 2	CDK2
Glycyrrhizae	MOL004913	1,3-dihydroxy-9-methoxy-6-benzofurano[3,2-c]chromenone	Serine/threonine-protein kinase Chk1	CHEK1
Glycyrrhizae	MOL004913	1,3-dihydroxy-9-methoxy-6-benzofurano[3,2-c]chromenone	mRNA of PKA Catalytic Subunit C-alpha	PKACA
Glycyrrhizae	MOL004913	1,3-dihydroxy-9-methoxy-6-benzofurano[3,2-c]chromenone	Cyclin-A2	CCNA2
Glycyrrhizae	MOL004914	1,3-dihydroxy-8,9-dimethoxy-6-benzofurano[3,2-c]chromenone	Estrogen receptor	ESR1
Glycyrrhizae	MOL004914	1,3-dihydroxy-8,9-dimethoxy-6-benzofurano[3,2-c]chromenone	Androgen receptor	AR
Glycyrrhizae	MOL004914	1,3-dihydroxy-8,9-dimethoxy-6-benzofurano[3,2-c]chromenone	Peroxisome proliferator activated receptor gamma	PPARG
Glycyrrhizae	MOL004914	1,3-dihydroxy-8,9-dimethoxy-6-benzofurano[3,2-c]chromenone	Mitogen-activated protein kinase 14	MAPK14
Glycyrrhizae	MOL004914	1,3-dihydroxy-8,9-dimethoxy-6-benzofurano[3,2-c]chromenone	Glycogen synthase kinase-3 beta	GSK3B
Glycyrrhizae	MOL004914	1,3-dihydroxy-8,9-dimethoxy-6-benzofurano[3,2-c]chromenone	Heat shock protein HSP 90	HSP90
Glycyrrhizae	MOL004914	1,3-dihydroxy-8,9-dimethoxy-6-benzofurano[3,2-c]chromenone	Cell division protein kinase 2	CDK2
Glycyrrhizae	MOL004914	1,3-dihydroxy-8,9-dimethoxy-6-benzofurano[3,2-c]chromenone	Serine/threonine-protein kinase Chk1	CHEK1
Glycyrrhizae	MOL004914	1,3-dihydroxy-8,9-dimethoxy-6-benzofurano[3,2-c]chromenone	mRNA of PKA Catalytic Subunit C-alpha	PKACA
Glycyrrhizae	MOL004915	Eurycarpin A	Nitric oxide synthase, inducible	NOS2
Glycyrrhizae	MOL004915	Eurycarpin A	Thrombin	Thrombin
Glycyrrhizae	MOL004915	Eurycarpin A	Estrogen receptor	ESR1
Glycyrrhizae	MOL004915	Eurycarpin A	Androgen receptor	AR
Glycyrrhizae	MOL004915	Eurycarpin A	Sodium channel protein type 5 subunit alpha	SCN5A
Glycyrrhizae	MOL004915	Eurycarpin A	Peroxisome proliferator activated receptor gamma	PPARG
Glycyrrhizae	MOL004915	Eurycarpin A	Coagulation factor Xa	F10
Glycyrrhizae	MOL004915	Eurycarpin A	Prostaglandin G/H synthase 2	PTGS2
Glycyrrhizae	MOL004915	Eurycarpin A	Estrogen receptor beta	ESR2
Glycyrrhizae	MOL004915	Eurycarpin A	Dipeptidyl peptidase IV	DPP4
Glycyrrhizae	MOL004915	Eurycarpin A	Mitogen-activated protein kinase 14	MAPK14
Glycyrrhizae	MOL004915	Eurycarpin A	Glycogen synthase kinase-3 beta	GSK3B
Glycyrrhizae	MOL004915	Eurycarpin A	Heat shock protein HSP 90	HSP90
Glycyrrhizae	MOL004915	Eurycarpin A	Cell division protein kinase 2	CDK2
Glycyrrhizae	MOL004915	Eurycarpin A	Serine/threonine-protein kinase Chk1	CHEK1
Glycyrrhizae	MOL004915	Eurycarpin A	Trypsin-1	PRSS1
Glycyrrhizae	MOL004915	Eurycarpin A	Proto-oncogene serine/threonine-protein kinase Pim-1	PIM1
Glycyrrhizae	MOL004915	Eurycarpin A	Cyclin-A2	CCNA2
Glycyrrhizae	MOL004915	Eurycarpin A	Calmodulin	CaM
Glycyrrhizae	MOL004935	Sigmoidin-B	Estrogen receptor	ESR1
Glycyrrhizae	MOL004935	Sigmoidin-B	Coagulation factor Xa	F10
Glycyrrhizae	MOL004935	Sigmoidin-B	Prostaglandin G/H synthase 2	PTGS2
Glycyrrhizae	MOL004935	Sigmoidin-B	Vascular endothelial growth factor receptor 2	KDR
Glycyrrhizae	MOL004935	Sigmoidin-B	Heat shock protein HSP 90	HSP90
Glycyrrhizae	MOL004935	Sigmoidin-B	Calmodulin	CaM
Glycyrrhizae	MOL004941	(2R)-7-hydroxy-2-(4-hydroxyphenyl)chroman-4-one	Prostaglandin G/H synthase 1	PTGS1
Glycyrrhizae	MOL004941	(2R)-7-hydroxy-2-(4-hydroxyphenyl)chroman-4-one	Estrogen receptor	ESR1
Glycyrrhizae	MOL004941	(2R)-7-hydroxy-2-(4-hydroxyphenyl)chroman-4-one	Prostaglandin G/H synthase 2	PTGS2
Glycyrrhizae	MOL004941	(2R)-7-hydroxy-2-(4-hydroxyphenyl)chroman-4-one	Retinoic acid receptor RXR-alpha	RXRA
Glycyrrhizae	MOL004941	(2R)-7-hydroxy-2-(4-hydroxyphenyl)chroman-4-one	CGMP-inhibited 3',5'-cyclic phosphodiesterase A	PDE3A
Glycyrrhizae	MOL004941	(2R)-7-hydroxy-2-(4-hydroxyphenyl)chroman-4-one	Beta-2 adrenergic receptor	ADRB2
Glycyrrhizae	MOL004941	(2R)-7-hydroxy-2-(4-hydroxyphenyl)chroman-4-one	Heat shock protein HSP 90	HSP90
Glycyrrhizae	MOL004941	(2R)-7-hydroxy-2-(4-hydroxyphenyl)chroman-4-one	Phosphatidylinositol-4,5-bisphosphate 3-kinase catalytic subunit, gamma isoform	PIK3CG
Glycyrrhizae	MOL004941	(2R)-7-hydroxy-2-(4-hydroxyphenyl)chroman-4-one	Beta-lactamase	ESBL
Glycyrrhizae	MOL004941	(2R)-7-hydroxy-2-(4-hydroxyphenyl)chroman-4-one	Amine oxidase [flavin-containing] B	MAOB
Glycyrrhizae	MOL004941	(2R)-7-hydroxy-2-(4-hydroxyphenyl)chroman-4-one	mRNA of PKA Catalytic Subunit C-alpha	PKACA
Glycyrrhizae	MOL004941	(2R)-7-hydroxy-2-(4-hydroxyphenyl)chroman-4-one	cAMP-dependent protein kinase inhibitor alpha	PKIA
Glycyrrhizae	MOL004941	(2R)-7-hydroxy-2-(4-hydroxyphenyl)chroman-4-one	Calmodulin	CaM
Glycyrrhizae	MOL004941	(2R)-7-hydroxy-2-(4-hydroxyphenyl)chroman-4-one	Gamma-aminobutyric acid receptor subunit alpha-1	GABRA1
Glycyrrhizae	MOL004941	(2R)-7-hydroxy-2-(4-hydroxyphenyl)chroman-4-one	Sodium-dependent serotonin transporter	SLC6A4
Glycyrrhizae	MOL004945	(2S)-7-hydroxy-2-(4-hydroxyphenyl)-8-(3-methylbut-2-enyl)chroman-4-one	Nitric oxide synthase, inducible	NOS2
Glycyrrhizae	MOL004945	(2S)-7-hydroxy-2-(4-hydroxyphenyl)-8-(3-methylbut-2-enyl)chroman-4-one	Prostaglandin G/H synthase 1	PTGS1
Glycyrrhizae	MOL004945	(2S)-7-hydroxy-2-(4-hydroxyphenyl)-8-(3-methylbut-2-enyl)chroman-4-one	Estrogen receptor	ESR1
Glycyrrhizae	MOL004945	(2S)-7-hydroxy-2-(4-hydroxyphenyl)-8-(3-methylbut-2-enyl)chroman-4-one	Sodium channel protein type 5 subunit alpha	SCN5A
Glycyrrhizae	MOL004945	(2S)-7-hydroxy-2-(4-hydroxyphenyl)-8-(3-methylbut-2-enyl)chroman-4-one	Coagulation factor Xa	F10
Glycyrrhizae	MOL004945	(2S)-7-hydroxy-2-(4-hydroxyphenyl)-8-(3-methylbut-2-enyl)chroman-4-one	Prostaglandin G/H synthase 2	PTGS2
Glycyrrhizae	MOL004945	(2S)-7-hydroxy-2-(4-hydroxyphenyl)-8-(3-methylbut-2-enyl)chroman-4-one	CGMP-inhibited 3',5'-cyclic phosphodiesterase A	PDE3A
Glycyrrhizae	MOL004945	(2S)-7-hydroxy-2-(4-hydroxyphenyl)-8-(3-methylbut-2-enyl)chroman-4-one	Alpha-1B adrenergic receptor	ADRA1B
Glycyrrhizae	MOL004945	(2S)-7-hydroxy-2-(4-hydroxyphenyl)-8-(3-methylbut-2-enyl)chroman-4-one	Beta-2 adrenergic receptor	ADRB2
Glycyrrhizae	MOL004945	(2S)-7-hydroxy-2-(4-hydroxyphenyl)-8-(3-methylbut-2-enyl)chroman-4-one	Estrogen receptor beta	ESR2
Glycyrrhizae	MOL004945	(2S)-7-hydroxy-2-(4-hydroxyphenyl)-8-(3-methylbut-2-enyl)chroman-4-one	Heat shock protein HSP 90	HSP90
Glycyrrhizae	MOL004945	(2S)-7-hydroxy-2-(4-hydroxyphenyl)-8-(3-methylbut-2-enyl)chroman-4-one	Calmodulin	CaM
Glycyrrhizae	MOL004948	Isoglycyrol	Nitric oxide synthase, inducible	NOS2
Glycyrrhizae	MOL004948	Isoglycyrol	Estrogen receptor	ESR1
Glycyrrhizae	MOL004948	Isoglycyrol	Androgen receptor	AR
Glycyrrhizae	MOL004948	Isoglycyrol	Prostaglandin G/H synthase 2	PTGS2
Glycyrrhizae	MOL004948	Isoglycyrol	Dipeptidyl peptidase IV	DPP4
Glycyrrhizae	MOL004948	Isoglycyrol	Glycogen synthase kinase-3 beta	GSK3B
Glycyrrhizae	MOL004948	Isoglycyrol	Proto-oncogene serine/threonine-protein kinase Pim-1	PIM1
Glycyrrhizae	MOL004949	Isolicoflavonol	Nitric oxide synthase, inducible	NOS2
Glycyrrhizae	MOL004949	Isolicoflavonol	Thrombin	Thrombin
Glycyrrhizae	MOL004949	Isolicoflavonol	Estrogen receptor	ESR1
Glycyrrhizae	MOL004949	Isolicoflavonol	Androgen receptor	AR
Glycyrrhizae	MOL004949	Isolicoflavonol	Peroxisome proliferator activated receptor gamma	PPARG
Glycyrrhizae	MOL004949	Isolicoflavonol	Coagulation factor Xa	F10
Glycyrrhizae	MOL004949	Isolicoflavonol	Prostaglandin G/H synthase 2	PTGS2
Glycyrrhizae	MOL004949	Isolicoflavonol	Glycogen synthase kinase-3 beta	GSK3B
Glycyrrhizae	MOL004949	Isolicoflavonol	Heat shock protein HSP 90	HSP90
Glycyrrhizae	MOL004949	Isolicoflavonol	Cell division protein kinase 2	CDK2
Glycyrrhizae	MOL004949	Isolicoflavonol	Trypsin-1	PRSS1
Glycyrrhizae	MOL004949	Isolicoflavonol	Proto-oncogene serine/threonine-protein kinase Pim-1	PIM1
Glycyrrhizae	MOL004949	Isolicoflavonol	Cyclin-A2	CCNA2
Glycyrrhizae	MOL004949	Isolicoflavonol	Nuclear receptor coactivator 2	NCOA2
Glycyrrhizae	MOL004949	Isolicoflavonol	Calmodulin	CaM
Glycyrrhizae	MOL004957	HMO	Nitric oxide synthase, inducible	NOS2
Glycyrrhizae	MOL004957	HMO	Prostaglandin G/H synthase 1	PTGS1
Glycyrrhizae	MOL004957	HMO	Muscarinic acetylcholine receptor M1	CHRM1
Glycyrrhizae	MOL004957	HMO	Estrogen receptor	ESR1
Glycyrrhizae	MOL004957	HMO	Androgen receptor	AR
Glycyrrhizae	MOL004957	HMO	Sodium channel protein type 5 subunit alpha	SCN5A
Glycyrrhizae	MOL004957	HMO	Peroxisome proliferator activated receptor gamma	PPARG
Glycyrrhizae	MOL004957	HMO	Prostaglandin G/H synthase 2	PTGS2
Glycyrrhizae	MOL004957	HMO	Retinoic acid receptor RXR-alpha	RXRA
Glycyrrhizae	MOL004957	HMO	CGMP-inhibited 3',5'-cyclic phosphodiesterase A	PDE3A
Glycyrrhizae	MOL004957	HMO	Sodium-dependent dopamine transporter	SLC6A3
Glycyrrhizae	MOL004957	HMO	Beta-2 adrenergic receptor	ADRB2
Glycyrrhizae	MOL004957	HMO	Sodium-dependent serotonin transporter	SLC6A4
Glycyrrhizae	MOL004957	HMO	Estrogen receptor beta	ESR2
Glycyrrhizae	MOL004957	HMO	Dipeptidyl peptidase IV	DPP4
Glycyrrhizae	MOL004957	HMO	Mitogen-activated protein kinase 14	MAPK14
Glycyrrhizae	MOL004957	HMO	Glycogen synthase kinase-3 beta	GSK3B
Glycyrrhizae	MOL004957	HMO	Cell division protein kinase 2	CDK2
Glycyrrhizae	MOL004957	HMO	Amine oxidase [flavin-containing] B	MAOB
Glycyrrhizae	MOL004957	HMO	Serine/threonine-protein kinase Chk1	CHEK1
Glycyrrhizae	MOL004957	HMO	mRNA of PKA Catalytic Subunit C-alpha	PKACA
Glycyrrhizae	MOL004957	HMO	Ig gamma-1 chain C region	Ighg1
Glycyrrhizae	MOL004957	HMO	Trypsin-1	PRSS1
Glycyrrhizae	MOL004957	HMO	Proto-oncogene serine/threonine-protein kinase Pim-1	PIM1
Glycyrrhizae	MOL004957	HMO	Cyclin-A2	CCNA2
Glycyrrhizae	MOL004957	HMO	cAMP-dependent protein kinase inhibitor alpha	PKIA
Glycyrrhizae	MOL004957	HMO	Calmodulin	CaM
Glycyrrhizae	MOL004959	1-Methoxyphaseollidin	Nitric oxide synthase, inducible	NOS2
Glycyrrhizae	MOL004959	1-Methoxyphaseollidin	Prostaglandin G/H synthase 1	PTGS1
Glycyrrhizae	MOL004959	1-Methoxyphaseollidin	Thrombin	Thrombin
Glycyrrhizae	MOL004959	1-Methoxyphaseollidin	Potassium voltage-gated channel subfamily H member 2	KCNH2
Glycyrrhizae	MOL004959	1-Methoxyphaseollidin	Estrogen receptor	ESR1
Glycyrrhizae	MOL004959	1-Methoxyphaseollidin	Androgen receptor	AR
Glycyrrhizae	MOL004959	1-Methoxyphaseollidin	Sodium channel protein type 5 subunit alpha	SCN5A
Glycyrrhizae	MOL004959	1-Methoxyphaseollidin	Peroxisome proliferator activated receptor gamma	PPARG
Glycyrrhizae	MOL004959	1-Methoxyphaseollidin	Coagulation factor Xa	F10
Glycyrrhizae	MOL004959	1-Methoxyphaseollidin	Prostaglandin G/H synthase 2	PTGS2
Glycyrrhizae	MOL004959	1-Methoxyphaseollidin	Nitric-oxide synthase, endothelial	NOS3
Glycyrrhizae	MOL004959	1-Methoxyphaseollidin	Vascular endothelial growth factor receptor 2	KDR
Glycyrrhizae	MOL004959	1-Methoxyphaseollidin	Retinoic acid receptor RXR-alpha	RXRA
Glycyrrhizae	MOL004959	1-Methoxyphaseollidin	Alpha-1B adrenergic receptor	ADRA1B
Glycyrrhizae	MOL004959	1-Methoxyphaseollidin	Beta-2 adrenergic receptor	ADRB2
Glycyrrhizae	MOL004959	1-Methoxyphaseollidin	Alpha-1D adrenergic receptor	ADRA1D
Glycyrrhizae	MOL004959	1-Methoxyphaseollidin	DNA topoisomerase II	TOP2
Glycyrrhizae	MOL004959	1-Methoxyphaseollidin	Estrogen receptor beta	ESR2
Glycyrrhizae	MOL004959	1-Methoxyphaseollidin	Mitogen-activated protein kinase 14	MAPK14
Glycyrrhizae	MOL004959	1-Methoxyphaseollidin	Glycogen synthase kinase-3 beta	GSK3B
Glycyrrhizae	MOL004959	1-Methoxyphaseollidin	Heat shock protein HSP 90	HSP90
Glycyrrhizae	MOL004959	1-Methoxyphaseollidin	Cell division protein kinase 2	CDK2
Glycyrrhizae	MOL004959	1-Methoxyphaseollidin	Phosphatidylinositol-4,5-bisphosphate 3-kinase catalytic subunit, gamma isoform	PIK3CG
Glycyrrhizae	MOL004959	1-Methoxyphaseollidin	Trypsin-1	PRSS1
Glycyrrhizae	MOL004959	1-Methoxyphaseollidin	Proto-oncogene serine/threonine-protein kinase Pim-1	PIM1
Glycyrrhizae	MOL004959	1-Methoxyphaseollidin	Cyclin-A2	CCNA2
Glycyrrhizae	MOL004959	1-Methoxyphaseollidin	Nuclear receptor coactivator 2	NCOA2
Glycyrrhizae	MOL004959	1-Methoxyphaseollidin	Nuclear receptor coactivator 1	NCOA1
Glycyrrhizae	MOL004959	1-Methoxyphaseollidin	Calmodulin	CaM
Glycyrrhizae	MOL004961	Quercetin der.	Nitric oxide synthase, inducible	NOS2
Glycyrrhizae	MOL004961	Quercetin der.	Prostaglandin G/H synthase 1	PTGS1
Glycyrrhizae	MOL004961	Quercetin der.	Estrogen receptor	ESR1
Glycyrrhizae	MOL004961	Quercetin der.	Androgen receptor	AR
Glycyrrhizae	MOL004961	Quercetin der.	Sodium channel protein type 5 subunit alpha	SCN5A
Glycyrrhizae	MOL004961	Quercetin der.	Peroxisome proliferator activated receptor gamma	PPARG
Glycyrrhizae	MOL004961	Quercetin der.	Prostaglandin G/H synthase 2	PTGS2
Glycyrrhizae	MOL004961	Quercetin der.	mRNA of Protein-tyrosine phosphatase, non-receptor type 1	PTPN1
Glycyrrhizae	MOL004961	Quercetin der.	Estrogen receptor beta	ESR2
Glycyrrhizae	MOL004961	Quercetin der.	Dipeptidyl peptidase IV	DPP4
Glycyrrhizae	MOL004961	Quercetin der.	Mitogen-activated protein kinase 14	MAPK14
Glycyrrhizae	MOL004961	Quercetin der.	Glycogen synthase kinase-3 beta	GSK3B
Glycyrrhizae	MOL004961	Quercetin der.	Heat shock protein HSP 90	HSP90
Glycyrrhizae	MOL004961	Quercetin der.	Cell division protein kinase 2	CDK2
Glycyrrhizae	MOL004961	Quercetin der.	Trypsin-1	PRSS1
Glycyrrhizae	MOL004961	Quercetin der.	Nuclear receptor coactivator 2	NCOA2
Glycyrrhizae	MOL004961	Quercetin der.	Calmodulin	CaM
Glycyrrhizae	MOL004966	3'-Hydroxy-4'-O-Methylglabridin	Nitric oxide synthase, inducible	NOS2
Glycyrrhizae	MOL004966	3'-Hydroxy-4'-O-Methylglabridin	Prostaglandin G/H synthase 1	PTGS1
Glycyrrhizae	MOL004966	3'-Hydroxy-4'-O-Methylglabridin	Potassium voltage-gated channel subfamily H member 2	KCNH2
Glycyrrhizae	MOL004966	3'-Hydroxy-4'-O-Methylglabridin	Estrogen receptor	ESR1
Glycyrrhizae	MOL004966	3'-Hydroxy-4'-O-Methylglabridin	Androgen receptor	AR
Glycyrrhizae	MOL004966	3'-Hydroxy-4'-O-Methylglabridin	Sodium channel protein type 5 subunit alpha	SCN5A
Glycyrrhizae	MOL004966	3'-Hydroxy-4'-O-Methylglabridin	Peroxisome proliferator activated receptor gamma	PPARG
Glycyrrhizae	MOL004966	3'-Hydroxy-4'-O-Methylglabridin	Coagulation factor Xa	F10
Glycyrrhizae	MOL004966	3'-Hydroxy-4'-O-Methylglabridin	Prostaglandin G/H synthase 2	PTGS2
Glycyrrhizae	MOL004966	3'-Hydroxy-4'-O-Methylglabridin	Coagulation factor VII	F7
Glycyrrhizae	MOL004966	3'-Hydroxy-4'-O-Methylglabridin	Vascular endothelial growth factor receptor 2	KDR
Glycyrrhizae	MOL004966	3'-Hydroxy-4'-O-Methylglabridin	Alpha-1B adrenergic receptor	ADRA1B
Glycyrrhizae	MOL004966	3'-Hydroxy-4'-O-Methylglabridin	Beta-2 adrenergic receptor	ADRB2
Glycyrrhizae	MOL004966	3'-Hydroxy-4'-O-Methylglabridin	DNA topoisomerase II	TOP2
Glycyrrhizae	MOL004966	3'-Hydroxy-4'-O-Methylglabridin	Estrogen receptor beta	ESR2
Glycyrrhizae	MOL004966	3'-Hydroxy-4'-O-Methylglabridin	Mitogen-activated protein kinase 14	MAPK14
Glycyrrhizae	MOL004966	3'-Hydroxy-4'-O-Methylglabridin	Glycogen synthase kinase-3 beta	GSK3B
Glycyrrhizae	MOL004966	3'-Hydroxy-4'-O-Methylglabridin	Heat shock protein HSP 90	HSP90
Glycyrrhizae	MOL004966	3'-Hydroxy-4'-O-Methylglabridin	Cell division protein kinase 2	CDK2
Glycyrrhizae	MOL004966	3'-Hydroxy-4'-O-Methylglabridin	Serine/threonine-protein kinase Chk1	CHEK1
Glycyrrhizae	MOL004966	3'-Hydroxy-4'-O-Methylglabridin	mRNA of PKA Catalytic Subunit C-alpha	PKACA
Glycyrrhizae	MOL004966	3'-Hydroxy-4'-O-Methylglabridin	Trypsin-1	PRSS1
Glycyrrhizae	MOL004966	3'-Hydroxy-4'-O-Methylglabridin	Proto-oncogene serine/threonine-protein kinase Pim-1	PIM1
Glycyrrhizae	MOL004966	3'-Hydroxy-4'-O-Methylglabridin	Cyclin-A2	CCNA2
Glycyrrhizae	MOL004966	3'-Hydroxy-4'-O-Methylglabridin	Nuclear receptor coactivator 2	NCOA2
Glycyrrhizae	MOL004966	3'-Hydroxy-4'-O-Methylglabridin	Nuclear receptor coactivator 1	NCOA1
Glycyrrhizae	MOL004966	3'-Hydroxy-4'-O-Methylglabridin	Calcium-activated potassium channel subunit alpha 1	KCNMA1
Glycyrrhizae	MOL004966	3'-Hydroxy-4'-O-Methylglabridin	Calmodulin	CaM
Glycyrrhizae	MOL000497	licochalcone a	Nitric oxide synthase, inducible	NOS2
Glycyrrhizae	MOL000497	licochalcone a	Prostaglandin G/H synthase 1	PTGS1
Glycyrrhizae	MOL000497	licochalcone a	Muscarinic acetylcholine receptor M1	CHRM1
Glycyrrhizae	MOL000497	licochalcone a	Estrogen receptor	ESR1
Glycyrrhizae	MOL000497	licochalcone a	Androgen receptor	AR
Glycyrrhizae	MOL000497	licochalcone a	Sodium channel protein type 5 subunit alpha	SCN5A
Glycyrrhizae	MOL000497	licochalcone a	Peroxisome proliferator activated receptor gamma	PPARG
Glycyrrhizae	MOL000497	licochalcone a	Coagulation factor Xa	F10
Glycyrrhizae	MOL000497	licochalcone a	Prostaglandin G/H synthase 2	PTGS2
Glycyrrhizae	MOL000497	licochalcone a	Carbonic anhydrase II	CA2
Glycyrrhizae	MOL000497	licochalcone a	Alpha-1B adrenergic receptor	ADRA1B
Glycyrrhizae	MOL000497	licochalcone a	Sodium-dependent dopamine transporter	SLC6A3
Glycyrrhizae	MOL000497	licochalcone a	Estrogen receptor beta	ESR2
Glycyrrhizae	MOL000497	licochalcone a	Mitogen-activated protein kinase 14	MAPK14
Glycyrrhizae	MOL000497	licochalcone a	Glycogen synthase kinase-3 beta	GSK3B
Glycyrrhizae	MOL000497	licochalcone a	Heat shock protein HSP 90	HSP90
Glycyrrhizae	MOL000497	licochalcone a	Cell division protein kinase 2	CDK2
Glycyrrhizae	MOL000497	licochalcone a	Serine/threonine-protein kinase Chk1	CHEK1
Glycyrrhizae	MOL000497	licochalcone a	Proto-oncogene serine/threonine-protein kinase Pim-1	PIM1
Glycyrrhizae	MOL000497	licochalcone a	Cyclin-A2	CCNA2
Glycyrrhizae	MOL000497	licochalcone a	Calmodulin	CaM
Glycyrrhizae	MOL000497	licochalcone a	Beta-2 adrenergic receptor	ADRB2
Glycyrrhizae	MOL000497	licochalcone a	Nuclear receptor coactivator 2	NCOA2
Glycyrrhizae	MOL000497	licochalcone a	Transcription factor p65	RELA
Glycyrrhizae	MOL000497	licochalcone a	Signal transducer and activator of transcription 3	STAT3
Glycyrrhizae	MOL000497	licochalcone a	G1/S-specific cyclin-D1	CCND1
Glycyrrhizae	MOL000497	licochalcone a	Apoptosis regulator Bcl-2	BCL2
Glycyrrhizae	MOL000497	licochalcone a	Eukaryotic translation initiation factor 6	EIF6
Glycyrrhizae	MOL000497	licochalcone a	Mitogen-activated protein kinase 1	MAPK1
Glycyrrhizae	MOL000497	licochalcone a	Retinoblastoma-associated protein	RB1
Glycyrrhizae	MOL000497	licochalcone a	Cell division protein kinase 4	CDK4
Glycyrrhizae	MOL000497	licochalcone a	Fos-related antigen 2	FOSL2
Glycyrrhizae	MOL004974	3'-Methoxyglabridin	Nitric oxide synthase, inducible	NOS2
Glycyrrhizae	MOL004974	3'-Methoxyglabridin	Prostaglandin G/H synthase 1	PTGS1
Glycyrrhizae	MOL004974	3'-Methoxyglabridin	Potassium voltage-gated channel subfamily H member 2	KCNH2
Glycyrrhizae	MOL004974	3'-Methoxyglabridin	Estrogen receptor	ESR1
Glycyrrhizae	MOL004974	3'-Methoxyglabridin	Androgen receptor	AR
Glycyrrhizae	MOL004974	3'-Methoxyglabridin	Sodium channel protein type 5 subunit alpha	SCN5A
Glycyrrhizae	MOL004974	3'-Methoxyglabridin	Peroxisome proliferator activated receptor gamma	PPARG
Glycyrrhizae	MOL004974	3'-Methoxyglabridin	Coagulation factor Xa	F10
Glycyrrhizae	MOL004974	3'-Methoxyglabridin	Prostaglandin G/H synthase 2	PTGS2
Glycyrrhizae	MOL004974	3'-Methoxyglabridin	Coagulation factor VII	F7
Glycyrrhizae	MOL004974	3'-Methoxyglabridin	Retinoic acid receptor RXR-alpha	RXRA
Glycyrrhizae	MOL004974	3'-Methoxyglabridin	Acetylcholinesterase	ACHE
Glycyrrhizae	MOL004974	3'-Methoxyglabridin	Alpha-1B adrenergic receptor	ADRA1B
Glycyrrhizae	MOL004974	3'-Methoxyglabridin	Beta-2 adrenergic receptor	ADRB2
Glycyrrhizae	MOL004974	3'-Methoxyglabridin	DNA topoisomerase II	TOP2
Glycyrrhizae	MOL004974	3'-Methoxyglabridin	Estrogen receptor beta	ESR2
Glycyrrhizae	MOL004974	3'-Methoxyglabridin	Mitogen-activated protein kinase 14	MAPK14
Glycyrrhizae	MOL004974	3'-Methoxyglabridin	Glycogen synthase kinase-3 beta	GSK3B
Glycyrrhizae	MOL004974	3'-Methoxyglabridin	Heat shock protein HSP 90	HSP90
Glycyrrhizae	MOL004974	3'-Methoxyglabridin	Cell division protein kinase 2	CDK2
Glycyrrhizae	MOL004974	3'-Methoxyglabridin	Serine/threonine-protein kinase Chk1	CHEK1
Glycyrrhizae	MOL004974	3'-Methoxyglabridin	Trypsin-1	PRSS1
Glycyrrhizae	MOL004974	3'-Methoxyglabridin	Proto-oncogene serine/threonine-protein kinase Pim-1	PIM1
Glycyrrhizae	MOL004974	3'-Methoxyglabridin	Cyclin-A2	CCNA2
Glycyrrhizae	MOL004974	3'-Methoxyglabridin	Nuclear receptor coactivator 2	NCOA2
Glycyrrhizae	MOL004974	3'-Methoxyglabridin	Nuclear receptor coactivator 1	NCOA1
Glycyrrhizae	MOL004974	3'-Methoxyglabridin	Calcium-activated potassium channel subunit alpha 1	KCNMA1
Glycyrrhizae	MOL004974	3'-Methoxyglabridin	Calmodulin	CaM
Glycyrrhizae	MOL004978	2-[(3R)-8,8-dimethyl-3,4-dihydro-2H-pyrano[6,5-f]chromen-3-yl]-5-methoxyphenol	Nitric oxide synthase, inducible	NOS2
Glycyrrhizae	MOL004978	2-[(3R)-8,8-dimethyl-3,4-dihydro-2H-pyrano[6,5-f]chromen-3-yl]-5-methoxyphenol	Prostaglandin G/H synthase 1	PTGS1
Glycyrrhizae	MOL004978	2-[(3R)-8,8-dimethyl-3,4-dihydro-2H-pyrano[6,5-f]chromen-3-yl]-5-methoxyphenol	Muscarinic acetylcholine receptor M3	CHRM3
Glycyrrhizae	MOL004978	2-[(3R)-8,8-dimethyl-3,4-dihydro-2H-pyrano[6,5-f]chromen-3-yl]-5-methoxyphenol	Potassium voltage-gated channel subfamily H member 2	KCNH2
Glycyrrhizae	MOL004978	2-[(3R)-8,8-dimethyl-3,4-dihydro-2H-pyrano[6,5-f]chromen-3-yl]-5-methoxyphenol	Muscarinic acetylcholine receptor M1	CHRM1
Glycyrrhizae	MOL004978	2-[(3R)-8,8-dimethyl-3,4-dihydro-2H-pyrano[6,5-f]chromen-3-yl]-5-methoxyphenol	Estrogen receptor	ESR1
Glycyrrhizae	MOL004978	2-[(3R)-8,8-dimethyl-3,4-dihydro-2H-pyrano[6,5-f]chromen-3-yl]-5-methoxyphenol	Androgen receptor	AR
Glycyrrhizae	MOL004978	2-[(3R)-8,8-dimethyl-3,4-dihydro-2H-pyrano[6,5-f]chromen-3-yl]-5-methoxyphenol	Sodium channel protein type 5 subunit alpha	SCN5A
Glycyrrhizae	MOL004978	2-[(3R)-8,8-dimethyl-3,4-dihydro-2H-pyrano[6,5-f]chromen-3-yl]-5-methoxyphenol	Peroxisome proliferator activated receptor gamma	PPARG
Glycyrrhizae	MOL004978	2-[(3R)-8,8-dimethyl-3,4-dihydro-2H-pyrano[6,5-f]chromen-3-yl]-5-methoxyphenol	Coagulation factor Xa	F10
Glycyrrhizae	MOL004978	2-[(3R)-8,8-dimethyl-3,4-dihydro-2H-pyrano[6,5-f]chromen-3-yl]-5-methoxyphenol	Prostaglandin G/H synthase 2	PTGS2
Glycyrrhizae	MOL004978	2-[(3R)-8,8-dimethyl-3,4-dihydro-2H-pyrano[6,5-f]chromen-3-yl]-5-methoxyphenol	Nitric-oxide synthase, endothelial	NOS3
Glycyrrhizae	MOL004978	2-[(3R)-8,8-dimethyl-3,4-dihydro-2H-pyrano[6,5-f]chromen-3-yl]-5-methoxyphenol	Retinoic acid receptor RXR-alpha	RXRA
Glycyrrhizae	MOL004978	2-[(3R)-8,8-dimethyl-3,4-dihydro-2H-pyrano[6,5-f]chromen-3-yl]-5-methoxyphenol	Acetylcholinesterase	ACHE
Glycyrrhizae	MOL004978	2-[(3R)-8,8-dimethyl-3,4-dihydro-2H-pyrano[6,5-f]chromen-3-yl]-5-methoxyphenol	Alpha-1B adrenergic receptor	ADRA1B
Glycyrrhizae	MOL004978	2-[(3R)-8,8-dimethyl-3,4-dihydro-2H-pyrano[6,5-f]chromen-3-yl]-5-methoxyphenol	Sodium-dependent dopamine transporter	SLC6A3
Glycyrrhizae	MOL004978	2-[(3R)-8,8-dimethyl-3,4-dihydro-2H-pyrano[6,5-f]chromen-3-yl]-5-methoxyphenol	Beta-2 adrenergic receptor	ADRB2
Glycyrrhizae	MOL004978	2-[(3R)-8,8-dimethyl-3,4-dihydro-2H-pyrano[6,5-f]chromen-3-yl]-5-methoxyphenol	Estrogen receptor beta	ESR2
Glycyrrhizae	MOL004978	2-[(3R)-8,8-dimethyl-3,4-dihydro-2H-pyrano[6,5-f]chromen-3-yl]-5-methoxyphenol	Mitogen-activated protein kinase 14	MAPK14
Glycyrrhizae	MOL004978	2-[(3R)-8,8-dimethyl-3,4-dihydro-2H-pyrano[6,5-f]chromen-3-yl]-5-methoxyphenol	Glycogen synthase kinase-3 beta	GSK3B
Glycyrrhizae	MOL004978	2-[(3R)-8,8-dimethyl-3,4-dihydro-2H-pyrano[6,5-f]chromen-3-yl]-5-methoxyphenol	Cell division protein kinase 2	CDK2
Glycyrrhizae	MOL004978	2-[(3R)-8,8-dimethyl-3,4-dihydro-2H-pyrano[6,5-f]chromen-3-yl]-5-methoxyphenol	Serine/threonine-protein kinase Chk1	CHEK1
Glycyrrhizae	MOL004978	2-[(3R)-8,8-dimethyl-3,4-dihydro-2H-pyrano[6,5-f]chromen-3-yl]-5-methoxyphenol	mRNA of PKA Catalytic Subunit C-alpha	PKACA
Glycyrrhizae	MOL004978	2-[(3R)-8,8-dimethyl-3,4-dihydro-2H-pyrano[6,5-f]chromen-3-yl]-5-methoxyphenol	Retinoic acid receptor RXR-beta	RXRB
Glycyrrhizae	MOL004978	2-[(3R)-8,8-dimethyl-3,4-dihydro-2H-pyrano[6,5-f]chromen-3-yl]-5-methoxyphenol	Trypsin-1	PRSS1
Glycyrrhizae	MOL004978	2-[(3R)-8,8-dimethyl-3,4-dihydro-2H-pyrano[6,5-f]chromen-3-yl]-5-methoxyphenol	Proto-oncogene serine/threonine-protein kinase Pim-1	PIM1
Glycyrrhizae	MOL004978	2-[(3R)-8,8-dimethyl-3,4-dihydro-2H-pyrano[6,5-f]chromen-3-yl]-5-methoxyphenol	Cyclin-A2	CCNA2
Glycyrrhizae	MOL004978	2-[(3R)-8,8-dimethyl-3,4-dihydro-2H-pyrano[6,5-f]chromen-3-yl]-5-methoxyphenol	Nuclear receptor coactivator 2	NCOA2
Glycyrrhizae	MOL004978	2-[(3R)-8,8-dimethyl-3,4-dihydro-2H-pyrano[6,5-f]chromen-3-yl]-5-methoxyphenol	Nuclear receptor coactivator 1	NCOA1
Glycyrrhizae	MOL004978	2-[(3R)-8,8-dimethyl-3,4-dihydro-2H-pyrano[6,5-f]chromen-3-yl]-5-methoxyphenol	Calcium-activated potassium channel subunit alpha 1	KCNMA1
Glycyrrhizae	MOL004978	2-[(3R)-8,8-dimethyl-3,4-dihydro-2H-pyrano[6,5-f]chromen-3-yl]-5-methoxyphenol	Calmodulin	CaM
Glycyrrhizae	MOL004980	Inflacoumarin A	Thrombin	Thrombin
Glycyrrhizae	MOL004980	Inflacoumarin A	Estrogen receptor	ESR1
Glycyrrhizae	MOL004980	Inflacoumarin A	Androgen receptor	AR
Glycyrrhizae	MOL004980	Inflacoumarin A	Peroxisome proliferator activated receptor gamma	PPARG
Glycyrrhizae	MOL004980	Inflacoumarin A	Coagulation factor Xa	F10
Glycyrrhizae	MOL004980	Inflacoumarin A	Prostaglandin G/H synthase 2	PTGS2
Glycyrrhizae	MOL004980	Inflacoumarin A	Beta-2 adrenergic receptor	ADRB2
Glycyrrhizae	MOL004980	Inflacoumarin A	Dipeptidyl peptidase IV	DPP4
Glycyrrhizae	MOL004980	Inflacoumarin A	Heat shock protein HSP 90	HSP90
Glycyrrhizae	MOL004980	Inflacoumarin A	Trypsin-1	PRSS1
Glycyrrhizae	MOL004980	Inflacoumarin A	Proto-oncogene serine/threonine-protein kinase Pim-1	PIM1
Glycyrrhizae	MOL004980	Inflacoumarin A	Nuclear receptor coactivator 2	NCOA2
Glycyrrhizae	MOL004980	Inflacoumarin A	Calmodulin	CaM
Glycyrrhizae	MOL004980	Inflacoumarin A	Prostaglandin G/H synthase 1	PTGS1
Glycyrrhizae	MOL004980	Inflacoumarin A	Sodium channel protein type 5 subunit alpha	SCN5A
Glycyrrhizae	MOL004985	icos-5-enoic acid	Nuclear receptor coactivator 2	NCOA2
Glycyrrhizae	MOL004988	Kanzonol F	Androgen receptor	AR
Glycyrrhizae	MOL004988	Kanzonol F	Calmodulin	CaM
Glycyrrhizae	MOL004988	Kanzonol F	Coagulation factor Xa	F10
Glycyrrhizae	MOL004988	Kanzonol F	Estrogen receptor	ESR1
Glycyrrhizae	MOL004988	Kanzonol F	Estrogen receptor beta	ESR2
Glycyrrhizae	MOL004988	Kanzonol F	Nuclear receptor coactivator 2	NCOA2
Glycyrrhizae	MOL004988	Kanzonol F	Prostaglandin G/H synthase 2	PTGS2
Glycyrrhizae	MOL004988	Kanzonol F	Proto-oncogene serine/threonine-protein kinase Pim-1	PIM1
Glycyrrhizae	MOL004989	6-prenylated eriodictyol	Calmodulin	CaM
Glycyrrhizae	MOL004989	6-prenylated eriodictyol	Coagulation factor VII	F7
Glycyrrhizae	MOL004989	6-prenylated eriodictyol	Coagulation factor Xa	F10
Glycyrrhizae	MOL004989	6-prenylated eriodictyol	Estrogen receptor	ESR1
Glycyrrhizae	MOL004989	6-prenylated eriodictyol	Heat shock protein HSP 90	HSP90
Glycyrrhizae	MOL004989	6-prenylated eriodictyol	Nitric oxide synthase, inducible	NOS2
Glycyrrhizae	MOL004989	6-prenylated eriodictyol	Prostaglandin G/H synthase 2	PTGS2
Glycyrrhizae	MOL004989	6-prenylated eriodictyol	Sodium channel protein type 5 subunit alpha	SCN5A
Glycyrrhizae	MOL004990	7,2',4'-trihydroxy－5-methoxy-3－arylcoumarin	Androgen receptor	AR
Glycyrrhizae	MOL004990	7,2',4'-trihydroxy－5-methoxy-3－arylcoumarin	Cell division protein kinase 2	CDK2
Glycyrrhizae	MOL004990	7,2',4'-trihydroxy－5-methoxy-3－arylcoumarin	Dipeptidyl peptidase IV	DPP4
Glycyrrhizae	MOL004990	7,2',4'-trihydroxy－5-methoxy-3－arylcoumarin	Estrogen receptor	ESR1
Glycyrrhizae	MOL004990	7,2',4'-trihydroxy－5-methoxy-3－arylcoumarin	Estrogen receptor beta	ESR2
Glycyrrhizae	MOL004990	7,2',4'-trihydroxy－5-methoxy-3－arylcoumarin	Glycogen synthase kinase-3 beta	GSK3B
Glycyrrhizae	MOL004990	7,2',4'-trihydroxy－5-methoxy-3－arylcoumarin	Heat shock protein HSP 90	HSP90
Glycyrrhizae	MOL004990	7,2',4'-trihydroxy－5-methoxy-3－arylcoumarin	Mitogen-activated protein kinase 14	MAPK14
Glycyrrhizae	MOL004990	7,2',4'-trihydroxy－5-methoxy-3－arylcoumarin	mRNA of PKA Catalytic Subunit C-alpha	PKACA
Glycyrrhizae	MOL004990	7,2',4'-trihydroxy－5-methoxy-3－arylcoumarin	Nitric oxide synthase, inducible	NOS2
Glycyrrhizae	MOL004990	7,2',4'-trihydroxy－5-methoxy-3－arylcoumarin	Peroxisome proliferator activated receptor gamma	PPARG
Glycyrrhizae	MOL004990	7,2',4'-trihydroxy－5-methoxy-3－arylcoumarin	Prostaglandin G/H synthase 1	PTGS1
Glycyrrhizae	MOL004990	7,2',4'-trihydroxy－5-methoxy-3－arylcoumarin	Prostaglandin G/H synthase 2	PTGS2
Glycyrrhizae	MOL004990	7,2',4'-trihydroxy－5-methoxy-3－arylcoumarin	Proto-oncogene serine/threonine-protein kinase Pim-1	PIM1
Glycyrrhizae	MOL004990	7,2',4'-trihydroxy－5-methoxy-3－arylcoumarin	Serine/threonine-protein kinase Chk1	CHEK1
Glycyrrhizae	MOL004991	7-Acetoxy-2-methylisoflavone	Acetylcholinesterase	ACHE
Glycyrrhizae	MOL004991	7-Acetoxy-2-methylisoflavone	Alpha-1B adrenergic receptor	ADRA1B
Glycyrrhizae	MOL004991	7-Acetoxy-2-methylisoflavone	Alpha-1D adrenergic receptor	ADRA1D
Glycyrrhizae	MOL004991	7-Acetoxy-2-methylisoflavone	Androgen receptor	AR
Glycyrrhizae	MOL004991	7-Acetoxy-2-methylisoflavone	Beta-2 adrenergic receptor	ADRB2
Glycyrrhizae	MOL004991	7-Acetoxy-2-methylisoflavone	Calmodulin	CaM
Glycyrrhizae	MOL004991	7-Acetoxy-2-methylisoflavone	Cell division protein kinase 2	CDK2
Glycyrrhizae	MOL004991	7-Acetoxy-2-methylisoflavone	CGMP-inhibited 3',5'-cyclic phosphodiesterase A	PDE3A
Glycyrrhizae	MOL004991	7-Acetoxy-2-methylisoflavone	Dipeptidyl peptidase IV	DPP4
Glycyrrhizae	MOL004991	7-Acetoxy-2-methylisoflavone	Estrogen receptor	ESR1
Glycyrrhizae	MOL004991	7-Acetoxy-2-methylisoflavone	Gamma-aminobutyric acid receptor subunit alpha-1	GABRA1
Glycyrrhizae	MOL004991	7-Acetoxy-2-methylisoflavone	Glycogen synthase kinase-3 beta	GSK3B
Glycyrrhizae	MOL004991	7-Acetoxy-2-methylisoflavone	Heat shock protein HSP 90	HSP90
Glycyrrhizae	MOL004991	7-Acetoxy-2-methylisoflavone	Mitogen-activated protein kinase 14	MAPK14
Glycyrrhizae	MOL004991	7-Acetoxy-2-methylisoflavone	Nitric oxide synthase, inducible	NOS2
Glycyrrhizae	MOL004991	7-Acetoxy-2-methylisoflavone	Nitric-oxide synthase, endothelial	NOS3
Glycyrrhizae	MOL004991	7-Acetoxy-2-methylisoflavone	Nuclear receptor coactivator 2	NCOA2
Glycyrrhizae	MOL004991	7-Acetoxy-2-methylisoflavone	Peroxisome proliferator activated receptor gamma	PPARG
Glycyrrhizae	MOL004991	7-Acetoxy-2-methylisoflavone	Prostaglandin G/H synthase 1	PTGS1
Glycyrrhizae	MOL004991	7-Acetoxy-2-methylisoflavone	Prostaglandin G/H synthase 2	PTGS2
Glycyrrhizae	MOL004991	7-Acetoxy-2-methylisoflavone	Retinoic acid receptor RXR-alpha	RXRA
Glycyrrhizae	MOL004991	7-Acetoxy-2-methylisoflavone	Serine/threonine-protein kinase Chk1	CHEK1
Glycyrrhizae	MOL004991	7-Acetoxy-2-methylisoflavone	Sodium channel protein type 5 subunit alpha	SCN5A
Glycyrrhizae	MOL004991	7-Acetoxy-2-methylisoflavone	Thrombin	Thrombin
Glycyrrhizae	MOL004991	7-Acetoxy-2-methylisoflavone	Trypsin-1	PRSS1
Glycyrrhizae	MOL004993	8-prenylated eriodictyol	Calmodulin	CaM
Glycyrrhizae	MOL004993	8-prenylated eriodictyol	Coagulation factor VII	F7
Glycyrrhizae	MOL004993	8-prenylated eriodictyol	Coagulation factor Xa	F10
Glycyrrhizae	MOL004993	8-prenylated eriodictyol	Estrogen receptor	ESR1
Glycyrrhizae	MOL004993	8-prenylated eriodictyol	Heat shock protein HSP 90	HSP90
Glycyrrhizae	MOL004993	8-prenylated eriodictyol	Nuclear receptor coactivator 1	NCOA1
Glycyrrhizae	MOL004993	8-prenylated eriodictyol	Prostaglandin G/H synthase 2	PTGS2
Glycyrrhizae	MOL004993	8-prenylated eriodictyol	Sodium channel protein type 5 subunit alpha	SCN5A
Glycyrrhizae	MOL004996	gadelaidic acid	Nuclear receptor coactivator 2	NCOA2
Glycyrrhizae	MOL000500	Vestitol	5-hydroxytryptamine 2A receptor	HTR2A
Glycyrrhizae	MOL000500	Vestitol	Alpha-1A adrenergic receptor	ADRA1A
Glycyrrhizae	MOL000500	Vestitol	Alpha-1B adrenergic receptor	ADRA1B
Glycyrrhizae	MOL000500	Vestitol	Androgen receptor	AR
Glycyrrhizae	MOL000500	Vestitol	Beta-2 adrenergic receptor	ADRB2
Glycyrrhizae	MOL000500	Vestitol	Calmodulin	CaM
Glycyrrhizae	MOL000500	Vestitol	cAMP-dependent protein kinase inhibitor alpha	PKIA
Glycyrrhizae	MOL000500	Vestitol	Cell division protein kinase 2	CDK2
Glycyrrhizae	MOL000500	Vestitol	CGMP-inhibited 3',5'-cyclic phosphodiesterase A	PDE3A
Glycyrrhizae	MOL000500	Vestitol	Cyclin-A2	CCNA2
Glycyrrhizae	MOL000500	Vestitol	Dipeptidyl peptidase IV	DPP4
Glycyrrhizae	MOL000500	Vestitol	Estrogen receptor	ESR1
Glycyrrhizae	MOL000500	Vestitol	Estrogen receptor beta	ESR2
Glycyrrhizae	MOL000500	Vestitol	Glycogen synthase kinase-3 beta	GSK3B
Glycyrrhizae	MOL000500	Vestitol	Heat shock protein HSP 90	HSP90
Glycyrrhizae	MOL000500	Vestitol	Mitogen-activated protein kinase 14	MAPK14
Glycyrrhizae	MOL000500	Vestitol	mRNA of PKA Catalytic Subunit C-alpha	PKACA
Glycyrrhizae	MOL000500	Vestitol	Muscarinic acetylcholine receptor M1	CHRM1
Glycyrrhizae	MOL000500	Vestitol	Muscarinic acetylcholine receptor M4	CHRM4
Glycyrrhizae	MOL000500	Vestitol	Nitric oxide synthase, inducible	NOS2
Glycyrrhizae	MOL000500	Vestitol	Peroxisome proliferator activated receptor gamma	PPARG
Glycyrrhizae	MOL000500	Vestitol	Prostaglandin G/H synthase 1	PTGS1
Glycyrrhizae	MOL000500	Vestitol	Prostaglandin G/H synthase 2	PTGS2
Glycyrrhizae	MOL000500	Vestitol	Proto-oncogene serine/threonine-protein kinase Pim-1	PIM1
Glycyrrhizae	MOL000500	Vestitol	Retinoic acid receptor RXR-alpha	RXRA
Glycyrrhizae	MOL000500	Vestitol	Serine/threonine-protein kinase Chk1	CHEK1
Glycyrrhizae	MOL000500	Vestitol	Sodium channel protein type 5 subunit alpha	SCN5A
Glycyrrhizae	MOL000500	Vestitol	Sodium-dependent dopamine transporter	SLC6A3
Glycyrrhizae	MOL000500	Vestitol	Sodium-dependent serotonin transporter	SLC6A4
Glycyrrhizae	MOL000500	Vestitol	Trypsin-1	PRSS1
Glycyrrhizae	MOL005000	Gancaonin G	Androgen receptor	AR
Glycyrrhizae	MOL005000	Gancaonin G	Calmodulin	CaM
Glycyrrhizae	MOL005000	Gancaonin G	Coagulation factor Xa	F10
Glycyrrhizae	MOL005000	Gancaonin G	Cyclin-A2	CCNA2
Glycyrrhizae	MOL005000	Gancaonin G	Dipeptidyl peptidase IV	DPP4
Glycyrrhizae	MOL005000	Gancaonin G	DNA topoisomerase II	TOP2
Glycyrrhizae	MOL005000	Gancaonin G	Estrogen receptor	ESR1
Glycyrrhizae	MOL005000	Gancaonin G	Estrogen receptor beta	ESR2
Glycyrrhizae	MOL005000	Gancaonin G	Glycogen synthase kinase-3 beta	GSK3B
Glycyrrhizae	MOL005000	Gancaonin G	Heat shock protein HSP 90	HSP90
Glycyrrhizae	MOL005000	Gancaonin G	Mitogen-activated protein kinase 14	MAPK14
Glycyrrhizae	MOL005000	Gancaonin G	Nitric oxide synthase, inducible	NOS2
Glycyrrhizae	MOL005000	Gancaonin G	Nitric-oxide synthase, endothelial	NOS3
Glycyrrhizae	MOL005000	Gancaonin G	Nuclear receptor coactivator 2	NCOA2
Glycyrrhizae	MOL005000	Gancaonin G	Peroxisome proliferator activated receptor gamma	PPARG
Glycyrrhizae	MOL005000	Gancaonin G	Prostaglandin G/H synthase 2	PTGS2
Glycyrrhizae	MOL005000	Gancaonin G	Proto-oncogene serine/threonine-protein kinase Pim-1	PIM1
Glycyrrhizae	MOL005000	Gancaonin G	Serine/threonine-protein kinase Chk1	CHEK1
Glycyrrhizae	MOL005000	Gancaonin G	Thrombin	Thrombin
Glycyrrhizae	MOL005000	Gancaonin G	Trypsin-1	PRSS1
Glycyrrhizae	MOL005001	Gancaonin H	Androgen receptor	AR
Glycyrrhizae	MOL005001	Gancaonin H	Calmodulin	CaM
Glycyrrhizae	MOL005001	Gancaonin H	Coagulation factor Xa	F10
Glycyrrhizae	MOL005001	Gancaonin H	Cyclin-A2	CCNA2
Glycyrrhizae	MOL005001	Gancaonin H	DNA topoisomerase II	TOP2
Glycyrrhizae	MOL005001	Gancaonin H	Estrogen receptor	ESR1
Glycyrrhizae	MOL005001	Gancaonin H	Heat shock protein HSP 90	HSP90
Glycyrrhizae	MOL005001	Gancaonin H	Nuclear receptor coactivator 2	NCOA2
Glycyrrhizae	MOL005001	Gancaonin H	Prostaglandin G/H synthase 2	PTGS2
Glycyrrhizae	MOL005001	Gancaonin H	Proto-oncogene serine/threonine-protein kinase Pim-1	PIM1
Glycyrrhizae	MOL005001	Gancaonin H	Trypsin-1	PRSS1
Glycyrrhizae	MOL005001	Gancaonin H	Vascular endothelial growth factor receptor 2	KDR
Glycyrrhizae	MOL005003	Licoagrocarpin	Acetylcholinesterase	ACHE
Glycyrrhizae	MOL005003	Licoagrocarpin	Alpha-1B adrenergic receptor	ADRA1B
Glycyrrhizae	MOL005003	Licoagrocarpin	Androgen receptor	AR
Glycyrrhizae	MOL005003	Licoagrocarpin	Beta-2 adrenergic receptor	ADRB2
Glycyrrhizae	MOL005003	Licoagrocarpin	Calmodulin	CaM
Glycyrrhizae	MOL005003	Licoagrocarpin	Cell division protein kinase 2	CDK2
Glycyrrhizae	MOL005003	Licoagrocarpin	Coagulation factor Xa	F10
Glycyrrhizae	MOL005003	Licoagrocarpin	Cyclin-A2	CCNA2
Glycyrrhizae	MOL005003	Licoagrocarpin	Estrogen receptor	ESR1
Glycyrrhizae	MOL005003	Licoagrocarpin	Estrogen receptor beta	ESR2
Glycyrrhizae	MOL005003	Licoagrocarpin	Glycogen synthase kinase-3 beta	GSK3B
Glycyrrhizae	MOL005003	Licoagrocarpin	Heat shock protein HSP 90	HSP90
Glycyrrhizae	MOL005003	Licoagrocarpin	Mitogen-activated protein kinase 14	MAPK14
Glycyrrhizae	MOL005003	Licoagrocarpin	Muscarinic acetylcholine receptor M1	CHRM1
Glycyrrhizae	MOL005003	Licoagrocarpin	Muscarinic acetylcholine receptor M3	CHRM3
Glycyrrhizae	MOL005003	Licoagrocarpin	Muscarinic acetylcholine receptor M5	CHRM5
Glycyrrhizae	MOL005003	Licoagrocarpin	Nitric oxide synthase, inducible	NOS2
Glycyrrhizae	MOL005003	Licoagrocarpin	Nitric-oxide synthase, endothelial	NOS3
Glycyrrhizae	MOL005003	Licoagrocarpin	Nuclear receptor coactivator 2	NCOA2
Glycyrrhizae	MOL005003	Licoagrocarpin	Peroxisome proliferator activated receptor gamma	PPARG
Glycyrrhizae	MOL005003	Licoagrocarpin	Potassium voltage-gated channel subfamily H member 2	KCNH2
Glycyrrhizae	MOL005003	Licoagrocarpin	Prostaglandin G/H synthase 1	PTGS1
Glycyrrhizae	MOL005003	Licoagrocarpin	Prostaglandin G/H synthase 2	PTGS2
Glycyrrhizae	MOL005003	Licoagrocarpin	Proto-oncogene serine/threonine-protein kinase Pim-1	PIM1
Glycyrrhizae	MOL005003	Licoagrocarpin	Retinoic acid receptor RXR-alpha	RXRA
Glycyrrhizae	MOL005003	Licoagrocarpin	Retinoic acid receptor RXR-beta	RXRB
Glycyrrhizae	MOL005003	Licoagrocarpin	Sodium channel protein type 5 subunit alpha	SCN5A
Glycyrrhizae	MOL005003	Licoagrocarpin	Thrombin	Thrombin
Glycyrrhizae	MOL005003	Licoagrocarpin	Trypsin-1	PRSS1
Glycyrrhizae	MOL005007	Glyasperins M	Acetylcholinesterase	ACHE
Glycyrrhizae	MOL005007	Glyasperins M	Androgen receptor	AR
Glycyrrhizae	MOL005007	Glyasperins M	Calcium-activated potassium channel subunit alpha 1	KCNMA1
Glycyrrhizae	MOL005007	Glyasperins M	Calmodulin	CaM
Glycyrrhizae	MOL005007	Glyasperins M	Cell division protein kinase 2	CDK2
Glycyrrhizae	MOL005007	Glyasperins M	Coagulation factor VII	F7
Glycyrrhizae	MOL005007	Glyasperins M	Coagulation factor Xa	F10
Glycyrrhizae	MOL005007	Glyasperins M	Cyclin-A2	CCNA2
Glycyrrhizae	MOL005007	Glyasperins M	DNA topoisomerase II	TOP2
Glycyrrhizae	MOL005007	Glyasperins M	Estrogen receptor	ESR1
Glycyrrhizae	MOL005007	Glyasperins M	Estrogen receptor beta	ESR2
Glycyrrhizae	MOL005007	Glyasperins M	Glycogen synthase kinase-3 beta	GSK3B
Glycyrrhizae	MOL005007	Glyasperins M	Heat shock protein HSP 90	HSP90
Glycyrrhizae	MOL005007	Glyasperins M	mRNA of PKA Catalytic Subunit C-alpha	PKACA
Glycyrrhizae	MOL005007	Glyasperins M	Nitric oxide synthase, inducible	NOS2
Glycyrrhizae	MOL005007	Glyasperins M	Nuclear receptor coactivator 1	NCOA1
Glycyrrhizae	MOL005007	Glyasperins M	Nuclear receptor coactivator 2	NCOA2
Glycyrrhizae	MOL005007	Glyasperins M	Peroxisome proliferator activated receptor delta	PPARD
Glycyrrhizae	MOL005007	Glyasperins M	Peroxisome proliferator activated receptor gamma	PPARG
Glycyrrhizae	MOL005007	Glyasperins M	Potassium voltage-gated channel subfamily H member 2	KCNH2
Glycyrrhizae	MOL005007	Glyasperins M	Prostaglandin G/H synthase 1	PTGS1
Glycyrrhizae	MOL005007	Glyasperins M	Prostaglandin G/H synthase 2	PTGS2
Glycyrrhizae	MOL005007	Glyasperins M	Proto-oncogene serine/threonine-protein kinase Pim-1	PIM1
Glycyrrhizae	MOL005007	Glyasperins M	Sodium channel protein type 5 subunit alpha	SCN5A
Glycyrrhizae	MOL005007	Glyasperins M	Trypsin-1	PRSS1
Glycyrrhizae	MOL005007	Glyasperins M	Vascular endothelial growth factor receptor 2	KDR
Glycyrrhizae	MOL005008	Glycyrrhiza flavonol A	Acetylcholinesterase	ACHE
Glycyrrhizae	MOL005008	Glycyrrhiza flavonol A	Androgen receptor	AR
Glycyrrhizae	MOL005008	Glycyrrhiza flavonol A	Calmodulin	CaM
Glycyrrhizae	MOL005008	Glycyrrhiza flavonol A	Cell division protein kinase 2	CDK2
Glycyrrhizae	MOL005008	Glycyrrhiza flavonol A	Coagulation factor VII	F7
Glycyrrhizae	MOL005008	Glycyrrhiza flavonol A	Coagulation factor Xa	F10
Glycyrrhizae	MOL005008	Glycyrrhiza flavonol A	Cyclin-A2	CCNA2
Glycyrrhizae	MOL005008	Glycyrrhiza flavonol A	Dipeptidyl peptidase IV	DPP4
Glycyrrhizae	MOL005008	Glycyrrhiza flavonol A	DNA topoisomerase II	TOP2
Glycyrrhizae	MOL005008	Glycyrrhiza flavonol A	Estrogen receptor	ESR1
Glycyrrhizae	MOL005008	Glycyrrhiza flavonol A	Estrogen receptor beta	ESR2
Glycyrrhizae	MOL005008	Glycyrrhiza flavonol A	Glycogen synthase kinase-3 beta	GSK3B
Glycyrrhizae	MOL005008	Glycyrrhiza flavonol A	Heat shock protein HSP 90	HSP90
Glycyrrhizae	MOL005008	Glycyrrhiza flavonol A	Nitric oxide synthase, inducible	NOS2
Glycyrrhizae	MOL005008	Glycyrrhiza flavonol A	Prostaglandin G/H synthase 2	PTGS2
Glycyrrhizae	MOL005012	Licoagroisoflavone	Nitric oxide synthase, inducible	NOS2
Glycyrrhizae	MOL005012	Licoagroisoflavone	Thrombin	Thrombin
Glycyrrhizae	MOL005012	Licoagroisoflavone	Estrogen receptor	ESR1
Glycyrrhizae	MOL005012	Licoagroisoflavone	Androgen receptor	AR
Glycyrrhizae	MOL005012	Licoagroisoflavone	Sodium channel protein type 5 subunit alpha	SCN5A
Glycyrrhizae	MOL005012	Licoagroisoflavone	Peroxisome proliferator activated receptor gamma	PPARG
Glycyrrhizae	MOL005012	Licoagroisoflavone	Coagulation factor Xa	F10
Glycyrrhizae	MOL005012	Licoagroisoflavone	Prostaglandin G/H synthase 2	PTGS2
Glycyrrhizae	MOL005012	Licoagroisoflavone	Estrogen receptor beta	ESR2
Glycyrrhizae	MOL005012	Licoagroisoflavone	Dipeptidyl peptidase IV	DPP4
Glycyrrhizae	MOL005012	Licoagroisoflavone	Mitogen-activated protein kinase 14	MAPK14
Glycyrrhizae	MOL005012	Licoagroisoflavone	Glycogen synthase kinase-3 beta	GSK3B
Glycyrrhizae	MOL005012	Licoagroisoflavone	Cell division protein kinase 2	CDK2
Glycyrrhizae	MOL005012	Licoagroisoflavone	Serine/threonine-protein kinase Chk1	CHEK1
Glycyrrhizae	MOL005012	Licoagroisoflavone	Trypsin-1	PRSS1
Glycyrrhizae	MOL005012	Licoagroisoflavone	Proto-oncogene serine/threonine-protein kinase Pim-1	PIM1
Glycyrrhizae	MOL005012	Licoagroisoflavone	Cyclin-A2	CCNA2
Glycyrrhizae	MOL005012	Licoagroisoflavone	Calmodulin	CaM
Glycyrrhizae	MOL005016	Odoratin	Nitric oxide synthase, inducible	NOS2
Glycyrrhizae	MOL005016	Odoratin	Prostaglandin G/H synthase 1	PTGS1
Glycyrrhizae	MOL005016	Odoratin	Estrogen receptor	ESR1
Glycyrrhizae	MOL005016	Odoratin	Androgen receptor	AR
Glycyrrhizae	MOL005016	Odoratin	Sodium channel protein type 5 subunit alpha	SCN5A
Glycyrrhizae	MOL005016	Odoratin	Peroxisome proliferator activated receptor gamma	PPARG
Glycyrrhizae	MOL005016	Odoratin	Prostaglandin G/H synthase 2	PTGS2
Glycyrrhizae	MOL005016	Odoratin	Retinoic acid receptor RXR-alpha	RXRA
Glycyrrhizae	MOL005016	Odoratin	Estrogen receptor beta	ESR2
Glycyrrhizae	MOL005016	Odoratin	Dipeptidyl peptidase IV	DPP4
Glycyrrhizae	MOL005016	Odoratin	Mitogen-activated protein kinase 14	MAPK14
Glycyrrhizae	MOL005016	Odoratin	Glycogen synthase kinase-3 beta	GSK3B
Glycyrrhizae	MOL005016	Odoratin	Heat shock protein HSP 90	HSP90
Glycyrrhizae	MOL005016	Odoratin	Cell division protein kinase 2	CDK2
Glycyrrhizae	MOL005016	Odoratin	Serine/threonine-protein kinase Chk1	CHEK1
Glycyrrhizae	MOL005016	Odoratin	Trypsin-1	PRSS1
Glycyrrhizae	MOL005016	Odoratin	Proto-oncogene serine/threonine-protein kinase Pim-1	PIM1
Glycyrrhizae	MOL005016	Odoratin	Cyclin-A2	CCNA2
Glycyrrhizae	MOL005016	Odoratin	Nuclear receptor coactivator 2	NCOA2
Glycyrrhizae	MOL005016	Odoratin	Calmodulin	CaM
Glycyrrhizae	MOL005017	Phaseol	Thrombin	Thrombin
Glycyrrhizae	MOL005017	Phaseol	Estrogen receptor	ESR1
Glycyrrhizae	MOL005017	Phaseol	Androgen receptor	AR
Glycyrrhizae	MOL005017	Phaseol	Peroxisome proliferator activated receptor gamma	PPARG
Glycyrrhizae	MOL005017	Phaseol	Prostaglandin G/H synthase 2	PTGS2
Glycyrrhizae	MOL005017	Phaseol	Vascular endothelial growth factor receptor 2	KDR
Glycyrrhizae	MOL005017	Phaseol	Mitogen-activated protein kinase 14	MAPK14
Glycyrrhizae	MOL005017	Phaseol	Glycogen synthase kinase-3 beta	GSK3B
Glycyrrhizae	MOL005017	Phaseol	Heat shock protein HSP 90	HSP90
Glycyrrhizae	MOL005017	Phaseol	Cell division protein kinase 2	CDK2
Glycyrrhizae	MOL005017	Phaseol	Serine/threonine-protein kinase Chk1	CHEK1
Glycyrrhizae	MOL005017	Phaseol	mRNA of PKA Catalytic Subunit C-alpha	PKACA
Glycyrrhizae	MOL005017	Phaseol	Proto-oncogene serine/threonine-protein kinase Pim-1	PIM1
Glycyrrhizae	MOL005017	Phaseol	Cyclin-A2	CCNA2
Glycyrrhizae	MOL005018	Xambioona	Nitric oxide synthase, inducible	NOS2
Glycyrrhizae	MOL005018	Xambioona	Estrogen receptor	ESR1
Glycyrrhizae	MOL005018	Xambioona	Coagulation factor Xa	F10
Glycyrrhizae	MOL005018	Xambioona	Prostaglandin G/H synthase 2	PTGS2
Glycyrrhizae	MOL005018	Xambioona	Estrogen receptor beta	ESR2
Glycyrrhizae	MOL005018	Xambioona	Proto-oncogene serine/threonine-protein kinase Pim-1	PIM1
Glycyrrhizae	MOL005018	Xambioona	Nuclear receptor coactivator 2	NCOA2
Glycyrrhizae	MOL005018	Xambioona	Calmodulin	CaM
Glycyrrhizae	MOL005020	dehydroglyasperins C	Nitric oxide synthase, inducible	NOS2
Glycyrrhizae	MOL005020	dehydroglyasperins C	Estrogen receptor	ESR1
Glycyrrhizae	MOL005020	dehydroglyasperins C	Androgen receptor	AR
Glycyrrhizae	MOL005020	dehydroglyasperins C	Sodium channel protein type 5 subunit alpha	SCN5A
Glycyrrhizae	MOL005020	dehydroglyasperins C	Peroxisome proliferator activated receptor gamma	PPARG
Glycyrrhizae	MOL005020	dehydroglyasperins C	Coagulation factor Xa	F10
Glycyrrhizae	MOL005020	dehydroglyasperins C	Prostaglandin G/H synthase 2	PTGS2
Glycyrrhizae	MOL005020	dehydroglyasperins C	Beta-2 adrenergic receptor	ADRB2
Glycyrrhizae	MOL005020	dehydroglyasperins C	Estrogen receptor beta	ESR2
Glycyrrhizae	MOL005020	dehydroglyasperins C	Mitogen-activated protein kinase 14	MAPK14
Glycyrrhizae	MOL005020	dehydroglyasperins C	Heat shock protein HSP 90	HSP90
Glycyrrhizae	MOL005020	dehydroglyasperins C	Cell division protein kinase 2	CDK2
Glycyrrhizae	MOL005020	dehydroglyasperins C	Serine/threonine-protein kinase Chk1	CHEK1
Glycyrrhizae	MOL005020	dehydroglyasperins C	Trypsin-1	PRSS1
Glycyrrhizae	MOL005020	dehydroglyasperins C	Proto-oncogene serine/threonine-protein kinase Pim-1	PIM1
Glycyrrhizae	MOL005020	dehydroglyasperins C	Cyclin-A2	CCNA2
Glycyrrhizae	MOL005020	dehydroglyasperins C	Nuclear receptor coactivator 2	NCOA2
Glycyrrhizae	MOL005020	dehydroglyasperins C	Calmodulin	CaM
Glycyrrhizae	MOL000098	quercetin	Prostaglandin G/H synthase 1	PTGS1
Glycyrrhizae	MOL000098	quercetin	Androgen receptor	AR
Glycyrrhizae	MOL000098	quercetin	Peroxisome proliferator activated receptor gamma	PPARG
Glycyrrhizae	MOL000098	quercetin	Prostaglandin G/H synthase 2	PTGS2
Glycyrrhizae	MOL000098	quercetin	Heat shock protein HSP 90	HSP90
Glycyrrhizae	MOL000098	quercetin	Phosphatidylinositol-4,5-bisphosphate 3-kinase catalytic subunit, gamma isoform	PIK3CG
Glycyrrhizae	MOL000098	quercetin	Nuclear receptor coactivator 2	NCOA2
Glycyrrhizae	MOL000098	quercetin	Dipeptidyl peptidase IV	DPP4
Glycyrrhizae	MOL000098	quercetin	Aldose reductase	AKR1B1
Glycyrrhizae	MOL000098	quercetin	Trypsin-1	PRSS1
Glycyrrhizae	MOL000098	quercetin	DNA topoisomerase II	TOP2
Glycyrrhizae	MOL000098	quercetin	Thrombin	Thrombin
Glycyrrhizae	MOL000098	quercetin	Potassium voltage-gated channel subfamily H member 2	KCNH2
Glycyrrhizae	MOL000098	quercetin	Sodium channel protein type 5 subunit alpha	SCN5A
Glycyrrhizae	MOL000098	quercetin	Coagulation factor Xa	F10
Glycyrrhizae	MOL000098	quercetin	Beta-2 adrenergic receptor	ADRB2
Glycyrrhizae	MOL000098	quercetin	Stromelysin-1	MMP3
Glycyrrhizae	MOL000098	quercetin	mRNA of PKA Catalytic Subunit C-alpha	PKACA
Glycyrrhizae	MOL000098	quercetin	Coagulation factor VII	F7
Glycyrrhizae	MOL000098	quercetin	Nitric-oxide synthase, endothelial	NOS3
Glycyrrhizae	MOL000098	quercetin	Retinoic acid receptor RXR-alpha	RXRA
Glycyrrhizae	MOL000098	quercetin	Acetylcholinesterase	ACHE
Glycyrrhizae	MOL000098	quercetin	Gamma-aminobutyric acid receptor subunit alpha-1	GABRA1
Glycyrrhizae	MOL000098	quercetin	Amine oxidase [flavin-containing] B	MAOB
Glycyrrhizae	MOL000098	quercetin	Transcription factor p65	RELA
Glycyrrhizae	MOL000098	quercetin	Epidermal growth factor receptor	EGFR
Glycyrrhizae	MOL000098	quercetin	RAC-alpha serine/threonine-protein kinase	AKT1
Glycyrrhizae	MOL000098	quercetin	Vascular endothelial growth factor A	VEGFA
Glycyrrhizae	MOL000098	quercetin	G1/S-specific cyclin-D1	CCND1
Glycyrrhizae	MOL000098	quercetin	Apoptosis regulator Bcl-2	BCL2
Glycyrrhizae	MOL000098	quercetin	Bcl-2-like protein 1	BCL2L1
Glycyrrhizae	MOL000098	quercetin	Proto-oncogene c-Fos	FOS
Glycyrrhizae	MOL000098	quercetin	Cyclin-dependent kinase inhibitor 1	CDKN1A
Glycyrrhizae	MOL000098	quercetin	Eukaryotic translation initiation factor 6	EIF6
Glycyrrhizae	MOL000098	quercetin	Apoptosis regulator BAX	BAX
Glycyrrhizae	MOL000098	quercetin	Caspase-9	CASP9
Glycyrrhizae	MOL000098	quercetin	Urokinase-type plasminogen activator	PLAU
Glycyrrhizae	MOL000098	quercetin	72 kDa type IV collagenase	MMP2
Glycyrrhizae	MOL000098	quercetin	Matrix metalloproteinase-9	MMP9
Glycyrrhizae	MOL000098	quercetin	Mitogen-activated protein kinase 1	MAPK1
Glycyrrhizae	MOL000098	quercetin	Interleukin-10	IL10
Glycyrrhizae	MOL000098	quercetin	Pro-epidermal growth factor	EGF
Glycyrrhizae	MOL000098	quercetin	Retinoblastoma-associated protein	RB1
Glycyrrhizae	MOL000098	quercetin	Tumor necrosis factor	TNF
Glycyrrhizae	MOL000098	quercetin	Transcription factor AP-1	JUN
Glycyrrhizae	MOL000098	quercetin	Interleukin-6	IL6
Glycyrrhizae	MOL000098	quercetin	Cyclin-dependent kinase inhibitor 2A, isoforms 1/2/3	CDKN2A
Glycyrrhizae	MOL000098	quercetin	Activator of 90 kDa heat shock protein ATPase homolog 1	AHSA1
Glycyrrhizae	MOL000098	quercetin	Caspase-3	CASP3
Glycyrrhizae	MOL000098	quercetin	Cellular tumor antigen p53	TP53
Glycyrrhizae	MOL000098	quercetin	ETS domain-containing protein Elk-1	ELK1
Glycyrrhizae	MOL000098	quercetin	NF-kappa-B inhibitor alpha	NFKBIA
Glycyrrhizae	MOL000098	quercetin	NADPH--cytochrome P450 reductase	POR
Glycyrrhizae	MOL000098	quercetin	Ornithine decarboxylase	ODC1
Glycyrrhizae	MOL000098	quercetin	Xanthine dehydrogenase/oxidase	XDH
Glycyrrhizae	MOL000098	quercetin	Caspase-8	CASP8
Glycyrrhizae	MOL000098	quercetin	DNA topoisomerase 1	TOP1
Glycyrrhizae	MOL000098	quercetin	RAF proto-oncogene serine/threonine-protein kinase	RAF1
Glycyrrhizae	MOL000098	quercetin	Superoxide dismutase [Cu-Zn]	SOD1
Glycyrrhizae	MOL000098	quercetin	Protein kinase C alpha type	PRKCA
Glycyrrhizae	MOL000098	quercetin	Interstitial collagenase	MMP1
Glycyrrhizae	MOL000098	quercetin	Hypoxia-inducible factor 1-alpha	HIF1A
Glycyrrhizae	MOL000098	quercetin	Signal transducer and activator of transcription 1-alpha/beta	STAT1
Glycyrrhizae	MOL000098	quercetin	Protein CBFA2T1	RUNX1T1
Glycyrrhizae	MOL000098	quercetin	Probable E3 ubiquitin-protein ligase HERC5	HERC5
Glycyrrhizae	MOL000098	quercetin	Cell division control protein 2 homolog	CDK1
Glycyrrhizae	MOL000098	quercetin	78 kDa glucose-regulated protein	GRP78
Glycyrrhizae	MOL000098	quercetin	Receptor tyrosine-protein kinase erbB-2	ERBB2
Glycyrrhizae	MOL000098	quercetin	Peroxisome proliferator-activated receptor gamma	PPARG
Glycyrrhizae	MOL000098	quercetin	Acetyl-CoA carboxylase 1	ACACA
Glycyrrhizae	MOL000098	quercetin	Heme oxygenase 1	HMOX1
Glycyrrhizae	MOL000098	quercetin	Cytochrome P450 3A4	CYP3A4
Glycyrrhizae	MOL000098	quercetin	Cytochrome P450 1A2	CYP1A2
Glycyrrhizae	MOL000098	quercetin	Caveolin-1	CAV1
Glycyrrhizae	MOL000098	quercetin	Myc proto-oncogene protein	MYC
Glycyrrhizae	MOL000098	quercetin	Tissue factor	F3
Glycyrrhizae	MOL000098	quercetin	Gap junction alpha-1 protein	GJA1
Glycyrrhizae	MOL000098	quercetin	Cytochrome P450 1A1	CYP1A1
Glycyrrhizae	MOL000098	quercetin	Intercellular adhesion molecule 1	ICAM1
Glycyrrhizae	MOL000098	quercetin	Interleukin-1 beta	IL1B
Glycyrrhizae	MOL000098	quercetin	C-C motif chemokine 2	CCL2
Glycyrrhizae	MOL000098	quercetin	E-selectin	SELE
Glycyrrhizae	MOL000098	quercetin	Vascular cell adhesion protein 1	VCAM1
Glycyrrhizae	MOL000098	quercetin	Prostaglandin E2 receptor EP3 subtype	PTGER3
Glycyrrhizae	MOL000098	quercetin	Interleukin-8	CXCL8
Glycyrrhizae	MOL000098	quercetin	Protein kinase C beta type	PRKCB
Glycyrrhizae	MOL000098	quercetin	Baculoviral IAP repeat-containing protein 5	BIRC5
Glycyrrhizae	MOL000098	quercetin	Dual oxidase 2	DUOX2
Glycyrrhizae	MOL000098	quercetin	Nitric oxide synthase, endothelial	NOS3
Glycyrrhizae	MOL000098	quercetin	Heat shock protein beta-1	HSPB1
Glycyrrhizae	MOL000098	quercetin	Transforming growth factor beta-1	TGFB1
Glycyrrhizae	MOL000098	quercetin	Estrogen sulfotransferase	SULT1E1
Glycyrrhizae	MOL000098	quercetin	Maltase-glucoamylase, intestinal	MGAM
Glycyrrhizae	MOL000098	quercetin	Interleukin-2	IL2
Glycyrrhizae	MOL000098	quercetin	Nuclear receptor subfamily 1 group I member 2	NR1I2
Glycyrrhizae	MOL000098	quercetin	Cytochrome P450 1B1	CYP1B1
Glycyrrhizae	MOL000098	quercetin	G2/mitotic-specific cyclin-B1	CCNB1
Glycyrrhizae	MOL000098	quercetin	Tissue-type plasminogen activator	PLAT
Glycyrrhizae	MOL000098	quercetin	Thrombomodulin	THBD
Glycyrrhizae	MOL000098	quercetin	Plasminogen activator inhibitor 1	SERPINE1
Glycyrrhizae	MOL000098	quercetin	Collagen alpha-1(I) chain	COL1A1
Glycyrrhizae	MOL000098	quercetin	Interferon gamma	IFNG
Glycyrrhizae	MOL000098	quercetin	Arachidonate 5-lipoxygenase	ALOX5
Glycyrrhizae	MOL000098	quercetin	Phosphatidylinositol-3,4,5-trisphosphate 3-phosphatase and dual-specificity protein phosphatase PTEN	PTEN
Glycyrrhizae	MOL000098	quercetin	Interleukin-1 alpha	IL1A
Glycyrrhizae	MOL000098	quercetin	Myeloperoxidase	MPO
Glycyrrhizae	MOL000098	quercetin	DNA topoisomerase 2-alpha	TOP2A
Glycyrrhizae	MOL000098	quercetin	Neutrophil cytosol factor 1	NCF1
Glycyrrhizae	MOL000098	quercetin	ATP-binding cassette sub-family G member 2	ABCG2
Glycyrrhizae	MOL000098	quercetin	Hyaluronan synthase 2	HAS2
Glycyrrhizae	MOL000098	quercetin	Glutathione S-transferase P	GSTP1
Glycyrrhizae	MOL000098	quercetin	Nuclear factor erythroid 2-related factor 2	NFE2L2
Glycyrrhizae	MOL000098	quercetin	NAD(P)H dehydrogenase [quinone] 1	NQO1
Glycyrrhizae	MOL000098	quercetin	Poly [ADP-ribose] polymerase 1	PARP1
[truncated: 40 more rows]
