# Supplementary material for: Elucidating the anti-aging mechanism of Si Jun Zi Tang by integrating network pharmacology and experimental validation in vivo
Source: Aging (Albany NY). 2022 May 10;14(9):3941–55. doi: 10.18632/aging.204055 (PMC9134961; doi:10.18632/aging.204055)
Supplement: Supplementary Table 3 [file aging-14-204055-s003.xlsx]

## Sheet: GO-TOP12
Supplementary Table 3. GO entries.
Term	Term	Category	Number of Protein	%	PValue	Genes	List Total	FDR
GO:0042493	response to drug	Biological process	43	18.5345	4.52551e-30	CDKN1A, MAOB, PTEN, ABAT, HTR2A, PTGS2, SLC6A2, ADRA1A, SLC6A3, RELA, SLC6A4, ICAM1, CCNB1, CCND1, MYC, CASP3, DRD1, IL10, SREBF1, ABCC1, JUN, TGFB1, UGT1A1, CHUK, STAT1, BAD, STAT3, FOS, SOD1, IL4, COL1A1, POR, IL6, IFNG, CDK4, CAT, CYP1A1, PDE3A, BCL2, CDK1, PPARG, TOP1, ABCG2	232	1.10423e-26
GO:0045471	response to ethanol	Biological process	23	9.91379	3.45695e-20	NQO1, VCAM1, MAOB, BAD, GSTP1, STAT3, ADIPOQ, PTEN, ABAT, HTR3A, HMGCR, SLC2A4, SLC6A3, IL2, ICAM1, SOD1, IL4, CASP8, CCND1, MYC, CAT, CDK1, CCL2	232	4.21748e-17
GO:0045944	positive regulation transcription from RNA promoter	Biological process	56	24.1379	1.0208e-19	RB1, TOP2A, GSK3B, SERPINE1, AHR, ELK1, TNF, IKBKB, PPP3CA, MYC, AKT1, NKX3-1, IL10, NCOA1, NCOA2, SREBF1, PARP1, CHUK, FOS, SIRT1, IL1A, AR, IFNG, IRF1, IL1B, PPARG, PGR, RAF1, PPARA, TP53, NR1I3, NR1I2, ADRB2, HIF1A, EGFR, RELA, RXRB, RXRA, HSF1, E2F1, MAPK3, JUN, TGFB1, CDKN2A, STAT1, STAT3, MAPK14, ESR1, IL2, FOSL2, VEGFA, NFKBIA, IL4, CXCL10, IL6, NFE2L2	232	8.30248e-17
GO:0001666	response to hypoxia	Biological process	25	10.7759	1.32114e-17	CHRNA7, PLAT, ABAT, HIF1A, SLC6A4, DPP4, PLAU, CASP3, CCL2, HMOX1, TGFB1, VCAM1, NOS2, PRKCB, BAD, MMP2, CAV1, ADIPOQ, VEGFA, F7, KCNMA1, CAT, CYP1A1, RAF1, PPARA	232	7.20302e-15
GO:0045893	positive regulation of transcription, DNA-templated	Biological process	39	16.8103	1.47603e-17	RB1, NR1I2, AHR, ELK1, HIF1A, TNF, RELA, IKBKB, CHEK2, MYC, E2F1, MAPK1, NKX3-1, MAPK3, IL10, NCOA1, JUN, TGFB1, CDKN2A, EGF, STAT1, INSR, STAT3, FOS, ESR1, RUNX2, ESR2, IL4, CCNA2, COL1A1, AR, IL6, IRF1, IL1B, CDK2, PPARG, PPARA, TP53, PPARD	232	7.20302e-15
GO:0071456	cellular response to hypoxia	Biological process	20	8.62069	4.25301e-17	OPRD1, BAD, PTEN, SLC2A4, PTGS2, HIF1A, SIRT1, ICAM1, VEGFA, CCNA2, NPEPPS, CCNB1, E2F1, BCL2, AKT1, HMOX1, TP53, NFE2L2, NKX3-1, PPARD	232	1.72956e-14
GO:0007568	aging	Biological process	24	10.3448	6.58518e-17	IL10, SREBF1, NQO1, JUN, TGFB1, VCAM1, STAT3, PTEN, ABAT, FOS, HMGCR, HTR2A, MPO, ADRA1A, SLC6A3, RELA, SOD1, CASP9, IL6, CAT, CYP1A1, CCL2, AKT1, NFE2L2	232	2.29541e-14
GO:0032355	positive regulation of gene expression	Biological process	28	12.069	2.87379e-16	CRP, NR1I2, HIF1A, TNF, SLC6A4, GJA1, MAPK8, ERBB3, MYC, ERBB2, E2F1, APOB, LDLR, NKX3-1, TGFB1, CAV1, STAT3, MAPK14, VEGFA, IL1A, AR, IL6, IFNG, IL1B, CDK1, TP53, PPARD, NFE2L2	232	8.00498e-14
GO:0010628	response to estradiol	Biological process	19	8.18966	2.95265e-16	NCOA1, NQO1, TGFB1, BAD, GSTP1, STAT3, PTEN, PTGS2, ESR1, SLC6A4, CASP9, COL1A1, F7, CASP8, CCND1, MYC, CASP3, CYP1A2, CAT	232	8.00498e-14
GO:0043066	negative regulation of apoptotic process	Biological process	35	15.0862	7.09948e-16	GSK3B, CDKN1A, GSTP1, PTEN, HSPB1, MPO, RELA, EGFR, IKBKB, MAPK8, MYC, CASP3, KDR, PIM1, AKT1, IL10, NQO1, STAT3, MMP9, SIRT1, IL2, VEGFA, IL4, NFKBIA, IL6, CD40LG, CAT, PDE3A, BCL2, CDK1, BIRC5, RAF1, TP53, BCL2L1, PPARD	232	1.73227e-13
GO:0008284	positive regulation of cell proliferation	Biological process	34	14.6552	9.23e-15	CHRM1, CHRNA7, ODC1, PTEN, ADRA1D, HTR2A, RELA, EGFR, DPP4, MYC, KDR, MAPK1, HAS2, NKX3-1, TGFB1, EGF, INSR, STAT3, AKR1C3, IGF2, SIRT1, ADRA2A, RUNX2, IL2, VEGFA, CXCL10, AR, IL6, IFNG, CDK4, CDK2, BCL2, BIRC5, BCL2L1	232	2.04738e-12
GO:0032496	response to toxic substance	Biological process	17	7.32759	3.31804e-14	NQO1, CDKN1A, MAOB, CHUK, GSTP1, PON1, AHR, FOS, SLC6A4, CDK4, BCL2, CDK1, BAX, CYP1B1, MAPK1, CES1, MAPK3	232	6.74667e-12
GO:0005615	extracellular space	Cellular component	56	24.1379	4.28359e-15	ACHE, CXCL8, SERPINE1, AKR1B1, HSPB1, PLAT, MPO, TNF, CXCL2, ICAM1, THBD, PLAU, CA2, CHEK1, CTSD, IL10, IGFBP3, MMP2, ADIPOQ, MMP3, CTRB1, PCOLCE, MMP9, F3, IL1A, F7, IFNG, SLPI, IL1B, CAT, CES1, CRP, GSTP1, PON1, EGFR, ERBB3, ALOX5, SPP1, CCL2, HMOX1, APOB, XDH, TGFB1, VCAM1, EGF, IGF2, SELE, IL2, SOD1, VEGFA, IL4, COL1A1, CXCL10, CXCL11, IL6, CD40LG	232	1.15228e-12
GO:0005829	cytosol	Cellular component	91	39.2241	7.75082e-14	GSK3B, CDKN1A, NCF1, PTEN, AKR1B1, HSPB1, PYGM, HTR2A, SLC2A4, HK2, PIK3CG, SLC6A4, CASP9, IKBKB, HERC5, PPP3CA, NPEPPS, GJA1, CASP8, CCND1, CA2, MYC, CASP3, PSMD3, CHEK1, AKT1, SREBF1, CHUK, PRKCB, AHSA1, PRKCA, FOS, IL1A, AR, RASA1, IRF1, IL1B, CAT, BIRC5, PPARG, RAF1, TP53, CES1, ADH1C, ADH1B, GSTP1, NR1I3, ODC1, HIF1A, ACACA, RELA, MAPK8, CCNB1, SULT1E1, ALOX5, HSF1, HMOX1, MAPK1, LTA4H, APOB…	232	1.04248e-11
GO:0045121	membrane raft	Cellular component	20	8.62069	1.70496e-11	OPRD1, CAV1, SLC2A4, OPRM1, SELE, SLC6A2, TNF, SLC6A3, EGFR, SLC6A4, ICAM1, BACE1, DPP4, IKBKB, GJA1, CASP8, CASP3, KDR, OLR1, CTSD	232	1.52879e-09
GO:0005886	plasma membrane	Cellular component	95	40.9483	4.87125e-10	CHRM2, ACHE, CHRM3, GSK3B, CHRM1, CHRM4, SERPINE1, CHRM5, PTEN, HSPB1, ADRA1D, HTR2A, SLC2A4, ADRA1B, SLC6A2, ADRA1A, TNF, SLC6A3, PLB1, PIK3CG, SLC6A4, ICAM1, THBD, NPEPPS, GJA1, RASSF1, PLAU, CA2, CASP3, PIM1, KDR, AKT1, OLR1, SCN5A, KCNH2, ABCC1, PRKCB, MMP2, DIO1, HTR3A, PRKCA, OPRM1, F3, ADRA2A, BACE1, F7, AR, CLDN4, KCNMA1, CAT, RAF1, ABCG2, OPRD1, GRIA2, CHRNA2, GSTP1, CHRNA7, PTGER3, ADRB…	232	3.27592e-08
GO:0005901	caveola	Cellular component	11	4.74138	8.57518e-09	NOS3, CAV1, INSR, KCNMA1, HMOX1, MAPK1, SCN5A, HTR2A, PTGS2, SELE, MAPK3	232	4.61345e-07
GO:0005739	mitochondrion	Cellular component	43	18.5345	3.25216e-08	GSK3B, MAOB, MAOA, GSTP1, PTEN, ABAT, DCAF5, MPO, ELK1, ACACA, CASP9, PPP3CA, GJA1, MAPK8, CASP8, MYC, E2F1, CYP1B1, AKT1, MAPK1, MAPK3, RUNX1T1, PARP1, GOT1, CDKN2A, BAD, MMP2, GSR, PRKCA, MAPK14, SIRT1, ESR2, SOD1, MAPK10, POR, FASN, CAT, CYP1A1, BCL2, CDK1, BAX, TP53, BCL2L1	232	1.45805e-06
GO:0005654	nucleoplasm	Cellular component	68	29.3103	7.01847e-08	RB1, TOP2A, CDKN1A, PTEN, AKR1B1, AHR, ELK1, NR3C2, PPP3CA, CASP8, CCND1, MYC, CHEK2, CASP3, PSMD3, CHEK1, AKT1, OLR1, NCOA1, NCOA2, SREBF1, PARP1, CHUK, PRKCB, PRKCA, FOS, SIRT1, RUNX2, CCNA2, AR, IRF1, BIRC5, PPARG, PGR, TOP1, PPARA, TP53, PPARD, NR1I3, NR1I2, HIF1A, RELA, RXRB, MAPK8, CCNB1, RXRA, HSF1, E2F1, E2F2, MAPK1, LTA4H, RXRG, MAPK3, RUNX1T1, JUN, CDKN2A, STAT1, STAT3, MAPK14, ESR1, ES…	232	2.6971e-06
GO:0045211	postsynaptic membrane	Cellular component	16	6.89655	8.32132e-08	CHRM2, OPRD1, GABRA2, CHRM3, GRIA2, GABRA1, CHRM1, CHRNA2, GABRA6, GABRA5, CHRM4, CHRNA7, CHRM5, GABRA3, PTEN, HTR3A	232	2.79804e-06
GO:0043235	receptor complex	Cellular component	12	5.17241	6.5507e-07	RXRA, ERBB3, EGF, INSR, ERBB2, MTTP, OLR1, ADRB2, LDLR, EGFR, ADRA2A, NR3C2	232	1.95793e-05
GO:0005887	integral component of plasma membrane	Cellular component	41	17.6724	1.27397e-06	CHRM2, OPRD1, GRIA2, CHRM3, CHRM1, CHRM4, PTGER3, CHRM5, ADRA1D, ADRB1, ADRB2, HTR2A, SLC2A4, ADRA1B, SLC6A2, ADRA1A, TNF, SLC6A3, SLC6A4, ICAM1, THBD, GJA1, ERBB3, KDR, HAS2, OLR1, DRD1, LDLR, GABRA1, ABCC1, UGT1A1, GABRA6, GABRA5, CAV1, INSR, GABRA3, OPRM1, ADRA2A, BACE1, CLDN4, CD40LG	232	3.42699e-05
GO:0005576	nuclear chromatin	Cellular component	13	5.60345	6.77289e-06	NCOA1, STAT1, STAT3, ESR1, SIRT1, RELA, RUNX2, AR, RXRA, IRF1, E2F1, TP53, PPARD	232	0.000165628
GO:0000790	synapse	Cellular component	12	5.17241	2.03649e-05	CHRM2, GABRA2, GABRA1, ACHE, CHRM3, CHRM1, GABRA6, GABRA5, CHRM4, CHRM5, CCL2, EGFR	232	0.00042817
GO:0019899	enzyme binding	Molecular function	41	17.6724	1.98429e-26	TOP2A, PTEN, CYP3A4, PTGS2, HIF1A, EGFR, PPP3CA, MAPK8, RXRA, CCND1, AKT1, HMOX1, SCN5A, NCOA1, PTPN1, GSTM2, JUN, GSTM1, TGFB1, UGT1A1, PARP1, STAT1, CAV1, PRKCA, MAPK14, ESR1, SIRT1, ESR2, BACE1, NFKBIA, AR, POR, SLPI, CYP1A2, CAT, CYP1A1, BIRC5, PPARG, PGR, RAF1, TP53	231	1.17668e-23
GO:0005515	protein binding	Molecular function	175	75.431	1.07446e-13	RB1, CHRM3, NCF1, SERPINE1, PLAT, AHR, ELK1, TNF, ICAM1, NR3C2, HERC5, GJA1, RASSF1, CCND1, PLAU, MYC, CHEK2, PSMD3, CHEK1, PIM1, KDR, AKT1, KCNH2, PRKCB, IGFBP3, ADIPOQ, PRKCA, PCOLCE, RUNX2, AR, POR, SLPI, SOAT1, PGR, RAF1, TP53, ABCG2, GRIA2, MTTP, ADRB1, ADRB2, HIF1A, ACACA, DPP4, CCNB1, MAP2, HMOX1, CACNA1S, DRD1, LTA4H, APOB, GSTM2, JUN, TGFB1, INSR, CAV1, IGF2, SELE, ESR1, ESR2, FOSL2, NFK…	231	2.59466e-11
GO:0008134	transcription factor binding	Molecular function	26	11.2069	1.31264e-13	RB1, AHR, HIF1A, RELA, CCND1, MYC, E2F1, PIM1, E2F2, MAPK1, NKX3-1, NCOA2, JUN, PARP1, CDKN2A, STAT3, FOS, ESR1, SIRT1, NFKBIA, AR, BCL2, PPARG, PPARA, TP53, PPARD	231	2.59466e-11
GO:0004879	RNA polymerase II transcription factor activity	Molecular function	12	5.17241	1.05284e-12	RXRB, AR, RXRA, NR1I3, STAT3, NR1I2, PPARG, AHR, PPARA, ESR1, ESR2, PPARD	231	1.56083e-10
GO:0008144	drug binding	Molecular function	15	6.46552	1.66351e-12	CHRM2, TOP2A, CHRM3, GABRA1, CHRM1, CHRNA2, GSTP1, NR1I2, HTR2A, SLC6A3, PPP3CA, FASN, PPARG, PPARA, PPARD	231	1.97293e-10
GO:0042802	identical protein binding	Molecular function	39	16.8103	2.00738e-12	RB1, PTEN, HSPB1, TNF, RELA, EGFR, DPP4, CASP8, ERBB3, CHEK2, ERBB2, HSF1, AKT1, MAPK1, LDLR, KCNH2, NQO1, JUN, PARP1, GOT1, STAT1, CAV1, ADIPOQ, STAT3, MMP9, ESR1, SIRT1, SOD1, VEGFA, NFKBIA, COL1A1, CLDN4, BCL2, BAX, BIRC5, PPARG, RAF1, TP53, BCL2L1	231	1.98397e-10
GO:0042803	protein homodimerization activity	Molecular function	38	16.3793	4.20977e-12	TOP2A, ACHE, MAOB, CHRNA7, PON1, ODC1, ABAT, HMGCR, ADRB2, PTGS2, RELA, SLC6A4, DPP4, IKBKB, ERBB3, CHEK2, HMOX1, XDH, KCNH2, GSTM2, JUN, GSTM1, TGFB1, UGT1A1, NOS2, CHUK, STAT1, ADIPOQ, ADRA2A, SOD1, VEGFA, FASN, CAT, BCL2, BAX, BIRC5, ABCG2, BCL2L1	231	3.56628e-10
GO:0003707	protein heterodimerization activity	Molecular function	30	12.931	8.15665e-12	TOP2A, MTTP, ADRB1, AHR, ADRA1B, HIF1A, ADRA1A, RELA, EGFR, IKBKB, PPP3CA, RXRA, ERBB3, ERBB2, JUN, TGFB1, UGT1A1, CHUK, BAD, CAV1, FOS, ADRA2A, VEGFA, BCL2, BAX, BIRC5, RAF1, TP53, BCL2L1, PPARD	231	6.04611e-10
GO:0046982	steroid hormone receptor activity	Molecular function	13	5.60345	1.01065e-11	NR1I3, NR1I2, ESR1, ESR2, NR3C2, RXRB, AR, RXRA, PGR, PPARG, PPARA, RXRG, PPARD	231	6.65907e-10
GO:0019901	protein kinase binding	Molecular function	25	10.7759	3.64959e-10	GSK3B, PTEN, HSPB1, HIF1A, RELA, EGFR, CASP9, IKBKB, CCNB1, CCND1, CHEK2, HSF1, E2F1, SCN5A, SREBF1, PTPN1, PARP1, CDKN2A, BAD, CAV1, STAT3, ADRA2A, CCNA2, TP53, BCL2L1	231	2.16421e-08
GO:0043565	sequence-specific DNA binding	Molecular function	26	11.2069	4.46254e-08	NR1I3, NR1I2, ELK1, HIF1A, NR3C2, RXRB, RXRA, MYC, HSF1, E2F1, RXRG, NKX3-1, JUN, FOS, ESR1, ESR2, FOSL2, AR, IRF1, BCL2, PPARG, PGR, PPARA, TP53, PPARD, NFE2L2	231	2.40572e-06
GO:0005496	steroid binding	Molecular function	8	3.44828	5.60207e-08	AR, UGT1A1, SULT1E1, PGR, CYP3A4, ESR1, ESR2, NR3C2	231	2.76836e-06

## Sheet: SJZT-FDR<0.5 BP
Category	Term	Count	%	PValue	Genes	List Total	Pop Hits	Pop Total	Fold Enrichment	Bonferroni	Benjamini	FDR
Category	GO:0042493~response to drug	43	18.5345	4.52551e-30	CDKN1A, MAOB, PTEN, ABAT, HTR2A, PTGS2, SLC6A2, ADRA1A, SLC6A3, RELA, SLC6A4, ICAM1, CCNB1, CCND1, MYC, CASP3, DRD1, IL10, SREBF1, ABCC1, JUN, TGFB1, UGT1A1, CHUK, STAT1, BAD, STAT3, FOS, SOD1, IL4, COL1A1, POR, IL6, IFNG, CDK4, CAT, CYP1A1, PDE3A, BCL2, CDK1, PPARG, TOP1, ABCG2	232	304	16792	10.2379	1.24497e-26	1.24497e-26	1.10423e-26
GOTERM_BP_DIRECT	GO:0045471~response to ethanol	23	9.91379	3.45695e-20	NQO1, VCAM1, MAOB, BAD, GSTP1, STAT3, ADIPOQ, PTEN, ABAT, HTR3A, HMGCR, SLC2A4, SLC6A3, IL2, ICAM1, SOD1, IL4, CASP8, CCND1, MYC, CAT, CDK1, CCL2	232	105	16792	15.8545	9.51006e-17	4.75503e-17	4.21748e-17
GOTERM_BP_DIRECT	GO:0045944~positive regulation of transcription from RNA polymerase II promoter	56	24.1379	1.0208e-19	RB1, TOP2A, GSK3B, SERPINE1, AHR, ELK1, TNF, IKBKB, PPP3CA, MYC, AKT1, NKX3-1, IL10, NCOA1, NCOA2, SREBF1, PARP1, CHUK, FOS, SIRT1, IL1A, AR, IFNG, IRF1, IL1B, PPARG, PGR, RAF1, PPARA, TP53, NR1I3, NR1I2, ADRB2, HIF1A, EGFR, RELA, RXRB, RXRA, HSF1, E2F1, MAPK3, JUN, TGFB1, CDKN2A, STAT1, STAT3, MAPK14, ESR1, IL2, FOSL2, VEGFA, NFKBIA, IL4, CXCL10, IL6, NFE2L2	232	981	16792	4.13174	2.80821e-16	9.3607e-17	8.30248e-17
GOTERM_BP_DIRECT	GO:0001666~response to hypoxia	25	10.7759	1.32114e-17	CHRNA7, PLAT, ABAT, HIF1A, SLC6A4, DPP4, PLAU, CASP3, CCL2, HMOX1, TGFB1, VCAM1, NOS2, PRKCB, BAD, MMP2, CAV1, ADIPOQ, VEGFA, F7, KCNMA1, CAT, CYP1A1, RAF1, PPARA	232	172	16792	10.5202	3.63447e-14	8.12111e-15	7.20302e-15
GOTERM_BP_DIRECT	GO:0045893~positive regulation of transcription, DNA-templated	39	16.8103	1.47603e-17	RB1, NR1I2, AHR, ELK1, HIF1A, TNF, RELA, IKBKB, CHEK2, MYC, E2F1, MAPK1, NKX3-1, MAPK3, IL10, NCOA1, JUN, TGFB1, CDKN2A, EGF, STAT1, INSR, STAT3, FOS, ESR1, RUNX2, ESR2, IL4, CCNA2, COL1A1, AR, IL6, IRF1, IL1B, CDK2, PPARG, PPARA, TP53, PPARD	232	515	16792	5.48115	4.06055e-14	8.12111e-15	7.20302e-15
GOTERM_BP_DIRECT	GO:0071456~cellular response to hypoxia	20	8.62069	4.25301e-17	OPRD1, BAD, PTEN, SLC2A4, PTGS2, HIF1A, SIRT1, ICAM1, VEGFA, CCNA2, NPEPPS, CCNB1, E2F1, BCL2, AKT1, HMOX1, TP53, NFE2L2, NKX3-1, PPARD	232	96	16792	15.079	1.17e-13	1.95001e-14	1.72956e-14
GOTERM_BP_DIRECT	GO:0007568~aging	24	10.3448	6.58518e-17	IL10, SREBF1, NQO1, JUN, TGFB1, VCAM1, STAT3, PTEN, ABAT, FOS, HMGCR, HTR2A, MPO, ADRA1A, SLC6A3, RELA, SOD1, CASP9, IL6, CAT, CYP1A1, CCL2, AKT1, NFE2L2	232	165	16792	10.5279	3.05422e-13	2.58798e-14	2.29541e-14
GOTERM_BP_DIRECT	GO:0010628~positive regulation of gene expression	28	12.069	2.87379e-16	CRP, NR1I2, HIF1A, TNF, SLC6A4, GJA1, MAPK8, ERBB3, MYC, ERBB2, E2F1, APOB, LDLR, NKX3-1, TGFB1, CAV1, STAT3, MAPK14, VEGFA, IL1A, AR, IL6, IFNG, IL1B, CDK1, TP53, PPARD, NFE2L2	232	262	16792	7.73519	9.16267e-13	9.02528e-14	8.00498e-14
GOTERM_BP_DIRECT	GO:0032355~response to estradiol	19	8.18966	2.95265e-16	NCOA1, NQO1, TGFB1, BAD, GSTP1, STAT3, PTEN, PTGS2, ESR1, SLC6A4, CASP9, COL1A1, F7, CASP8, CCND1, MYC, CASP3, CYP1A2, CAT	232	91	16792	15.1122	9.16267e-13	9.02528e-14	8.00498e-14
GOTERM_BP_DIRECT	GO:0043066~negative regulation of apoptotic process	35	15.0862	7.09948e-16	GSK3B, CDKN1A, GSTP1, PTEN, HSPB1, MPO, RELA, EGFR, IKBKB, MAPK8, MYC, CASP3, KDR, PIM1, AKT1, IL10, NQO1, STAT3, MMP9, SIRT1, IL2, VEGFA, IL4, NFKBIA, IL6, CD40LG, CAT, PDE3A, BCL2, CDK1, BIRC5, RAF1, TP53, BCL2L1, PPARD	232	455	16792	5.56764	1.83253e-12	1.95307e-13	1.73227e-13
GOTERM_BP_DIRECT	GO:0008284~positive regulation of cell proliferation	34	14.6552	9.23e-15	CHRM1, CHRNA7, ODC1, PTEN, ADRA1D, HTR2A, RELA, EGFR, DPP4, MYC, KDR, MAPK1, HAS2, NKX3-1, TGFB1, EGF, INSR, STAT3, AKR1C3, IGF2, SIRT1, ADRA2A, RUNX2, IL2, VEGFA, CXCL10, AR, IL6, IFNG, CDK4, CDK2, BCL2, BIRC5, BCL2L1	232	466	16792	5.28089	2.53501e-11	2.30834e-12	2.04738e-12
GOTERM_BP_DIRECT	GO:0009636~response to toxic substance	17	7.32759	3.31804e-14	NQO1, CDKN1A, MAOB, CHUK, GSTP1, PON1, AHR, FOS, SLC6A4, CDK4, BCL2, CDK1, BAX, CYP1B1, MAPK1, CES1, MAPK3	232	85	16792	14.4759	9.13213e-11	7.6066e-12	6.74667e-12
GOTERM_BP_DIRECT	GO:0032496~response to lipopolysaccharide	21	9.05172	1.09229e-13	JUN, VCAM1, MAOB, UGT1A1, CHUK, FOS, OPRM1, PTGS2, SELE, MPO, CXCL2, CASP9, CXCL10, THBD, CXCL11, CASP8, SLPI, CASP3, CYP1A2, CYP1A1, APOB	232	164	16792	9.26808	3.00536e-10	2.31146e-11	2.05015e-11
GOTERM_BP_DIRECT	GO:0097192~extrinsic apoptotic signaling pathway in absence of ligand	12	5.17241	5.69863e-13	CASP9, IL4, IL1A, GSK3B, ERBB3, BAD, IL1B, CASP3, BCL2, BAX, IL2, BCL2L1	232	34	16792	25.5456	1.56773e-09	1.11978e-10	9.93189e-11
GOTERM_BP_DIRECT	GO:0045766~positive regulation of angiogenesis	17	7.32759	4.38401e-12	CXCL8, PRKCB, NOS3, CHRNA7, SERPINE1, HSPB1, PRKCA, F3, HIF1A, SIRT1, VEGFA, IL1A, IL1B, KDR, CYP1B1, HMOX1, NFE2L2	232	115	16792	10.6996	1.20605e-08	8.04028e-10	7.13133e-10
GOTERM_BP_DIRECT	GO:0001934~positive regulation of protein phosphorylation	17	7.32759	2.06602e-11	TGFB1, INSR, ADIPOQ, IGF2, SIRT1, TNF, MMP9, EGFR, VEGFA, CCND1, CHEK2, IL1B, ERBB2, KDR, AKT1, NKX3-1, MAPK3	232	127	16792	9.68857	5.68363e-08	3.53506e-09	3.13542e-09
GOTERM_BP_DIRECT	GO:0071407~cellular response to organic cyclic compound	13	5.60345	2.18451e-11	TGFB1, STAT1, STAT3, TNF, NFKBIA, CCNB1, CASP8, IL1B, CASP3, CYP1A1, CYP1B1, CCL2, AKT1	232	59	16792	15.948	6.00958e-08	3.53506e-09	3.13542e-09
GOTERM_BP_DIRECT	GO:0071222~cellular response to lipopolysaccharide	16	6.89655	4.16267e-11	IL10, CXCL8, NOS2, GSTP1, SERPINE1, MAPK14, TNF, RELA, ICAM1, CXCL10, IL6, MAPK8, IFNG, HSF1, CCL2, PPARD	232	113	16792	10.2484	1.14515e-07	6.36195e-09	5.64273e-09
GOTERM_BP_DIRECT	GO:0006954~inflammatory response	26	11.2069	9.3004e-11	CRP, CXCL8, PTGER3, PTGS2, TNF, CXCL2, RELA, PIK3CG, PTGS1, IKBKB, SPP1, CCL2, AKT1, OLR1, IL10, TGFB1, CHUK, FOS, SELE, IL1A, CXCL10, CXCL11, IL6, CD40LG, IL1B, NFE2L2	232	379	16792	4.96534	2.55854e-07	1.3466e-08	1.19437e-08
GOTERM_BP_DIRECT	GO:0071260~cellular response to mechanical stimulus	13	5.60345	2.16043e-10	TGFB1, BAD, PTGS2, EGFR, COL1A1, GJA1, MAPK8, CASP8, IL1B, IRF1, CHEK1, AKT1, MAPK3	232	71	16792	13.2525	5.94335e-07	2.97167e-08	2.63573e-08
GOTERM_BP_DIRECT	GO:0045429~positive regulation of nitric oxide biosynthetic process	11	4.74138	2.57451e-10	IL6, IFNG, IL1B, INSR, AKT1, OPRM1, PTGS2, ESR1, TNF, EGFR, ICAM1	232	43	16792	18.5156	7.08248e-07	3.37261e-08	2.99134e-08
GOTERM_BP_DIRECT	GO:0045907~positive regulation of vasoconstriction	10	4.31034	3.21637e-10	NFKBIA, TGFB1, NOS3, IL1B, MAPK1, CCL2, AKT1, MAPK14, TNF, MAPK3	232	32	16792	22.6185	8.84824e-07	3.83776e-08	3.4039e-08
GOTERM_BP_DIRECT	GO:0031663~lipopolysaccharide-mediated signaling pathway	10	4.31034	3.21637e-10	GJA1, CAV1, AKT1, ADRA1D, HTR2A, ADRA1B, PTGS2, ADRA1A, EGFR, ICAM1	232	32	16792	22.6185	8.84824e-07	3.83776e-08	3.4039e-08
GOTERM_BP_DIRECT	GO:0071356~cellular response to tumor necrosis factor	15	6.46552	3.3481e-10	VCAM1, CXCL8, CHUK, SLC2A4, SIRT1, RELA, ICAM1, COL1A1, IKBKB, IL6, CCL2, HAS2, APOB, NFE2L2, NKX3-1	232	110	16792	9.86991	9.21061e-07	3.83776e-08	3.4039e-08
GOTERM_BP_DIRECT	GO:0007584~response to nutrient	13	5.60345	3.57095e-10	NQO1, VCAM1, UGT1A1, STAT1, ADIPOQ, PTEN, AKR1C3, HMGCR, SLC6A4, IL4, POR, HSF1, PPARG	232	74	16792	12.7153	9.82367e-07	3.92947e-08	3.48524e-08
GOTERM_BP_DIRECT	GO:0007623~circadian rhythm	13	5.60345	4.19998e-10	SREBF1, GSK3B, JUN, NOS2, MTTP, ADIPOQ, SERPINE1, EGFR, SLC6A4, F7, CLDN4, CDK4, TOP1	232	75	16792	12.5457	1.15541e-06	4.4439e-08	3.94152e-08
GOTERM_BP_DIRECT	GO:0010629~negative regulation of gene expression	16	6.89655	6.66995e-10	RB1, OPRD1, CDKN1A, TGFB1, NOS2, ESR1, SIRT1, TNF, GJA1, CCNB1, IFNG, AKT1, PGR, XDH, LDLR, NKX3-1	232	137	16792	8.45306	1.8349e-06	6.79594e-08	6.02766e-08
GOTERM_BP_DIRECT	GO:0006915~apoptotic process	30	12.931	1.12666e-09	RB1, NCF1, PTEN, AHR, ADRA1A, CASP9, GJA1, CASP8, CASP3, PIM1, MAPK1, MAPK3, CDKN2A, PRKCB, STAT1, BAD, IGFBP3, MAPK14, NFKBIA, IL1A, IFNG, IRF1, IL1B, BCL2, CDK1, BAX, BIRC5, RAF1, TP53, PPARD	232	567	16792	3.82959	3.09944e-06	1.10694e-07	9.81805e-08
GOTERM_BP_DIRECT	GO:0001525~angiogenesis	19	8.18966	1.90282e-09	JUN, CXCL8, NOS3, EGF, MMP2, CAV1, SERPINE1, PTEN, PRKCA, PTGS2, MAPK14, HIF1A, SIRT1, PIK3CG, VEGFA, KDR, CYP1B1, CCL2, HMOX1	232	223	16792	6.16685	5.23463e-06	1.80505e-07	1.60099e-07
GOTERM_BP_DIRECT	GO:0035690~cellular response to drug	12	5.17241	2.38092e-09	KCNH2, PPP3CA, NOS2, CHEK2, MYC, IL1B, ADIPOQ, CCL2, TP53, EGFR, NKX3-1, NFE2L2	232	69	16792	12.5877	6.54989e-06	2.1833e-07	1.93648e-07
GOTERM_BP_DIRECT	GO:0048146~positive regulation of fibroblast proliferation	11	4.74138	2.81531e-09	CCNA2, CDKN1A, CCNB1, JUN, TGFB1, CDK4, MYC, E2F1, ESR1, EGFR, FOSL2	232	54	16792	14.7439	7.74488e-06	2.49836e-07	2.21592e-07
GOTERM_BP_DIRECT	GO:0043401~steroid hormone mediated signaling pathway	11	4.74138	4.90036e-09	RXRB, RXRA, NR1I3, NR1I2, PGR, PPARG, PPARA, RXRG, ESR1, NR3C2, PPARD	232	57	16792	13.9679	1.34808e-05	4.21278e-07	3.73652e-07
GOTERM_BP_DIRECT	GO:0008285~negative regulation of cell proliferation	24	10.3448	6.32862e-09	IL10, RB1, CDKN1A, JUN, TGFB1, CXCL8, CDKN2A, NOS3, IGFBP3, STAT3, PTEN, OPRM1, PTGS2, ADRA1A, IL1A, AR, IL6, IL1B, IRF1, HSF1, CYP1B1, RAF1, TP53, NKX3-1	232	396	16792	4.38662	1.74099e-05	5.27577e-07	4.67934e-07
GOTERM_BP_DIRECT	GO:0008283~cell proliferation	23	9.91379	7.38768e-09	ACHE, CHRM3, CHRM1, CHRM4, CHRM5, STAT3, PTEN, ADRA1D, ADRA1B, EGFR, IL1A, AR, MYC, ERBB2, CYP1A1, PIM1, BCL2, CDK1, AKT1, RAF1, TP53, BCL2L1, PPARD	232	366	16792	4.54843	2.03233e-05	5.9775e-07	5.30175e-07
GOTERM_BP_DIRECT	GO:0048661~positive regulation of smooth muscle cell proliferation	11	4.74138	8.25275e-09	IL6, JUN, STAT1, MYC, AKR1B1, HMOX1, AKT1, HMGCR, PTGS2, TNF, EGFR	232	60	16792	13.2695	2.2703e-05	6.48666e-07	5.75334e-07
GOTERM_BP_DIRECT	GO:0051591~response to cAMP	10	4.31034	1.06871e-08	COL1A1, SREBF1, THBD, JUN, STAT1, PDE3A, FOS, RELA, SLC6A3, DUOX2	232	46	16792	15.7346	2.93997e-05	8.1667e-07	7.24345e-07
GOTERM_BP_DIRECT	GO:0055114~oxidation-reduction process	29	12.5	1.23677e-08	MAOB, NCF1, MAOA, AKR1B1, HMGCR, CYP3A4, PTGS2, MPO, CYP19A1, PTGS1, ALOX5, CYP1B1, XDH, DUOX2, NQO1, VCAM1, HSD3B2, NOS2, NOS3, AKR1C1, DIO1, HSD3B1, GSR, AKR1C3, SOD1, POR, FASN, CYP1A2, CYP1A1	232	592	16792	3.54561	3.4023e-05	9.19555e-07	8.156e-07
GOTERM_BP_DIRECT	GO:0008630~intrinsic apoptotic signaling pathway in response to DNA damage	10	4.31034	1.30613e-08	CASP9, BAD, CHEK2, BCL2, E2F1, BAX, HMOX1, SIRT1, TNF, BCL2L1	232	47	16792	15.3999	3.59309e-05	9.45567e-07	8.38671e-07
GOTERM_BP_DIRECT	GO:0070374~positive regulation of ERK1 and ERK2 cascade	16	6.89655	1.97557e-08	JUN, TGFB1, PTEN, PRKCA, HMGCR, HTR2A, OPRM1, ADRA1A, TNF, EGFR, ICAM1, VEGFA, IL6, KDR, CCL2, MAPK3	232	175	16792	6.61754	5.43465e-05	1.39354e-06	1.236e-06
GOTERM_BP_DIRECT	GO:0007165~signal transduction	42	18.1034	2.03625e-08	GRIA2, CHRM3, CHRM1, CHRNA2, CXCL8, CHRM4, NR1I3, CHRNA7, NR1I2, HIF1A, ADRA1A, EGFR, NR3C2, THBD, GJA1, ERBB3, PLAU, ERBB2, CCL2, AKT1, MAPK1, GABRA6, PRKCB, EGF, GABRA5, STAT3, HTR3A, MAPK14, ESR1, ADRA2A, ESR2, MAPK10, CXCL10, AR, CLDN4, CXCL11, CDK4, RASA1, IL1B, PPARG, PGR, RAF1	232	1161	16792	2.61837	5.60156e-05	1.40043e-06	1.24211e-06
GOTERM_BP_DIRECT	GO:0042542~response to hydrogen peroxide	10	4.31034	2.7801e-08	COL1A1, JUN, STAT1, BAD, CASP3, CAT, BCL2, HMOX1, SIRT1, SOD1	232	51	16792	14.192	7.64776e-05	1.86538e-06	1.6545e-06
GOTERM_BP_DIRECT	GO:0007271~synaptic transmission, cholinergic	9	3.87931	3.11054e-08	CHRM2, NQO1, CHRM3, CHRM1, CHRNA2, CHRNA7, CHRM4, CHRM5, HTR3A	232	37	16792	17.6058	8.55674e-05	2.03741e-06	1.80708e-06
GOTERM_BP_DIRECT	GO:0051090~regulation of sequence-specific DNA binding transcription factor activity	8	3.44828	3.31447e-08	MAPK10, JUN, MAPK8, HMOX1, MAPK1, FOS, MAPK14, MAPK3	232	25	16792	23.1614	9.1177e-05	2.12049e-06	1.88077e-06
GOTERM_BP_DIRECT	GO:0043065~positive regulation of apoptotic process	20	8.62069	3.5832e-08	NCOA1, TOP2A, TGFB1, CDKN2A, BAD, IGFBP3, PTGS2, SIRT1, TNF, SOD1, IL6, MAPK8, CDK4, KCNMA1, BAX, CYP1B1, AKT1, HMOX1, TP53, BCL2L1	232	300	16792	4.82529	9.85691e-05	2.24032e-06	1.98705e-06
GOTERM_BP_DIRECT	GO:0032570~response to progesterone	9	3.87931	4.84076e-08	NCOA1, SREBF1, CLDN4, TGFB1, BAD, CAV1, CCL2, FOS, RELA	232	39	16792	16.7029	0.00013316	2.95931e-06	2.62476e-06
GOTERM_BP_DIRECT	GO:0032869~cellular response to insulin stimulus	11	4.74138	9.79075e-08	GOT1, PARP1, STAT1, MYC, GSTP1, INSR, ADIPOQ, CCL2, AKT1, PPARG, SLC2A4	232	77	16792	10.3399	0.000269307	5.8553e-06	5.19336e-06
GOTERM_BP_DIRECT	GO:0006805~xenobiotic metabolic process	11	4.74138	1.10966e-07	NQO1, POR, GSTP1, AKR1C1, CYP1A2, NR1I2, CYP1B1, AHR, CYP3A4, CES1, PTGS1	232	78	16792	10.2073	0.000305221	6.49505e-06	5.76079e-06
GOTERM_BP_DIRECT	GO:0043536~positive regulation of blood vessel endothelial cell migration	7	3.01724	1.48366e-07	TGFB1, HSPB1, AKT1, PRKCA, MAPK14, NFE2L2, VEGFA	232	19	16792	26.6661	0.000408071	8.50322e-06	7.54193e-06
GOTERM_BP_DIRECT	GO:0043200~response to amino acid	8	3.44828	1.69008e-07	CXCL10, PARP1, CHEK2, MYC, BCL2, BAX, CCL2, TP53	232	31	16792	18.6785	0.000464832	9.29881e-06	8.24758e-06
GOTERM_BP_DIRECT	GO:0010332~response to gamma radiation	8	3.44828	1.69008e-07	IL6, CHUK, BAD, CASP3, GSTP1, CCL2, RELA, ICAM1	232	31	16792	18.6785	0.000464832	9.29881e-06	8.24758e-06
GOTERM_BP_DIRECT	GO:0006367~transcription initiation from RNA polymerase II promoter	14	6.03448	1.82651e-07	NR1I3, NR1I2, ESR1, ESR2, NR3C2, RXRB, AR, RXRA, E2F2, PGR, PPARG, PPARA, RXRG, PPARD	232	152	16792	6.66652	0.000502348	9.85243e-06	8.73861e-06
GOTERM_BP_DIRECT	GO:0046677~response to antibiotic	8	3.44828	2.13812e-07	CASP9, IL6, CASP8, CASP3, CYP1A1, CCL2, TP53, SOD1	232	32	16792	18.0948	0.000588025	1.13115e-05	1.00327e-05
GOTERM_BP_DIRECT	GO:0031100~organ regeneration	9	3.87931	2.25061e-07	CCNA2, F7, CDKN1A, UGT1A1, CDK4, GSTP1, CDK1, CCL2, PPARG	232	47	16792	13.8599	0.000618952	1.15426e-05	1.02377e-05
GOTERM_BP_DIRECT	GO:0051897~positive regulation of protein kinase B signaling	11	4.74138	2.26572e-07	F7, IL6, TGFB1, F10, INSR, AKR1C3, IGF2, TNF, F3, EGFR, PIK3CG	232	84	16792	9.47824	0.000623105	1.15426e-05	1.02377e-05
GOTERM_BP_DIRECT	GO:0030335~positive regulation of cell migration	15	6.46552	2.6155e-07	TGFB1, F10, INSR, PRKCA, F3, EGFR, ADRA2A, VEGFA, COL1A1, F7, PLAU, KDR, MAPK1, HAS2, DRD1	232	184	16792	5.90049	0.000719265	1.30822e-05	1.16033e-05
GOTERM_BP_DIRECT	GO:0051092~positive regulation of NF-kappaB transcription factor activity	13	5.60345	3.05803e-07	TGFB1, CHUK, PRKCB, TNF, RELA, ICAM1, NFKBIA, IKBKB, AR, IL6, CD40LG, IL1B, CAT	232	133	16792	7.07467	0.000840911	1.50226e-05	1.33243e-05
GOTERM_BP_DIRECT	GO:0008203~cholesterol metabolic process	10	4.31034	3.6765e-07	IL4, SREBF1, RXRA, SOAT1, SOAT2, PON1, CAT, APOB, LDLR, PPARD	232	68	16792	10.644	0.0010109	1.7744e-05	1.5738e-05
GOTERM_BP_DIRECT	GO:0033138~positive regulation of peptidyl-serine phosphorylation	10	4.31034	4.73746e-07	OPRD1, GSK3B, IL6, TGFB1, CAV1, BCL2, AKT1, RAF1, TNF, VEGFA	232	70	16792	10.3399	0.00130243	2.20894e-05	1.95922e-05
GOTERM_BP_DIRECT	GO:0007265~Ras protein signal transduction	10	4.31034	4.73746e-07	RB1, CCNA2, CDKN1A, RASSF1, JUN, CDKN2A, CDK2, MAPK14, TP53, ADRA2A	232	70	16792	10.3399	0.00130243	2.20894e-05	1.95922e-05
GOTERM_BP_DIRECT	GO:0010742~macrophage derived foam cell differentiation	5	2.15517	5.12273e-07	TGFB1, SOAT1, SOAT2, STAT1, PPARG	232	6	16792	60.3161	0.00140827	2.34877e-05	2.08325e-05
GOTERM_BP_DIRECT	GO:0035094~response to nicotine	8	3.44828	6.16843e-07	VCAM1, CHRNA2, CHRNA7, CASP3, BCL2, HMOX1, ABAT, SLC6A3	232	37	16792	15.6496	0.0016955	2.78186e-05	2.46737e-05
GOTERM_BP_DIRECT	GO:0030522~intracellular receptor signaling pathway	8	3.44828	7.47339e-07	NCOA1, NCOA2, AR, STAT3, NR1I2, AHR, PPARA, PPARD	232	38	16792	15.2377	0.00205382	3.31601e-05	2.94114e-05
GOTERM_BP_DIRECT	GO:0006974~cellular response to DNA damage stimulus	15	6.46552	1.15499e-06	TOP2A, CDKN1A, PARP1, SIRT1, CASP9, RASSF1, CCND1, CHEK2, MYC, CHEK1, BCL2, AKT1, MAPK1, TP53, MAPK3	232	208	16792	5.21966	0.00317233	5.04344e-05	4.47328e-05
GOTERM_BP_DIRECT	GO:0007197~adenylate cyclase-inhibiting G-protein coupled acetylcholine receptor signaling pathway	5	2.15517	1.18239e-06	CHRM2, CHRM3, CHRM1, CHRM4, CHRM5	232	7	16792	51.6995	0.00324746	5.08241e-05	4.50784e-05
GOTERM_BP_DIRECT	GO:0018105~peptidyl-serine phosphorylation	12	5.17241	1.23266e-06	GSK3B, MAPK8, PRKCB, CHEK2, CDK2, BCL2, CDK1, MAPK1, AKT1, PRKCA, MAPK14, MAPK3	232	125	16792	6.94841	0.00338532	5.21701e-05	4.62723e-05
GOTERM_BP_DIRECT	GO:0042593~glucose homeostasis	11	4.74138	1.28588e-06	IL6, BAD, INSR, STAT3, ADIPOQ, AKT1, PPARG, SLC2A4, ADRA1B, HIF1A, ADRA2A	232	101	16792	7.8829	0.00353122	5.3598e-05	4.75388e-05
GOTERM_BP_DIRECT	GO:0043406~positive regulation of MAP kinase activity	9	3.87931	1.3771e-06	TGFB1, EGF, ERBB2, HTR2A, TNF, EGFR, ADRA2A, PIK3CG, VEGFA	232	59	16792	11.0409	0.00378125	5.65435e-05	5.01513e-05
GOTERM_BP_DIRECT	GO:0006468~protein phosphorylation	22	9.48276	1.40762e-06	GSK3B, TGFB1, CHUK, PRKCB, IGFBP3, PRKCA, PIK3CG, MAPK10, IKBKB, MAPK8, CCND1, CDK4, CHEK2, HSF1, ERBB2, PIM1, CCL2, BIRC5, AKT1, MAPK1, RAF1, MAPK3	232	456	16792	3.49198	0.00386489	5.69466e-05	5.05088e-05
GOTERM_BP_DIRECT	GO:0007595~lactation	8	3.44828	1.52459e-06	RXRA, IL1B, MMP2, SPP1, PTGS2, MMP9, SOD1, PPARD	232	42	16792	13.7865	0.00418538	5.99165e-05	5.3143e-05
GOTERM_BP_DIRECT	GO:0007566~embryo implantation	8	3.44828	1.52459e-06	NCOA1, CCND1, CAV1, HIF1A, XDH, SLC6A3, HK2, VEGFA	232	42	16792	13.7865	0.00418538	5.99165e-05	5.3143e-05
GOTERM_BP_DIRECT	GO:0035994~response to muscle stretch	6	2.58621	1.82113e-06	NFKBIA, JUN, FOS, RAF1, MAPK14, RELA	232	16	16792	27.1422	0.00499741	6.99915e-05	6.20789e-05
GOTERM_BP_DIRECT	GO:0051091~positive regulation of sequence-specific DNA binding transcription factor activity	11	4.74138	1.84046e-06	IL10, IL4, PPP3CA, IL6, IL1B, PTEN, AKT1, PPARG, ESR1, TNF, ESR2	232	105	16792	7.58259	0.00505031	6.99915e-05	6.20789e-05
GOTERM_BP_DIRECT	GO:0000060~protein import into nucleus, translocation	7	3.01724	1.85728e-06	NFKBIA, OPRD1, TGFB1, IFNG, AKR1C3, AKT1, TNF	232	28	16792	18.0948	0.00509635	6.99915e-05	6.20789e-05
GOTERM_BP_DIRECT	GO:0006919~activation of cysteine-type endopeptidase activity involved in apoptotic process	10	4.31034	2.05083e-06	CASP8, CDKN2A, BAD, CASP3, BAX, PPARG, TNF, F3, XDH, NKX3-1	232	83	16792	8.7204	0.00562596	7.62411e-05	6.76221e-05
GOTERM_BP_DIRECT	GO:0000187~activation of MAPK activity	11	4.74138	2.18861e-06	MAPK10, EGF, IL1B, CHRNA7, INSR, CDK1, MAPK1, MAPK14, TNF, SOD1, MAPK3	232	107	16792	7.44086	0.00600278	8.02782e-05	7.12028e-05
GOTERM_BP_DIRECT	GO:0097421~liver regeneration	7	3.01724	2.315e-06	IL10, NFKBIA, TGFB1, CCND1, MYC, HMOX1, EGFR	232	29	16792	17.4709	0.00634833	8.3574e-05	7.4126e-05
GOTERM_BP_DIRECT	GO:0007207~phospholipase C-activating G-protein coupled acetylcholine receptor signaling pathway	5	2.15517	2.33922e-06	CHRM2, CHRM3, CHRM1, CHRM4, CHRM5	232	8	16792	45.2371	0.00641455	8.3574e-05	7.4126e-05
GOTERM_BP_DIRECT	GO:0051384~response to glucocorticoid	9	3.87931	2.92006e-06	IL10, IL6, GOT1, BAD, CASP3, ADIPOQ, BCL2, PTGS2, TNF	232	65	16792	10.0218	0.00800091	0.000102988	9.13454e-05
GOTERM_BP_DIRECT	GO:0071392~cellular response to estradiol stimulus	7	3.01724	3.50665e-06	IL10, CCNA2, IL6, UGT1A1, HSF1, ESR1, EGFR	232	31	16792	16.3437	0.00960042	0.000122111	0.000108307
GOTERM_BP_DIRECT	GO:0000165~MAPK cascade	16	6.89655	3.60332e-06	TGFB1, EGF, CAV1, TNF, EGFR, IL2, ERBB3, MYC, RASA1, IL1B, PSMD3, ERBB2, CCL2, MAPK1, RAF1, MAPK3	232	262	16792	4.42011	0.00986378	0.000123909	0.000109901
GOTERM_BP_DIRECT	GO:0050665~hydrogen peroxide biosynthetic process	5	2.15517	4.16513e-06	CRP, TGFB1, GSTP1, EGFR, SOD1	232	9	16792	40.2107	0.0113929	0.000139735	0.000123938
GOTERM_BP_DIRECT	GO:0032930~positive regulation of superoxide anion generation	5	2.15517	4.16513e-06	MAOB, CYP1A2, CYP1A1, DUOX2, SOD1	232	9	16792	40.2107	0.0113929	0.000139735	0.000123938
GOTERM_BP_DIRECT	GO:0030168~platelet activation	11	4.74138	4.21877e-06	COL1A1, IL6, CD40LG, PRKCB, MAPK1, AKT1, PRKCA, RAF1, ADRA2A, PIK3CG, MAPK3	232	115	16792	6.92324	0.0115388	0.000139829	0.000124022
GOTERM_BP_DIRECT	GO:0001938~positive regulation of endothelial cell proliferation	9	3.87931	4.61421e-06	JUN, KDR, CCL2, AKT1, PRKCA, HIF1A, SIRT1, F3, VEGFA	232	69	16792	9.44078	0.0126135	0.000151115	0.000134032
GOTERM_BP_DIRECT	GO:0071880~adenylate cyclase-activating adrenergic receptor signaling pathway	6	2.58621	4.6872e-06	ADRA1D, ADRB1, ADRB2, ADRA1B, ADRA1A, ADRA2A	232	19	16792	22.8566	0.0128117	0.0001517	0.00013455
GOTERM_BP_DIRECT	GO:0043491~protein kinase B signaling	7	3.01724	5.15505e-06	BAD, CAV1, BCL2, BAX, TP53, BCL2L1, NKX3-1	232	33	16792	15.3532	0.0140815	0.000163006	0.000144578
GOTERM_BP_DIRECT	GO:2001244~positive regulation of intrinsic apoptotic signaling pathway	7	3.01724	5.15505e-06	TGFB1, IL1B, PTEN, CCL2, AKT1, TNF, NKX3-1	232	33	16792	15.3532	0.0140815	0.000163006	0.000144578
GOTERM_BP_DIRECT	GO:0071347~cellular response to interleukin-1	9	3.87931	5.73416e-06	IL6, CXCL8, MYC, CCL2, HAS2, HIF1A, RELA, ICAM1, NKX3-1	232	71	16792	9.17484	0.0156509	0.000179258	0.000158992
GOTERM_BP_DIRECT	GO:1902895~positive regulation of pri-miRNA transcription from RNA polymerase II promoter	6	2.58621	6.17975e-06	JUN, TGFB1, STAT3, FOS, HIF1A, RELA	232	20	16792	21.7138	0.0168569	0.000191017	0.000169422
GOTERM_BP_DIRECT	GO:0045080~positive regulation of chemokine biosynthetic process	5	2.15517	6.86694e-06	IL4, IFNG, IL1B, HMOX1, TNF	232	10	16792	36.1897	0.0187137	0.000207593	0.000184125
GOTERM_BP_DIRECT	GO:0046902~regulation of mitochondrial membrane permeability	5	2.15517	6.86694e-06	BAD, STAT3, BCL2, TP53, BCL2L1	232	10	16792	36.1897	0.0187137	0.000207593	0.000184125
GOTERM_BP_DIRECT	GO:0032094~response to food	6	2.58621	8.02031e-06	SREBF1, CHRNA7, CYP1A1, AKT1, OPRM1, MPO	232	21	16792	20.6798	0.0218223	0.000239825	0.000212713
GOTERM_BP_DIRECT	GO:0009409~response to cold	7	3.01724	8.75857e-06	CXCL10, IL6, CASP8, ADRB1, PPARG, FOS, ADRB2	232	36	16792	14.0738	0.023807	0.000259084	0.000229795
GOTERM_BP_DIRECT	GO:0018107~peptidyl-threonine phosphorylation	7	3.01724	1.2132e-05	GSK3B, MAPK8, CHEK1, BCL2, CDK1, MAPK1, AKT1	232	38	16792	13.333	0.0328244	0.000355053	0.000314915
GOTERM_BP_DIRECT	GO:0070301~cellular response to hydrogen peroxide	8	3.44828	1.25408e-05	IL6, HSF1, CDK1, AKR1B1, CYP1B1, SIRT1, RELA, NFE2L2	232	57	16792	10.1585	0.0339116	0.000363155	0.0003221
GOTERM_BP_DIRECT	GO:0035924~cellular response to vascular endothelial growth factor stimulus	6	2.58621	1.29678e-05	VCAM1, KDR, HSPB1, AKT1, MAPK14, VEGFA	232	23	16792	18.8816	0.0350458	0.000371608	0.000329598
GOTERM_BP_DIRECT	GO:0042060~wound healing	9	3.87931	1.40499e-05	IL6, ERBB3, CASP3, ERBB2, OPRM1, RAF1, PPARA, EGFR, PPARD	232	80	16792	8.14267	0.0379141	0.000395716	0.00035098
GOTERM_BP_DIRECT	GO:0051592~response to calcium ion	8	3.44828	1.40968e-05	PPP3CA, IL6, CCND1, BAD, CAV1, KCNMA1, MTTP, EGFR	232	58	16792	9.98335	0.0380381	0.000395716	0.00035098
GOTERM_BP_DIRECT	GO:0043524~negative regulation of neuron apoptotic process	11	4.74138	1.44112e-05	JUN, ERBB3, GABRA5, RASA1, BCL2, BAX, HMOX1, CCL2, BIRC5, BCL2L1, SOD1	232	132	16792	6.03161	0.0388698	0.000400456	0.000355185
GOTERM_BP_DIRECT	GO:0043410~positive regulation of MAPK cascade	9	3.87931	1.54069e-05	AR, IL6, INSR, IGFBP3, IGF2, KDR, ADRB2, ADRA1B, ADRA1A	232	81	16792	8.04215	0.0414991	0.000423845	0.000375929
GOTERM_BP_DIRECT	GO:0090399~replicative senescence	5	2.15517	1.5839e-05	CDKN1A, CDKN2A, CHEK2, CHEK1, TP53	232	12	16792	30.158	0.0426377	0.000431416	0.000382645
GOTERM_BP_DIRECT	GO:0050679~positive regulation of epithelial cell proliferation	8	3.44828	1.76896e-05	IL6, TGFB1, BAD, MYC, ERBB2, SCN5A, EGFR, VEGFA	232	60	16792	9.65057	0.0474994	0.000477099	0.000423163
GOTERM_BP_DIRECT	GO:0045892~negative regulation of transcription, DNA-templated	21	9.05172	1.96646e-05	RB1, JUN, TGFB1, CDKN2A, NR1I3, NR1I2, ADIPOQ, AHR, SIRT1, TNF, RELA, RUNX2, IL4, IRF1, E2F1, BIRC5, PPARG, TP53, NKX3-1, PPARD, RUNX1T1	232	499	16792	3.04602	0.0526607	0.000525217	0.000465842
GOTERM_BP_DIRECT	GO:0007569~cell aging	6	2.58621	2.0021e-05	BCL2, CDK1, SIRT1, TP53, ICAM1, SOD1	232	25	16792	17.371	0.0535889	0.000529593	0.000469723
GOTERM_BP_DIRECT	GO:0009615~response to virus	10	4.31034	2.10139e-05	CHRM2, IKBKB, IFNG, CHUK, ODC1, CYP1A1, HSPB1, APOB, TNF, DUOX2	232	110	16792	6.57994	0.0561706	0.000550565	0.000488323
GOTERM_BP_DIRECT	GO:0006977~DNA damage response, signal transduction by p53 class mediator resulting in cell cycle arrest	8	3.44828	2.2007e-05	CDKN1A, CCNB1, CHEK2, CDK2, CDK1, E2F1, BAX, TP53	232	62	16792	9.33927	0.0587457	0.000560858	0.000497453
GOTERM_BP_DIRECT	GO:0045599~negative regulation of fat cell differentiation	7	3.01724	2.20184e-05	MYC, BCL2, BAX, BCL2L1, ICAM1, SOD1, VEGFA	232	42	16792	12.0632	0.0587752	0.000560858	0.000497453
GOTERM_BP_DIRECT	GO:0001541~ovarian follicle development	7	3.01724	2.20184e-05	IL6, TGFB1, ADIPOQ, E2F1, SIRT1, TNF, RUNX1T1	232	42	16792	12.0632	0.0587752	0.000560858	0.000497453
GOTERM_BP_DIRECT	GO:0010745~negative regulation of macrophage derived foam cell differentiation	5	2.15517	2.26319e-05	NQO1, NOS2, NOS3, CYP1B1, AKT1	232	13	16792	27.8382	0.0603624	0.000566002	0.000502016
GOTERM_BP_DIRECT	GO:0006809~nitric oxide biosynthetic process	5	2.15517	2.26319e-05	NFKBIA, CRP, ADIPOQ, PPARG, PPARA	232	13	16792	27.8382	0.0603624	0.000566002	0.000502016
GOTERM_BP_DIRECT	GO:0031622~positive regulation of fever generation	4	1.72414	2.518e-05	IL1B, PTGER3, PTGS2, TNF	232	5	16792	57.9034	0.0669264	0.000615861	0.000546238
GOTERM_BP_DIRECT	GO:0008202~steroid metabolic process	7	3.01724	2.52971e-05	IL10, HSF1, ADIPOQ, CAT, CDK1, CCL2, PPARD	232	43	16792	11.7827	0.0672268	0.000615861	0.000546238
GOTERM_BP_DIRECT	GO:0014823~response to activity	7	3.01724	2.52971e-05	UGT1A1, SULT1E1, NR1I2, AKR1C3, CYP1A1, CYP1B1, CYP3A4	232	43	16792	11.7827	0.0672268	0.000615861	0.000546238
GOTERM_BP_DIRECT	GO:0042632~cholesterol homeostasis	8	3.44828	2.71581e-05	SOAT1, SOAT2, CAV1, AKR1C1, MTTP, APOB, SIRT1, LDLR	232	64	16792	9.04741	0.0719903	0.000655369	0.00058128
GOTERM_BP_DIRECT	GO:0010575~positive regulation of vascular endothelial growth factor production	6	2.58621	2.97466e-05	IL1A, TGFB1, IL1B, CYP1B1, PTGS2, HIF1A	232	27	16792	16.0843	0.0785752	0.00071159	0.000631145
GOTERM_BP_DIRECT	GO:0043627~response to estrogen	8	3.44828	3.00834e-05	F7, CCND1, CA2, CAV1, HMOX1, MAPK1, PPARG, ESR1	232	65	16792	8.90822	0.0794287	0.000713444	0.00063279
GOTERM_BP_DIRECT	GO:0007200~phospholipase C-activating G-protein coupled receptor signaling pathway	8	3.44828	3.32631e-05	OPRD1, PTGER3, ADRA1D, HTR2A, OPRM1, ADRA1B, ESR1, ADRA1A	232	66	16792	8.77325	0.0874461	0.000782108	0.000693691
GOTERM_BP_DIRECT	GO:2000352~negative regulation of endothelial cell apoptotic process	6	2.58621	3.58095e-05	IL10, IL4, SERPINE1, KDR, ICAM1, NFE2L2	232	28	16792	15.5099	0.0938167	0.000834847	0.000740467
GOTERM_BP_DIRECT	GO:0038095~Fc-epsilon receptor signaling pathway	12	5.17241	3.65394e-05	MAPK10, NFKBIA, IKBKB, PPP3CA, JUN, MAPK8, CHUK, PSMD3, MAPK1, FOS, RELA, MAPK3	232	178	16792	4.8795	0.0956346	0.000844705	0.000749211
GOTERM_BP_DIRECT	GO:0009749~response to glucose	8	3.44828	4.04532e-05	SREBF1, GJA1, TGFB1, BAD, CASP3, ADIPOQ, PTEN, PPARD	232	68	16792	8.51521	0.10532	0.000927389	0.000822548
GOTERM_BP_DIRECT	GO:0007213~G-protein coupled acetylcholine receptor signaling pathway	5	2.15517	4.22802e-05	CHRM2, CHRM3, CHRM1, CHRM4, CHRM5	232	15	16792	24.1264	0.109806	0.000949262	0.000841948
GOTERM_BP_DIRECT	GO:0051781~positive regulation of cell division	7	3.01724	4.2558e-05	IL1A, TGFB1, IL1B, CAT, IGF2, NKX3-1, VEGFA	232	47	16792	10.7799	0.110486	0.000949262	0.000841948
GOTERM_BP_DIRECT	GO:0048662~negative regulation of smooth muscle cell proliferation	6	2.58621	4.27875e-05	GJA1, NOS2, NOS3, HMOX1, EGFR, PPARD	232	29	16792	14.975	0.111047	0.000949262	0.000841948
GOTERM_BP_DIRECT	GO:0045909~positive regulation of vasodilation	6	2.58621	4.27875e-05	IFNG, IGFBP3, ADIPOQ, HMOX1, PPARG, PPARD	232	29	16792	14.975	0.111047	0.000949262	0.000841948
GOTERM_BP_DIRECT	GO:0030308~negative regulation of cell growth	10	4.31034	4.48662e-05	CDKN1A, GJA1, TGFB1, CDKN2A, BCL2, PPARG, SIRT1, TP53, ESR2, PPARD	232	121	16792	5.98176	0.116116	0.000987416	0.000875789
GOTERM_BP_DIRECT	GO:1900740~positive regulation of protein insertion into mitochondrial membrane involved in apoptotic signaling pathway	6	2.58621	5.07729e-05	CDKN1A, AKR1C3, MAPK14, TP53, XDH, NFE2L2	232	30	16792	14.4759	0.130363	0.00109981	0.000975479
GOTERM_BP_DIRECT	GO:2000379~positive regulation of reactive oxygen species metabolic process	6	2.58621	5.07729e-05	MAPK8, CASP8, BAD, BCL2, E2F1, TP53	232	30	16792	14.4759	0.130363	0.00109981	0.000975479
GOTERM_BP_DIRECT	GO:0042127~regulation of cell proliferation	12	5.17241	5.19805e-05	NFKBIA, CXCL10, CXCL11, JUN, ERBB3, NOS2, PLAU, CHEK1, SIRT1, TNF, CXCL2, PTGS1	232	185	16792	4.69487	0.133248	0.00111081	0.00098523
GOTERM_BP_DIRECT	GO:0007267~cell-cell signaling	14	6.03448	5.2088e-05	IL10, ADRA1D, ADRB1, ADRB2, ADRA1B, ADRA1A, IL2, ESR2, CXCL10, AR, CXCL11, GJA1, IL1B, PGR	232	254	16792	3.98941	0.133504	0.00111081	0.00098523
GOTERM_BP_DIRECT	GO:0000122~negative regulation of transcription from RNA polymerase II promoter	25	10.7759	5.80148e-05	RB1, TNF, RELA, RXRA, CCND1, MYC, HSF1, E2F1, SREBF1, NCOA2, TGFB1, PARP1, STAT1, CAV1, STAT3, ESR1, SIRT1, ESR2, VEGFA, IFNG, PKIA, PPARG, PPARA, TP53, PPARD	232	720	16792	2.51317	0.147518	0.00122768	0.00108889
GOTERM_BP_DIRECT	GO:0055093~response to hyperoxia	5	2.15517	7.21406e-05	HSF1, CYP1A2, AKR1C3, HMOX1, SOD1	232	17	16792	21.288	0.180012	0.00149217	0.00132348
GOTERM_BP_DIRECT	GO:0060749~mammary gland alveolus development	5	2.15517	7.21406e-05	COL1A1, CDKN1A, CDK4, CAT, CYP1A1	232	17	16792	21.288	0.180012	0.00149217	0.00132348
GOTERM_BP_DIRECT	GO:0071276~cellular response to cadmium ion	5	2.15517	7.21406e-05	AR, CCND1, EGF, ESR1, VEGFA	232	17	16792	21.288	0.180012	0.00149217	0.00132348
GOTERM_BP_DIRECT	GO:1902042~negative regulation of extrinsic apoptotic signaling pathway via death domain receptors	6	2.58621	8.17658e-05	CASP8, NOS3, SERPINE1, HMOX1, RAF1, ICAM1	232	33	16792	13.1599	0.201441	0.0016662	0.00147784
GOTERM_BP_DIRECT	GO:0071364~cellular response to epidermal growth factor stimulus	6	2.58621	8.17658e-05	COL1A1, MYC, GSTP1, ERBB2, AKT1, EGFR	232	33	16792	13.1599	0.201441	0.0016662	0.00147784
GOTERM_BP_DIRECT	GO:0030225~macrophage differentiation	5	2.15517	9.17542e-05	CASP8, PARP1, SIRT1, MMP9, VEGFA	232	18	16792	20.1054	0.223087	0.001856	0.00164618
GOTERM_BP_DIRECT	GO:0008637~apoptotic mitochondrial changes	5	2.15517	0.000114972	CDKN2A, BAX, AKT1, HK2, BCL2L1	232	19	16792	19.0472	0.271164	0.00230867	0.00204768
GOTERM_BP_DIRECT	GO:0050731~positive regulation of peptidyl-tyrosine phosphorylation	8	3.44828	0.000134811	IL6, TGFB1, ADIPOQ, IGF2, HTR2A, TP53, ICAM1, VEGFA	232	82	16792	7.0614	0.30988	0.00266811	0.00236648
GOTERM_BP_DIRECT	GO:0010888~negative regulation of lipid storage	4	1.72414	0.000136751	NFKBIA, CRP, IL6, TNF	232	8	16792	36.1897	0.313555	0.00266811	0.00236648
GOTERM_BP_DIRECT	GO:0034383~low-density lipoprotein particle clearance	4	1.72414	0.000136751	ADIPOQ, HMOX1, APOB, LDLR	232	8	16792	36.1897	0.313555	0.00266811	0.00236648
GOTERM_BP_DIRECT	GO:0045348~positive regulation of MHC class II biosynthetic process	4	1.72414	0.000136751	IL10, IL4, IFNG, SIRT1	232	8	16792	36.1897	0.313555	0.00266811	0.00236648
GOTERM_BP_DIRECT	GO:2001240~negative regulation of extrinsic apoptotic signaling pathway in absence of ligand	6	2.58621	0.000143601	IL1A, IL1B, BCL2, AKT1, TNF, BCL2L1	232	37	16792	11.7372	0.326371	0.00278202	0.00246751
GOTERM_BP_DIRECT	GO:0007050~cell cycle arrest	10	4.31034	0.000146566	RB1, CDKN1A, RASSF1, TGFB1, CXCL8, IFNG, CDKN2A, MYC, IRF1, TP53	232	141	16792	5.13328	0.331843	0.0028196	0.00250085
GOTERM_BP_DIRECT	GO:0035902~response to immobilization stress	5	2.15517	0.000173735	CHRM3, ADRA1D, ADRA1B, PTGS2, ADRA1A	232	21	16792	17.2332	0.379969	0.00329617	0.00292354
GOTERM_BP_DIRECT	GO:0045987~positive regulation of smooth muscle contraction	5	2.15517	0.000173735	TGFB1, CYP1A2, CYP1A1, PPARG, FOS	232	21	16792	17.2332	0.379969	0.00329617	0.00292354
GOTERM_BP_DIRECT	GO:1901215~negative regulation of neuron death	6	2.58621	0.000209626	IL6, HSF1, STAT3, AKT1, PPARA, SIRT1	232	40	16792	10.8569	0.438275	0.00385254	0.00341701
GOTERM_BP_DIRECT	GO:0043124~negative regulation of I-kappaB kinase/NF-kappaB signaling	6	2.58621	0.000209626	BAD, MYC, HSF1, SIRT1, TNF, NKX3-1	232	40	16792	10.8569	0.438275	0.00385254	0.00341701
GOTERM_BP_DIRECT	GO:0043280~positive regulation of cysteine-type endopeptidase activity involved in apoptotic process	6	2.58621	0.000209626	CASP8, STAT1, GSTP1, ADIPOQ, ESR1, SIRT1	232	40	16792	10.8569	0.438275	0.00385254	0.00341701
GOTERM_BP_DIRECT	GO:0007214~gamma-aminobutyric acid signaling pathway	5	2.15517	0.000210062	GABRA2, GABRA1, GABRA6, GABRA5, GABRA3	232	22	16792	16.4498	0.438948	0.00385254	0.00341701
GOTERM_BP_DIRECT	GO:0010165~response to X-ray	5	2.15517	0.000210062	THBD, CDKN1A, CCND1, CASP3, TP53	232	22	16792	16.4498	0.438948	0.00385254	0.00341701
GOTERM_BP_DIRECT	GO:0006955~immune response	17	7.32759	0.00024692	IL10, OPRD1, CXCL8, CHUK, CXCL2, TNF, IL2, IL4, IL1A, CXCL10, CXCL11, IL6, CD40LG, IFNG, SLPI, IL1B, CCL2	232	421	16792	2.92268	0.493059	0.00449852	0.00398996
GOTERM_BP_DIRECT	GO:0001836~release of cytochrome c from mitochondria	5	2.15517	0.000251555	JUN, BAD, BCL2, BAX, BCL2L1	232	23	16792	15.7346	0.499484	0.00455282	0.00403813
GOTERM_BP_DIRECT	GO:0097191~extrinsic apoptotic signaling pathway	6	2.58621	0.000265018	TGFB1, CASP8, IFNG, BAD, BAX, TNF	232	42	16792	10.3399	0.517687	0.00476513	0.00422643
GOTERM_BP_DIRECT	GO:0050900~leukocyte migration	9	3.87931	0.000284834	COL1A1, THBD, MMP1, CAV1, OLR1, APOB, SELE, MMP9, ICAM1	232	122	16792	5.33946	0.543283	0.00505535	0.00448384
GOTERM_BP_DIRECT	GO:0006935~chemotaxis	9	3.87931	0.000284834	IL4, CXCL10, CXCL11, CXCL8, PLAU, MAPK1, CCL2, MAPK14, CXCL2	232	122	16792	5.33946	0.543283	0.00505535	0.00448384
GOTERM_BP_DIRECT	GO:0051146~striated muscle cell differentiation	4	1.72414	0.000287121	RB1, CHUK, AKT1, MAPK14	232	10	16792	28.9517	0.546147	0.00506326	0.00449086
GOTERM_BP_DIRECT	GO:0043525~positive regulation of neuron apoptotic process	6	2.58621	0.00029656	CASP9, NQO1, JUN, CASP3, BAX, TP53	232	43	16792	10.0994	0.557785	0.00519641	0.00460896
GOTERM_BP_DIRECT	GO:0032868~response to insulin	7	3.01724	0.000314675	MYC, ADIPOQ, IGF2, AKT1, MAPK14, TNF, PPARD	232	67	16792	7.56202	0.579288	0.00544447	0.00482898
GOTERM_BP_DIRECT	GO:0006006~glucose metabolic process	7	3.01724	0.000314675	IL10, IL6, EIF6, CAT, PPARA, SIRT1, RELA	232	67	16792	7.56202	0.579288	0.00544447	0.00482898
GOTERM_BP_DIRECT	GO:0006629~lipid metabolic process	10	4.31034	0.000328008	SREBF1, MTTP, PDE3A, PPARG, CYP3A4, PPARA, LDLR, PLB1, PPARD, PTGS1	232	157	16792	4.61015	0.594444	0.00563968	0.00500211
GOTERM_BP_DIRECT	GO:0034612~response to tumor necrosis factor	5	2.15517	0.000351695	CASP8, CASP3, ADIPOQ, PTGS2, SELE	232	25	16792	14.4759	0.620037	0.00600939	0.00533003
GOTERM_BP_DIRECT	GO:0032870~cellular response to hormone stimulus	6	2.58621	0.000368098	NCOA1, NCOA2, JUN, STAT3, FOS, ADRA2A	232	45	16792	9.65057	0.636808	0.00625085	0.00554419
GOTERM_BP_DIRECT	GO:0050927~positive regulation of positive chemotaxis	4	1.72414	0.000390788	F7, KDR, F3, VEGFA	232	11	16792	26.3197	0.658794	0.00659545	0.00584983
GOTERM_BP_DIRECT	GO:0043123~positive regulation of I-kappaB kinase/NF-kappaB signaling	10	4.31034	0.000394696	IKBKB, IL1A, GJA1, CASP8, CHUK, PRKCB, ADIPOQ, HMOX1, TNF, RELA	232	161	16792	4.49561	0.662444	0.00662079	0.00587231
GOTERM_BP_DIRECT	GO:0098869~cellular oxidant detoxification	7	3.01724	0.000399527	GSTM2, GSTP1, GSR, CAT, PTGS2, DUOX2, PTGS1	232	70	16792	7.23793	0.666902	0.00666121	0.00590816
GOTERM_BP_DIRECT	GO:0045840~positive regulation of mitotic nuclear division	5	2.15517	0.000411183	NOS3, IL1B, CAV1, AKT1, EGFR	232	26	16792	13.9191	0.677417	0.00677343	0.0060077
GOTERM_BP_DIRECT	GO:0050999~regulation of nitric-oxide synthase activity	5	2.15517	0.000411183	IL1A, EGF, IL1B, INSR, IGF2	232	26	16792	13.9191	0.677417	0.00677343	0.0060077
GOTERM_BP_DIRECT	GO:0019221~cytokine-mediated signaling pathway	9	3.87931	0.000460491	IL1A, IL6, BAD, IL1B, STAT3, CCL2, F3, RELA, DUOX2	232	131	16792	4.97262	0.718353	0.00754054	0.00668808
GOTERM_BP_DIRECT	GO:0009408~response to heat	6	2.58621	0.000498924	IL6, NOS3, HSF1, CCL2, AKT1, SOD1	232	48	16792	9.04741	0.746625	0.00812154	0.0072034
GOTERM_BP_DIRECT	GO:0019430~removal of superoxide radicals	4	1.72414	0.000515771	CXCL10, CXCL11, ADRB1, OPRM1	232	12	16792	24.1264	0.758105	0.00824934	0.00731675
GOTERM_BP_DIRECT	GO:0043950~positive regulation of cAMP-mediated signaling	4	1.72414	0.000515771	CA2, HAS2, PTGS2, NFE2L2	232	12	16792	24.1264	0.758105	0.00824934	0.00731675
GOTERM_BP_DIRECT	GO:0071498~cellular response to fluid shear stress	4	1.72414	0.000515771	NQO1, NOS3, MPO, SOD1	232	12	16792	24.1264	0.758105	0.00824934	0.00731675
GOTERM_BP_DIRECT	GO:0000082~G1/S transition of mitotic cell cycle	8	3.44828	0.000519333	RB1, PPP3CA, CDKN1A, CCND1, CDKN2A, CDK4, CDK2, CDK1	232	102	16792	5.67681	0.760465	0.0082583	0.0073247
GOTERM_BP_DIRECT	GO:0007204~positive regulation of cytosolic calcium ion concentration	9	3.87931	0.000535547	GJA1, PTGER3, ADRA1D, OPRM1, ADRA1B, ESR1, ADRA1A, IL2, PIK3CG	232	134	16792	4.8613	0.77092	0.00846718	0.00750996
GOTERM_BP_DIRECT	GO:2000145~regulation of cell motility	5	2.15517	0.000551138	CCNB1, CDK1, BIRC5, PRKCA, NKX3-1	232	28	16792	12.9249	0.780543	0.00851387	0.00755138
GOTERM_BP_DIRECT	GO:0045931~positive regulation of mitotic cell cycle	5	2.15517	0.000551138	ERBB3, EGF, ERBB2, RAF1, EGFR	232	28	16792	12.9249	0.780543	0.00851387	0.00755138
GOTERM_BP_DIRECT	GO:0051881~regulation of mitochondrial membrane potential	5	2.15517	0.000551138	OPRD1, BCL2, BAX, BCL2L1, SOD1	232	28	16792	12.9249	0.780543	0.00851387	0.00755138
GOTERM_BP_DIRECT	GO:0070141~response to UV-A	3	1.2931	0.000560164	MAPK8, MAPK14, MAPK3	232	3	16792	72.3793	0.785928	0.00851387	0.00755138
GOTERM_BP_DIRECT	GO:0060559~positive regulation of calcidiol 1-monooxygenase activity	3	1.2931	0.000560164	IFNG, IL1B, TNF	232	3	16792	72.3793	0.785928	0.00851387	0.00755138
GOTERM_BP_DIRECT	GO:0031281~positive regulation of cyclase activity	3	1.2931	0.000560164	IL10, KCNMA1, SOD1	232	3	16792	72.3793	0.785928	0.00851387	0.00755138
GOTERM_BP_DIRECT	GO:0034465~response to carbon monoxide	3	1.2931	0.000560164	CCND1, AKT1, EGFR	232	3	16792	72.3793	0.785928	0.00851387	0.00755138
GOTERM_BP_DIRECT	GO:0006508~proteolysis	18	7.75862	0.000577177	PRSS1, MMP1, MMP2, CTRB1, MMP3, PLAT, PCOLCE, MMP9, BACE1, CASP9, DPP4, NPEPPS, CASP8, PLAU, CASP3, OLR1, LTA4H, CTSD	232	500	16792	2.60566	0.795722	0.00872426	0.00773798
GOTERM_BP_DIRECT	GO:0001649~osteoblast differentiation	8	3.44828	0.000583747	COL1A1, GJA1, FASN, IGFBP3, CAT, SPP1, AKT1, RUNX2	232	104	16792	5.56764	0.799383	0.00877535	0.0077833
GOTERM_BP_DIRECT	GO:0022617~extracellular matrix disassembly	7	3.01724	0.000622144	PRSS1, MMP1, MMP2, CTRB1, MMP3, SPP1, MMP9	232	76	16792	6.66652	0.819504	0.00930172	0.00825016
GOTERM_BP_DIRECT	GO:0071549~cellular response to dexamethasone stimulus	5	2.15517	0.000632474	CASP9, IL6, TGFB1, CCL2, EGFR	232	29	16792	12.4792	0.824565	0.00935449	0.00829697
GOTERM_BP_DIRECT	GO:0043542~endothelial cell migration	5	2.15517	0.000632474	DPP4, STAT1, NOS3, PTEN, CYP1B1	232	29	16792	12.4792	0.824565	0.00935449	0.00829697
GOTERM_BP_DIRECT	GO:0051926~negative regulation of calcium ion transport	4	1.72414	0.000663713	IL10, IL4, CAV1, OPRM1	232	13	16792	22.2706	0.839021	0.0097121	0.00861415
GOTERM_BP_DIRECT	GO:0045019~negative regulation of nitric oxide biosynthetic process	4	1.72414	0.000663713	NOS3, PTGS2, ADRA2A, ICAM1	232	13	16792	22.2706	0.839021	0.0097121	0.00861415
GOTERM_BP_DIRECT	GO:0014066~regulation of phosphatidylinositol 3-kinase signaling	7	3.01724	0.000714494	ERBB3, EGF, ERBB2, MAPK1, AKT1, EGFR, MAPK3	232	78	16792	6.49558	0.860023	0.0103776	0.00920446
GOTERM_BP_DIRECT	GO:0045776~negative regulation of blood pressure	5	2.15517	0.000721966	INSR, ADIPOQ, AKT1, MAPK14, NFE2L2	232	30	16792	12.0632	0.862873	0.0103776	0.00920446
GOTERM_BP_DIRECT	GO:0046326~positive regulation of glucose import	5	2.15517	0.000721966	NOS2, NOS3, ADIPOQ, ABAT, PPARA	232	30	16792	12.0632	0.862873	0.0103776	0.00920446
GOTERM_BP_DIRECT	GO:0034097~response to cytokine	6	2.58621	0.000724285	IL4, JUN, STAT1, BCL2, FOS, BCL2L1	232	52	16792	8.35146	0.863745	0.0103776	0.00920446
GOTERM_BP_DIRECT	GO:0042981~regulation of apoptotic process	11	4.74138	0.000752614	CASP9, TGFB1, CASP8, STAT1, IGFBP3, BAX, BIRC5, RAF1, ESR1, TP53, BCL2L1	232	213	16792	3.7379	0.873968	0.0107277	0.00951491
GOTERM_BP_DIRECT	GO:0045727~positive regulation of translation	6	2.58621	0.000790883	IL6, EIF6, CDK4, ERBB2, MAPK1, MAPK3	232	53	16792	8.19388	0.886571	0.011215	0.00994718
GOTERM_BP_DIRECT	GO:0006979~response to oxidative stress	8	3.44828	0.000815834	HMOX1, AKT1, PTGS2, MPO, SIRT1, EGFR, DUOX2, PTGS1	232	110	16792	5.26395	0.894102	0.0112761	0.0100013
GOTERM_BP_DIRECT	GO:0071479~cellular response to ionizing radiation	5	2.15517	0.000820056	IFNG, MYC, GSTP1, BAX, TP53	232	31	16792	11.6741	0.895325	0.0112761	0.0100013
GOTERM_BP_DIRECT	GO:0048147~negative regulation of fibroblast proliferation	5	2.15517	0.000820056	CDKN1A, TGFB1, MAPK14, SIRT1, TP53	232	31	16792	11.6741	0.895325	0.0112761	0.0100013
GOTERM_BP_DIRECT	GO:0045821~positive regulation of glycolytic process	4	1.72414	0.000836177	NFKBIA, PON1, ADIPOQ, SIRT1	232	14	16792	20.6798	0.89987	0.0112761	0.0100013
GOTERM_BP_DIRECT	GO:1902176~negative regulation of oxidative stress-induced intrinsic apoptotic signaling pathway	4	1.72414	0.000836177	IL10, GSK3B, IL6, RELA	232	14	16792	20.6798	0.89987	0.0112761	0.0100013
GOTERM_BP_DIRECT	GO:0035729~cellular response to hepatocyte growth factor stimulus	4	1.72414	0.000836177	MYC, INSR, HTR2A, HIF1A	232	14	16792	20.6798	0.89987	0.0112761	0.0100013
GOTERM_BP_DIRECT	GO:0014912~negative regulation of smooth muscle cell migration	4	1.72414	0.000836177	IGFBP3, ADIPOQ, SERPINE1, PPARD	232	14	16792	20.6798	0.89987	0.0112761	0.0100013
GOTERM_BP_DIRECT	GO:0019395~fatty acid oxidation	4	1.72414	0.000836177	MMP1, MMP3, BAX, TP53	232	14	16792	20.6798	0.89987	0.0112761	0.0100013
GOTERM_BP_DIRECT	GO:0010875~positive regulation of cholesterol efflux	4	1.72414	0.000836177	POR, ADIPOQ, PPARG, MAPK14	232	14	16792	20.6798	0.89987	0.0112761	0.0100013
GOTERM_BP_DIRECT	GO:0032461~positive regulation of protein oligomerization	4	1.72414	0.000836177	HSPB1, AKT1, SIRT1, NFE2L2	232	14	16792	20.6798	0.89987	0.0112761	0.0100013
GOTERM_BP_DIRECT	GO:0043085~positive regulation of catalytic activity	7	3.01724	0.000872496	NCF1, CAV1, IGFBP3, BCL2, IGF2, PIK3CG, SOD1	232	81	16792	6.255	0.909399	0.0117085	0.0103848
GOTERM_BP_DIRECT	GO:0016032~viral process	13	5.60345	0.000922475	RB1, VCAM1, MMP1, STAT3, SIRT1, NFKBIA, CCNA2, KDR, BAX, MAPK1, TOP1, TP53, MAPK3	232	299	16792	3.14693	0.921047	0.0123191	0.0109264
GOTERM_BP_DIRECT	GO:0050873~brown fat cell differentiation	5	2.15517	0.000927184	ADIPOQ, ADRB1, SLC2A4, ADRB2, PTGS2	232	32	16792	11.3093	0.922064	0.0123221	0.0109291
GOTERM_BP_DIRECT	GO:0007507~heart development	10	4.31034	0.000991683	GJA1, TGFB1, ERBB3, ERBB2, PTEN, PPARG, RAF1, PPARA, NKX3-1, PPARD	232	183	16792	3.95515	0.934746	0.013116	0.0116332
GOTERM_BP_DIRECT	GO:0050680~negative regulation of epithelial cell proliferation	6	2.58621	0.0010182	RB1, AR, TGFB1, PTEN, NKX3-1, PPARD	232	56	16792	7.75493	0.939341	0.0132387	0.0117421
GOTERM_BP_DIRECT	GO:0001570~vasculogenesis	6	2.58621	0.0010182	TGFB1, RASA1, CAV1, KDR, HAS2, VEGFA	232	56	16792	7.75493	0.939341	0.0132387	0.0117421
GOTERM_BP_DIRECT	GO:0042953~lipoprotein transport	4	1.72414	0.00103465	PTPN1, STAT3, MAPK1, MAPK3	232	15	16792	19.3011	0.942028	0.0132387	0.0117421
GOTERM_BP_DIRECT	GO:0046688~response to copper ion	4	1.72414	0.00103465	IFNG, IL1B, TNF, ADRA2A	232	15	16792	19.3011	0.942028	0.0132387	0.0117421
GOTERM_BP_DIRECT	GO:0060397~JAK-STAT cascade involved in growth hormone signaling pathway	4	1.72414	0.00103465	IL1A, CDK1, ICAM1, SOD1	232	15	16792	19.3011	0.942028	0.0132387	0.0117421
GOTERM_BP_DIRECT	GO:0051044~positive regulation of membrane protein ectodomain proteolysis	4	1.72414	0.00103465	PRKCB, MTTP, PPARG, APOB	232	15	16792	19.3011	0.942028	0.0132387	0.0117421
GOTERM_BP_DIRECT	GO:0032270~positive regulation of cellular protein metabolic process	4	1.72414	0.00103465	NFKBIA, TGFB1, ADIPOQ, AKT1	232	15	16792	19.3011	0.942028	0.0132387	0.0117421
GOTERM_BP_DIRECT	GO:0051402~neuron apoptotic process	5	2.15517	0.00104379	RB1, ERBB3, BCL2, BAX, BCL2L1	232	33	16792	10.9666	0.943469	0.0132939	0.011791
GOTERM_BP_DIRECT	GO:0032091~negative regulation of protein binding	6	2.58621	0.00110377	GSK3B, MAPK8, SLPI, CAV1, BAX, PPARA	232	57	16792	7.61887	0.952076	0.0137569	0.0122017
GOTERM_BP_DIRECT	GO:0002248~connective tissue replacement involved in inflammatory response wound healing	3	1.2931	0.00111015	CDKN1A, MAPK14, SIRT1	232	4	16792	54.2845	0.952911	0.0137569	0.0122017
GOTERM_BP_DIRECT	GO:0071677~positive regulation of mononuclear cell migration	3	1.2931	0.00111015	IL1A, TGFB1, HIF1A	232	4	16792	54.2845	0.952911	0.0137569	0.0122017
GOTERM_BP_DIRECT	GO:0001994~norepinephrine-epinephrine vasoconstriction involved in regulation of systemic arterial blood pressure	3	1.2931	0.00111015	IL4, TGFB1, TNF	232	4	16792	54.2845	0.952911	0.0137569	0.0122017
GOTERM_BP_DIRECT	GO:0090400~stress-induced premature senescence	3	1.2931	0.00111015	ADRA1D, ADRA1B, ADRA1A	232	4	16792	54.2845	0.952911	0.0137569	0.0122017
GOTERM_BP_DIRECT	GO:0000320~re-entry into mitotic cell cycle	3	1.2931	0.00111015	GSK3B, CCND1, MYC	232	4	16792	54.2845	0.952911	0.0137569	0.0122017
GOTERM_BP_DIRECT	GO:0006928~movement of cell or subcellular component	7	3.01724	0.00119415	CXCL8, IFNG, STAT3, HSPB1, MAPK14, PTGS2, ADRA2A	232	86	16792	5.89134	0.962637	0.0147314	0.013066
GOTERM_BP_DIRECT	GO:0044130~negative regulation of growth of symbiont in host	4	1.72414	0.00126055	CHRM2, CAV1, ADRB2, ADRA2A	232	16	16792	18.0948	0.968882	0.0153441	0.0136095
GOTERM_BP_DIRECT	GO:0006940~regulation of smooth muscle contraction	4	1.72414	0.00126055	IL10, IFNG, MPO, TNF	232	16	16792	18.0948	0.968882	0.0153441	0.0136095
GOTERM_BP_DIRECT	GO:0030949~positive regulation of vascular endothelial growth factor receptor signaling pathway	4	1.72414	0.00126055	PRKCB, IL1B, HIF1A, VEGFA	232	16	16792	18.0948	0.968882	0.0153441	0.0136095
GOTERM_BP_DIRECT	GO:0009612~response to mechanical stimulus	6	2.58621	0.00129075	CCNB1, JUN, STAT1, CCL2, PPARG, MPO	232	59	16792	7.36061	0.971366	0.0156425	0.0138741
GOTERM_BP_DIRECT	GO:0042102~positive regulation of T cell proliferation	6	2.58621	0.00139255	IL4, IL6, VCAM1, CD40LG, IFNG, IL1B	232	60	16792	7.23793	0.978368	0.0168022	0.0149027
GOTERM_BP_DIRECT	GO:0043407~negative regulation of MAP kinase activity	5	2.15517	0.00145493	PTPN1, IL1B, GSTP1, ADIPOQ, HMGCR	232	36	16792	10.0527	0.981783	0.0174782	0.0155023
GOTERM_BP_DIRECT	GO:0001933~negative regulation of protein phosphorylation	6	2.58621	0.00150014	CCNB1, TGFB1, IGFBP3, PTEN, XDH, IL2	232	61	16792	7.11928	0.983917	0.017943	0.0159145
GOTERM_BP_DIRECT	GO:1901216~positive regulation of neuron death	4	1.72414	0.00151521	GSK3B, PARP1, BAD, ELK1	232	17	16792	17.0304	0.984571	0.0180447	0.0160048
GOTERM_BP_DIRECT	GO:0007613~memory	6	2.58621	0.00161373	CHRNA7, PTEN, DRD1, HTR2A, PTGS2, SLC6A4	232	62	16792	7.00445	0.988239	0.0190548	0.0169007
GOTERM_BP_DIRECT	GO:0034605~cellular response to heat	5	2.15517	0.00161388	IL1A, CXCL10, CDKN1A, HSF1, HMOX1	232	37	16792	9.78099	0.988244	0.0190548	0.0169007
GOTERM_BP_DIRECT	GO:0038128~ERBB2 signaling pathway	5	2.15517	0.00178451	ERBB3, EGF, ERBB2, AKT1, EGFR	232	38	16792	9.52359	0.992654	0.0205035	0.0181856
GOTERM_BP_DIRECT	GO:0032720~negative regulation of tumor necrosis factor production	5	2.15517	0.00178451	IL10, CHRNA7, GSTP1, HSF1, ADIPOQ	232	38	16792	9.52359	0.992654	0.0205035	0.0181856
GOTERM_BP_DIRECT	GO:0033280~response to vitamin D	4	1.72414	0.0017999	CXCL10, TGFB1, SPP1, PTGS2	232	18	16792	16.0843	0.992959	0.0205035	0.0181856
GOTERM_BP_DIRECT	GO:0036120~cellular response to platelet-derived growth factor stimulus	4	1.72414	0.0017999	CXCL10, F7, IL6, CXCL11	232	18	16792	16.0843	0.992959	0.0205035	0.0181856
GOTERM_BP_DIRECT	GO:0051412~response to corticosterone	4	1.72414	0.0017999	CCNA2, MYC, CCL2, HAS2	232	18	16792	16.0843	0.992959	0.0205035	0.0181856
GOTERM_BP_DIRECT	GO:0010039~response to iron ion	4	1.72414	0.0017999	CCND1, BCL2, ABAT, SLC6A3	232	18	16792	16.0843	0.992959	0.0205035	0.0181856
GOTERM_BP_DIRECT	GO:0002690~positive regulation of leukocyte chemotaxis	4	1.72414	0.0017999	CDKN1A, MAOB, CCND1, FOS	232	18	16792	16.0843	0.992959	0.0205035	0.0181856
GOTERM_BP_DIRECT	GO:0033189~response to vitamin A	4	1.72414	0.0017999	CAT, CYP1A1, PPARG, PPARD	232	18	16792	16.0843	0.992959	0.0205035	0.0181856
GOTERM_BP_DIRECT	GO:0034349~glial cell apoptotic process	3	1.2931	0.00183347	MAOB, MAOA, SLC6A3	232	5	16792	43.4276	0.993581	0.0205035	0.0181856
GOTERM_BP_DIRECT	GO:0042420~dopamine catabolic process	3	1.2931	0.00183347	KDR, HSPB1, VEGFA	232	5	16792	43.4276	0.993581	0.0205035	0.0181856
GOTERM_BP_DIRECT	GO:0007598~blood coagulation, extrinsic pathway	3	1.2931	0.00183347	F7, F10, F3	232	5	16792	43.4276	0.993581	0.0205035	0.0181856
GOTERM_BP_DIRECT	GO:0038033~positive regulation of endothelial cell chemotaxis by VEGF-activated vascular endothelial growth factor receptor signaling pathway	3	1.2931	0.00183347	CAV1, MAPK1, MAPK3	232	5	16792	43.4276	0.993581	0.0205035	0.0181856
GOTERM_BP_DIRECT	GO:0072584~caveolin-mediated endocytosis	3	1.2931	0.00183347	RB1, CASP9, CASP3	232	5	16792	43.4276	0.993581	0.0205035	0.0181856
GOTERM_BP_DIRECT	GO:0030574~collagen catabolic process	6	2.58621	0.00185968	COL1A1, MMP1, MMP2, MMP3, CTSD, MMP9	232	64	16792	6.78556	0.994028	0.0207125	0.018371
GOTERM_BP_DIRECT	GO:0008584~male gonad development	7	3.01724	0.00188858	NCOA1, INSR, BCL2, AKR1C3, ESR1, BCL2L1, NKX3-1	232	94	16792	5.38995	0.994486	0.0209496	0.0185812
GOTERM_BP_DIRECT	GO:0014068~positive regulation of phosphatidylinositol 3-kinase signaling	6	2.58621	0.00199245	NOS3, HMOX1, PPARG, PTGS2, SOD1, PTGS1	232	65	16792	6.68117	0.995859	0.021925	0.0194463
GOTERM_BP_DIRECT	GO:0008217~regulation of blood pressure	6	2.58621	0.00199245	ERBB3, CAT, KDR, SIRT1, NKX3-1, PPARD	232	65	16792	6.68117	0.995859	0.021925	0.0194463
GOTERM_BP_DIRECT	GO:0001659~temperature homeostasis	4	1.72414	0.00211582	IL10, IL4, IL6, IFNG	232	19	16792	15.2377	0.997052	0.0230064	0.0204055
GOTERM_BP_DIRECT	GO:0042832~defense response to protozoan	4	1.72414	0.00211582	STAT3, ADRB1, DRD1, HTR2A	232	19	16792	15.2377	0.997052	0.0230064	0.0204055
GOTERM_BP_DIRECT	GO:0045672~positive regulation of osteoclast differentiation	4	1.72414	0.00211582	IFNG, CA2, FOS, TNF	232	19	16792	15.2377	0.997052	0.0230064	0.0204055
GOTERM_BP_DIRECT	GO:0007190~activation of adenylate cyclase activity	5	2.15517	0.00216254	RB1, CDKN1A, MYC, BIRC5, SIRT1	232	40	16792	9.04741	0.997409	0.02333	0.0206926
GOTERM_BP_DIRECT	GO:0007346~regulation of mitotic cell cycle	5	2.15517	0.00216254	ADRB1, PRKCA, DRD1, ADRB2, RAF1	232	40	16792	9.04741	0.997409	0.02333	0.0206926
GOTERM_BP_DIRECT	GO:0050796~regulation of insulin secretion	6	2.58621	0.00227858	IFNG, NOS2, IL1B, PRKCA, TNF, ADRA2A	232	67	16792	6.48173	0.998118	0.0244858	0.0217177
GOTERM_BP_DIRECT	GO:0030521~androgen receptor signaling pathway	5	2.15517	0.00237081	RB1, NCOA1, AR, NR1I3, NKX3-1	232	41	16792	8.82675	0.998541	0.0253778	0.0225089
GOTERM_BP_DIRECT	GO:0071157~negative regulation of cell cycle arrest	4	1.72414	0.00246411	RASSF1, CCND1, CDK4, CHEK2	232	20	16792	14.4759	0.998872	0.0262743	0.023304
GOTERM_BP_DIRECT	GO:0034220~ion transmembrane transport	10	4.31034	0.00255583	GABRA2, GABRA1, GRIA2, GJA1, GABRA6, GABRA5, CHRNA7, GABRA3, HTR3A, RAF1	232	210	16792	3.44663	0.999124	0.027147	0.0240781
GOTERM_BP_DIRECT	GO:0010468~regulation of gene expression	7	3.01724	0.00258331	IL10, CDK4, MYC, CYP1A2, BCL2, AHR, HIF1A	232	100	16792	5.06655	0.999188	0.0272317	0.0241532
GOTERM_BP_DIRECT	GO:0045740~positive regulation of DNA replication	5	2.15517	0.00259247	IL6, JUN, INSR, CDK1, EGFR	232	42	16792	8.61658	0.999208	0.0272317	0.0241532
GOTERM_BP_DIRECT	GO:0043154~negative regulation of cysteine-type endopeptidase activity involved in apoptotic process	6	2.58621	0.0025935	IL6, POR, BIRC5, AKT1, RAF1, VEGFA	232	69	16792	6.29385	0.99921	0.0272317	0.0241532
GOTERM_BP_DIRECT	GO:0046483~heterocycle metabolic process	3	1.2931	0.00272528	CASP9, CASP8, CASP3	232	6	16792	36.1897	0.999451	0.0280795	0.0249051
GOTERM_BP_DIRECT	GO:1903799~negative regulation of production of miRNAs involved in gene silencing by miRNA	3	1.2931	0.00272528	IL6, TNF, NKX3-1	232	6	16792	36.1897	0.999451	0.0280795	0.0249051
GOTERM_BP_DIRECT	GO:0060664~epithelial cell proliferation involved in salivary gland morphogenesis	3	1.2931	0.00272528	UGT1A1, CYP1A2, CYP3A4	232	6	16792	36.1897	0.999451	0.0280795	0.0249051
GOTERM_BP_DIRECT	GO:0032025~response to cobalt ion	3	1.2931	0.00272528	PPP3CA, TGFB1, ESR1	232	6	16792	36.1897	0.999451	0.0280795	0.0249051
GOTERM_BP_DIRECT	GO:0045084~positive regulation of interleukin-12 biosynthetic process	3	1.2931	0.00272528	IFNG, IRF1, RELA	232	6	16792	36.1897	0.999451	0.0280795	0.0249051
GOTERM_BP_DIRECT	GO:0048538~thymus development	5	2.15517	0.00282795	BCL2, MAPK1, RAF1, SOD1, MAPK3	232	43	16792	8.4162	0.999586	0.0290287	0.025747
GOTERM_BP_DIRECT	GO:0071480~cellular response to gamma radiation	4	1.72414	0.00284584	CDKN1A, CHEK2, ELK1, BCL2L1	232	21	16792	13.7865	0.999606	0.0291038	0.0258136
GOTERM_BP_DIRECT	GO:0097190~apoptotic signaling pathway	6	2.58621	0.00293884	CASP8, CASP3, CAV1, BAX, PRKCA, PPARD	232	71	16792	6.11656	0.999695	0.0299435	0.0265584
GOTERM_BP_DIRECT	GO:0006879~cellular iron ion homeostasis	5	2.15517	0.00307766	MYC, HMOX1, HIF1A, ABCG2, SOD1	232	44	16792	8.22492	0.999792	0.0311273	0.0276084
GOTERM_BP_DIRECT	GO:0034644~cellular response to UV	5	2.15517	0.00307766	CASP9, MYC, BAX, PTGS2, TP53	232	44	16792	8.22492	0.999792	0.0311273	0.0276084
GOTERM_BP_DIRECT	GO:0048010~vascular endothelial growth factor receptor signaling pathway	6	2.58621	0.00312343	NCF1, KDR, HSPB1, CCL2, MAPK14, VEGFA	232	72	16792	6.03161	0.999817	0.0314745	0.0279164
GOTERM_BP_DIRECT	GO:0046427~positive regulation of JAK-STAT cascade	4	1.72414	0.00326202	GSK3B, TGFB1, TNF, VEGFA	232	22	16792	13.1599	0.999875	0.0325138	0.0288381
GOTERM_BP_DIRECT	GO:0031334~positive regulation of protein complex assembly	4	1.72414	0.00326202	IL10, IL6, AKR1B1, CYP1B1	232	22	16792	13.1599	0.999875	0.0325138	0.0288381
GOTERM_BP_DIRECT	GO:0010906~regulation of glucose metabolic process	4	1.72414	0.00326202	NCOA2, IGFBP3, ADIPOQ, SIRT1	232	22	16792	13.1599	0.999875	0.0325138	0.0288381
GOTERM_BP_DIRECT	GO:0071363~cellular response to growth factor stimulus	5	2.15517	0.00334201	OPRD1, INSR, ERBB2, CAT, HTR3A	232	45	16792	8.04215	0.9999	0.0331908	0.0294386
GOTERM_BP_DIRECT	GO:0048015~phosphatidylinositol-mediated signaling	7	3.01724	0.00345437	ERBB3, EGF, ERBB2, PTEN, AKT1, EGFR, PIK3CG	232	106	16792	4.77977	0.999927	0.0341833	0.0303189
GOTERM_BP_DIRECT	GO:0007187~G-protein coupled receptor signaling pathway, coupled to cyclic nucleotide second messenger	5	2.15517	0.0036214	CHRM2, OPRD1, CCL2, DRD1, OPRM1	232	46	16792	7.86732	0.999954	0.0357077	0.031671
GOTERM_BP_DIRECT	GO:0045662~negative regulation of myoblast differentiation	4	1.72414	0.00371359	SREBF1, CCNB1, E2F1, LDLR	232	23	16792	12.5877	0.999964	0.0362272	0.0321317
GOTERM_BP_DIRECT	GO:0071398~cellular response to fatty acid	4	1.72414	0.00371359	KDR, HMOX1, HIF1A, SIRT1	232	23	16792	12.5877	0.999964	0.0362272	0.0321317
GOTERM_BP_DIRECT	GO:0016239~positive regulation of macroautophagy	4	1.72414	0.00371359	CXCL10, TGFB1, TNF, PPARD	232	23	16792	12.5877	0.999964	0.0362272	0.0321317
GOTERM_BP_DIRECT	GO:1903140~regulation of establishment of endothelial barrier	3	1.2931	0.00378085	IKBKB, IL1B, TNF	232	7	16792	31.0197	0.99997	0.0363675	0.0322562
GOTERM_BP_DIRECT	GO:0015872~dopamine transport	3	1.2931	0.00378085	IL1A, IL1B, ADIPOQ	232	7	16792	31.0197	0.99997	0.0363675	0.0322562
GOTERM_BP_DIRECT	GO:0044321~response to leptin	3	1.2931	0.00378085	CCND1, STAT3, SIRT1	232	7	16792	31.0197	0.99997	0.0363675	0.0322562
GOTERM_BP_DIRECT	GO:0071639~positive regulation of monocyte chemotactic protein-1 production	3	1.2931	0.00378085	CHRM5, DRD1, SLC6A3	232	7	16792	31.0197	0.99997	0.0363675	0.0322562
GOTERM_BP_DIRECT	GO:0071230~cellular response to amino acid stimulus	5	2.15517	0.00391623	DPP4, PPP3CA, CASP8, CHRNA7, PIK3CG	232	47	16792	7.69993	0.999979	0.0372787	0.0330643
GOTERM_BP_DIRECT	GO:0045600~positive regulation of fat cell differentiation	5	2.15517	0.00391623	COL1A1, MMP2, TNF, EGFR, BCL2L1	232	47	16792	7.69993	0.999979	0.0372787	0.0330643
GOTERM_BP_DIRECT	GO:0042110~T cell activation	5	2.15517	0.00391623	SULT1E1, AKT1, PPARG, HTR2A, PPARD	232	47	16792	7.69993	0.999979	0.0372787	0.0330643
GOTERM_BP_DIRECT	GO:0045454~cell redox homeostasis	6	2.58621	0.00417368	IL6, NCF1, NOS2, NOS3, GSR, NFE2L2	232	77	16792	5.63995	0.99999	0.0395924	0.0351165
GOTERM_BP_DIRECT	GO:0001701~in utero embryonic development	9	3.87931	0.0044184	AR, GJA1, CCNB1, RXRA, NOS3, MYC, APOB, BCL2L1, VEGFA	232	187	16792	3.4835	0.999995	0.041674	0.0369628
GOTERM_BP_DIRECT	GO:0050852~T cell receptor signaling pathway	8	3.44828	0.00442342	NFKBIA, IKBKB, IFNG, CHUK, PSMD3, PTEN, MAPK1, RELA	232	148	16792	3.9124	0.999995	0.041674	0.0369628
GOTERM_BP_DIRECT	GO:0042752~regulation of circadian rhythm	5	2.15517	0.00455377	TOP2A, MAPK10, MAPK8, PPARG, PPARA	232	49	16792	7.38564	0.999996	0.0427557	0.0379222
GOTERM_BP_DIRECT	GO:0030878~thyroid gland development	4	1.72414	0.0047264	MAPK1, RAF1, DUOX2, MAPK3	232	25	16792	11.5807	0.999998	0.0433525	0.0384515
GOTERM_BP_DIRECT	GO:2000134~negative regulation of G1/S transition of mitotic cell cycle	4	1.72414	0.0047264	RB1, CDKN1A, PTEN, BCL2	232	25	16792	11.5807	0.999998	0.0433525	0.0384515
GOTERM_BP_DIRECT	GO:0007159~leukocyte cell-cell adhesion	4	1.72414	0.0047264	VCAM1, CD40LG, SELE, ICAM1	232	25	16792	11.5807	0.999998	0.0433525	0.0384515
GOTERM_BP_DIRECT	GO:0051899~membrane depolarization	4	1.72414	0.0047264	JUN, CAV1, ADIPOQ, SCN5A	232	25	16792	11.5807	0.999998	0.0433525	0.0384515
GOTERM_BP_DIRECT	GO:0001503~ossification	6	2.58621	0.00491296	BCL2, SPP1, IGF2, MMP9, EGFR, RUNX2	232	80	16792	5.42845	0.999999	0.0433525	0.0384515
GOTERM_BP_DIRECT	GO:0044598~doxorubicin metabolic process	3	1.2931	0.00499555	SLC6A2, SLC6A3, SLC6A4	232	8	16792	27.1422	0.999999	0.0433525	0.0384515
GOTERM_BP_DIRECT	GO:0048304~positive regulation of isotype switching to IgG isotypes	3	1.2931	0.00499555	CCNB1, IL1B, MAPK3	232	8	16792	27.1422	0.999999	0.0433525	0.0384515
GOTERM_BP_DIRECT	GO:0071316~cellular response to nicotine	3	1.2931	0.00499555	IL6, PPARG, PPARD	232	8	16792	27.1422	0.999999	0.0433525	0.0384515
GOTERM_BP_DIRECT	GO:0060736~prostate gland growth	3	1.2931	0.00499555	AR, PTEN, CYP19A1	232	8	16792	27.1422	0.999999	0.0433525	0.0384515
GOTERM_BP_DIRECT	GO:0034379~very-low-density lipoprotein particle assembly	3	1.2931	0.00499555	CASP8, RAF1, TNF	232	8	16792	27.1422	0.999999	0.0433525	0.0384515
GOTERM_BP_DIRECT	GO:0032872~regulation of stress-activated MAPK cascade	3	1.2931	0.00499555	GSTP1, MAPK1, MAPK3	232	8	16792	27.1422	0.999999	0.0433525	0.0384515
GOTERM_BP_DIRECT	GO:0002674~negative regulation of acute inflammatory response	3	1.2931	0.00499555	POR, MYC, CYP1A1	232	8	16792	27.1422	0.999999	0.0433525	0.0384515
GOTERM_BP_DIRECT	GO:0071550~death-inducing signaling complex assembly	3	1.2931	0.00499555	IL10, GSTP1, HMOX1	232	8	16792	27.1422	0.999999	0.0433525	0.0384515
GOTERM_BP_DIRECT	GO:0031659~positive regulation of cyclin-dependent protein serine/threonine kinase activity involved in G1/S transition of mitotic cell cycle	3	1.2931	0.00499555	IL4, GSTP1, PPARG	232	8	16792	27.1422	0.999999	0.0433525	0.0384515
GOTERM_BP_DIRECT	GO:0042135~neurotransmitter catabolic process	3	1.2931	0.00499555	MAOB, MAOA, ABAT	232	8	16792	27.1422	0.999999	0.0433525	0.0384515
GOTERM_BP_DIRECT	GO:0035234~ectopic germ cell programmed cell death	3	1.2931	0.00499555	PIM1, AKT1, EGFR	232	8	16792	27.1422	0.999999	0.0433525	0.0384515
GOTERM_BP_DIRECT	GO:0006975~DNA damage induced protein phosphorylation	3	1.2931	0.00499555	AKR1C1, AKR1C3, AKR1B1	232	8	16792	27.1422	0.999999	0.0433525	0.0384515
GOTERM_BP_DIRECT	GO:0032966~negative regulation of collagen biosynthetic process	3	1.2931	0.00499555	CXCL10, CXCL11, PIK3CG	232	8	16792	27.1422	0.999999	0.0433525	0.0384515
GOTERM_BP_DIRECT	GO:0010818~T cell chemotaxis	3	1.2931	0.00499555	SOAT1, SOAT2, APOB	232	8	16792	27.1422	0.999999	0.0433525	0.0384515
GOTERM_BP_DIRECT	GO:1904706~negative regulation of vascular smooth muscle cell proliferation	3	1.2931	0.00499555	BAD, TNF, RELA	232	8	16792	27.1422	0.999999	0.0433525	0.0384515
GOTERM_BP_DIRECT	GO:0044597~daunorubicin metabolic process	3	1.2931	0.00499555	AKR1C1, AKR1C3, AKR1B1	232	8	16792	27.1422	0.999999	0.0433525	0.0384515
GOTERM_BP_DIRECT	GO:0015844~monoamine transport	3	1.2931	0.00499555	IL4, IFNG, IL2	232	8	16792	27.1422	0.999999	0.0433525	0.0384515
GOTERM_BP_DIRECT	GO:0033129~positive regulation of histone phosphorylation	3	1.2931	0.00499555	IL1A, IL1B, BAX	232	8	16792	27.1422	0.999999	0.0433525	0.0384515
GOTERM_BP_DIRECT	GO:0009812~flavonoid metabolic process	3	1.2931	0.00499555	CHEK2, CHEK1, MAPK3	232	8	16792	27.1422	0.999999	0.0433525	0.0384515
GOTERM_BP_DIRECT	GO:0032757~positive regulation of interleukin-8 production	4	1.72414	0.00528926	IL1B, ADIPOQ, SERPINE1, TNF	232	26	16792	11.1353	1	0.0454711	0.0403306
GOTERM_BP_DIRECT	GO:0045930~negative regulation of mitotic cell cycle	4	1.72414	0.00528926	IL10, TGFB1, EGFR, NKX3-1	232	26	16792	11.1353	1	0.0454711	0.0403306
GOTERM_BP_DIRECT	GO:0007202~activation of phospholipase C activity	4	1.72414	0.00528926	HTR2A, SELE, ADRA1A, EGFR	232	26	16792	11.1353	1	0.0454711	0.0403306
GOTERM_BP_DIRECT	GO:0019233~sensory perception of pain	5	2.15517	0.00563549	OPRD1, MAPK1, OPRM1, PTGS2, MAPK3	232	52	16792	6.95955	1	0.0482967	0.0428367
GOTERM_BP_DIRECT	GO:0010800~positive regulation of peptidyl-threonine phosphorylation	4	1.72414	0.00589073	E2F1, BAX, E2F2, TP53	232	27	16792	10.7229	1	0.0495578	0.0439553
GOTERM_BP_DIRECT	GO:0072332~intrinsic apoptotic signaling pathway by p53 class mediator	4	1.72414	0.00589073	GSK3B, TGFB1, EGF, MAPK1	232	27	16792	10.7229	1	0.0495578	0.0439553
GOTERM_BP_DIRECT	GO:0015721~bile acid and bile salt transport	4	1.72414	0.00589073	UGT1A1, CYP1A2, CYP1A1, CYP3A4	232	27	16792	10.7229	1	0.0495578	0.0439553
GOTERM_BP_DIRECT	GO:0017144~drug metabolic process	4	1.72414	0.00589073	NCOA1, NCOA2, RXRA, AKR1C1	232	27	16792	10.7229	1	0.0495578	0.0439553
GOTERM_BP_DIRECT	GO:0051281~positive regulation of release of sequestered calcium ion into cytosol	4	1.72414	0.00589073	CXCL10, CXCL11, BAX, DRD1	232	27	16792	10.7229	1	0.0495578	0.0439553
GOTERM_BP_DIRECT	GO:0014065~phosphatidylinositol 3-kinase signaling	4	1.72414	0.00589073	ERBB3, ERBB2, HTR2A, PIK3CG	232	27	16792	10.7229	1	0.0495578	0.0439553
GOTERM_BP_DIRECT	GO:1901522~positive regulation of transcription from RNA polymerase II promoter involved in cellular response to chemical stimulus	3	1.2931	0.00636483	CYP1A2, CYP1A1, CYP1B1	232	9	16792	24.1264	1	0.0525816	0.0466372
GOTERM_BP_DIRECT	GO:0008635~activation of cysteine-type endopeptidase activity involved in apoptotic process by cytochrome c	3	1.2931	0.00636483	SOAT2, AKR1C1, LDLR	232	9	16792	24.1264	1	0.0525816	0.0466372
GOTERM_BP_DIRECT	GO:0002237~response to molecule of bacterial origin	3	1.2931	0.00636483	GJA1, NOS3, AKT1	232	9	16792	24.1264	1	0.0525816	0.0466372
GOTERM_BP_DIRECT	GO:0030299~intestinal cholesterol absorption	3	1.2931	0.00636483	RXRA, RXRG, RUNX2	232	9	16792	24.1264	1	0.0525816	0.0466372
GOTERM_BP_DIRECT	GO:0097267~omega-hydroxylase P450 pathway	3	1.2931	0.00636483	IL10, CXCL8, CXCL2	232	9	16792	24.1264	1	0.0525816	0.0466372
GOTERM_BP_DIRECT	GO:0034405~response to fluid shear stress	3	1.2931	0.00636483	CASP9, CASP3, BAX	232	9	16792	24.1264	1	0.0525816	0.0466372
GOTERM_BP_DIRECT	GO:0043392~negative regulation of DNA binding	4	1.72414	0.00653148	BAD, BAX, TP53, MMP9	232	28	16792	10.3399	1	0.0536361	0.0475725
GOTERM_BP_DIRECT	GO:0090200~positive regulation of release of cytochrome c from mitochondria	4	1.72414	0.00653148	NFKBIA, JUN, E2F1, HMOX1	232	28	16792	10.3399	1	0.0536361	0.0475725
GOTERM_BP_DIRECT	GO:0046627~negative regulation of insulin receptor signaling pathway	4	1.72414	0.00721213	IL4, CASP8, PRKCB, CHRNA7	232	29	16792	9.98335	1	0.0585268	0.0519103
GOTERM_BP_DIRECT	GO:0001937~negative regulation of endothelial cell proliferation	4	1.72414	0.00721213	DPP4, GABRA5, BCL2, DRD1	232	29	16792	9.98335	1	0.0585268	0.0519103
GOTERM_BP_DIRECT	GO:0001662~behavioral fear response	4	1.72414	0.00721213	GJA1, STAT1, CAV1, XDH	232	29	16792	9.98335	1	0.0585268	0.0519103
GOTERM_BP_DIRECT	GO:0042113~B cell activation	4	1.72414	0.00721213	PTPN1, PRKCB, IL1B, RELA	232	29	16792	9.98335	1	0.0585268	0.0519103
GOTERM_BP_DIRECT	GO:0016049~cell growth	5	2.15517	0.00732703	GSTM2, GSTM1, GSTP1, GSR, SOD1	232	56	16792	6.46244	1	0.0591104	0.052428
GOTERM_BP_DIRECT	GO:0006749~glutathione metabolic process	5	2.15517	0.00732703	AR, IL6, TGFB1, BCL2, ADRA1A	232	56	16792	6.46244	1	0.0591104	0.052428
GOTERM_BP_DIRECT	GO:0051726~regulation of cell cycle	7	3.01724	0.0073817	RB1, CCNB1, JUN, IRF1, STAT3, PTEN, E2F2	232	124	16792	4.08593	1	0.0593773	0.0526648
GOTERM_BP_DIRECT	GO:0007565~female pregnancy	6	2.58621	0.00768268	IL4, THBD, CLDN4, TGFB1, BCL2, FOS	232	89	16792	4.8795	1	0.0616182	0.0546523
GOTERM_BP_DIRECT	GO:0032922~circadian regulation of gene expression	5	2.15517	0.00779671	IL6, IFNG, BCL2, CCL2, TNF	232	57	16792	6.34906	1	0.0616508	0.0546812
GOTERM_BP_DIRECT	GO:0006959~humoral immune response	5	2.15517	0.00779671	NCOA2, AHR, TOP1, PPARA, SIRT1	232	57	16792	6.34906	1	0.0616508	0.0546812
GOTERM_BP_DIRECT	GO:0043117~positive regulation of vascular permeability	3	1.2931	0.00788426	TGFB1, ADIPOQ, PTEN	232	10	16792	21.7138	1	0.0616508	0.0546812
GOTERM_BP_DIRECT	GO:0050765~negative regulation of phagocytosis	3	1.2931	0.00788426	TGFB1, PDE3A, VEGFA	232	10	16792	21.7138	1	0.0616508	0.0546812
GOTERM_BP_DIRECT	GO:0019371~cyclooxygenase pathway	3	1.2931	0.00788426	AKR1C3, PTGS2, PTGS1	232	10	16792	21.7138	1	0.0616508	0.0546812
GOTERM_BP_DIRECT	GO:0051607~defense response to virus	8	3.44828	0.00792768	HERC5, CXCL10, IL6, IFNG, STAT1, IRF1, BCL2, RELA	232	165	16792	3.5093	1	0.0616508	0.0546812
GOTERM_BP_DIRECT	GO:0010803~regulation of tumor necrosis factor-mediated signaling pathway	4	1.72414	0.00793326	COL1A1, CXCL8, MYC, CCL2	232	30	16792	9.65057	1	0.0616508	0.0546812
GOTERM_BP_DIRECT	GO:0033574~response to testosterone	4	1.72414	0.00793326	CDKN1A, BAD, BAX, TP53	232	30	16792	9.65057	1	0.0616508	0.0546812
GOTERM_BP_DIRECT	GO:0097193~intrinsic apoptotic signaling pathway	4	1.72414	0.00793326	CDK4, BAD, HSF1, NKX3-1	232	30	16792	9.65057	1	0.0616508	0.0546812
GOTERM_BP_DIRECT	GO:0044344~cellular response to fibroblast growth factor stimulus	4	1.72414	0.00793326	CHEK2, CHEK1, E2F1, MAPK14	232	30	16792	9.65057	1	0.0616508	0.0546812
GOTERM_BP_DIRECT	GO:0000077~DNA damage checkpoint	4	1.72414	0.00793326	IKBKB, CASP8, CHUK, TNF	232	30	16792	9.65057	1	0.0616508	0.0546812
GOTERM_BP_DIRECT	GO:0042771~intrinsic apoptotic signaling pathway in response to DNA damage by p53 class mediator	4	1.72414	0.00869539	PPP3CA, DRD1, ICAM1, SOD1	232	31	16792	9.33927	1	0.0671939	0.0595976
GOTERM_BP_DIRECT	GO:0001975~response to amphetamine	4	1.72414	0.00869539	CDKN1A, CHEK2, SIRT1, TP53	232	31	16792	9.33927	1	0.0671939	0.0595976
GOTERM_BP_DIRECT	GO:0006874~cellular calcium ion homeostasis	6	2.58621	0.00920599	TGFB1, PRKCB, CHRNA7, CAV1, CCL2, HTR2A	232	93	16792	4.66963	1	0.0709403	0.0629205
GOTERM_BP_DIRECT	GO:0043433~negative regulation of sequence-specific DNA binding transcription factor activity	5	2.15517	0.00932319	RB1, PIM1, HMOX1, ESR1, SIRT1	232	60	16792	6.03161	1	0.0713875	0.0633172
GOTERM_BP_DIRECT	GO:0007093~mitotic cell cycle checkpoint	4	1.72414	0.009499	RB1, TGFB1, CHEK1, BCL2L1	232	32	16792	9.04741	1	0.0713875	0.0633172
GOTERM_BP_DIRECT	GO:0034116~positive regulation of heterotypic cell-cell adhesion	3	1.2931	0.00954948	MAPK1, MAPK14, MAPK3	232	11	16792	19.7398	1	0.0713875	0.0633172
GOTERM_BP_DIRECT	GO:0031571~mitotic G1 DNA damage checkpoint	3	1.2931	0.00954948	CASP9, CHEK2, MAPK14	232	11	16792	19.7398	1	0.0713875	0.0633172
GOTERM_BP_DIRECT	GO:0030857~negative regulation of epithelial cell differentiation	3	1.2931	0.00954948	CCND1, CDK2, TP53	232	11	16792	19.7398	1	0.0713875	0.0633172
GOTERM_BP_DIRECT	GO:0008210~estrogen metabolic process	3	1.2931	0.00954948	IFNG, CCND1, CAV1	232	11	16792	19.7398	1	0.0713875	0.0633172
GOTERM_BP_DIRECT	GO:0061045~negative regulation of wound healing	3	1.2931	0.00954948	SREBF1, TGFB1, TP53	232	11	16792	19.7398	1	0.0713875	0.0633172
GOTERM_BP_DIRECT	GO:0032495~response to muramyl dipeptide	3	1.2931	0.00954948	IL10, IL1B, TNF	232	11	16792	19.7398	1	0.0713875	0.0633172
GOTERM_BP_DIRECT	GO:0030278~regulation of ossification	3	1.2931	0.00954948	NFKBIA, MAPK14, RELA	232	11	16792	19.7398	1	0.0713875	0.0633172
GOTERM_BP_DIRECT	GO:0031065~positive regulation of histone deacetylation	3	1.2931	0.00954948	UGT1A1, SULT1E1, CYP1B1	232	11	16792	19.7398	1	0.0713875	0.0633172
GOTERM_BP_DIRECT	GO:0042770~signal transduction in response to DNA damage	3	1.2931	0.00954948	GJA1, SERPINE1, HMGCR	232	11	16792	19.7398	1	0.0713875	0.0633172
GOTERM_BP_DIRECT	GO:0046777~protein autophosphorylation	8	3.44828	0.00982893	GSK3B, CHEK2, INSR, ERBB2, PIM1, KDR, AKT1, EGFR	232	172	16792	3.36648	1	0.0732775	0.0649935
GOTERM_BP_DIRECT	GO:0006950~response to stress	5	2.15517	0.00987218	MAPK8, AHSA1, AKR1B1, MAPK1, EGFR	232	61	16792	5.93273	1	0.073401	0.065103
GOTERM_BP_DIRECT	GO:0035556~intracellular signal transduction	13	5.60345	0.0101588	GSK3B, CXCL8, PRKCB, HSPB1, PRKCA, ADRA1B, MAPK14, ADRA1A, RASSF1, RASA1, AKT1, HMOX1, RAF1	232	403	16792	2.33482	1	0.0753284	0.0668125
GOTERM_BP_DIRECT	GO:0015758~glucose transport	4	1.72414	0.0103445	AKT1, SLC2A4, HK2, PPARD	232	33	16792	8.77325	1	0.0764994	0.0678511
GOTERM_BP_DIRECT	GO:0009611~response to wounding	5	2.15517	0.0110321	ACHE, TGFB1, MYC, CYP1A1, CCL2	232	63	16792	5.74439	1	0.0813655	0.0721672
GOTERM_BP_DIRECT	GO:0045787~positive regulation of cell cycle	4	1.72414	0.0112323	CCND1, CDK4, MYC, SLC6A4	232	34	16792	8.51521	1	0.0826208	0.0732805
GOTERM_BP_DIRECT	GO:0036499~PERK-mediated unfolded protein response	3	1.2931	0.0113562	CYP1A2, NR1I2, CYP3A4	232	12	16792	18.0948	1	0.0828673	0.0734991
GOTERM_BP_DIRECT	GO:0042574~retinal metabolic process	3	1.2931	0.0113562	CXCL8, CCL2, NFE2L2	232	12	16792	18.0948	1	0.0828673	0.0734991
GOTERM_BP_DIRECT	GO:0042738~exogenous drug catabolic process	3	1.2931	0.0113562	AKR1C1, AKR1C3, CYP1B1	232	12	16792	18.0948	1	0.0828673	0.0734991
GOTERM_BP_DIRECT	GO:0000086~G2/M transition of mitotic cell cycle	7	3.01724	0.011741	CDKN1A, CCNB1, CHEK2, CHEK1, CDK2, CDK1, BIRC5	232	137	16792	3.69821	1	0.0854484	0.0757884
GOTERM_BP_DIRECT	GO:0006469~negative regulation of protein kinase activity	6	2.58621	0.0118628	RB1, IL6, CDKN2A, GSTP1, HSPB1, AKT1	232	99	16792	4.38662	1	0.0861074	0.076373
GOTERM_BP_DIRECT	GO:0048565~digestive tract development	4	1.72414	0.0121628	RB1, CCNB1, TGFB1, CYP1A1	232	35	16792	8.27192	1	0.0880524	0.0780981
GOTERM_BP_DIRECT	GO:0030593~neutrophil chemotaxis	5	2.15517	0.012931	CXCL8, IFNG, IL1B, CCL2, PIK3CG	232	66	16792	5.48328	1	0.0933676	0.0828124
GOTERM_BP_DIRECT	GO:0097284~hepatocyte apoptotic process	3	1.2931	0.0133003	RB1, PIK3CG, BCL2L1	232	13	16792	16.7029	1	0.0938184	0.0832122
GOTERM_BP_DIRECT	GO:0050901~leukocyte tethering or rolling	3	1.2931	0.0133003	INSR, CDK1, NFE2L2	232	13	16792	16.7029	1	0.0938184	0.0832122
GOTERM_BP_DIRECT	GO:0048546~digestive tract morphogenesis	3	1.2931	0.0133003	VCAM1, SELE, TNF	232	13	16792	16.7029	1	0.0938184	0.0832122
GOTERM_BP_DIRECT	GO:0045995~regulation of embryonic development	3	1.2931	0.0133003	RB1, CASP8, PRKCA	232	13	16792	16.7029	1	0.0938184	0.0832122
GOTERM_BP_DIRECT	GO:0046685~response to arsenic-containing substance	3	1.2931	0.0133003	BCL2, HIF1A, EGFR	232	13	16792	16.7029	1	0.0938184	0.0832122
GOTERM_BP_DIRECT	GO:0071318~cellular response to ATP	3	1.2931	0.0133003	PTEN, DRD1, SLC6A3	232	13	16792	16.7029	1	0.0938184	0.0832122
GOTERM_BP_DIRECT	GO:0060134~prepulse inhibition	3	1.2931	0.0133003	CA2, SPP1, EGFR	232	13	16792	16.7029	1	0.0938184	0.0832122
GOTERM_BP_DIRECT	GO:0045780~positive regulation of bone resorption	3	1.2931	0.0133003	CDKN1A, PTEN, CYP1A1	232	13	16792	16.7029	1	0.0938184	0.0832122
GOTERM_BP_DIRECT	GO:0045651~positive regulation of macrophage differentiation	3	1.2931	0.0133003	CCL2, PTGS2, SOD1	232	13	16792	16.7029	1	0.0938184	0.0832122
GOTERM_BP_DIRECT	GO:0007596~blood coagulation	8	3.44828	0.0138593	COL1A1, THBD, F7, F10, PLAU, IRF1, PLAT, F3	232	184	16792	3.14693	1	0.0975112	0.0864876
GOTERM_BP_DIRECT	GO:0002576~platelet degranulation	6	2.58621	0.0138978	TGFB1, EGF, SERPINE1, IGF2, SOD1, VEGFA	232	103	16792	4.21627	1	0.097533	0.0865069
GOTERM_BP_DIRECT	GO:0007188~adenylate cyclase-modulating G-protein coupled receptor signaling pathway	4	1.72414	0.0141529	CHRM2, ADRA1D, ADRB2, ADRA1B	232	37	16792	7.82479	1	0.0990706	0.0878707
GOTERM_BP_DIRECT	GO:0002223~stimulatory C-type lectin receptor signaling pathway	6	2.58621	0.0149983	NFKBIA, IKBKB, CHUK, PSMD3, RAF1, RELA	232	105	16792	4.13596	1	0.104721	0.0928827
GOTERM_BP_DIRECT	GO:0042517~positive regulation of tyrosine phosphorylation of Stat3 protein	4	1.72414	0.0152131	BAD, BCL2, BAX, TNF	232	38	16792	7.61887	1	0.105234	0.0933371
GOTERM_BP_DIRECT	GO:0008625~extrinsic apoptotic signaling pathway via death domain receptors	4	1.72414	0.0152131	IL6, HSF1, STAT3, VEGFA	232	38	16792	7.61887	1	0.105234	0.0933371
GOTERM_BP_DIRECT	GO:2001237~negative regulation of extrinsic apoptotic signaling pathway	4	1.72414	0.0152131	IL4, AR, GSTP1, RELA	232	38	16792	7.61887	1	0.105234	0.0933371
GOTERM_BP_DIRECT	GO:0048148~behavioral response to cocaine	3	1.2931	0.0153777	CCNA2, CDK2, MMP3	232	14	16792	15.5099	1	0.105234	0.0933371
GOTERM_BP_DIRECT	GO:0071732~cellular response to nitric oxide	3	1.2931	0.0153777	ABAT, DRD1, HTR2A	232	14	16792	15.5099	1	0.105234	0.0933371
GOTERM_BP_DIRECT	GO:0070498~interleukin-1-mediated signaling pathway	3	1.2931	0.0153777	IKBKB, IL1A, MAPK3	232	14	16792	15.5099	1	0.105234	0.0933371
GOTERM_BP_DIRECT	GO:0030194~positive regulation of blood coagulation	3	1.2931	0.0153777	F7, SERPINE1, NFE2L2	232	14	16792	15.5099	1	0.105234	0.0933371
GOTERM_BP_DIRECT	GO:0042176~regulation of protein catabolic process	3	1.2931	0.0153777	CHEK2, ODC1, PSMD3	232	14	16792	15.5099	1	0.105234	0.0933371
GOTERM_BP_DIRECT	GO:0031647~regulation of protein stability	5	2.15517	0.0157698	COL1A1, MYC, CCL2, PPARG, SLC6A4	232	70	16792	5.16995	1	0.107118	0.095008
GOTERM_BP_DIRECT	GO:0071300~cellular response to retinoic acid	5	2.15517	0.0157698	SREBF1, CDKN2A, PTEN, BCL2, MAPK1	232	70	16792	5.16995	1	0.107118	0.095008
GOTERM_BP_DIRECT	GO:0030855~epithelial cell differentiation	5	2.15517	0.0157698	AKR1C1, CDK1, PPARG, CES1, VEGFA	232	70	16792	5.16995	1	0.107118	0.095008
GOTERM_BP_DIRECT	GO:0006953~acute-phase response	4	1.72414	0.0163169	HERC5, CCNA2, CDKN1A, PTEN	232	39	16792	7.42352	1	0.109483	0.0971056
GOTERM_BP_DIRECT	GO:0000302~response to reactive oxygen species	4	1.72414	0.0163169	PTGER3, HMOX1, HTR2A, FOSL2	232	39	16792	7.42352	1	0.109483	0.0971056
GOTERM_BP_DIRECT	GO:0008219~cell death	4	1.72414	0.0163169	CRP, IL6, UGT1A1, STAT3	232	39	16792	7.42352	1	0.109483	0.0971056
GOTERM_BP_DIRECT	GO:0030890~positive regulation of B cell proliferation	4	1.72414	0.0163169	GSTP1, GSR, CAT, SOD1	232	39	16792	7.42352	1	0.109483	0.0971056
GOTERM_BP_DIRECT	GO:0000079~regulation of cyclin-dependent protein serine/threonine kinase activity	4	1.72414	0.0163169	IL4, CDKN1A, BCL2, IL2	232	39	16792	7.42352	1	0.109483	0.0971056
GOTERM_BP_DIRECT	GO:0060333~interferon-gamma-mediated signaling pathway	5	2.15517	0.0165358	NFKBIA, CDKN2A, CAT, CYP1B1, SIRT1	232	71	16792	5.09713	1	0.110145	0.0976933
GOTERM_BP_DIRECT	GO:0032088~negative regulation of NF-kappaB transcription factor activity	5	2.15517	0.0165358	VCAM1, IFNG, STAT1, IRF1, ICAM1	232	71	16792	5.09713	1	0.110145	0.0976933
GOTERM_BP_DIRECT	GO:0070098~chemokine-mediated signaling pathway	5	2.15517	0.0165358	CXCL10, CXCL11, CXCL8, CCL2, CXCL2	232	71	16792	5.09713	1	0.110145	0.0976933
GOTERM_BP_DIRECT	GO:0006821~chloride transport	4	1.72414	0.0174646	ACHE, CAT, HMGCR, TP53	232	40	16792	7.23793	1	0.114631	0.101672
GOTERM_BP_DIRECT	GO:0051262~protein tetramerization	4	1.72414	0.0174646	BAX, APOB, DUOX2, BCL2L1	232	40	16792	7.23793	1	0.114631	0.101672
GOTERM_BP_DIRECT	GO:0009566~fertilization	4	1.72414	0.0174646	GABRA2, GABRA1, GABRA6, GABRA5	232	40	16792	7.23793	1	0.114631	0.101672
GOTERM_BP_DIRECT	GO:0045725~positive regulation of glycogen biosynthetic process	3	1.2931	0.0175843	IL10, MMP2, MMP9	232	15	16792	14.4759	1	0.114631	0.101672
GOTERM_BP_DIRECT	GO:0043122~regulation of I-kappaB kinase/NF-kappaB signaling	3	1.2931	0.0175843	RB1, TGFB1, PARP1	232	15	16792	14.4759	1	0.114631	0.101672
GOTERM_BP_DIRECT	GO:1904707~positive regulation of vascular smooth muscle cell proliferation	3	1.2931	0.0175843	IL1B, HSPB1, TNF	232	15	16792	14.4759	1	0.114631	0.101672
GOTERM_BP_DIRECT	GO:0021854~hypothalamus development	3	1.2931	0.0175843	ABCC1, ALOX5, LTA4H	232	15	16792	14.4759	1	0.114631	0.101672
GOTERM_BP_DIRECT	GO:2000679~positive regulation of transcription regulatory region DNA binding	3	1.2931	0.0175843	NCOA1, MYC, BAX	232	15	16792	14.4759	1	0.114631	0.101672
GOTERM_BP_DIRECT	GO:0006691~leukotriene metabolic process	3	1.2931	0.0175843	INSR, IGF2, AKT1	232	15	16792	14.4759	1	0.114631	0.101672
GOTERM_BP_DIRECT	GO:0050729~positive regulation of inflammatory response	5	2.15517	0.0181368	SERPINE1, CCL2, LDLR, EGFR, IL2	232	73	16792	4.95749	1	0.117954	0.104619
GOTERM_BP_DIRECT	GO:0032526~response to retinoic acid	4	1.72414	0.0186562	GJA1, BAD, ABAT, PPARD	232	41	16792	7.0614	1	0.120477	0.106857
GOTERM_BP_DIRECT	GO:0044255~cellular lipid metabolic process	4	1.72414	0.0186562	NCOA1, NCOA2, RXRA, PPARA	232	41	16792	7.0614	1	0.120477	0.106857
GOTERM_BP_DIRECT	GO:0032024~positive regulation of insulin secretion	4	1.72414	0.0186562	NCOA1, SREBF1, RXRA, PPARG	232	41	16792	7.0614	1	0.120477	0.106857
GOTERM_BP_DIRECT	GO:1900034~regulation of cellular response to heat	5	2.15517	0.0198311	GSK3B, HSF1, MAPK1, SIRT1, MAPK3	232	75	16792	4.82529	1	0.126535	0.11223
GOTERM_BP_DIRECT	GO:0008209~androgen metabolic process	3	1.2931	0.0199162	CDKN1A, CHEK2, TP53	232	16	16792	13.5711	1	0.126535	0.11223
GOTERM_BP_DIRECT	GO:0097194~execution phase of apoptosis	3	1.2931	0.0199162	CYP3A4, ESR1, CYP19A1	232	16	16792	13.5711	1	0.126535	0.11223
GOTERM_BP_DIRECT	GO:0006978~DNA damage response, signal transduction by p53 class mediator resulting in transcription of p21 class mediator	3	1.2931	0.0199162	CAV1, APOB, LDLR	232	16	16792	13.5711	1	0.126535	0.11223
GOTERM_BP_DIRECT	GO:0050995~negative regulation of lipid catabolic process	3	1.2931	0.0199162	CXCL10, SERPINE1, CCL2	232	16	16792	13.5711	1	0.126535	0.11223
GOTERM_BP_DIRECT	GO:0090026~positive regulation of monocyte chemotaxis	3	1.2931	0.0199162	IL1B, TNF, ADRA2A	232	16	16792	13.5711	1	0.126535	0.11223
GOTERM_BP_DIRECT	GO:0030301~cholesterol transport	3	1.2931	0.0199162	CASP8, CASP3, AKT1	232	16	16792	13.5711	1	0.126535	0.11223
GOTERM_BP_DIRECT	GO:0006260~DNA replication	7	3.01724	0.0204024	ACHE, EGF, CHEK1, CDK2, CDK1, TOP1, SIRT1	232	155	16792	3.26874	1	0.129325	0.114704
GOTERM_BP_DIRECT	GO:0030324~lung development	5	2.15517	0.0207136	SREBF1, NOS3, CYP1A2, EGFR, VEGFA	232	76	16792	4.7618	1	0.130695	0.11592
GOTERM_BP_DIRECT	GO:0006816~calcium ion transport	5	2.15517	0.0207136	PPP3CA, PRKCB, CHRNA7, CAV1, CACNA1S	232	76	16792	4.7618	1	0.130695	0.11592
GOTERM_BP_DIRECT	GO:0045785~positive regulation of cell adhesion	4	1.72414	0.0211716	ERBB2, PRKCA, TNF, VEGFA	232	43	16792	6.73296	1	0.13328	0.118212
GOTERM_BP_DIRECT	GO:0060307~regulation of ventricular cardiac muscle cell membrane repolarization	3	1.2931	0.0223697	PON1, CAT, PTGS2	232	17	16792	12.7728	1	0.137671	0.122108
GOTERM_BP_DIRECT	GO:0030224~monocyte differentiation	3	1.2931	0.0223697	AKT1, PPARG, ACACA	232	17	16792	12.7728	1	0.137671	0.122108
GOTERM_BP_DIRECT	GO:0070542~response to fatty acid	3	1.2931	0.0223697	CAV1, BCL2, BCL2L1	232	17	16792	12.7728	1	0.137671	0.122108
GOTERM_BP_DIRECT	GO:0032722~positive regulation of chemokine production	3	1.2931	0.0223697	JUN, PPARG, VEGFA	232	17	16792	12.7728	1	0.137671	0.122108
GOTERM_BP_DIRECT	GO:0042789~mRNA transcription from RNA polymerase II promoter	3	1.2931	0.0223697	KCNH2, GJA1, SCN5A	232	17	16792	12.7728	1	0.137671	0.122108
GOTERM_BP_DIRECT	GO:0048514~blood vessel morphogenesis	3	1.2931	0.0223697	NCOA1, HAS2, OPRM1	232	17	16792	12.7728	1	0.137671	0.122108
GOTERM_BP_DIRECT	GO:0009416~response to light stimulus	3	1.2931	0.0223697	GJA1, RASA1, CYP1B1	232	17	16792	12.7728	1	0.137671	0.122108
GOTERM_BP_DIRECT	GO:0071380~cellular response to prostaglandin E stimulus	3	1.2931	0.0223697	SREBF1, STAT3, HIF1A	232	17	16792	12.7728	1	0.137671	0.122108
GOTERM_BP_DIRECT	GO:0044849~estrous cycle	3	1.2931	0.0223697	MAPK10, FOS, ELK1	232	17	16792	12.7728	1	0.137671	0.122108
GOTERM_BP_DIRECT	GO:2000811~negative regulation of anoikis	3	1.2931	0.0223697	IL6, HIF1A, TNF	232	17	16792	12.7728	1	0.137671	0.122108
GOTERM_BP_DIRECT	GO:0007077~mitotic nuclear envelope disassembly	4	1.72414	0.0224956	CCNB1, PRKCB, CDK1, PRKCA	232	44	16792	6.57994	1	0.138137	0.122521
GOTERM_BP_DIRECT	GO:0008286~insulin receptor signaling pathway	5	2.15517	0.0225501	SREBF1, PTPN1, INSR, IGF2, AKT1	232	78	16792	4.6397	1	0.138164	0.122544
GOTERM_BP_DIRECT	GO:0016925~protein sumoylation	6	2.58621	0.0228337	TOP2A, PARP1, CDKN2A, BIRC5, TOP1, TP53	232	117	16792	3.71176	1	0.13959	0.123809
GOTERM_BP_DIRECT	GO:0050728~negative regulation of inflammatory response	5	2.15517	0.0235044	CHRNA7, ADIPOQ, PPARA, IL2, PPARD	232	79	16792	4.58097	1	0.143372	0.127164
GOTERM_BP_DIRECT	GO:0030968~endoplasmic reticulum unfolded protein response	4	1.72414	0.0238637	PTPN1, IFNG, CCND1, NFE2L2	232	45	16792	6.43372	1	0.144601	0.128254
GOTERM_BP_DIRECT	GO:0032147~activation of protein kinase activity	4	1.72414	0.0238637	INSR, ADRA2A, NKX3-1, VEGFA	232	45	16792	6.43372	1	0.144601	0.128254
GOTERM_BP_DIRECT	GO:0032755~positive regulation of interleukin-6 production	4	1.72414	0.0238637	IL1A, IL6, IL1B, TNF	232	45	16792	6.43372	1	0.144601	0.128254
GOTERM_BP_DIRECT	GO:0048384~retinoic acid receptor signaling pathway	3	1.2931	0.0249409	MAPK1, RAF1, MAPK3	232	18	16792	12.0632	1	0.149483	0.132584
GOTERM_BP_DIRECT	GO:0035066~positive regulation of histone acetylation	3	1.2931	0.0249409	CHRM3, HTR2A, ADRA1A	232	18	16792	12.0632	1	0.149483	0.132584
GOTERM_BP_DIRECT	GO:0019373~epoxygenase P450 pathway	3	1.2931	0.0249409	TGFB1, IL1B, MAPK3	232	18	16792	12.0632	1	0.149483	0.132584
GOTERM_BP_DIRECT	GO:0060324~face development	3	1.2931	0.0249409	RXRB, RXRA, RXRG	232	18	16792	12.0632	1	0.149483	0.132584
GOTERM_BP_DIRECT	GO:0006939~smooth muscle contraction	3	1.2931	0.0249409	CYP1A2, CYP1A1, CYP1B1	232	18	16792	12.0632	1	0.149483	0.132584
GOTERM_BP_DIRECT	GO:0009267~cellular response to starvation	4	1.72414	0.0267323	SREBF1, CAV1, AKR1C3, SIRT1	232	47	16792	6.15994	1	0.157676	0.139851
GOTERM_BP_DIRECT	GO:0014806~smooth muscle hyperplasia	2	0.862069	0.0273247	COL1A1, PPARG	232	2	16792	72.3793	1	0.157676	0.139851
GOTERM_BP_DIRECT	GO:0001912~positive regulation of leukocyte mediated cytotoxicity	2	0.862069	0.0273247	NOS2, CCL2	232	2	16792	72.3793	1	0.157676	0.139851
GOTERM_BP_DIRECT	GO:0032227~negative regulation of synaptic transmission, dopaminergic	2	0.862069	0.0273247	RXRA, TNF	232	2	16792	72.3793	1	0.157676	0.139851
GOTERM_BP_DIRECT	GO:0001996~positive regulation of heart rate by epinephrine-norepinephrine	2	0.862069	0.0273247	BAD, BCL2L1	232	2	16792	72.3793	1	0.157676	0.139851
GOTERM_BP_DIRECT	GO:0035408~histone H3-T6 phosphorylation	2	0.862069	0.0273247	IFNG, TNF	232	2	16792	72.3793	1	0.157676	0.139851
GOTERM_BP_DIRECT	GO:0019050~suppression by virus of host apoptotic process	2	0.862069	0.0273247	AKR1C3, APOB	232	2	16792	72.3793	1	0.157676	0.139851
GOTERM_BP_DIRECT	GO:0045994~positive regulation of translational initiation by iron	2	0.862069	0.0273247	BCL2, BAX	232	2	16792	72.3793	1	0.157676	0.139851
GOTERM_BP_DIRECT	GO:0060557~positive regulation of vitamin D biosynthetic process	2	0.862069	0.0273247	KCNMA1, ADRA1A	232	2	16792	72.3793	1	0.157676	0.139851
GOTERM_BP_DIRECT	GO:0001997~positive regulation of the force of heart contraction by epinephrine-norepinephrine	2	0.862069	0.0273247	NCOA1, NCOA2	232	2	16792	72.3793	1	0.157676	0.139851
GOTERM_BP_DIRECT	GO:0071379~cellular response to prostaglandin stimulus	2	0.862069	0.0273247	PRKCB, PRKCA	232	2	16792	72.3793	1	0.157676	0.139851
GOTERM_BP_DIRECT	GO:0006808~regulation of nitrogen utilization	2	0.862069	0.0273247	ADRB1, ADRA1A	232	2	16792	72.3793	1	0.157676	0.139851
GOTERM_BP_DIRECT	GO:0003057~regulation of the force of heart contraction by chemical signal	2	0.862069	0.0273247	PTGS2, SLC6A4	232	2	16792	72.3793	1	0.157676	0.139851
GOTERM_BP_DIRECT	GO:1904017~cellular response to Thyroglobulin triiodothyronine	2	0.862069	0.0273247	ADRB1, ADRA1A	232	2	16792	72.3793	1	0.157676	0.139851
GOTERM_BP_DIRECT	GO:0060073~micturition	2	0.862069	0.0273247	ABAT, EGFR	232	2	16792	72.3793	1	0.157676	0.139851
GOTERM_BP_DIRECT	GO:0071306~cellular response to vitamin E	2	0.862069	0.0273247	NOS3, CAV1	232	2	16792	72.3793	1	0.157676	0.139851
GOTERM_BP_DIRECT	GO:1902722~positive regulation of prolactin secretion	2	0.862069	0.0273247	NOS3, HMOX1	232	2	16792	72.3793	1	0.157676	0.139851
GOTERM_BP_DIRECT	GO:0060070~canonical Wnt signaling pathway	5	2.15517	0.0275648	GSK3B, CCND1, EGF, MYC, PTEN	232	83	16792	4.3602	1	0.157676	0.139851
GOTERM_BP_DIRECT	GO:0032332~positive regulation of chondrocyte differentiation	3	1.2931	0.0276263	GSK3B, IL1B, TP53	232	19	16792	11.4283	1	0.157676	0.139851
GOTERM_BP_DIRECT	GO:0046716~muscle cell cellular homeostasis	3	1.2931	0.0276263	DRD1, PTGS2, EGFR	232	19	16792	11.4283	1	0.157676	0.139851
GOTERM_BP_DIRECT	GO:0001894~tissue homeostasis	3	1.2931	0.0276263	RB1, AKR1B1, ACACA	232	19	16792	11.4283	1	0.157676	0.139851
GOTERM_BP_DIRECT	GO:0046827~positive regulation of protein export from nucleus	3	1.2931	0.0276263	POR, RELA, RUNX2	232	19	16792	11.4283	1	0.157676	0.139851
GOTERM_BP_DIRECT	GO:0051968~positive regulation of synaptic transmission, glutamatergic	3	1.2931	0.0276263	IL6, HIF1A, SOD1	232	19	16792	11.4283	1	0.157676	0.139851
GOTERM_BP_DIRECT	GO:1901796~regulation of signal transduction by p53 class mediator	6	2.58621	0.0284372	CHEK2, CHEK1, CDK2, AKT1, MAPK14, TP53	232	124	16792	3.50222	1	0.161969	0.143658
GOTERM_BP_DIRECT	GO:0030307~positive regulation of cell growth	5	2.15517	0.0286411	PTEN, ABAT, OPRM1, SLC6A3, SOD1	232	84	16792	4.30829	1	0.162457	0.144092
GOTERM_BP_DIRECT	GO:0007626~locomotory behavior	5	2.15517	0.0286411	ERBB2, BCL2, AKT1, EGFR, IL2	232	84	16792	4.30829	1	0.162457	0.144092
GOTERM_BP_DIRECT	GO:0014070~response to organic cyclic compound	4	1.72414	0.0297769	COL1A1, TGFB1, CAV1, PDE3A	232	49	16792	5.90852	1	0.168206	0.14919
GOTERM_BP_DIRECT	GO:0071560~cellular response to transforming growth factor beta stimulus	4	1.72414	0.0297769	IL4, CYP1A1, CDK1, ICAM1	232	49	16792	5.90852	1	0.168206	0.14919
GOTERM_BP_DIRECT	GO:0006801~superoxide metabolic process	3	1.2931	0.0304221	SPP1, PTGS2, PPARD	232	20	16792	10.8569	1	0.168732	0.149657
GOTERM_BP_DIRECT	GO:0014911~positive regulation of smooth muscle cell migration	3	1.2931	0.0304221	CHRM5, DRD1, SOD1	232	20	16792	10.8569	1	0.168732	0.149657
GOTERM_BP_DIRECT	GO:0001892~embryonic placenta development	3	1.2931	0.0304221	CAT, MPO, DUOX2	232	20	16792	10.8569	1	0.168732	0.149657
GOTERM_BP_DIRECT	GO:0042744~hydrogen peroxide catabolic process	3	1.2931	0.0304221	POR, CAV1, RELA	232	20	16792	10.8569	1	0.168732	0.149657
GOTERM_BP_DIRECT	GO:0071375~cellular response to peptide hormone stimulus	3	1.2931	0.0304221	MYC, BCL2, HAS2	232	20	16792	10.8569	1	0.168732	0.149657
GOTERM_BP_DIRECT	GO:0042326~negative regulation of phosphorylation	3	1.2931	0.0304221	HSF1, HIF1A, EGFR	232	20	16792	10.8569	1	0.168732	0.149657
GOTERM_BP_DIRECT	GO:0046697~decidualization	3	1.2931	0.0304221	CDKN1A, CDKN2A, SIRT1	232	20	16792	10.8569	1	0.168732	0.149657
GOTERM_BP_DIRECT	GO:2000377~regulation of reactive oxygen species metabolic process	3	1.2931	0.0304221	NCF1, NOS2, SOD1	232	20	16792	10.8569	1	0.168732	0.149657
GOTERM_BP_DIRECT	GO:0019226~transmission of nerve impulse	3	1.2931	0.0304221	EIF6, CYP1B1, TNF	232	20	16792	10.8569	1	0.168732	0.149657
GOTERM_BP_DIRECT	GO:0001822~kidney development	5	2.15517	0.0308681	CA2, ODC1, BAX, HAS2, VEGFA	232	86	16792	4.2081	1	0.170861	0.151545
GOTERM_BP_DIRECT	GO:0071277~cellular response to calcium ion	4	1.72414	0.0329967	JUN, AKR1C3, FOS, SCN5A	232	51	16792	5.67681	1	0.181898	0.161334
GOTERM_BP_DIRECT	GO:2000378~negative regulation of reactive oxygen species metabolic process	3	1.2931	0.0333248	ABCC1, PRSS1, CTRB1	232	21	16792	10.3399	1	0.181898	0.161334
GOTERM_BP_DIRECT	GO:0042730~fibrinolysis	3	1.2931	0.0333248	CDKN2A, CDK1, AKT1	232	21	16792	10.3399	1	0.181898	0.161334
GOTERM_BP_DIRECT	GO:0042346~positive regulation of NF-kappaB import into nucleus	3	1.2931	0.0333248	PLAU, SERPINE1, PLAT	232	21	16792	10.3399	1	0.181898	0.161334
GOTERM_BP_DIRECT	GO:0002028~regulation of sodium ion transport	3	1.2931	0.0333248	TGFB1, NOS3, ADRB2	232	21	16792	10.3399	1	0.181898	0.161334
GOTERM_BP_DIRECT	GO:1900182~positive regulation of protein localization to nucleus	3	1.2931	0.0333248	BCL2, HIF1A, HK2	232	21	16792	10.3399	1	0.181898	0.161334
GOTERM_BP_DIRECT	GO:0009235~cobalamin metabolic process	3	1.2931	0.0333248	IL1B, PTGS2, TNF	232	21	16792	10.3399	1	0.181898	0.161334
GOTERM_BP_DIRECT	GO:0051260~protein homooligomerization	7	3.01724	0.0359056	CAV1, AKR1C1, HSF1, ADIPOQ, BAX, HMOX1, SLC6A4	232	177	16792	2.86246	1	0.195597	0.173485
GOTERM_BP_DIRECT	GO:0007166~cell surface receptor signaling pathway	9	3.87931	0.0361716	CXCL10, CASP8, IFNG, CHRM4, ERBB2, CCL2, ADRB2, MAPK14, EGFR	232	274	16792	2.37742	1	0.195974	0.173819
GOTERM_BP_DIRECT	GO:2001243~negative regulation of intrinsic apoptotic signaling pathway	3	1.2931	0.0363311	AKT1, HIF1A, ESR1	232	22	16792	9.86991	1	0.195974	0.173819
GOTERM_BP_DIRECT	GO:1901687~glutathione derivative biosynthetic process	3	1.2931	0.0363311	CCNB1, CDK1, MAPK14	232	22	16792	9.86991	1	0.195974	0.173819
GOTERM_BP_DIRECT	GO:0051000~positive regulation of nitric-oxide synthase activity	3	1.2931	0.0363311	BCL2, MMP9, BCL2L1	232	22	16792	9.86991	1	0.195974	0.173819
GOTERM_BP_DIRECT	GO:0060045~positive regulation of cardiac muscle cell proliferation	3	1.2931	0.0363311	GSTM2, GSTM1, GSTP1	232	22	16792	9.86991	1	0.195974	0.173819
GOTERM_BP_DIRECT	GO:0007179~transforming growth factor beta receptor signaling pathway	5	2.15517	0.0381467	JUN, TGFB1, PARP1, CCL2, FOS	232	92	16792	3.93366	1	0.204992	0.181818
GOTERM_BP_DIRECT	GO:0048511~rhythmic process	4	1.72414	0.0381519	TOP2A, MAPK10, MAPK8, PPARG	232	54	16792	5.36143	1	0.204992	0.181818
GOTERM_BP_DIRECT	GO:0051439~regulation of ubiquitin-protein ligase activity involved in mitotic cell cycle	3	1.2931	0.0394375	EGF, NKX3-1, VEGFA	232	23	16792	9.44078	1	0.206189	0.18288
GOTERM_BP_DIRECT	GO:0009617~response to bacterium	3	1.2931	0.0394375	PRKCA, OPRM1, ADRA2A	232	23	16792	9.44078	1	0.206189	0.18288
GOTERM_BP_DIRECT	GO:0048754~branching morphogenesis of an epithelial tube	3	1.2931	0.0394375	NOS2, CAV1, CCL2	232	23	16792	9.44078	1	0.206189	0.18288
GOTERM_BP_DIRECT	GO:0007194~negative regulation of adenylate cyclase activity	3	1.2931	0.0394375	CCNB1, CDK2, CDK1	232	23	16792	9.44078	1	0.206189	0.18288
GOTERM_BP_DIRECT	GO:1902476~chloride transmembrane transport	5	2.15517	0.0394474	GABRA2, GABRA1, GABRA6, GABRA5, GABRA3	232	93	16792	3.89136	1	0.206189	0.18288
GOTERM_BP_DIRECT	GO:0042475~odontogenesis of dentin-containing tooth	4	1.72414	0.0399562	CA2, BAX, SCN5A, RUNX2	232	55	16792	5.26395	1	0.206189	0.18288
GOTERM_BP_DIRECT	GO:0001781~neutrophil apoptotic process	2	0.862069	0.0407069	IL1A, IL1B	232	3	16792	48.2529	1	0.206189	0.18288
GOTERM_BP_DIRECT	GO:0000189~MAPK import into nucleus	2	0.862069	0.0407069	IL6, MYC	232	3	16792	48.2529	1	0.206189	0.18288
GOTERM_BP_DIRECT	GO:0071930~negative regulation of transcription involved in G1/S transition of mitotic cell cycle	2	0.862069	0.0407069	IL10, CAT	232	3	16792	48.2529	1	0.206189	0.18288
GOTERM_BP_DIRECT	GO:0061308~cardiac neural crest cell development involved in heart development	2	0.862069	0.0407069	MYC, INSR	232	3	16792	48.2529	1	0.206189	0.18288
GOTERM_BP_DIRECT	GO:0010871~negative regulation of receptor biosynthetic process	2	0.862069	0.0407069	IFNG, NOS2	232	3	16792	48.2529	1	0.206189	0.18288
GOTERM_BP_DIRECT	GO:0014854~response to inactivity	2	0.862069	0.0407069	F7, F3	232	3	16792	48.2529	1	0.206189	0.18288
GOTERM_BP_DIRECT	GO:0001660~fever generation	2	0.862069	0.0407069	PRKCB, IL1B	232	3	16792	48.2529	1	0.206189	0.18288
GOTERM_BP_DIRECT	GO:2000111~positive regulation of macrophage apoptotic process	2	0.862069	0.0407069	RB1, E2F1	232	3	16792	48.2529	1	0.206189	0.18288
GOTERM_BP_DIRECT	GO:0033590~response to cobalamin	2	0.862069	0.0407069	ADRB1, ADRB2	232	3	16792	48.2529	1	0.206189	0.18288
GOTERM_BP_DIRECT	GO:0034435~cholesterol esterification	2	0.862069	0.0407069	SIRT1, TP53	232	3	16792	48.2529	1	0.206189	0.18288
GOTERM_BP_DIRECT	GO:0031649~heat generation	2	0.862069	0.0407069	IL10, TNF	232	3	16792	48.2529	1	0.206189	0.18288
GOTERM_BP_DIRECT	GO:0060154~cellular process regulating host cell cycle in response to virus	2	0.862069	0.0407069	MAPK1, MAPK3	232	3	16792	48.2529	1	0.206189	0.18288
GOTERM_BP_DIRECT	GO:1902512~positive regulation of apoptotic DNA fragmentation	2	0.862069	0.0407069	CDKN2A, SIRT1	232	3	16792	48.2529	1	0.206189	0.18288
GOTERM_BP_DIRECT	GO:0051097~negative regulation of helicase activity	2	0.862069	0.0407069	GSTM2, GSTM1	232	3	16792	48.2529	1	0.206189	0.18288
GOTERM_BP_DIRECT	GO:0019087~transformation of host cell by virus	2	0.862069	0.0407069	PPARG, PPARA	232	3	16792	48.2529	1	0.206189	0.18288
GOTERM_BP_DIRECT	GO:1990646~cellular response to prolactin	2	0.862069	0.0407069	IL6, IFNG	232	3	16792	48.2529	1	0.206189	0.18288
GOTERM_BP_DIRECT	GO:0010829~negative regulation of glucose transport	2	0.862069	0.0407069	MAPK1, MAPK3	232	3	16792	48.2529	1	0.206189	0.18288
GOTERM_BP_DIRECT	GO:0070458~cellular detoxification of nitrogen compound	2	0.862069	0.0407069	BAD, BCL2L1	232	3	16792	48.2529	1	0.206189	0.18288
GOTERM_BP_DIRECT	GO:0002679~respiratory burst involved in defense response	2	0.862069	0.0407069	IL10, BAX	232	3	16792	48.2529	1	0.206189	0.18288
GOTERM_BP_DIRECT	GO:0051712~positive regulation of killing of cells of other organism	2	0.862069	0.0407069	RELA, EGFR	232	3	16792	48.2529	1	0.206189	0.18288
GOTERM_BP_DIRECT	GO:0032800~receptor biosynthetic process	2	0.862069	0.0407069	MPO, PIK3CG	232	3	16792	48.2529	1	0.206189	0.18288
GOTERM_BP_DIRECT	GO:0002693~positive regulation of cellular extravasation	2	0.862069	0.0407069	HSF1, BAX	232	3	16792	48.2529	1	0.206189	0.18288
GOTERM_BP_DIRECT	GO:0002904~positive regulation of B cell apoptotic process	2	0.862069	0.0407069	SOAT1, SOAT2	232	3	16792	48.2529	1	0.206189	0.18288
GOTERM_BP_DIRECT	GO:0010641~positive regulation of platelet-derived growth factor receptor signaling pathway	2	0.862069	0.0407069	ADRB1, ADRB2	232	3	16792	48.2529	1	0.206189	0.18288
GOTERM_BP_DIRECT	GO:0002025~vasodilation by norepinephrine-epinephrine involved in regulation of systemic arterial blood pressure	2	0.862069	0.0407069	CCL2, ICAM1	232	3	16792	48.2529	1	0.206189	0.18288
GOTERM_BP_DIRECT	GO:0046854~phosphatidylinositol phosphorylation	5	2.15517	0.0407732	ERBB3, EGF, ERBB2, EGFR, PIK3CG	232	94	16792	3.84996	1	0.206189	0.18288
GOTERM_BP_DIRECT	GO:0021987~cerebral cortex development	4	1.72414	0.0418032	NCOA1, BAD, BAX, HIF1A	232	56	16792	5.16995	1	0.21101	0.187155
GOTERM_BP_DIRECT	GO:0030336~negative regulation of cell migration	5	2.15517	0.042124	ADIPOQ, SERPINE1, PTEN, BCL2, CYP1B1	232	95	16792	3.80944	1	0.21224	0.188247
GOTERM_BP_DIRECT	GO:0070371~ERK1 and ERK2 cascade	3	1.2931	0.0426408	OPRD1, GJA1, BCL2	232	24	16792	9.04741	1	0.21367	0.189515
GOTERM_BP_DIRECT	GO:0051924~regulation of calcium ion transport	3	1.2931	0.0426408	TNF, ADRA2A, SOD1	232	24	16792	9.04741	1	0.21367	0.189515
GOTERM_BP_DIRECT	GO:0001819~positive regulation of cytokine production	3	1.2931	0.0426408	EGF, MAPK1, MAPK3	232	24	16792	9.04741	1	0.21367	0.189515
GOTERM_BP_DIRECT	GO:0007169~transmembrane receptor protein tyrosine kinase signaling pathway	5	2.15517	0.0435	ERBB3, INSR, ERBB2, KDR, EGFR	232	96	16792	3.76976	1	0.217579	0.192982
GOTERM_BP_DIRECT	GO:0008360~regulation of cell shape	6	2.58621	0.0442994	IL6, RASA1, KDR, CCL2, ICAM1, VEGFA	232	140	16792	3.10197	1	0.221175	0.196171
GOTERM_BP_DIRECT	GO:0051259~protein oligomerization	4	1.72414	0.0456237	PTPN1, GSTP1, ADIPOQ, PTEN	232	58	16792	4.99168	1	0.226478	0.200875
GOTERM_BP_DIRECT	GO:0070373~negative regulation of ERK1 and ERK2 cascade	4	1.72414	0.0456237	AR, GJA1, BAX, SLC6A4	232	58	16792	4.99168	1	0.226478	0.200875
GOTERM_BP_DIRECT	GO:0033344~cholesterol efflux	3	1.2931	0.0459377	TGFB1, CDKN2A, TP53	232	25	16792	8.68552	1	0.226478	0.200875
GOTERM_BP_DIRECT	GO:0050715~positive regulation of cytokine secretion	3	1.2931	0.0459377	IKBKB, CASP8, CHUK	232	25	16792	8.68552	1	0.226478	0.200875
GOTERM_BP_DIRECT	GO:0042327~positive regulation of phosphorylation	3	1.2931	0.0459377	SOAT1, SOAT2, APOB	232	25	16792	8.68552	1	0.226478	0.200875
GOTERM_BP_DIRECT	GO:0070423~nucleotide-binding oligomerization domain containing signaling pathway	3	1.2931	0.0459377	IL10, IL1A, TNF	232	25	16792	8.68552	1	0.226478	0.200875
GOTERM_BP_DIRECT	GO:0071158~positive regulation of cell cycle arrest	3	1.2931	0.0459377	AR, EGF, EGFR	232	25	16792	8.68552	1	0.226478	0.200875
GOTERM_BP_DIRECT	GO:0007268~chemical synaptic transmission	8	3.44828	0.0487789	OPRD1, GRIA2, GABRA5, MAPK1, HTR2A, OPRM1, SLC6A2, SLC6A4	232	240	16792	2.41264	1	0.240055	0.212917
GOTERM_BP_DIRECT	GO:0016310~phosphorylation	5	2.15517	0.0492544	STAT3, AKT1, TOP1, PIK3CG, MAPK3	232	100	16792	3.61897	1	0.241447	0.214152
GOTERM_BP_DIRECT	GO:0002053~positive regulation of mesenchymal cell proliferation	3	1.2931	0.0493251	OPRD1, STAT3, OPRM1	232	26	16792	8.35146	1	0.241447	0.214152
GOTERM_BP_DIRECT	GO:0042755~eating behavior	3	1.2931	0.0493251	STAT1, MYC, VEGFA	232	26	16792	8.35146	1	0.241447	0.214152
GOTERM_BP_DIRECT	GO:0051289~protein homotetramerization	4	1.72414	0.0496111	RXRA, CAT, RXRG, ACACA	232	60	16792	4.82529	1	0.242416	0.215011
GOTERM_BP_DIRECT	GO:0006366~transcription from RNA polymerase II promoter	13	5.60345	0.0516467	JUN, PARP1, AHR, FOS, ELK1, HIF1A, ESR1, RELA, RUNX2, MYC, IRF1, TP53, NFE2L2	232	513	16792	1.83417	1	0.247158	0.219217
GOTERM_BP_DIRECT	GO:0001523~retinoid metabolic process	4	1.72414	0.0516665	AKR1C1, AKR1C3, APOB, PLB1	232	61	16792	4.74618	1	0.247158	0.219217
GOTERM_BP_DIRECT	GO:0042104~positive regulation of activated T cell proliferation	3	1.2931	0.0527998	CDK1, BAX, SOD1	232	27	16792	8.04215	1	0.247158	0.219217
GOTERM_BP_DIRECT	GO:0048678~response to axon injury	3	1.2931	0.0527998	IL4, IGF2, IL2	232	27	16792	8.04215	1	0.247158	0.219217
GOTERM_BP_DIRECT	GO:0030198~extracellular matrix organization	7	3.01724	0.053596	COL1A1, VCAM1, SERPINE1, SPP1, KDR, TNF, ICAM1	232	196	16792	2.58498	1	0.247158	0.219217
GOTERM_BP_DIRECT	GO:0060574~intestinal epithelial cell maturation	2	0.862069	0.0539058	IL6, CCL2	232	4	16792	36.1897	1	0.247158	0.219217
GOTERM_BP_DIRECT	GO:0061419~positive regulation of transcription from RNA polymerase II promoter in response to hypoxia	2	0.862069	0.0539058	MAPK1, MAPK3	232	4	16792	36.1897	1	0.247158	0.219217
GOTERM_BP_DIRECT	GO:0006084~acetyl-CoA metabolic process	2	0.862069	0.0539058	CHRM3, CHRM1	232	4	16792	36.1897	1	0.247158	0.219217
GOTERM_BP_DIRECT	GO:0007258~JUN phosphorylation	2	0.862069	0.0539058	CDKN1A, HIF1A	232	4	16792	36.1897	1	0.247158	0.219217
GOTERM_BP_DIRECT	GO:0071322~cellular response to carbohydrate stimulus	2	0.862069	0.0539058	HIF1A, VEGFA	232	4	16792	36.1897	1	0.247158	0.219217
GOTERM_BP_DIRECT	GO:1900015~regulation of cytokine production involved in inflammatory response	2	0.862069	0.0539058	PRKCB, MYC	232	4	16792	36.1897	1	0.247158	0.219217
GOTERM_BP_DIRECT	GO:0060571~morphogenesis of an epithelial fold	2	0.862069	0.0539058	ADRB2, PTGS2	232	4	16792	36.1897	1	0.247158	0.219217
GOTERM_BP_DIRECT	GO:0042159~lipoprotein catabolic process	2	0.862069	0.0539058	E2F1, E2F2	232	4	16792	36.1897	1	0.247158	0.219217
GOTERM_BP_DIRECT	GO:0045964~positive regulation of dopamine metabolic process	2	0.862069	0.0539058	AR, EGFR	232	4	16792	36.1897	1	0.247158	0.219217
GOTERM_BP_DIRECT	GO:0045191~regulation of isotype switching	2	0.862069	0.0539058	POR, CYP1A1	232	4	16792	36.1897	1	0.247158	0.219217
GOTERM_BP_DIRECT	GO:0010574~regulation of vascular endothelial growth factor production	2	0.862069	0.0539058	AKR1C1, AKR1C3	232	4	16792	36.1897	1	0.247158	0.219217
GOTERM_BP_DIRECT	GO:0070849~response to epidermal growth factor	2	0.862069	0.0539058	IL1B, TNF	232	4	16792	36.1897	1	0.247158	0.219217
GOTERM_BP_DIRECT	GO:0010918~positive regulation of mitochondrial membrane potential	2	0.862069	0.0539058	IKBKB, TNF	232	4	16792	36.1897	1	0.247158	0.219217
GOTERM_BP_DIRECT	GO:0090170~regulation of Golgi inheritance	2	0.862069	0.0539058	MAOB, ABAT	232	4	16792	36.1897	1	0.247158	0.219217
GOTERM_BP_DIRECT	GO:0071395~cellular response to jasmonic acid stimulus	2	0.862069	0.0539058	APOB, SIRT1	232	4	16792	36.1897	1	0.247158	0.219217
GOTERM_BP_DIRECT	GO:0033158~regulation of protein import into nucleus, translocation	2	0.862069	0.0539058	MAPK1, MAPK3	232	4	16792	36.1897	1	0.247158	0.219217
GOTERM_BP_DIRECT	GO:1903347~negative regulation of bicellular tight junction assembly	2	0.862069	0.0539058	CYP1A2, CYP1A1	232	4	16792	36.1897	1	0.247158	0.219217
GOTERM_BP_DIRECT	GO:0006642~triglyceride mobilization	2	0.862069	0.0539058	CDKN1A, SIRT1	232	4	16792	36.1897	1	0.247158	0.219217
GOTERM_BP_DIRECT	GO:0002677~negative regulation of chronic inflammatory response	2	0.862069	0.0539058	IL1B, CAV1	232	4	16792	36.1897	1	0.247158	0.219217
GOTERM_BP_DIRECT	GO:0060355~positive regulation of cell adhesion molecule production	2	0.862069	0.0539058	ERBB3, EGF	232	4	16792	36.1897	1	0.247158	0.219217
GOTERM_BP_DIRECT	GO:0045986~negative regulation of smooth muscle contraction	2	0.862069	0.0539058	EGF, HAS2	232	4	16792	36.1897	1	0.247158	0.219217
GOTERM_BP_DIRECT	GO:2000481~positive regulation of cAMP-dependent protein kinase activity	2	0.862069	0.0539058	HSD3B2, HSD3B1	232	4	16792	36.1897	1	0.247158	0.219217
GOTERM_BP_DIRECT	GO:0030730~sequestering of triglyceride	2	0.862069	0.0539058	ADIPOQ, SIRT1	232	4	16792	36.1897	1	0.247158	0.219217
GOTERM_BP_DIRECT	GO:0018916~nitrobenzene metabolic process	2	0.862069	0.0539058	MAPK10, MAPK8	232	4	16792	36.1897	1	0.247158	0.219217
GOTERM_BP_DIRECT	GO:1990086~lens fiber cell apoptotic process	2	0.862069	0.0539058	GSTM2, GSTM1	232	4	16792	36.1897	1	0.247158	0.219217
GOTERM_BP_DIRECT	GO:1900127~positive regulation of hyaluronan biosynthetic process	2	0.862069	0.0539058	BAD, MYC	232	4	16792	36.1897	1	0.247158	0.219217
GOTERM_BP_DIRECT	GO:0006705~mineralocorticoid biosynthetic process	2	0.862069	0.0539058	DPP4, TGFB1	232	4	16792	36.1897	1	0.247158	0.219217
GOTERM_BP_DIRECT	GO:0070988~demethylation	2	0.862069	0.0539058	APOB, LDLR	232	4	16792	36.1897	1	0.247158	0.219217
GOTERM_BP_DIRECT	GO:0006778~porphyrin-containing compound metabolic process	2	0.862069	0.0539058	FASN, ACACA	232	4	16792	36.1897	1	0.247158	0.219217
GOTERM_BP_DIRECT	GO:0051048~negative regulation of secretion	2	0.862069	0.0539058	IL4, CYP19A1	232	4	16792	36.1897	1	0.247158	0.219217
GOTERM_BP_DIRECT	GO:0003056~regulation of vascular smooth muscle contraction	2	0.862069	0.0539058	IL10, IL4	232	4	16792	36.1897	1	0.247158	0.219217
GOTERM_BP_DIRECT	GO:0010716~negative regulation of extracellular matrix disassembly	2	0.862069	0.0539058	NOS2, MAPK14	232	4	16792	36.1897	1	0.247158	0.219217
GOTERM_BP_DIRECT	GO:0007586~digestion	4	1.72414	0.0558992	PTGS2, SELE, ESR1, RELA	232	63	16792	4.59551	1	0.255426	0.22655
GOTERM_BP_DIRECT	GO:0050727~regulation of inflammatory response	4	1.72414	0.0558992	PRSS1, UGT1A1, AKR1C1, CTRB1	232	63	16792	4.59551	1	0.255426	0.22655
GOTERM_BP_DIRECT	GO:0086010~membrane depolarization during action potential	3	1.2931	0.0563589	EGF, MYC, MMP9	232	28	16792	7.75493	1	0.255426	0.22655
GOTERM_BP_DIRECT	GO:0009314~response to radiation	3	1.2931	0.0563589	KCNH2, SCN5A, CACNA1S	232	28	16792	7.75493	1	0.255426	0.22655
GOTERM_BP_DIRECT	GO:0035666~TRIF-dependent toll-like receptor signaling pathway	3	1.2931	0.0563589	IL10, CHRNA7, TNF	232	28	16792	7.75493	1	0.255426	0.22655
GOTERM_BP_DIRECT	GO:0032715~negative regulation of interleukin-6 production	3	1.2931	0.0563589	IKBKB, CASP8, CHUK	232	28	16792	7.75493	1	0.255426	0.22655
GOTERM_BP_DIRECT	GO:0043388~positive regulation of DNA binding	3	1.2931	0.0563589	JUN, BCL2, OPRM1	232	28	16792	7.75493	1	0.255426	0.22655
GOTERM_BP_DIRECT	GO:0051973~positive regulation of telomerase activity	3	1.2931	0.0599994	BCL2, TP53, NFE2L2	232	29	16792	7.48751	1	0.271032	0.240392
GOTERM_BP_DIRECT	GO:0042149~cellular response to glucose starvation	3	1.2931	0.0599994	MYC, MAPK1, MAPK3	232	29	16792	7.48751	1	0.271032	0.240392
GOTERM_BP_DIRECT	GO:0060326~cell chemotaxis	4	1.72414	0.0602918	CXCL10, VCAM1, CCL2, CXCL2	232	65	16792	4.45411	1	0.271906	0.241167
GOTERM_BP_DIRECT	GO:0018108~peptidyl-tyrosine phosphorylation	6	2.58621	0.0604282	ERBB3, EGF, INSR, ERBB2, KDR, EGFR	232	153	16792	2.8384	1	0.272075	0.241317
GOTERM_BP_DIRECT	GO:0006351~transcription, DNA-templated	36	15.5172	0.0619201	RB1, NR1I3, NR1I2, AHR, HIF1A, NR3C2, RXRB, RXRA, CCND1, CHEK2, ERBB2, HSF1, E2F1, MAPK1, RXRG, NKX3-1, MAPK3, RUNX1T1, NCOA1, NCOA2, CDKN2A, PRKCB, STAT1, STAT3, MAPK14, ESR1, SIRT1, ESR2, FOSL2, AR, BIRC5, PPARG, PGR, TP53, PPARD, NFE2L2	232	1955	16792	1.33282	1	0.278337	0.246871
GOTERM_BP_DIRECT	GO:0030183~B cell differentiation	4	1.72414	0.0625471	IL10, IL4, VCAM1, CD40LG	232	66	16792	4.38662	1	0.280697	0.248964
GOTERM_BP_DIRECT	GO:0042572~retinol metabolic process	3	1.2931	0.0637184	BAX, AKT1, BCL2L1	232	30	16792	7.23793	1	0.284561	0.252391
GOTERM_BP_DIRECT	GO:0007281~germ cell development	3	1.2931	0.0637184	COL1A1, TGFB1, MMP2	232	30	16792	7.23793	1	0.284561	0.252391
GOTERM_BP_DIRECT	GO:0060325~face morphogenesis	3	1.2931	0.0637184	AKR1C3, CYP1B1, PLB1	232	30	16792	7.23793	1	0.284561	0.252391
GOTERM_BP_DIRECT	GO:0033088~negative regulation of immature T cell proliferation in thymus	2	0.862069	0.0669239	CCNA2, TGFB1	232	5	16792	28.9517	1	0.288119	0.255547
GOTERM_BP_DIRECT	GO:0035509~negative regulation of myosin-light-chain-phosphatase activity	2	0.862069	0.0669239	IL10, IL4	232	5	16792	28.9517	1	0.288119	0.255547
GOTERM_BP_DIRECT	GO:1904385~cellular response to angiotensin	2	0.862069	0.0669239	NFKBIA, RELA	232	5	16792	28.9517	1	0.288119	0.255547
GOTERM_BP_DIRECT	GO:0045542~positive regulation of cholesterol biosynthetic process	2	0.862069	0.0669239	SCN5A, ADRA1A	232	5	16792	28.9517	1	0.288119	0.255547
GOTERM_BP_DIRECT	GO:0016101~diterpenoid metabolic process	2	0.862069	0.0669239	SREBF1, CAV1	232	5	16792	28.9517	1	0.288119	0.255547
GOTERM_BP_DIRECT	GO:0031325~positive regulation of cellular metabolic process	2	0.862069	0.0669239	CD40LG, TNF	232	5	16792	28.9517	1	0.288119	0.255547
GOTERM_BP_DIRECT	GO:0022614~membrane to membrane docking	2	0.862069	0.0669239	CXCL8, CAV1	232	5	16792	28.9517	1	0.288119	0.255547
GOTERM_BP_DIRECT	GO:0006706~steroid catabolic process	2	0.862069	0.0669239	CHRM3, CHRM1	232	5	16792	28.9517	1	0.288119	0.255547
GOTERM_BP_DIRECT	GO:0070431~nucleotide-binding oligomerization domain containing 2 signaling pathway	2	0.862069	0.0669239	SLC6A2, SLC6A3	232	5	16792	28.9517	1	0.288119	0.255547
GOTERM_BP_DIRECT	GO:0045760~positive regulation of action potential	2	0.862069	0.0669239	VCAM1, ICAM1	232	5	16792	28.9517	1	0.288119	0.255547
GOTERM_BP_DIRECT	GO:2000467~positive regulation of glycogen (starch) synthase activity	2	0.862069	0.0669239	MYC, HSF1	232	5	16792	28.9517	1	0.288119	0.255547
GOTERM_BP_DIRECT	GO:0071466~cellular response to xenobiotic stimulus	2	0.862069	0.0669239	CDKN2A, ERBB2	232	5	16792	28.9517	1	0.288119	0.255547
GOTERM_BP_DIRECT	GO:0019217~regulation of fatty acid metabolic process	2	0.862069	0.0669239	RB1, E2F1	232	5	16792	28.9517	1	0.288119	0.255547
GOTERM_BP_DIRECT	GO:0051023~regulation of immunoglobulin secretion	2	0.862069	0.0669239	PPARG, PPARA	232	5	16792	28.9517	1	0.288119	0.255547
GOTERM_BP_DIRECT	GO:0051583~dopamine uptake involved in synaptic transmission	2	0.862069	0.0669239	CYP1A2, CYP3A4	232	5	16792	28.9517	1	0.288119	0.255547
GOTERM_BP_DIRECT	GO:0072656~maintenance of protein location in mitochondrion	2	0.862069	0.0669239	IKBKB, TNF	232	5	16792	28.9517	1	0.288119	0.255547
GOTERM_BP_DIRECT	GO:0033591~response to L-ascorbic acid	2	0.862069	0.0669239	SREBF1, POR	232	5	16792	28.9517	1	0.288119	0.255547
GOTERM_BP_DIRECT	GO:0099565~chemical synaptic transmission, postsynaptic	2	0.862069	0.0669239	FASN, ACACA	232	5	16792	28.9517	1	0.288119	0.255547
GOTERM_BP_DIRECT	GO:2000535~regulation of entry of bacterium into host cell	2	0.862069	0.0669239	ADIPOQ, IGF2	232	5	16792	28.9517	1	0.288119	0.255547
GOTERM_BP_DIRECT	GO:0042092~type 2 immune response	2	0.862069	0.0669239	AKT1, HK2	232	5	16792	28.9517	1	0.288119	0.255547
GOTERM_BP_DIRECT	GO:1990314~cellular response to insulin-like growth factor stimulus	2	0.862069	0.0669239	GSK3B, AKT1	232	5	16792	28.9517	1	0.288119	0.255547
GOTERM_BP_DIRECT	GO:0046541~saliva secretion	2	0.862069	0.0669239	PDE3A, EGFR	232	5	16792	28.9517	1	0.288119	0.255547
GOTERM_BP_DIRECT	GO:0010891~negative regulation of sequestering of triglyceride	2	0.862069	0.0669239	GSTP1, CAT	232	5	16792	28.9517	1	0.288119	0.255547
GOTERM_BP_DIRECT	GO:0045765~regulation of angiogenesis	3	1.2931	0.0675131	SREBF1, PPP3CA, ADRA2A	232	31	16792	7.00445	1	0.289748	0.256992
GOTERM_BP_DIRECT	GO:0046676~negative regulation of insulin secretion	3	1.2931	0.0675131	IL6, ERBB2, HMOX1	232	31	16792	7.00445	1	0.289748	0.256992
GOTERM_BP_DIRECT	GO:0007186~G-protein coupled receptor signaling pathway	19	8.18966	0.0711267	CHRM2, OPRD1, CHRM3, CHRM1, CXCL8, INSR, PTGER3, AKR1C3, ADRA1D, ADRA1B, CXCL2, ADRA1A, PIK3CG, ADRA2A, CXCL10, CXCL11, CCL2, AKT1, PPARG	232	899	16792	1.52971	1	0.303506	0.269195
GOTERM_BP_DIRECT	GO:0006694~steroid biosynthetic process	3	1.2931	0.0713807	HTR3A, OPRM1, SLC6A3	232	32	16792	6.78556	1	0.303506	0.269195
GOTERM_BP_DIRECT	GO:0007259~JAK-STAT cascade	3	1.2931	0.0713807	NOS2, RELA, EGFR	232	32	16792	6.78556	1	0.303506	0.269195
GOTERM_BP_DIRECT	GO:0042177~negative regulation of protein catabolic process	3	1.2931	0.0713807	HSD3B2, HSD3B1, CYP19A1	232	32	16792	6.78556	1	0.303506	0.269195
GOTERM_BP_DIRECT	GO:0042100~B cell proliferation	3	1.2931	0.0713807	IL10, CD40LG, BCL2	232	32	16792	6.78556	1	0.303506	0.269195
GOTERM_BP_DIRECT	GO:0042220~response to cocaine	3	1.2931	0.0713807	STAT1, STAT3, CCL2	232	32	16792	6.78556	1	0.303506	0.269195
GOTERM_BP_DIRECT	GO:0051436~negative regulation of ubiquitin-protein ligase activity involved in mitotic cell cycle	4	1.72414	0.0743965	CCNB1, CDK2, PSMD3, CDK1	232	71	16792	4.07771	1	0.315841	0.280135
GOTERM_BP_DIRECT	GO:0070555~response to interleukin-1	3	1.2931	0.0753186	GSK3B, BCL2, BAX	232	33	16792	6.57994	1	0.317794	0.281867
GOTERM_BP_DIRECT	GO:0010634~positive regulation of epithelial cell migration	3	1.2931	0.0753186	JUN, IFNG, HIF1A	232	33	16792	6.57994	1	0.317794	0.281867
GOTERM_BP_DIRECT	GO:0002931~response to ischemia	3	1.2931	0.0753186	PRKCA, SELE, RELA	232	33	16792	6.57994	1	0.317794	0.281867
GOTERM_BP_DIRECT	GO:0070059~intrinsic apoptotic signaling pathway in response to endoplasmic reticulum stress	3	1.2931	0.0753186	CAV1, BCL2, HK2	232	33	16792	6.57994	1	0.317794	0.281867
GOTERM_BP_DIRECT	GO:0001837~epithelial to mesenchymal transition	3	1.2931	0.079324	GSK3B, TGFB1, HIF1A	232	34	16792	6.38641	1	0.321745	0.285371
GOTERM_BP_DIRECT	GO:0043330~response to exogenous dsRNA	3	1.2931	0.079324	CXCL10, CDK4, SOD1	232	34	16792	6.38641	1	0.321745	0.285371
GOTERM_BP_DIRECT	GO:0045859~regulation of protein kinase activity	3	1.2931	0.079324	PTPN1, ERBB3, IGFBP3	232	34	16792	6.38641	1	0.321745	0.285371
GOTERM_BP_DIRECT	GO:0009968~negative regulation of signal transduction	3	1.2931	0.079324	NFKBIA, MAPK1, MAPK3	232	34	16792	6.38641	1	0.321745	0.285371
GOTERM_BP_DIRECT	GO:0007049~cell cycle	7	3.01724	0.0796061	CCND1, PIM1, MAPK1, E2F2, AHR, TP53, MAPK3	232	217	16792	2.33482	1	0.321745	0.285371
GOTERM_BP_DIRECT	GO:0060179~male mating behavior	2	0.862069	0.0797637	CRP, HMGCR	232	6	16792	24.1264	1	0.321745	0.285371
GOTERM_BP_DIRECT	GO:0046321~positive regulation of fatty acid oxidation	2	0.862069	0.0797637	MAPK1, MAPK3	232	6	16792	24.1264	1	0.321745	0.285371
GOTERM_BP_DIRECT	GO:0032873~negative regulation of stress-activated MAPK cascade	2	0.862069	0.0797637	STAT3, SIRT1	232	6	16792	24.1264	1	0.321745	0.285371
GOTERM_BP_DIRECT	GO:0007253~cytoplasmic sequestering of NF-kappaB	2	0.862069	0.0797637	MYC, STAT3	232	6	16792	24.1264	1	0.321745	0.285371
GOTERM_BP_DIRECT	GO:2001171~positive regulation of ATP biosynthetic process	2	0.862069	0.0797637	GJA1, KDR	232	6	16792	24.1264	1	0.321745	0.285371
GOTERM_BP_DIRECT	GO:0002740~negative regulation of cytokine secretion involved in immune response	2	0.862069	0.0797637	CYP1A1, CYP3A4	232	6	16792	24.1264	1	0.321745	0.285371
GOTERM_BP_DIRECT	GO:0009299~mRNA transcription	2	0.862069	0.0797637	MYC, GSTP1	232	6	16792	24.1264	1	0.321745	0.285371
GOTERM_BP_DIRECT	GO:0090336~positive regulation of brown fat cell differentiation	2	0.862069	0.0797637	IL10, NFKBIA	232	6	16792	24.1264	1	0.321745	0.285371
GOTERM_BP_DIRECT	GO:0060440~trachea formation	2	0.862069	0.0797637	PDE3A, SLC6A4	232	6	16792	24.1264	1	0.321745	0.285371
GOTERM_BP_DIRECT	GO:0045908~negative regulation of vasodilation	2	0.862069	0.0797637	COL1A1, MMP2	232	6	16792	24.1264	1	0.321745	0.285371
GOTERM_BP_DIRECT	GO:0031536~positive regulation of exit from mitosis	2	0.862069	0.0797637	CYP1A1, CCL2	232	6	16792	24.1264	1	0.321745	0.285371
GOTERM_BP_DIRECT	GO:0042737~drug catabolic process	2	0.862069	0.0797637	TGFB1, IL2	232	6	16792	24.1264	1	0.321745	0.285371
GOTERM_BP_DIRECT	GO:0002933~lipid hydroxylation	2	0.862069	0.0797637	IL10, TNF	232	6	16792	24.1264	1	0.321745	0.285371
GOTERM_BP_DIRECT	GO:0030816~positive regulation of cAMP metabolic process	2	0.862069	0.0797637	AKT1, HK2	232	6	16792	24.1264	1	0.321745	0.285371
GOTERM_BP_DIRECT	GO:0045591~positive regulation of regulatory T cell differentiation	2	0.862069	0.0797637	TGFB1, BIRC5	232	6	16792	24.1264	1	0.321745	0.285371
GOTERM_BP_DIRECT	GO:0010887~negative regulation of cholesterol storage	2	0.862069	0.0797637	HMOX1, HIF1A	232	6	16792	24.1264	1	0.321745	0.285371
GOTERM_BP_DIRECT	GO:0016098~monoterpenoid metabolic process	2	0.862069	0.0797637	HSF1, PPARD	232	6	16792	24.1264	1	0.321745	0.285371
GOTERM_BP_DIRECT	GO:0072655~establishment of protein localization to mitochondrion	2	0.862069	0.0797637	FOS, DRD1	232	6	16792	24.1264	1	0.321745	0.285371
GOTERM_BP_DIRECT	GO:0043619~regulation of transcription from RNA polymerase II promoter in response to oxidative stress	2	0.862069	0.0797637	PPARG, PPARA	232	6	16792	24.1264	1	0.321745	0.285371
GOTERM_BP_DIRECT	GO:0003158~endothelium development	2	0.862069	0.0797637	CYP1A2, CYP3A4	232	6	16792	24.1264	1	0.321745	0.285371
GOTERM_BP_DIRECT	GO:0071321~cellular response to cGMP	2	0.862069	0.0797637	MAPK14, PTGS2	232	6	16792	24.1264	1	0.321745	0.285371
GOTERM_BP_DIRECT	GO:0033210~leptin-mediated signaling pathway	2	0.862069	0.0797637	CYP1A2, CYP3A4	232	6	16792	24.1264	1	0.321745	0.285371
GOTERM_BP_DIRECT	GO:0001957~intramembranous ossification	2	0.862069	0.0797637	PPARG, PPARA	232	6	16792	24.1264	1	0.321745	0.285371
GOTERM_BP_DIRECT	GO:0001661~conditioned taste aversion	2	0.862069	0.0797637	NCOA1, PTEN	232	6	16792	24.1264	1	0.321745	0.285371
GOTERM_BP_DIRECT	GO:0060137~maternal process involved in parturition	2	0.862069	0.0797637	CXCL10, CXCL11	232	6	16792	24.1264	1	0.321745	0.285371
GOTERM_BP_DIRECT	GO:0033209~tumor necrosis factor-mediated signaling pathway	5	2.15517	0.0800226	IKBKB, CD40LG, STAT1, PSMD3, TNF	232	118	16792	3.06692	1	0.321845	0.285461
GOTERM_BP_DIRECT	GO:0044267~cellular protein metabolic process	5	2.15517	0.0800226	BACE1, MMP1, MMP2, IGFBP3, IGF2	232	118	16792	3.06692	1	0.321845	0.285461
GOTERM_BP_DIRECT	GO:0008152~metabolic process	6	2.58621	0.0827487	GSTM2, GSTM1, UGT1A1, FASN, GSTP1, CES1	232	168	16792	2.58498	1	0.332324	0.294754
GOTERM_BP_DIRECT	GO:0040018~positive regulation of multicellular organism growth	3	1.2931	0.0833943	HSF1, BCL2, SLC6A3	232	35	16792	6.20394	1	0.332972	0.29533
GOTERM_BP_DIRECT	GO:0006641~triglyceride metabolic process	3	1.2931	0.0833943	KCNH2, CAV1, SCN5A	232	35	16792	6.20394	1	0.332972	0.29533
GOTERM_BP_DIRECT	GO:0001890~placenta development	3	1.2931	0.0833943	PPARG, MAPK14, SOD1	232	35	16792	6.20394	1	0.332972	0.29533
GOTERM_BP_DIRECT	GO:0086091~regulation of heart rate by cardiac conduction	3	1.2931	0.0833943	CAV1, MTTP, CAT	232	35	16792	6.20394	1	0.332972	0.29533
GOTERM_BP_DIRECT	GO:0006357~regulation of transcription from RNA polymerase II promoter	11	4.74138	0.0843744	RB1, SREBF1, PRKCB, STAT3, FOS, AHR, MAPK14, RUNX2, FOSL2, PPARD, VEGFA	232	441	16792	1.80538	1	0.336397	0.298367
GOTERM_BP_DIRECT	GO:0048469~cell maturation	3	1.2931	0.0875272	BCL2, AKT1, BCL2L1	232	36	16792	6.03161	1	0.346456	0.30729
GOTERM_BP_DIRECT	GO:0010507~negative regulation of autophagy	3	1.2931	0.0875272	VCAM1, CA2, PTEN	232	36	16792	6.03161	1	0.346456	0.30729
GOTERM_BP_DIRECT	GO:0007611~learning or memory	3	1.2931	0.0875272	PPARG, RUNX2, VEGFA	232	36	16792	6.03161	1	0.346456	0.30729
GOTERM_BP_DIRECT	GO:0050714~positive regulation of protein secretion	3	1.2931	0.0875272	CASP3, PTEN, EGFR	232	36	16792	6.03161	1	0.346456	0.30729
GOTERM_BP_DIRECT	GO:0010043~response to zinc ion	3	1.2931	0.0875272	IL1A, ACHE, TGFB1	232	36	16792	6.03161	1	0.346456	0.30729
GOTERM_BP_DIRECT	GO:0051898~negative regulation of protein kinase B signaling	3	1.2931	0.09172	NCOA1, ABAT, SCN5A	232	37	16792	5.86859	1	0.354439	0.31437
GOTERM_BP_DIRECT	GO:0021549~cerebellum development	3	1.2931	0.09172	PTEN, SIRT1, XDH	232	37	16792	5.86859	1	0.354439	0.31437
GOTERM_BP_DIRECT	GO:0043496~regulation of protein homodimerization activity	2	0.862069	0.0924275	BCL2, BAX	232	7	16792	20.6798	1	0.354439	0.31437
GOTERM_BP_DIRECT	GO:0071312~cellular response to alkaloid	2	0.862069	0.0924275	IFNG, PTEN	232	7	16792	20.6798	1	0.354439	0.31437
GOTERM_BP_DIRECT	GO:0035357~peroxisome proliferator activated receptor signaling pathway	2	0.862069	0.0924275	GJA1, SCN5A	232	7	16792	20.6798	1	0.354439	0.31437
GOTERM_BP_DIRECT	GO:0042908~xenobiotic transport	2	0.862069	0.0924275	RXRA, PPARG	232	7	16792	20.6798	1	0.354439	0.31437
GOTERM_BP_DIRECT	GO:0042178~xenobiotic catabolic process	2	0.862069	0.0924275	CHRM1, CHRM4	232	7	16792	20.6798	1	0.354439	0.31437
GOTERM_BP_DIRECT	GO:0001844~protein insertion into mitochondrial membrane involved in apoptotic signaling pathway	2	0.862069	0.0924275	RXRA, ESR1	232	7	16792	20.6798	1	0.354439	0.31437
GOTERM_BP_DIRECT	GO:0031642~negative regulation of myelination	2	0.862069	0.0924275	TGFB1, HAS2	232	7	16792	20.6798	1	0.354439	0.31437
GOTERM_BP_DIRECT	GO:0040012~regulation of locomotion	2	0.862069	0.0924275	IL1B, HAS2	232	7	16792	20.6798	1	0.354439	0.31437
GOTERM_BP_DIRECT	GO:0060373~regulation of ventricular cardiac muscle cell membrane depolarization	2	0.862069	0.0924275	TGFB1, EGFR	232	7	16792	20.6798	1	0.354439	0.31437
GOTERM_BP_DIRECT	GO:0042167~heme catabolic process	2	0.862069	0.0924275	NR1I2, ABCG2	232	7	16792	20.6798	1	0.354439	0.31437
GOTERM_BP_DIRECT	GO:0032287~peripheral nervous system myelin maintenance	2	0.862069	0.0924275	BCL2L1, ICAM1	232	7	16792	20.6798	1	0.354439	0.31437
GOTERM_BP_DIRECT	GO:0030213~hyaluronan biosynthetic process	2	0.862069	0.0924275	UGT1A1, HMOX1	232	7	16792	20.6798	1	0.354439	0.31437
GOTERM_BP_DIRECT	GO:0034351~negative regulation of glial cell apoptotic process	2	0.862069	0.0924275	NOS3, SIRT1	232	7	16792	20.6798	1	0.354439	0.31437
GOTERM_BP_DIRECT	GO:0060687~regulation of branching involved in prostate gland morphogenesis	2	0.862069	0.0924275	HAS2, MMP9	232	7	16792	20.6798	1	0.354439	0.31437
GOTERM_BP_DIRECT	GO:0090050~positive regulation of cell migration involved in sprouting angiogenesis	2	0.862069	0.0924275	GSTM2, GSTM1	232	7	16792	20.6798	1	0.354439	0.31437
GOTERM_BP_DIRECT	GO:0001542~ovulation from ovarian follicle	2	0.862069	0.0924275	PTGS2, VEGFA	232	7	16792	20.6798	1	0.354439	0.31437
GOTERM_BP_DIRECT	GO:0071455~cellular response to hyperoxia	2	0.862069	0.0924275	BAD, BAX	232	7	16792	20.6798	1	0.354439	0.31437
GOTERM_BP_DIRECT	GO:0085029~extracellular matrix assembly	2	0.862069	0.0924275	CAV1, PPARG	232	7	16792	20.6798	1	0.354439	0.31437
GOTERM_BP_DIRECT	GO:0007435~salivary gland morphogenesis	2	0.862069	0.0924275	AKT1, SOD1	232	7	16792	20.6798	1	0.354439	0.31437
GOTERM_BP_DIRECT	GO:0051549~positive regulation of keratinocyte migration	2	0.862069	0.0924275	CCL2, PRKCA	232	7	16792	20.6798	1	0.354439	0.31437
GOTERM_BP_DIRECT	GO:0031295~T cell costimulation	4	1.72414	0.0925072	DPP4, CD40LG, CAV1, AKT1	232	78	16792	3.71176	1	0.354439	0.31437
GOTERM_BP_DIRECT	GO:0060291~long-term synaptic potentiation	3	1.2931	0.0959703	PTEN, MAPK1, DRD1	232	38	16792	5.71416	1	0.367197	0.325685
GOTERM_BP_DIRECT	GO:0046718~viral entry into host cell	4	1.72414	0.0979874	DPP4, HTR2A, LDLR, ICAM1	232	80	16792	3.61897	1	0.374394	0.332069
GOTERM_BP_DIRECT	GO:0006811~ion transport	5	2.15517	0.0982648	GABRA2, GABRA1, CHRNA2, CHRNA7, HTR3A	232	127	16792	2.84958	1	0.374933	0.332546
GOTERM_BP_DIRECT	GO:0050776~regulation of immune response	6	2.58621	0.0996802	COL1A1, IL4, VCAM1, CD40LG, IRF1, ICAM1	232	178	16792	2.43975	1	0.379806	0.336869

## Sheet: SJZT-FDR<0.5 CC
Category	Term	Count	%	PValue	Genes	List Total	Pop Hits	Pop Total	Fold Enrichment	Bonferroni	Benjamini	FDR
GOTERM_CC_DIRECT	GO:0005615~extracellular space	56	24.1379	4.28359e-15	ACHE, CXCL8, SERPINE1, AKR1B1, HSPB1, PLAT, MPO, TNF, CXCL2, ICAM1, THBD, PLAU, CA2, CHEK1, CTSD, IL10, IGFBP3, MMP2, ADIPOQ, MMP3, CTRB1, PCOLCE, MMP9, F3, IL1A, F7, IFNG, SLPI, IL1B, CAT, CES1, CRP, GSTP1, PON1, EGFR, ERBB3, ALOX5, SPP1, CCL2, HMOX1, APOB, XDH, TGFB1, VCAM1, EGF, IGF2, SELE, IL2, SOD1, VEGFA, IL4, COL1A1, CXCL10, CXCL11, IL6, CD40LG	232	1347	18224	3.2657	1.35092e-12	1.33648e-12	1.15228e-12
GOTERM_CC_DIRECT	GO:0005829~cytosol	91	39.2241	7.75082e-14	GSK3B, CDKN1A, NCF1, PTEN, AKR1B1, HSPB1, PYGM, HTR2A, SLC2A4, HK2, PIK3CG, SLC6A4, CASP9, IKBKB, HERC5, PPP3CA, NPEPPS, GJA1, CASP8, CCND1, CA2, MYC, CASP3, PSMD3, CHEK1, AKT1, SREBF1, CHUK, PRKCB, AHSA1, PRKCA, FOS, IL1A, AR, RASA1, IRF1, IL1B, CAT, BIRC5, PPARG, RAF1, TP53, CES1, ADH1C, ADH1B, GSTP1, NR1I3, ODC1, HIF1A, ACACA, RELA, MAPK8, CCNB1, SULT1E1, ALOX5, HSF1, HMOX1, MAPK1, LTA4H, APOB…	232	3315	18224	2.15632	2.4178e-11	1.20913e-11	1.04248e-11
GOTERM_CC_DIRECT	GO:0045121~membrane raft	20	8.62069	1.70496e-11	OPRD1, CAV1, SLC2A4, OPRM1, SELE, SLC6A2, TNF, SLC6A3, EGFR, SLC6A4, ICAM1, BACE1, DPP4, IKBKB, GJA1, CASP8, CASP3, KDR, OLR1, CTSD	232	206	18224	7.62638	5.3195e-09	1.77316e-09	1.52879e-09
GOTERM_CC_DIRECT	GO:0005886~plasma membrane	95	40.9483	4.87125e-10	CHRM2, ACHE, CHRM3, GSK3B, CHRM1, CHRM4, SERPINE1, CHRM5, PTEN, HSPB1, ADRA1D, HTR2A, SLC2A4, ADRA1B, SLC6A2, ADRA1A, TNF, SLC6A3, PLB1, PIK3CG, SLC6A4, ICAM1, THBD, NPEPPS, GJA1, RASSF1, PLAU, CA2, CASP3, PIM1, KDR, AKT1, OLR1, SCN5A, KCNH2, ABCC1, PRKCB, MMP2, DIO1, HTR3A, PRKCA, OPRM1, F3, ADRA2A, BACE1, F7, AR, CLDN4, KCNMA1, CAT, RAF1, ABCG2, OPRD1, GRIA2, CHRNA2, GSTP1, CHRNA7, PTGER3, ADRB…	232	4121	18224	1.81083	1.51983e-07	3.79958e-08	3.27592e-08
GOTERM_CC_DIRECT	GO:0005901~caveola	11	4.74138	8.57518e-09	NOS3, CAV1, INSR, KCNMA1, HMOX1, MAPK1, SCN5A, HTR2A, PTGS2, SELE, MAPK3	232	65	18224	13.2934	2.67545e-06	5.35091e-07	4.61345e-07
GOTERM_CC_DIRECT	GO:0005739~mitochondrion	43	18.5345	3.25216e-08	GSK3B, MAOB, MAOA, GSTP1, PTEN, ABAT, DCAF5, MPO, ELK1, ACACA, CASP9, PPP3CA, GJA1, MAPK8, CASP8, MYC, E2F1, CYP1B1, AKT1, MAPK1, MAPK3, RUNX1T1, PARP1, GOT1, CDKN2A, BAD, MMP2, GSR, PRKCA, MAPK14, SIRT1, ESR2, SOD1, MAPK10, POR, FASN, CAT, CYP1A1, BCL2, CDK1, BAX, TP53, BCL2L1	232	1331	18224	2.53773	1.01467e-05	1.69112e-06	1.45805e-06
GOTERM_CC_DIRECT	GO:0005654~nucleoplasm	68	29.3103	7.01847e-08	RB1, TOP2A, CDKN1A, PTEN, AKR1B1, AHR, ELK1, NR3C2, PPP3CA, CASP8, CCND1, MYC, CHEK2, CASP3, PSMD3, CHEK1, AKT1, OLR1, NCOA1, NCOA2, SREBF1, PARP1, CHUK, PRKCB, PRKCA, FOS, SIRT1, RUNX2, CCNA2, AR, IRF1, BIRC5, PPARG, PGR, TOP1, PPARA, TP53, PPARD, NR1I3, NR1I2, HIF1A, RELA, RXRB, MAPK8, CCNB1, RXRA, HSF1, E2F1, E2F2, MAPK1, LTA4H, RXRG, MAPK3, RUNX1T1, JUN, CDKN2A, STAT1, STAT3, MAPK14, ESR1, ES…	232	2784	18224	1.91865	2.18974e-05	3.12823e-06	2.6971e-06
GOTERM_CC_DIRECT	GO:0045211~postsynaptic membrane	16	6.89655	8.32132e-08	CHRM2, OPRD1, GABRA2, CHRM3, GRIA2, GABRA1, CHRM1, CHRNA2, GABRA6, GABRA5, CHRM4, CHRNA7, CHRM5, GABRA3, PTEN, HTR3A	232	211	18224	5.95653	2.59622e-05	3.24532e-06	2.79804e-06
GOTERM_CC_DIRECT	GO:0043235~receptor complex	12	5.17241	6.5507e-07	RXRA, ERBB3, EGF, INSR, ERBB2, MTTP, OLR1, ADRB2, LDLR, EGFR, ADRA2A, NR3C2	232	127	18224	7.42221	0.000204361	2.27091e-05	1.95793e-05
GOTERM_CC_DIRECT	GO:0005887~integral component of plasma membrane	41	17.6724	1.27397e-06	CHRM2, OPRD1, GRIA2, CHRM3, CHRM1, CHRM4, PTGER3, CHRM5, ADRA1D, ADRB1, ADRB2, HTR2A, SLC2A4, ADRA1B, SLC6A2, ADRA1A, TNF, SLC6A3, SLC6A4, ICAM1, THBD, GJA1, ERBB3, KDR, HAS2, OLR1, DRD1, LDLR, GABRA1, ABCC1, UGT1A1, GABRA6, GABRA5, CAV1, INSR, GABRA3, OPRM1, ADRA2A, BACE1, CLDN4, CD40LG	232	1415	18224	2.27606	0.000397401	3.9748e-05	3.42699e-05
GOTERM_CC_DIRECT	GO:0000790~nuclear chromatin	13	5.60345	6.77289e-06	NCOA1, STAT1, STAT3, ESR1, SIRT1, RELA, RUNX2, AR, RXRA, IRF1, E2F1, TP53, PPARD	232	193	18224	5.29105	0.00211092	0.000192104	0.000165628
GOTERM_CC_DIRECT	GO:0045202~synapse	12	5.17241	2.03649e-05	CHRM2, GABRA2, GABRA1, ACHE, CHRM3, CHRM1, GABRA6, GABRA5, CHRM4, CHRM5, CCL2, EGFR	232	181	18224	5.20785	0.00633377	0.000496613	0.00042817
GOTERM_CC_DIRECT	GO:0005741~mitochondrial outer membrane	11	4.74138	2.06922e-05	GJA1, CASP8, MAOB, MAOA, BAD, BCL2, BAX, PGR, RAF1, HK2, BCL2L1	232	149	18224	5.79912	0.00643525	0.000496613	0.00042817
GOTERM_CC_DIRECT	GO:0005576~extracellular region	41	17.6724	2.79107e-05	CRP, ACHE, PRSS1, CXCL8, PON1, SERPINE1, PTEN, PLAT, TNF, CXCL2, PLAU, KDR, SPP1, CCL2, APOB, CTSD, IL10, TGFB1, F10, MMP1, EGF, MMP2, IGFBP3, ADIPOQ, MMP3, CTRB1, IGF2, MMP9, IL2, ESR2, SOD1, VEGFA, IL4, COL1A1, IL1A, CXCL10, F7, CXCL11, IL6, IFNG, IL1B	232	1610	18224	2.00039	0.00867045	0.00062201	0.000536284
GOTERM_CC_DIRECT	GO:0043679~axon terminus	7	3.01724	3.05662e-05	CHRM2, OPRD1, CHRM3, CHRM1, GOT1, CCL2, ELK1	232	48	18224	11.4555	0.00949147	0.000635777	0.000548154
GOTERM_CC_DIRECT	GO:0070062~extracellular exosome	60	25.8621	4.29569e-05	PRSS1, SERPINE1, AKR1B1, HSPB1, ABAT, PYGM, PLAT, SLC2A4, MPO, ICAM1, NPEPPS, GJA1, PLAU, CA2, PSMD3, OLR1, CTSD, ABCC1, PRKCB, IGFBP3, ADIPOQ, AHSA1, PRKCA, PCOLCE, MMP9, F3, SLPI, IL1B, KCNMA1, CAT, CRP, MAOB, GSTP1, PON1, ACACA, PTGS1, DPP4, SPP1, MAPK1, LTA4H, APOB, DUOX2, MAPK3, NQO1, GSTM2, MGAM, VCAM1, GOT1, EGF, INSR, AKR1C1, GSR, IGF2, AKR1C3, MAPK14, SOD1, EIF6, FASN, CDK1, BAX	232	2811	18224	1.67666	0.0133134	0.00083766	0.000722214
GOTERM_CC_DIRECT	GO:0043005~neuron projection	13	5.60345	5.20573e-05	NCOA1, OPRD1, PTEN, ABAT, FOS, OPRM1, PTGS2, SLC6A2, SLC6A3, SLC6A4, CASP8, IFNG, MAP2	232	237	18224	4.30874	0.0161111	0.000955404	0.00082373
GOTERM_CC_DIRECT	GO:0009986~cell surface	20	8.62069	6.59337e-05	KCNH2, ACHE, TGFB1, VCAM1, ADIPOQ, PLAT, SLC6A2, F3, TNF, SLC6A3, EGFR, ICAM1, VEGFA, BACE1, DPP4, THBD, CD40LG, PLAU, SCN5A, LDLR	232	542	18224	2.89859	0.0203618	0.00109912	0.000947641
GOTERM_CC_DIRECT	GO:1902711~GABA-A receptor complex	5	2.15517	6.69337e-05	GABRA2, GABRA1, GABRA6, GABRA5, GABRA3	232	18	18224	21.8199	0.0206675	0.00109912	0.000947641
GOTERM_CC_DIRECT	GO:0030054~cell junction	18	7.75862	8.19654e-05	CHRM2, GABRA2, ACHE, CHRM3, GRIA2, GABRA1, CHRM1, CHRNA2, GABRA6, GABRA5, CHRM4, CHRNA7, CHRM5, GABRA3, HTR3A, KDR, DUOX2, BCL2L1	232	459	18224	3.08046	0.02525	0.00127866	0.00110243
GOTERM_CC_DIRECT	GO:0009897~external side of plasma membrane	12	5.17241	8.9857e-05	IL4, CXCL10, IL6, VCAM1, CD40LG, IFNG, CHRNA7, GSR, SLC2A4, TNF, LDLR, ICAM1	232	213	18224	4.42545	0.0276473	0.00130046	0.00112123
GOTERM_CC_DIRECT	GO:0016324~apical plasma membrane	14	6.03448	9.16991e-05	MGAM, CHRNA7, CAV1, PTEN, ADRB2, EGFR, PLB1, DPP4, GJA1, CLDN4, ERBB3, KCNMA1, ERBB2, DUOX2	232	291	18224	3.77912	0.028206	0.00130046	0.00112123
GOTERM_CC_DIRECT	GO:0005789~endoplasmic reticulum membrane	26	11.2069	0.000102251	GRIA2, HMGCR, CYP3A4, PTGS2, CYP19A1, EGFR, NR3C2, PTGS1, GJA1, CYP1B1, HMOX1, DRD1, APOB, SREBF1, UGT1A1, HSD3B2, CAV1, DIO1, HSD3B1, POR, SOAT1, SOAT2, CYP1A2, CYP1A1, BCL2, BAX	232	862	18224	2.36931	0.0314005	0.00138706	0.0011959
GOTERM_CC_DIRECT	GO:0098794~postsynapse	5	2.15517	0.000153759	GABRA2, GSK3B, PPP3CA, AKT1, OPRM1	232	22	18224	17.8527	0.0468437	0.00199886	0.00172338
GOTERM_CC_DIRECT	GO:0005634~nucleus	95	40.9483	0.000224147	RB1, TOP2A, ACHE, GSK3B, CDKN1A, PTEN, HSPB1, AHR, ADRA1B, MPO, ADRA1A, ELK1, NR3C2, CASP9, IKBKB, HERC5, PPP3CA, NPEPPS, RASSF1, CCND1, MYC, CASP3, PSMD3, CHEK1, PIM1, KDR, AKT1, NKX3-1, NCOA1, NCOA2, SREBF1, PARP1, PRKCB, IGFBP3, MMP2, FOS, SIRT1, RUNX2, CCNA2, AR, IRF1, BIRC5, PPARG, PGR, TOP1, RAF1, PPARA, TP53, ABCG2, PPARD, GSTP1, NR1I3, NR1I2, ADRB2, PTGS2, HIF1A, EGFR, RELA, PTGS1, RXRB, …	232	5415	18224	1.3781	0.0675518	0.00279735	0.00241182
GOTERM_CC_DIRECT	GO:0005783~endoplasmic reticulum	24	10.3448	0.000358884	SREBF1, PTPN1, VCAM1, UGT1A1, HSD3B2, CAV1, MTTP, ADIPOQ, AHSA1, PRKCA, FOS, HMGCR, OPRM1, PTGS2, CYP19A1, SOAT1, SOAT2, CAT, KDR, BCL2, BAX, HMOX1, SCN5A, TP53	232	828	18224	2.27686	0.105949	0.00430661	0.00371307
GOTERM_CC_DIRECT	GO:0048471~perinuclear region of cytoplasm	20	8.62069	0.000373653	KCNH2, ACHE, GSK3B, CDKN1A, NOS2, STAT1, CAV1, ODC1, AKR1B1, PRKCA, SLC2A4, SELE, EGFR, HERC5, CDK4, ERBB2, SPP1, CCL2, HMOX1, PPARG	232	621	18224	2.52985	0.11006	0.00431776	0.00372269
GOTERM_CC_DIRECT	GO:0016323~basolateral plasma membrane	10	4.31034	0.000495957	CHRM3, ABCC1, ERBB3, CA2, CAV1, ERBB2, MTTP, LDLR, EGFR, ADRA2A	232	180	18224	4.36398	0.143394	0.00552638	0.00476473
GOTERM_CC_DIRECT	GO:0005737~cytoplasm	90	38.7931	0.000721633	TOP2A, GSK3B, NCF1, PTEN, AKR1B1, HSPB1, PYGM, PLAT, AHR, SLC6A3, PIK3CG, IKBKB, HERC5, PPP3CA, RASSF1, CASP8, CCND1, CA2, CASP3, PSMD3, PIM1, AKT1, IL10, NCOA1, NCOA2, SREBF1, CHUK, PRKCB, AHSA1, HTR3A, PRKCA, SIRT1, ADRA2A, RUNX2, CCNA2, AR, IFNG, RASA1, IRF1, BIRC5, RAF1, TP53, OPRD1, GSTP1, NR1I3, ODC1, CYP3A4, PTGS2, HIF1A, ACACA, EGFR, RELA, PTGS1, CCNB1, MAP2, ERBB2, HSF1, MAPK1, HAS2, CAC…	232	5222	18224	1.35382	0.201668	0.00776378	0.00669377
GOTERM_CC_DIRECT	GO:0043234~protein complex	15	6.46552	0.000811916	TOP2A, SREBF1, CDKN1A, PARP1, CDKN2A, CAV1, PTGS2, SOD1, AR, MYC, HSF1, AKT1, MAPK1, TP53, MAPK3	232	412	18224	2.85989	0.223859	0.00797396	0.00687498
GOTERM_CC_DIRECT	GO:0000307~cyclin-dependent protein kinase holoenzyme complex	4	1.72414	0.000817237	CDKN1A, CCND1, CDK4, CDK2	232	15	18224	20.9471	0.225147	0.00797396	0.00687498
GOTERM_CC_DIRECT	GO:0005667~transcription factor complex	10	4.31034	0.000817842	JUN, PARP1, CDK4, CDK2, E2F2, FOS, AHR, HIF1A, RELA, RUNX2	232	193	18224	4.07004	0.225294	0.00797396	0.00687498
GOTERM_CC_DIRECT	GO:0031012~extracellular matrix	12	5.17241	0.00145074	COL1A1, TGFB1, SLPI, MMP1, MMP2, SERPINE1, HSPB1, PCOLCE, PLAT, CTSD, F3, SOD1	232	296	18224	3.18453	0.364256	0.0137161	0.0118257
GOTERM_CC_DIRECT	GO:0043025~neuronal cell body	12	5.17241	0.00235906	CHRM2, GABRA2, NQO1, GSK3B, TGFB1, NCF1, HTR3A, HTR2A, APOB, ELK1, SLC6A3, SOD1	232	315	18224	2.99245	0.521403	0.0216478	0.0186643
GOTERM_CC_DIRECT	GO:0005769~early endosome	10	4.31034	0.0026613	PTPN1, GJA1, VCAM1, KDR, MAPK1, ADRB1, ADRB2, APOB, LDLR, MAPK3	232	229	18224	3.43021	0.564575	0.0237236	0.020454
GOTERM_CC_DIRECT	GO:0034707~chloride channel complex	5	2.15517	0.00340938	GABRA2, GABRA1, GABRA6, GABRA5, GABRA3	232	49	18224	8.01548	0.655459	0.0295479	0.0254756
GOTERM_CC_DIRECT	GO:0032279~asymmetric synapse	3	1.2931	0.00425958	CHRM2, CHRM3, CHRM1	232	8	18224	29.4569	0.736006	0.0359186	0.0309683
GOTERM_CC_DIRECT	GO:0031090~organelle membrane	6	2.58621	0.00498655	CYP1A2, CYP1A1, CYP1B1, CYP3A4, PTGS2, PTGS1	232	87	18224	5.41736	0.7898	0.0409422	0.0352995
GOTERM_CC_DIRECT	GO:0031093~platelet alpha granule lumen	5	2.15517	0.00517381	TGFB1, EGF, SERPINE1, IGF2, VEGFA	232	55	18224	7.14107	0.801788	0.0413905	0.035686
GOTERM_CC_DIRECT	GO:0005794~Golgi apparatus	21	9.05172	0.00695085	ACHE, VCAM1, NCF1, MTTP, OPRM1, ESR1, PTGS1, BACE1, CCNA2, COL1A1, GJA1, CHEK2, FASN, CAT, KDR, MAPK1, PPARG, RAF1, APOB, LDLR, MAPK3	232	863	18224	1.91146	0.886532	0.0542166	0.0467445
GOTERM_CC_DIRECT	GO:0030424~axon	9	3.87931	0.00753938	BACE1, GABRA2, TGFB1, STAT1, CA2, MAPK1, HTR3A, HTR2A, SLC6A3	232	222	18224	3.18453	0.905693	0.0573728	0.0494657
GOTERM_CC_DIRECT	GO:0016605~PML body	6	2.58621	0.00819812	RB1, CHEK2, HSF1, PTEN, SIRT1, TP53	232	98	18224	4.80929	0.923338	0.0590444	0.0509068
GOTERM_CC_DIRECT	GO:0090575~RNA polymerase II transcription factor complex	4	1.72414	0.00828736	RXRA, STAT3, PPARG, HIF1A	232	33	18224	9.52142	0.925461	0.0590444	0.0509068
GOTERM_CC_DIRECT	GO:0005764~lysosome	9	3.87931	0.00832677	GJA1, GOT1, IL1B, CAT, ADRB2, MPO, CTSD, LDLR, SOD1	232	226	18224	3.12817	0.926379	0.0590444	0.0509068
GOTERM_CC_DIRECT	GO:0005788~endoplasmic reticulum lumen	8	3.44828	0.0114808	BACE1, COL1A1, F7, F10, MTTP, APOB, PTGS2, CES1	232	192	18224	3.27299	0.972751	0.0796001	0.0686296
GOTERM_CC_DIRECT	GO:0030315~T-tubule	4	1.72414	0.012235	SLC2A4, SCN5A, CACNA1S, ADRA1A	232	38	18224	8.2686	0.978525	0.0829855	0.0715484
GOTERM_CC_DIRECT	GO:0030141~secretory granule	5	2.15517	0.014497	COL1A1, IL1B, PLAT, MPO, VEGFA	232	74	18224	5.30755	0.989498	0.0962356	0.0829723
GOTERM_CC_DIRECT	GO:0005635~nuclear envelope	7	3.01724	0.0159977	SREBF1, PARP1, ALOX5, PTGER3, BAX, SIRT1, MAPK3	232	159	18224	3.45825	0.993472	0.103985	0.0896536
GOTERM_CC_DIRECT	GO:0031143~pseudopodium	3	1.2931	0.0191956	MAPK1, RAF1, MAPK3	232	17	18224	13.8621	0.997636	0.122225	0.10538
GOTERM_CC_DIRECT	GO:0032839~dendrite cytoplasm	3	1.2931	0.0214169	MAPK1, OPRM1, SOD1	232	18	18224	13.092	0.998835	0.133641	0.115223
GOTERM_CC_DIRECT	GO:1905286~serine-type peptidase complex	2	0.862069	0.0251912	F7, F3	232	2	18224	78.5517	0.999651	0.151147	0.130316
GOTERM_CC_DIRECT	GO:0097124~cyclin A2-CDK2 complex	2	0.862069	0.0251912	CCNA2, CDK2	232	2	18224	78.5517	0.999651	0.151147	0.130316
GOTERM_CC_DIRECT	GO:0043231~intracellular membrane-bounded organelle	14	6.03448	0.0260465	CHUK, INSR, PON1, CYP3A4, PTGS1, POR, CYP1A2, CAT, CHEK1, CYP1A1, CYP1B1, OLR1, PPARG, APOB	232	558	18224	1.97083	0.999735	0.153331	0.132198
GOTERM_CC_DIRECT	GO:0030425~dendrite	10	4.31034	0.0276458	CHRM2, GABRA2, CHRM3, CHRM1, NCF1, STAT1, GABRA5, CCL2, HTR2A, ELK1	232	335	18224	2.34483	0.999841	0.158454	0.136616
GOTERM_CC_DIRECT	GO:0005925~focal adhesion	11	4.74138	0.0279326	DPP4, GJA1, PLAU, CAV1, CAT, HSPB1, MAPK1, OPRM1, EGFR, ICAM1, MAPK3	232	391	18224	2.2099	0.999855	0.158454	0.136616
GOTERM_CC_DIRECT	GO:0005581~collagen trimer	5	2.15517	0.0295697	RXRB, COL1A1, MMP1, ADIPOQ, PCOLCE	232	92	18224	4.26912	0.999914	0.159247	0.137299
GOTERM_CC_DIRECT	GO:0000228~nuclear chromosome	4	1.72414	0.0296036	TOP2A, JUN, BIRC5, TOP1	232	53	18224	5.92843	0.999915	0.159247	0.137299
GOTERM_CC_DIRECT	GO:0016328~lateral plasma membrane	4	1.72414	0.0296036	CLDN4, GJA1, ERBB3, SCN5A	232	53	18224	5.92843	0.999915	0.159247	0.137299
GOTERM_CC_DIRECT	GO:0010008~endosome membrane	7	3.01724	0.0309463	BACE1, INSR, ERBB2, APOB, LDLR, EGFR, SLC6A4	232	185	18224	2.97223	0.999945	0.162678	0.140258
GOTERM_CC_DIRECT	GO:0005771~multivesicular body	3	1.2931	0.0312843	BACE1, GJA1, SLC2A4	232	22	18224	10.7116	0.999951	0.162678	0.140258
GOTERM_CC_DIRECT	GO:0005892~acetylcholine-gated channel complex	3	1.2931	0.0367681	CHRNA2, CHRNA7, HTR3A	232	24	18224	9.81897	0.999992	0.185956	0.160328
GOTERM_CC_DIRECT	GO:0097136~Bcl-2 family protein complex	2	0.862069	0.0375488	BAX, BCL2L1	232	3	18224	52.3678	0.999993	0.185956	0.160328
GOTERM_CC_DIRECT	GO:0035189~Rb-E2F complex	2	0.862069	0.0375488	RB1, E2F1	232	3	18224	52.3678	0.999993	0.185956	0.160328
GOTERM_CC_DIRECT	GO:0016020~membrane	38	16.3793	0.0439669	ACHE, CHRM1, SLC2A4, SLC6A2, TNF, CYP19A1, HK2, EGFR, PIK3CG, ICAM1, DPP4, PPP3CA, CCNB1, CCND1, PSMD3, ERBB2, HMOX1, OLR1, LDLR, KCNH2, ABCC1, VCAM1, PARP1, CAV1, INSR, FOS, ESR1, VEGFA, POR, CD40LG, SOAT1, FASN, KCNMA1, CAT, BCL2, CDK1, BAX, BCL2L1	232	2200	18224	1.3568	0.999999	0.214338	0.184798
GOTERM_CC_DIRECT	GO:0043204~perikaryon	5	2.15517	0.0459504	IFNG, MAPK1, CCL2, OPRM1, TOP1	232	106	18224	3.70527	1	0.220562	0.190164
GOTERM_CC_DIRECT	GO:0097443~sorting endosome	2	0.862069	0.0497505	PTPN1, KDR	232	4	18224	39.2759	1	0.231674	0.199744
GOTERM_CC_DIRECT	GO:0031233~intrinsic component of external side of plasma membrane	2	0.862069	0.0497505	F10, F3	232	4	18224	39.2759	1	0.231674	0.199744
GOTERM_CC_DIRECT	GO:0005622~intracellular	25	10.7759	0.051544	CXCL8, GSTP1, PIK3CG, IKBKB, MAPK8, RASSF1, ERBB3, CCND1, CCL2, MAPK1, SCN5A, NKX3-1, MAPK3, KCNH2, NOS2, CHUK, PRKCB, CAV1, AKR1C3, PRKCA, MAPK14, IL2, MAPK10, CD40LG, RAF1	232	1332	18224	1.47432	1	0.236496	0.203902
GOTERM_CC_DIRECT	GO:0033256~I-kappaB/NF-kappaB complex	2	0.862069	0.0617981	NFKBIA, RELA	232	5	18224	31.4207	1	0.279435	0.240923
GOTERM_CC_DIRECT	GO:0005768~endosome	7	3.01724	0.0675155	BACE1, CAV1, CDK2, KDR, ADRB2, LDLR, EGFR	232	225	18224	2.44383	1	0.297547	0.256539
GOTERM_CC_DIRECT	GO:0005758~mitochondrial intermembrane space	4	1.72414	0.0677111	HSD3B2, HSD3B1, CAT, SOD1	232	74	18224	4.24604	1	0.297547	0.256539
GOTERM_CC_DIRECT	GO:0045177~apical part of cell	4	1.72414	0.0699005	VCAM1, CA2, PLAT, LDLR	232	75	18224	4.18943	1	0.302902	0.261156
GOTERM_CC_DIRECT	GO:0031965~nuclear membrane	7	3.01724	0.0721634	CDK4, ALOX5, BCL2, ADRA1B, ADRA1A, EGFR, BCL2L1	232	229	18224	2.40114	1	0.308425	0.265917
GOTERM_CC_DIRECT	GO:0030868~smooth endoplasmic reticulum membrane	2	0.862069	0.085439	HSD3B2, HSD3B1	232	7	18224	22.4433	1	0.355426	0.306441
GOTERM_CC_DIRECT	GO:0031264~death-inducing signaling complex	2	0.862069	0.085439	CASP8, CASP3	232	7	18224	22.4433	1	0.355426	0.306441
GOTERM_CC_DIRECT	GO:0042383~sarcolemma	4	1.72414	0.0934791	PPP3CA, VCAM1, SCN5A, OPRM1	232	85	18224	3.69655	1	0.383756	0.330867
GOTERM_CC_DIRECT	GO:0009898~cytoplasmic side of plasma membrane	3	1.2931	0.0990598	IKBKB, CHUK, PTEN	232	42	18224	5.61084	1	0.401385	0.346066

## Sheet: SJZT-FDR<0.5MF
Category	Term	Count	%	PValue	Genes	List Total	Pop Hits	Pop Total	Fold Enrichment	Bonferroni	Benjamini	FDR
GOTERM_MF_DIRECT	GO:0019899~enzyme binding	41	17.6724	1.98429e-26	TOP2A, PTEN, CYP3A4, PTGS2, HIF1A, EGFR, PPP3CA, MAPK8, RXRA, CCND1, AKT1, HMOX1, SCN5A, NCOA1, PTPN1, GSTM2, JUN, GSTM1, TGFB1, UGT1A1, PARP1, STAT1, CAV1, PRKCA, MAPK14, ESR1, SIRT1, ESR2, BACE1, NFKBIA, AR, POR, SLPI, CYP1A2, CAT, CYP1A1, BIRC5, PPARG, PGR, RAF1, TP53	231	333	16881	8.99758	1.30368e-23	1.30368e-23	1.17668e-23
GOTERM_MF_DIRECT	GO:0005515~protein binding	175	75.431	1.07446e-13	RB1, CHRM3, NCF1, SERPINE1, PLAT, AHR, ELK1, TNF, ICAM1, NR3C2, HERC5, GJA1, RASSF1, CCND1, PLAU, MYC, CHEK2, PSMD3, CHEK1, PIM1, KDR, AKT1, KCNH2, PRKCB, IGFBP3, ADIPOQ, PRKCA, PCOLCE, RUNX2, AR, POR, SLPI, SOAT1, PGR, RAF1, TP53, ABCG2, GRIA2, MTTP, ADRB1, ADRB2, HIF1A, ACACA, DPP4, CCNB1, MAP2, HMOX1, CACNA1S, DRD1, LTA4H, APOB, GSTM2, JUN, TGFB1, INSR, CAV1, IGF2, SELE, ESR1, ESR2, FOSL2, NFK…	231	8785	16881	1.45574	7.06075e-11	2.87469e-11	2.59466e-11
GOTERM_MF_DIRECT	GO:0008134~transcription factor binding	26	11.2069	1.31264e-13	RB1, AHR, HIF1A, RELA, CCND1, MYC, E2F1, PIM1, E2F2, MAPK1, NKX3-1, NCOA2, JUN, PARP1, CDKN2A, STAT3, FOS, ESR1, SIRT1, NFKBIA, AR, BCL2, PPARG, PPARA, TP53, PPARD	231	284	16881	6.69023	8.6217e-11	2.87469e-11	2.59466e-11
GOTERM_MF_DIRECT	GO:0004879~RNA polymerase II transcription factor activity, ligand-activated sequence-specific DNA binding	12	5.17241	1.05284e-12	RXRB, AR, RXRA, NR1I3, STAT3, NR1I2, PPARG, AHR, PPARA, ESR1, ESR2, PPARD	231	36	16881	24.3593	6.91706e-10	1.72928e-10	1.56083e-10
GOTERM_MF_DIRECT	GO:0008144~drug binding	15	6.46552	1.66351e-12	CHRM2, TOP2A, CHRM3, GABRA1, CHRM1, CHRNA2, GSTP1, NR1I2, HTR2A, SLC6A3, PPP3CA, FASN, PPARG, PPARA, PPARD	231	76	16881	14.4233	1.09296e-09	2.18586e-10	1.97293e-10
GOTERM_MF_DIRECT	GO:0042802~identical protein binding	39	16.8103	2.00738e-12	RB1, PTEN, HSPB1, TNF, RELA, EGFR, DPP4, CASP8, ERBB3, CHEK2, ERBB2, HSF1, AKT1, MAPK1, LDLR, KCNH2, NQO1, JUN, PARP1, GOT1, STAT1, CAV1, ADIPOQ, STAT3, MMP9, ESR1, SIRT1, SOD1, VEGFA, NFKBIA, COL1A1, CLDN4, BCL2, BAX, BIRC5, PPARG, RAF1, TP53, BCL2L1	231	749	16881	3.80513	1.31886e-09	2.19809e-10	1.98397e-10
GOTERM_MF_DIRECT	GO:0042803~protein homodimerization activity	38	16.3793	4.20977e-12	TOP2A, ACHE, MAOB, CHRNA7, PON1, ODC1, ABAT, HMGCR, ADRB2, PTGS2, RELA, SLC6A4, DPP4, IKBKB, ERBB3, CHEK2, HMOX1, XDH, KCNH2, GSTM2, JUN, GSTM1, TGFB1, UGT1A1, NOS2, CHUK, STAT1, ADIPOQ, ADRA2A, SOD1, VEGFA, FASN, CAT, BCL2, BAX, BIRC5, ABCG2, BCL2L1	231	730	16881	3.80406	2.7658e-09	3.95117e-10	3.56628e-10
GOTERM_MF_DIRECT	GO:0046982~protein heterodimerization activity	30	12.931	8.15665e-12	TOP2A, MTTP, ADRB1, AHR, ADRA1B, HIF1A, ADRA1A, RELA, EGFR, IKBKB, PPP3CA, RXRA, ERBB3, ERBB2, JUN, TGFB1, UGT1A1, CHUK, BAD, CAV1, FOS, ADRA2A, VEGFA, BCL2, BAX, BIRC5, RAF1, TP53, BCL2L1, PPARD	231	465	16881	4.7147	5.35895e-09	6.69864e-10	6.04611e-10
GOTERM_MF_DIRECT	GO:0003707~steroid hormone receptor activity	13	5.60345	1.01065e-11	NR1I3, NR1I2, ESR1, ESR2, NR3C2, RXRB, AR, RXRA, PGR, PPARG, PPARA, RXRG, PPARD	231	56	16881	16.9645	6.63995e-09	7.37776e-10	6.65907e-10
GOTERM_MF_DIRECT	GO:0019901~protein kinase binding	25	10.7759	3.64959e-10	GSK3B, PTEN, HSPB1, HIF1A, RELA, EGFR, CASP9, IKBKB, CCNB1, CCND1, CHEK2, HSF1, E2F1, SCN5A, SREBF1, PTPN1, PARP1, CDKN2A, BAD, CAV1, STAT3, ADRA2A, CCNA2, TP53, BCL2L1	231	376	16881	4.8589	2.39778e-07	2.39778e-08	2.16421e-08
GOTERM_MF_DIRECT	GO:0043565~sequence-specific DNA binding	26	11.2069	4.46254e-08	NR1I3, NR1I2, ELK1, HIF1A, NR3C2, RXRB, RXRA, MYC, HSF1, E2F1, RXRG, NKX3-1, JUN, FOS, ESR1, ESR2, FOSL2, AR, IRF1, BCL2, PPARG, PGR, PPARA, TP53, PPARD, NFE2L2	231	518	16881	3.668	2.93185e-05	2.66535e-06	2.40572e-06
GOTERM_MF_DIRECT	GO:0005496~steroid binding	8	3.44828	5.60207e-08	AR, UGT1A1, SULT1E1, PGR, CYP3A4, ESR1, ESR2, NR3C2	231	27	16881	21.6527	3.6805e-05	3.06714e-06	2.76836e-06
GOTERM_MF_DIRECT	GO:0005230~extracellular ligand-gated ion channel activity	8	3.44828	2.51388e-07	GABRA2, GABRA1, CHRNA2, GABRA6, GABRA5, CHRNA7, GABRA3, HTR3A	231	33	16881	17.7159	0.000165148	1.27047e-05	1.14671e-05
GOTERM_MF_DIRECT	GO:0020037~heme binding	13	5.60345	3.81326e-07	NOS2, NOS3, CYP3A4, PTGS2, MPO, CYP19A1, PTGS1, CYP1A2, CAT, CYP1A1, CYP1B1, HMOX1, DUOX2	231	137	16881	6.9344	0.0002505	1.78951e-05	1.61519e-05
GOTERM_MF_DIRECT	GO:0004672~protein kinase activity	20	8.62069	5.05393e-07	GSK3B, CHUK, PRKCB, PRKCA, MAPK14, EGFR, PIK3CG, MAPK10, IKBKB, ERBB3, CCND1, CDK4, CHEK2, ERBB2, CHEK1, CDK2, CDK1, CCL2, AKT1, RAF1	231	359	16881	4.07119	0.000331988	2.21362e-05	1.99799e-05
GOTERM_MF_DIRECT	GO:0003700~transcription factor activity, sequence-specific DNA binding	34	14.6552	8.91747e-07	RB1, NR1I3, NR1I2, AHR, ELK1, HIF1A, RELA, NR3C2, RXRB, RXRA, MYC, HSF1, E2F1, E2F2, RXRG, NKX3-1, RUNX1T1, SREBF1, JUN, STAT1, STAT3, FOS, ESR1, RUNX2, ESR2, FOSL2, AR, IRF1, PPARG, PGR, PPARA, TP53, PPARD, NFE2L2	231	961	16881	2.58548	0.000585707	3.66174e-05	3.30504e-05
GOTERM_MF_DIRECT	GO:0016907~G-protein coupled acetylcholine receptor activity	5	2.15517	1.13796e-06	CHRM2, CHRM3, CHRM1, CHRM4, CHRM5	231	7	16881	52.1985	0.00074736	4.39788e-05	3.96947e-05
GOTERM_MF_DIRECT	GO:0051721~protein phosphatase 2A binding	7	3.01724	1.39623e-06	PTPN1, STAT1, BCL2, AKT1, HMGCR, TP53, SLC6A3	231	27	16881	18.9461	0.000916904	5.09624e-05	4.5998e-05
GOTERM_MF_DIRECT	GO:0097110~scaffold protein binding	8	3.44828	3.642e-06	KCNH2, IKBKB, GJA1, CASP8, CHUK, NOS3, SCN5A, MAPK3	231	48	16881	12.1797	0.00238994	0.000122145	0.000110246
GOTERM_MF_DIRECT	GO:0016491~oxidoreductase activity	14	6.03448	3.71826e-06	MAOB, ADH1C, MAOA, NOS3, ADH1B, AKR1C1, GSR, AKR1C3, AKR1B1, CYP3A4, POR, FASN, CYP1A2, CYP1A1	231	200	16881	5.11545	0.00243992	0.000122145	0.000110246
GOTERM_MF_DIRECT	GO:0005125~cytokine activity	13	5.60345	5.41777e-06	IL10, TGFB1, ADIPOQ, TNF, IL2, VEGFA, IL4, IL1A, IL6, CD40LG, IFNG, IL1B, SPP1	231	176	16881	5.3978	0.00355316	0.000169499	0.000152988
GOTERM_MF_DIRECT	GO:0016301~kinase activity	15	6.46552	5.83883e-06	GSK3B, CDKN1A, CDKN2A, PRKCA, PIK3CG, MAPK8, PLAU, PKIA, ERBB2, CHEK1, CDK2, AKT1, MAPK1, RAF1, MAPK3	231	241	16881	4.54842	0.00382878	0.000174369	0.000157383
GOTERM_MF_DIRECT	GO:0004716~receptor signaling protein tyrosine kinase activity	5	2.15517	6.61101e-06	ERBB3, INSR, ERBB2, KDR, EGFR	231	10	16881	36.539	0.00433403	0.000188845	0.000170449
GOTERM_MF_DIRECT	GO:0003682~chromatin binding	19	8.18966	7.23184e-06	NCOA1, TOP2A, SREBF1, NCOA2, JUN, PRKCB, FOS, MPO, ELK1, ESR1, EGFR, RELA, RUNX2, FOSL2, AR, CDK1, PPARG, TOP1, TP53	231	391	16881	3.5511	0.00474007	0.000197972	0.000178687
GOTERM_MF_DIRECT	GO:0001077~transcriptional activator activity, RNA polymerase II core promoter proximal region sequence-specific binding	14	6.03448	2.20541e-05	SREBF1, JUN, STAT3, FOS, ELK1, HIF1A, ESR1, RELA, RUNX2, AR, MYC, IRF1, PGR, PPARA	231	236	16881	4.33513	0.0143852	0.000579581	0.000523123
GOTERM_MF_DIRECT	GO:0032403~protein complex binding	13	5.60345	2.65345e-05	NCOA1, SREBF1, CDKN1A, HTR2A, SLC6A3, RELA, NFKBIA, CASP8, CCND1, CDK4, MYC, CASP3, PPARA	231	206	16881	4.61171	0.0172823	0.000670507	0.000605191
GOTERM_MF_DIRECT	GO:0004707~MAP kinase activity	5	2.15517	3.01877e-05	MAPK10, MAPK8, MAPK1, MAPK14, MAPK3	231	14	16881	26.0993	0.0196382	0.000713176	0.000643703
GOTERM_MF_DIRECT	GO:0000978~RNA polymerase II core promoter proximal region sequence-specific DNA binding	17	7.32759	3.03941e-05	SREBF1, NCOA2, JUN, STAT1, STAT3, FOS, ELK1, ESR1, RELA, RUNX2, FOSL2, AR, MYC, IRF1, HSF1, PGR, PPARA	231	355	16881	3.49951	0.0197712	0.000713176	0.000643703
GOTERM_MF_DIRECT	GO:0046983~protein dimerization activity	11	4.74138	4.01811e-05	NCOA1, SREBF1, NCOA2, PPP3CA, AR, MYC, ERBB2, STAT3, E2F1, E2F2, AHR	231	150	16881	5.35905	0.0260541	0.000891895	0.000805013
GOTERM_MF_DIRECT	GO:0016712~oxidoreductase activity, acting on paired donors, with incorporation or reduction of molecular oxygen, reduced flavin or flavoprotein as one donor, and incorporation of one atom of oxygen	5	2.15517	4.07258e-05	CYP1A2, CYP1A1, CYP1B1, CYP3A4, CYP19A1	231	15	16881	24.3593	0.0264026	0.000891895	0.000805013
GOTERM_MF_DIRECT	GO:0004674~protein serine/threonine kinase activity	17	7.32759	6.06116e-05	GSK3B, PRKCB, PRKCA, MAPK14, PIK3CG, IKBKB, MAPK8, CDK4, CHEK2, CHEK1, CDK2, PIM1, CDK1, AKT1, MAPK1, RAF1, MAPK3	231	376	16881	3.30405	0.0390405	0.00128458	0.00115944
GOTERM_MF_DIRECT	GO:0002020~protease binding	9	3.87931	7.15511e-05	DPP4, CASP3, SERPINE1, BCL2, TNF, TP53, F3, LDLR, SLC6A3	231	101	16881	6.51189	0.0459228	0.00146903	0.00132593
GOTERM_MF_DIRECT	GO:0050661~NADP binding	6	2.58621	0.000104548	POR, NOS2, NOS3, GSR, CAT, HMGCR	231	35	16881	12.5276	0.0663852	0.00202115	0.00182426
GOTERM_MF_DIRECT	GO:0005102~receptor binding	16	6.89655	0.000104595	GSTM2, NOS2, CAV1, ADIPOQ, SERPINE1, PLAT, SLC6A3, DPP4, CXCL10, F7, AR, GJA1, RASA1, CAT, CCL2, PGR	231	353	16881	3.31231	0.0664143	0.00202115	0.00182426
GOTERM_MF_DIRECT	GO:0004890~GABA-A receptor activity	5	2.15517	0.000110791	GABRA2, GABRA1, GABRA6, GABRA5, GABRA3	231	19	16881	19.231	0.0702077	0.00207971	0.00187712
GOTERM_MF_DIRECT	GO:0044212~transcription regulatory region DNA binding	12	5.17241	0.000168119	AR, JUN, RXRA, STAT3, PPARG, FOS, AHR, TNF, TP53, RELA, NKX3-1, NFE2L2	231	213	16881	4.11707	0.104581	0.00306818	0.0027693
GOTERM_MF_DIRECT	GO:0035257~nuclear hormone receptor binding	5	2.15517	0.000202487	NCOA1, NCOA2, STAT1, HIF1A, SIRT1	231	22	16881	16.6086	0.124576	0.00352452	0.00318119
GOTERM_MF_DIRECT	GO:0004252~serine-type endopeptidase activity	13	5.60345	0.000203854	PRSS1, F10, MMP1, MMP2, CTRB1, MMP3, PLAT, F3, MMP9, DPP4, F7, PLAU, CTSD	231	255	16881	3.72554	0.125362	0.00352452	0.00318119
GOTERM_MF_DIRECT	GO:0009055~electron carrier activity	8	3.44828	0.000227754	POR, MAOB, NCF1, CYP1A2, GSR, AKR1B1, CYP19A1, XDH	231	90	16881	6.49582	0.138992	0.00383678	0.00346303
GOTERM_MF_DIRECT	GO:0001046~core promoter sequence-specific DNA binding	6	2.58621	0.00028374	PPARG, TOP1, ESR1, SIRT1, TP53, ESR2	231	43	16881	10.1969	0.170095	0.00466043	0.00420645
GOTERM_MF_DIRECT	GO:0042166~acetylcholine binding	5	2.15517	0.000396519	ACHE, CHRM3, CHRNA2, CHRNA7, HTR3A	231	26	16881	14.0534	0.229384	0.00635398	0.00573503
GOTERM_MF_DIRECT	GO:0070330~aromatase activity	5	2.15517	0.000460538	CYP1A2, CYP1A1, CYP1B1, CYP3A4, CYP19A1	231	27	16881	13.5329	0.261137	0.00720413	0.00650236
GOTERM_MF_DIRECT	GO:0004886~9-cis retinoic acid receptor activity	3	1.2931	0.000549522	RXRB, RXRA, RXRG	231	3	16881	73.0779	0.303115	0.00802303	0.00724148
GOTERM_MF_DIRECT	GO:0004937~alpha1-adrenergic receptor activity	3	1.2931	0.000549522	ADRA1D, ADRA1B, ADRA1A	231	3	16881	73.0779	0.303115	0.00802303	0.00724148
GOTERM_MF_DIRECT	GO:0004882~androgen receptor activity	3	1.2931	0.000549522	AR, NR1I3, NKX3-1	231	3	16881	73.0779	0.303115	0.00802303	0.00724148
GOTERM_MF_DIRECT	GO:0031625~ubiquitin protein ligase binding	13	5.60345	0.000589952	RB1, KCNH2, GSK3B, CDKN1A, HIF1A, EGFR, RELA, NFKBIA, CASP8, CHEK2, BCL2, SCN5A, TP53	231	287	16881	3.31015	0.321393	0.00842606	0.00760525
GOTERM_MF_DIRECT	GO:0051059~NF-kappaB binding	5	2.15517	0.000696508	NFKBIA, GSK3B, CDKN2A, RELA, PPARD	231	30	16881	12.1797	0.367304	0.00973629	0.00878786
GOTERM_MF_DIRECT	GO:0051434~BH3 domain binding	3	1.2931	0.00108916	BCL2, BAX, BCL2L1	231	4	16881	54.8084	0.511281	0.0143115	0.0129174
GOTERM_MF_DIRECT	GO:0035173~histone kinase activity	3	1.2931	0.00108916	CCNB1, CDK2, CDK1	231	4	16881	54.8084	0.511281	0.0143115	0.0129174
GOTERM_MF_DIRECT	GO:0051380~norepinephrine binding	3	1.2931	0.00108916	ADRB1, ADRB2, ADRA2A	231	4	16881	54.8084	0.511281	0.0143115	0.0129174
GOTERM_MF_DIRECT	GO:0008270~zinc ion binding	30	12.931	0.00126699	ADH1C, ADH1B, NR1I3, NR1I2, NR3C2, RXRB, NPEPPS, RASSF1, RXRA, CA2, LTA4H, RXRG, PTPN1, PARP1, PRKCB, MMP1, MMP2, MMP3, PRKCA, MMP9, ESR1, ESR2, SOD1, AR, BIRC5, PPARG, PGR, PPARA, TP53, PPARD	231	1169	16881	1.8754	0.565232	0.0163219	0.0147319
GOTERM_MF_DIRECT	GO:0019903~protein phosphatase binding	6	2.58621	0.00166211	ERBB2, STAT3, PPARG, MAPK14, TP53, EGFR	231	63	16881	6.9598	0.664761	0.0210001	0.0189544
GOTERM_MF_DIRECT	GO:0004714~transmembrane receptor protein tyrosine kinase activity	5	2.15517	0.001723	ERBB3, INSR, ERBB2, KDR, EGFR	231	38	16881	9.61552	0.67793	0.0213587	0.0192781
GOTERM_MF_DIRECT	GO:0050660~flavin adenine dinucleotide binding	6	2.58621	0.00178327	POR, MAOB, NOS2, NOS3, GSR, XDH	231	64	16881	6.85106	0.690456	0.0214893	0.019396
GOTERM_MF_DIRECT	GO:0030284~estrogen receptor activity	3	1.2931	0.00179895	ESR1, ESR2, NKX3-1	231	5	16881	43.8468	0.693634	0.0214893	0.019396
GOTERM_MF_DIRECT	GO:0001948~glycoprotein binding	6	2.58621	0.00191079	F7, TGFB1, RASA1, PLAT, LDLR, EGFR	231	65	16881	6.74565	0.715377	0.0224176	0.0202339
GOTERM_MF_DIRECT	GO:0047485~protein N-terminus binding	7	3.01724	0.00211164	NCOA1, RASSF1, TGFB1, PARP1, TP53, RELA, SLC6A3	231	97	16881	5.27366	0.75063	0.0243395	0.0219685
GOTERM_MF_DIRECT	GO:0030332~cyclin binding	4	1.72414	0.00239784	CDKN1A, CDK4, CDK2, CDK1	231	20	16881	14.6156	0.793462	0.0271617	0.0245158
GOTERM_MF_DIRECT	GO:0008131~primary amine oxidase activity	3	1.2931	0.00267421	VCAM1, MAOB, MAOA	231	6	16881	36.539	0.827836	0.0288025	0.0259968
GOTERM_MF_DIRECT	GO:0051379~epinephrine binding	3	1.2931	0.00267421	ADRB1, ADRB2, ADRA2A	231	6	16881	36.539	0.827836	0.0288025	0.0259968
GOTERM_MF_DIRECT	GO:0008503~benzodiazepine receptor activity	3	1.2931	0.00267421	GABRA2, GABRA6, GABRA3	231	6	16881	36.539	0.827836	0.0288025	0.0259968
GOTERM_MF_DIRECT	GO:0042826~histone deacetylase binding	7	3.01724	0.0027206	TOP2A, MAPK8, CCND1, PARP1, HIF1A, RELA, NKX3-1	231	102	16881	5.01515	0.833018	0.0288295	0.0260212
GOTERM_MF_DIRECT	GO:0004601~peroxidase activity	4	1.72414	0.0031749	PTGS2, MPO, DUOX2, PTGS1	231	22	16881	13.2869	0.876217	0.0331097	0.0298844
GOTERM_MF_DIRECT	GO:0008504~monoamine transmembrane transporter activity	3	1.2931	0.00371032	SLC6A2, SLC6A3, SLC6A4	231	7	16881	31.3191	0.913032	0.0375028	0.0338496
GOTERM_MF_DIRECT	GO:0004032~alditol:NADP+ 1-oxidoreductase activity	3	1.2931	0.00371032	AKR1C1, AKR1C3, AKR1B1	231	7	16881	31.3191	0.913032	0.0375028	0.0338496
GOTERM_MF_DIRECT	GO:0019825~oxygen binding	5	2.15517	0.00378471	CYP1A2, CYP1A1, CYP1B1, CYP3A4, CYP19A1	231	47	16881	7.77425	0.917196	0.0376751	0.0340051
GOTERM_MF_DIRECT	GO:0008009~chemokine activity	5	2.15517	0.00440174	CXCL10, CXCL11, CXCL8, CCL2, CXCL2	231	49	16881	7.45693	0.944885	0.0431633	0.0389587
GOTERM_MF_DIRECT	GO:0030235~nitric-oxide synthase regulator activity	3	1.2931	0.00490279	AKT1, ESR1, EGFR	231	8	16881	27.4042	0.960405	0.0473696	0.0427552
GOTERM_MF_DIRECT	GO:0005506~iron ion binding	8	3.44828	0.00503039	NOS3, ALOX5, CYP1A2, CYP1A1, CYP1B1, CYP3A4, CYP19A1, XDH	231	153	16881	3.82107	0.963604	0.047898	0.0432322
GOTERM_MF_DIRECT	GO:0008083~growth factor activity	8	3.44828	0.0068474	IL10, IL4, IL6, TGFB1, EGF, IGF2, IL2, VEGFA	231	162	16881	3.60879	0.989048	0.0642677	0.0580073
GOTERM_MF_DIRECT	GO:0005164~tumor necrosis factor receptor binding	4	1.72414	0.00702424	CASP8, CD40LG, STAT1, TNF	231	29	16881	10.0797	0.990257	0.064623	0.0583279
GOTERM_MF_DIRECT	GO:0003713~transcription coactivator activity	10	4.31034	0.00708197	RXRB, RB1, NCOA1, NCOA2, JUN, RXRA, NR1I3, NR1I2, ESR2, PPARD	231	248	16881	2.94669	0.990622	0.064623	0.0583279
GOTERM_MF_DIRECT	GO:0008233~peptidase activity	6	2.58621	0.00773612	BACE1, CASP9, CASP8, SLPI, CASP3, LTA4H	231	90	16881	4.87186	0.993918	0.0696251	0.0628427
GOTERM_MF_DIRECT	GO:0004497~monooxygenase activity	5	2.15517	0.00801639	CYP1A2, CYP1A1, CYP1B1, CYP3A4, CYP19A1	231	58	16881	6.29982	0.994948	0.0711726	0.0642395
GOTERM_MF_DIRECT	GO:0043295~glutathione binding	3	1.2931	0.00937461	GSTM2, GSTM1, GSTP1	231	11	16881	19.9303	0.997946	0.0821216	0.0741219
GOTERM_MF_DIRECT	GO:0001228~transcriptional activator activity, RNA polymerase II transcription regulatory region sequence-specific binding	6	2.58621	0.00965926	RXRB, NR1I3, STAT3, NR1I2, HIF1A, TP53	231	95	16881	4.61545	0.9983	0.0835018	0.0753677
GOTERM_MF_DIRECT	GO:0046934~phosphatidylinositol-4,5-bisphosphate 3-kinase activity	5	2.15517	0.0101063	ERBB3, EGF, ERBB2, EGFR, PIK3CG	231	62	16881	5.89338	0.998736	0.0862319	0.0778318
GOTERM_MF_DIRECT	GO:0004693~cyclin-dependent protein serine/threonine kinase activity	4	1.72414	0.0109449	CCNB1, CDK4, CDK2, CDK1	231	34	16881	8.5974	0.999276	0.09219	0.0832096
GOTERM_MF_DIRECT	GO:0000983~transcription factor activity, RNA polymerase II core promoter sequence-specific	3	1.2931	0.0111492	STAT1, RELA, NKX3-1	231	12	16881	18.2695	0.999368	0.0925701	0.0835526
GOTERM_MF_DIRECT	GO:0001047~core promoter binding	5	2.15517	0.0112718	RB1, E2F1, E2F2, ELK1, NKX3-1	231	64	16881	5.70921	0.999417	0.0925701	0.0835526
GOTERM_MF_DIRECT	GO:0097153~cysteine-type endopeptidase activity involved in apoptotic process	3	1.2931	0.013059	CASP9, CASP8, CASP3	231	13	16881	16.8641	0.999822	0.105923	0.0956049
GOTERM_MF_DIRECT	GO:0030331~estrogen receptor binding	4	1.72414	0.0137947	NCOA1, PARP1, PPARG, NKX3-1	231	37	16881	7.90032	0.999891	0.110526	0.0997595
GOTERM_MF_DIRECT	GO:0050998~nitric-oxide synthase binding	3	1.2931	0.0151	CAV1, SCN5A, SLC6A4	231	14	16881	15.6596	0.999954	0.119526	0.107883
GOTERM_MF_DIRECT	GO:0010181~FMN binding	3	1.2931	0.0172682	POR, NOS2, NOS3	231	15	16881	14.6156	0.999989	0.133194	0.120219
GOTERM_MF_DIRECT	GO:0004033~aldo-keto reductase (NADP) activity	3	1.2931	0.0172682	AKR1C1, AKR1C3, AKR1B1	231	15	16881	14.6156	0.999989	0.133194	0.120219
GOTERM_MF_DIRECT	GO:0008289~lipid binding	7	3.01724	0.0174348	BAD, MTTP, PTEN, BAX, PPARA, PTGS2, PPARD	231	151	16881	3.38772	0.99999	0.133194	0.120219
GOTERM_MF_DIRECT	GO:0005524~ATP binding	31	13.3621	0.0205388	TOP2A, GSK3B, HK2, ACACA, EGFR, PIK3CG, IKBKB, MAPK8, ERBB3, CHEK2, ERBB2, CHEK1, KDR, PIM1, AKT1, MAPK1, MAPK3, ABCC1, CHUK, PRKCB, INSR, PRKCA, MAPK14, RUNX2, MAPK10, CDK4, CDK2, CDK1, RAF1, TP53, ABCG2	231	1495	16881	1.51533	0.999999	0.153842	0.138856
GOTERM_MF_DIRECT	GO:0005088~Ras guanyl-nucleotide exchange factor activity	6	2.58621	0.020606	ERBB3, EGF, ERBB2, ADRB1, EGFR, IL2	231	115	16881	3.81276	0.999999	0.153842	0.138856
GOTERM_MF_DIRECT	GO:0008656~cysteine-type endopeptidase activator activity involved in apoptotic process	3	1.2931	0.0219714	BAD, CASP3, NKX3-1	231	17	16881	12.8961	1	0.162194	0.146394
GOTERM_MF_DIRECT	GO:0008201~heparin binding	7	3.01724	0.0225323	CXCL10, CXCL11, CCL2, PCOLCE, APOB, MPO, VEGFA	231	160	16881	3.19716	1	0.164486	0.148463
GOTERM_MF_DIRECT	GO:0005080~protein kinase C binding	4	1.72414	0.024657	TOP2A, PRKCB, HSPB1, AKT1	231	46	16881	6.3546	1	0.172731	0.155905
GOTERM_MF_DIRECT	GO:0051087~chaperone binding	5	2.15517	0.0247135	BAX, AHSA1, BIRC5, TP53, SOD1	231	81	16881	4.51098	1	0.172731	0.155905
GOTERM_MF_DIRECT	GO:0008237~metallopeptidase activity	5	2.15517	0.0247135	NPEPPS, MMP2, MMP3, LTA4H, MMP9	231	81	16881	4.51098	1	0.172731	0.155905
GOTERM_MF_DIRECT	GO:0003690~double-stranded DNA binding	5	2.15517	0.0247135	STAT1, MYC, ELK1, TP53, EGFR	231	81	16881	4.51098	1	0.172731	0.155905
GOTERM_MF_DIRECT	GO:0001085~RNA polymerase II transcription factor binding	4	1.72414	0.0260802	GSK3B, AR, ELK1, TP53	231	47	16881	6.2194	1	0.176055	0.158905
GOTERM_MF_DIRECT	GO:0004666~prostaglandin-endoperoxide synthase activity	2	0.862069	0.0270647	PTGS2, PTGS1	231	2	16881	73.0779	1	0.176055	0.158905
GOTERM_MF_DIRECT	GO:0070576~vitamin D 24-hydroxylase activity	2	0.862069	0.0270647	CYP1A1, CYP3A4	231	2	16881	73.0779	1	0.176055	0.158905
GOTERM_MF_DIRECT	GO:0005330~dopamine:sodium symporter activity	2	0.862069	0.0270647	SLC6A2, SLC6A3	231	2	16881	73.0779	1	0.176055	0.158905
GOTERM_MF_DIRECT	GO:0035403~histone kinase activity (H3-T6 specific)	2	0.862069	0.0270647	PRKCB, PRKCA	231	2	16881	73.0779	1	0.176055	0.158905
GOTERM_MF_DIRECT	GO:0034736~cholesterol O-acyltransferase activity	2	0.862069	0.0270647	SOAT1, SOAT2	231	2	16881	73.0779	1	0.176055	0.158905
GOTERM_MF_DIRECT	GO:0038052~RNA polymerase II transcription factor activity, estrogen-activated sequence-specific DNA binding	2	0.862069	0.0270647	ESR1, ESR2	231	2	16881	73.0779	1	0.176055	0.158905
GOTERM_MF_DIRECT	GO:0005543~phospholipid binding	5	2.15517	0.0299473	F10, BAD, PON1, APOB, F3	231	86	16881	4.24872	1	0.192896	0.174105
GOTERM_MF_DIRECT	GO:0030374~ligand-dependent nuclear receptor transcription coactivator activity	4	1.72414	0.0322037	NCOA1, NCOA2, PRKCB, PPARG	231	51	16881	5.7316	1	0.205416	0.185406
GOTERM_MF_DIRECT	GO:0070412~R-SMAD binding	3	1.2931	0.0327426	JUN, PARP1, FOS	231	21	16881	10.4397	1	0.206845	0.186696
GOTERM_MF_DIRECT	GO:0004713~protein tyrosine kinase activity	6	2.58621	0.0355634	ERBB3, EGF, INSR, ERBB2, KDR, EGFR	231	133	16881	3.29675	1	0.222525	0.200849
GOTERM_MF_DIRECT	GO:0004889~acetylcholine-activated cation-selective channel activity	3	1.2931	0.038755	CHRNA2, CHRNA7, HTR3A	231	23	16881	9.5319	1	0.232384	0.209747
GOTERM_MF_DIRECT	GO:0000982~transcription factor activity, RNA polymerase II core promoter proximal region sequence-specific binding	3	1.2931	0.038755	JUN, FOS, FOSL2	231	23	16881	9.5319	1	0.232384	0.209747
GOTERM_MF_DIRECT	GO:0015464~acetylcholine receptor activity	3	1.2931	0.038755	CHRNA2, CHRNA7, HTR3A	231	23	16881	9.5319	1	0.232384	0.209747
GOTERM_MF_DIRECT	GO:0008384~IkappaB kinase activity	2	0.862069	0.0403223	IKBKB, CHUK	231	3	16881	48.7186	1	0.232384	0.209747
GOTERM_MF_DIRECT	GO:0004769~steroid delta-isomerase activity	2	0.862069	0.0403223	HSD3B2, HSD3B1	231	3	16881	48.7186	1	0.232384	0.209747
GOTERM_MF_DIRECT	GO:0047086~ketosteroid monooxygenase activity	2	0.862069	0.0403223	AKR1C1, AKR1C3	231	3	16881	48.7186	1	0.232384	0.209747
GOTERM_MF_DIRECT	GO:0004705~JUN kinase activity	2	0.862069	0.0403223	MAPK10, MAPK8	231	3	16881	48.7186	1	0.232384	0.209747
GOTERM_MF_DIRECT	GO:0047718~indanol dehydrogenase activity	2	0.862069	0.0403223	AKR1C1, AKR1C3	231	3	16881	48.7186	1	0.232384	0.209747
GOTERM_MF_DIRECT	GO:0004517~nitric-oxide synthase activity	2	0.862069	0.0403223	NOS2, NOS3	231	3	16881	48.7186	1	0.232384	0.209747
GOTERM_MF_DIRECT	GO:0000979~RNA polymerase II core promoter sequence-specific DNA binding	4	1.72414	0.0426659	STAT1, HSF1, FOS, RUNX2	231	57	16881	5.12828	1	0.243752	0.220008
GOTERM_MF_DIRECT	GO:0003677~DNA binding	32	13.7931	0.048261	RB1, TOP2A, NR1I3, AHR, RELA, RXRB, RXRA, MYC, HSF1, E2F1, E2F2, MAPK1, RUNX1T1, SREBF1, JUN, PARP1, CDKN2A, STAT1, STAT3, FOS, ESR1, RUNX2, ESR2, AR, IRF1, PPARG, PGR, TOP1, PPARA, TP53, PPARD, NFE2L2	231	1674	16881	1.39695	1	0.272254	0.245733
GOTERM_MF_DIRECT	GO:0008395~steroid hydroxylase activity	3	1.2931	0.0484836	CYP1A1, CYP3A4, CYP19A1	231	26	16881	8.43207	1	0.272254	0.245733
GOTERM_MF_DIRECT	GO:0004197~cysteine-type endopeptidase activity	4	1.72414	0.0504711	CASP9, CASP8, CASP3, CTSD	231	61	16881	4.79199	1	0.276251	0.24934
GOTERM_MF_DIRECT	GO:0019838~growth factor binding	3	1.2931	0.0519034	ERBB3, ERBB2, KDR	231	27	16881	8.11977	1	0.276251	0.24934
GOTERM_MF_DIRECT	GO:0051879~Hsp90 protein binding	3	1.2931	0.0519034	KDR, AHR, HIF1A	231	27	16881	8.11977	1	0.276251	0.24934
GOTERM_MF_DIRECT	GO:0004435~phosphatidylinositol phospholipase C activity	3	1.2931	0.0519034	CHRM3, CHRM1, CHRM5	231	27	16881	8.11977	1	0.276251	0.24934
GOTERM_MF_DIRECT	GO:0004698~calcium-dependent protein kinase C activity	2	0.862069	0.0534001	PRKCB, PRKCA	231	4	16881	36.539	1	0.276251	0.24934
GOTERM_MF_DIRECT	GO:0034875~caffeine oxidase activity	2	0.862069	0.0534001	CYP1A2, CYP3A4	231	4	16881	36.539	1	0.276251	0.24934
GOTERM_MF_DIRECT	GO:0047115~trans-1,2-dihydrobenzene-1,2-diol dehydrogenase activity	2	0.862069	0.0534001	AKR1C1, AKR1C3	231	4	16881	36.539	1	0.276251	0.24934
GOTERM_MF_DIRECT	GO:0018636~phenanthrene 9,10-monooxygenase activity	2	0.862069	0.0534001	AKR1C1, AKR1C3	231	4	16881	36.539	1	0.276251	0.24934
GOTERM_MF_DIRECT	GO:0034617~tetrahydrobiopterin binding	2	0.862069	0.0534001	NOS2, NOS3	231	4	16881	36.539	1	0.276251	0.24934
GOTERM_MF_DIRECT	GO:0034056~estrogen response element binding	2	0.862069	0.0534001	ESR1, ESR2	231	4	16881	36.539	1	0.276251	0.24934
GOTERM_MF_DIRECT	GO:0008236~serine-type peptidase activity	4	1.72414	0.0546157	DPP4, F7, PRSS1, CTRB1	231	63	16881	4.63987	1	0.280332	0.253024
GOTERM_MF_DIRECT	GO:0002039~p53 binding	4	1.72414	0.0633752	GSK3B, CDKN2A, SIRT1, TP53	231	67	16881	4.36286	1	0.320289	0.289089
GOTERM_MF_DIRECT	GO:0000977~RNA polymerase II regulatory region sequence-specific DNA binding	7	3.01724	0.0658172	RXRB, RXRA, NR1I3, NR1I2, RXRG, TP53, RELA	231	208	16881	2.45935	1	0.320289	0.289089
GOTERM_MF_DIRECT	GO:0048248~CXCR3 chemokine receptor binding	2	0.862069	0.0663003	CXCL10, CXCL11	231	5	16881	29.2312	1	0.320289	0.289089
GOTERM_MF_DIRECT	GO:0004784~superoxide dismutase activity	2	0.862069	0.0663003	NQO1, SOD1	231	5	16881	29.2312	1	0.320289	0.289089
GOTERM_MF_DIRECT	GO:0051525~NFAT protein binding	2	0.862069	0.0663003	MAPK14, PPARA	231	5	16881	29.2312	1	0.320289	0.289089
GOTERM_MF_DIRECT	GO:0032451~demethylase activity	2	0.862069	0.0663003	CYP1A2, CYP1A1	231	5	16881	29.2312	1	0.320289	0.289089
GOTERM_MF_DIRECT	GO:0022851~GABA-gated chloride ion channel activity	2	0.862069	0.0663003	GABRA2, GABRA1	231	5	16881	29.2312	1	0.320289	0.289089
GOTERM_MF_DIRECT	GO:0097371~MDM2/MDM4 family protein binding	2	0.862069	0.0663003	CDKN2A, PPARA	231	5	16881	29.2312	1	0.320289	0.289089
GOTERM_MF_DIRECT	GO:0001618~virus receptor activity	4	1.72414	0.0703439	DPP4, HTR2A, LDLR, ICAM1	231	70	16881	4.17588	1	0.337343	0.304481
GOTERM_MF_DIRECT	GO:0004888~transmembrane signaling receptor activity	7	3.01724	0.0732148	THBD, CLDN4, ERBB3, ERBB2, SELE, EGFR, ICAM1	231	214	16881	2.3904	1	0.348566	0.314611
GOTERM_MF_DIRECT	GO:0004190~aspartic-type endopeptidase activity	3	1.2931	0.0740766	BACE1, CASP3, CTSD	231	33	16881	6.64345	1	0.350132	0.316025
GOTERM_MF_DIRECT	GO:0001540~beta-amyloid binding	3	1.2931	0.0780223	BACE1, ACHE, CHRNA7	231	34	16881	6.44805	1	0.360554	0.325432
GOTERM_MF_DIRECT	GO:0004064~arylesterase activity	2	0.862069	0.0790256	CA2, PON1	231	6	16881	24.3593	1	0.360554	0.325432
GOTERM_MF_DIRECT	GO:0003854~3-beta-hydroxy-delta5-steroid dehydrogenase activity	2	0.862069	0.0790256	HSD3B2, HSD3B1	231	6	16881	24.3593	1	0.360554	0.325432
GOTERM_MF_DIRECT	GO:0030346~protein phosphatase 2B binding	2	0.862069	0.0790256	BAD, SOD1	231	6	16881	24.3593	1	0.360554	0.325432
GOTERM_MF_DIRECT	GO:0004024~alcohol dehydrogenase activity, zinc-dependent	2	0.862069	0.0790256	ADH1C, ADH1B	231	6	16881	24.3593	1	0.360554	0.325432
GOTERM_MF_DIRECT	GO:0051117~ATPase binding	4	1.72414	0.0801459	AR, CAV1, PGR, ESR1	231	74	16881	3.95016	1	0.363144	0.327769
GOTERM_MF_DIRECT	GO:0004364~glutathione transferase activity	3	1.2931	0.0820326	GSTM2, GSTM1, GSTP1	231	35	16881	6.26382	1	0.366635	0.330921
GOTERM_MF_DIRECT	GO:0070491~repressing transcription factor binding	3	1.2931	0.0820326	MYC, RELA, RUNX2	231	35	16881	6.26382	1	0.366635	0.330921
GOTERM_MF_DIRECT	GO:0015276~ligand-gated ion channel activity	3	1.2931	0.0861049	CHRNA2, CHRNA7, HTR3A	231	36	16881	6.08983	1	0.382236	0.345002
GOTERM_MF_DIRECT	GO:0004128~cytochrome-b5 reductase activity, acting on NAD(P)H	2	0.862069	0.0915781	NQO1, POR	231	7	16881	20.8794	1	0.398456	0.359641
GOTERM_MF_DIRECT	GO:0034618~arginine binding	2	0.862069	0.0915781	NOS2, NOS3	231	7	16881	20.8794	1	0.398456	0.359641
GOTERM_MF_DIRECT	GO:0031406~carboxylic acid binding	2	0.862069	0.0915781	GOT1, AKR1C1	231	7	16881	20.8794	1	0.398456	0.359641
GOTERM_MF_DIRECT	GO:0001102~RNA polymerase II activating transcription factor binding	3	1.2931	0.0944263	RB1, JUN, NFE2L2	231	38	16881	5.76931	1	0.408145	0.368387
