# Supplementary material for: Elucidating the anti-aging mechanism of Si Jun Zi Tang by integrating network pharmacology and experimental validation in vivo
Source: Aging (Albany NY). 2022 May 10;14(9):3941–55. doi: 10.18632/aging.204055 (PMC9134961; doi:10.18632/aging.204055)
Supplement: Supplementary Table 4 [file aging-14-204055-s004.xlsx]

## Sheet: signaing Pathway as key words
Supplementary Table 4. Enrichment analysis of KEGG pathway.
Category	Term	Count	%	PValue	Genes	List Total	Pop Hits	Pop Total	Fold Enrichment	Bonferroni	Benjamini	FDR
KEGG_PATHWAY	hsa04151:PI3K-Akt signaling pathway	35	15.0862	8.8922e-10	CHRM2, GSK3B, CDKN1A, CHRM1, PTEN, RELA, EGFR, PIK3CG, CASP9, IKBKB, RXRA, CCND1, MYC, KDR, SPP1, AKT1, MAPK1, MAPK3, CHUK, EGF, NOS3, BAD, INSR, PRKCA, IL2, VEGFA, IL4, COL1A1, IL6, CDK4, CDK2, BCL2, RAF1, TP53, BCL2L1	212	345	6879	3.29184	2.0541e-07	5.86885e-09	2.76928e-09
KEGG_PATHWAY	hsa04010:MAPK signaling pathway	28	12.069	1.06217e-08	HSPB1, ELK1, TNF, RELA, EGFR, IKBKB, PPP3CA, MAPK8, MYC, CASP3, AKT1, MAPK1, CACNA1S, MAPK3, JUN, TGFB1, CHUK, PRKCB, EGF, PRKCA, FOS, MAPK14, MAPK10, IL1A, RASA1, IL1B, RAF1, TP53	212	253	6879	3.5911	2.45361e-06	5.98442e-08	2.82382e-08
KEGG_PATHWAY	hsa04668:TNF signaling pathway	27	11.6379	5.37023e-17	PTGS2, TNF, CXCL2, RELA, PIK3CG, ICAM1, IKBKB, MAPK8, CASP8, CASP3, CCL2, AKT1, MAPK1, MAPK3, JUN, VCAM1, CHUK, MMP3, FOS, MAPK14, SELE, MMP9, MAPK10, NFKBIA, CXCL10, IL6, IL1B	212	107	6879	8.18784	1.24052e-14	1.77218e-15	8.36222e-16
KEGG_PATHWAY	hsa04068:FoxO signaling pathway	25	10.7759	1.38275e-12	CDKN1A, PTEN, SLC2A4, EGFR, PIK3CG, IKBKB, MAPK8, CCNB1, CCND1, AKT1, MAPK1, MAPK3, IL10, TGFB1, CHUK, EGF, INSR, STAT3, MAPK14, SIRT1, MAPK10, IL6, CAT, CDK2, RAF1	212	134	6879	6.05375	3.19423e-10	2.12943e-11	1.0048e-11
KEGG_PATHWAY	hsa04066:HIF-1 signaling pathway	23	9.91379	6.24867e-14	CDKN1A, NOS2, PRKCB, NOS3, EGF, INSR, STAT3, SERPINE1, PRKCA, HIF1A, EGFR, PIK3CG, RELA, HK2, VEGFA, IL6, IFNG, ERBB2, BCL2, AKT1, HMOX1, MAPK1, MAPK3	212	96	6879	7.77403	1.44388e-11	1.03103e-12	4.86504e-13
KEGG_PATHWAY	hsa04620:Toll-like receptor signaling pathway	22	9.48276	4.9733e-12	JUN, CXCL8, CHUK, STAT1, FOS, MAPK14, TNF, PIK3CG, RELA, MAPK10, NFKBIA, IKBKB, CXCL10, CXCL11, IL6, MAPK8, CASP8, IL1B, SPP1, AKT1, MAPK1, MAPK3	212	106	6879	6.73451	1.14885e-09	6.46852e-11	3.05225e-11
KEGG_PATHWAY	hsa04919:Thyroid hormone signaling pathway	22	9.48276	2.57892e-11	NCOA1, NCOA2, GSK3B, PRKCB, STAT1, BAD, DIO1, PRKCA, HIF1A, ESR1, PIK3CG, CASP9, RXRB, RXRA, CCND1, MYC, AKT1, MAPK1, RAF1, RXRG, TP53, MAPK3	212	115	6879	6.20747	5.95732e-09	2.59013e-10	1.22218e-10
KEGG_PATHWAY	hsa04020:Calcium signaling pathway	22	9.48276	1.02224e-07	CHRM2, CHRM3, CHRM1, NOS2, PRKCB, NOS3, CHRNA7, PTGER3, CHRM5, PRKCA, ADRA1D, ADRB1, ADRB2, HTR2A, ADRA1B, ADRA1A, EGFR, PPP3CA, ERBB3, ERBB2, CACNA1S, DRD1	212	179	6879	3.98804	2.36134e-05	5.24749e-07	2.47609e-07
KEGG_PATHWAY	hsa04024:cAMP signaling pathway	22	9.48276	5.73615e-07	CHRM2, GRIA2, JUN, CHRM1, BAD, PTGER3, ADRB1, FOS, ADRB2, PIK3CG, RELA, MAPK10, NFKBIA, MAPK8, PDE3A, AKT1, MAPK1, CACNA1S, DRD1, RAF1, PPARA, MAPK3	212	198	6879	3.60535	0.000132496	2.5001e-06	1.1797e-06
KEGG_PATHWAY	hsa04014:Ras signaling pathway	22	9.48276	4.98414e-06	CHUK, PRKCB, BAD, EGF, INSR, PRKCA, ELK1, EGFR, PIK3CG, RELA, VEGFA, MAPK10, IKBKB, RASSF1, MAPK8, RASA1, KDR, AKT1, MAPK1, RAF1, BCL2L1, MAPK3	212	226	6879	3.15867	0.00115068	1.6686e-05	7.87349e-06
KEGG_PATHWAY	hsa04660:T cell receptor signaling pathway	21	9.05172	1.36777e-11	IL10, GSK3B, JUN, CHUK, FOS, MAPK14, TNF, IL2, PIK3CG, RELA, IL4, NFKBIA, IKBKB, PPP3CA, CD40LG, IFNG, CDK4, AKT1, MAPK1, RAF1, MAPK3	212	100	6879	6.8141	3.15955e-09	1.50455e-10	7.09938e-11
KEGG_PATHWAY	hsa04071:Sphingolipid signaling pathway	20	8.62069	2.99607e-09	OPRD1, ABCC1, PRKCB, NOS3, PTEN, PRKCA, MAPK14, TNF, PIK3CG, RELA, MAPK10, MAPK8, BCL2, BAX, AKT1, MAPK1, RAF1, CTSD, TP53, MAPK3	212	120	6879	5.40802	6.92092e-07	1.92248e-08	9.07143e-09
KEGG_PATHWAY	hsa04012:ErbB signaling pathway	19	8.18966	8.32631e-11	GSK3B, CDKN1A, JUN, PRKCB, BAD, EGF, PRKCA, ELK1, EGFR, PIK3CG, MAPK10, MAPK8, ERBB3, MYC, ERBB2, AKT1, MAPK1, RAF1, MAPK3	212	87	6879	7.08637	1.92338e-08	7.3976e-10	3.49064e-10
KEGG_PATHWAY	hsa04910:Insulin signaling pathway	19	8.18966	1.7513e-07	SREBF1, PTPN1, GSK3B, BAD, INSR, PYGM, SLC2A4, ELK1, PIK3CG, HK2, ACACA, MAPK10, IKBKB, MAPK8, FASN, AKT1, MAPK1, RAF1, MAPK3	212	138	6879	4.46749	4.04541e-05	8.42811e-07	3.9769e-07
KEGG_PATHWAY	hsa04022:cGMP-PKG signaling pathway	18	7.75862	5.92358e-06	OPRD1, NOS3, BAD, INSR, ADRA1D, ADRB1, ADRB2, ADRA1B, ADRA1A, ADRA2A, PPP3CA, KCNMA1, PDE3A, AKT1, MAPK1, CACNA1S, RAF1, MAPK3	212	158	6879	3.69662	0.00136741	1.92725e-05	9.09394e-06
KEGG_PATHWAY	hsa04062:Chemokine signaling pathway	18	7.75862	5.09047e-05	GSK3B, CXCL8, NCF1, CHUK, STAT1, STAT3, CXCL2, PIK3CG, RELA, NFKBIA, IKBKB, CXCL10, CXCL11, CCL2, AKT1, MAPK1, RAF1, MAPK3	212	186	6879	3.14014	0.0116904	0.000139988	6.60548e-05
KEGG_PATHWAY	hsa04115:p53 signaling pathway	17	7.32759	9.82148e-11	CDKN1A, CDKN2A, IGFBP3, SERPINE1, PTEN, CASP9, CCNB1, CASP8, CCND1, CDK4, CHEK2, CASP3, CHEK1, CDK2, CDK1, BAX, TP53	212	67	6879	8.2331	2.26876e-08	8.40282e-10	3.96497e-10
KEGG_PATHWAY	hsa04917:Prolactin signaling pathway	17	7.32759	2.51006e-10	GSK3B, STAT1, STAT3, FOS, MAPK14, ESR1, PIK3CG, RELA, ESR2, MAPK10, MAPK8, CCND1, IRF1, AKT1, MAPK1, RAF1, MAPK3	212	71	6879	7.76927	5.79823e-08	1.93274e-09	9.11987e-10
KEGG_PATHWAY	hsa04722:Neurotrophin signaling pathway	17	7.32759	6.42925e-07	GSK3B, JUN, BAD, MAPK14, PIK3CG, RELA, MAPK10, NFKBIA, IKBKB, MAPK8, BCL2, BAX, AKT1, MAPK1, RAF1, TP53, MAPK3	212	120	6879	4.59682	0.000148505	2.75029e-06	1.29776e-06
KEGG_PATHWAY	hsa04621:NOD-like receptor signaling pathway	16	6.89655	6.5205e-11	CXCL8, CHUK, MAPK14, CXCL2, TNF, RELA, MAPK10, NFKBIA, IKBKB, IL6, MAPK8, CASP8, IL1B, CCL2, MAPK1, MAPK3	212	56	6879	9.27089	1.50624e-08	6.02494e-10	2.84294e-10
KEGG_PATHWAY	hsa04370:VEGF signaling pathway	16	6.89655	2.47058e-10	PRKCB, NOS3, BAD, HSPB1, PRKCA, PTGS2, MAPK14, PIK3CG, VEGFA, CASP9, PPP3CA, KDR, AKT1, MAPK1, RAF1, MAPK3	212	61	6879	8.51098	5.70705e-08	1.93274e-09	9.11987e-10
KEGG_PATHWAY	hsa04920:Adipocytokine signaling pathway	15	6.46552	1.79758e-08	CHUK, STAT3, ADIPOQ, SLC2A4, TNF, RELA, MAPK10, RXRB, NFKBIA, IKBKB, MAPK8, RXRA, AKT1, PPARA, RXRG	212	70	6879	6.95317	4.1524e-06	9.88669e-08	4.66515e-08
KEGG_PATHWAY	hsa04921:Oxytocin signaling pathway	15	6.46552	0.000190344	CDKN1A, JUN, PRKCB, NOS3, PRKCA, FOS, PTGS2, ELK1, EGFR, PPP3CA, CCND1, MAPK1, CACNA1S, RAF1, MAPK3	212	150	6879	3.24481	0.0430209	0.000483182	0.000227995
KEGG_PATHWAY	hsa04064:NF-kappa B signaling pathway	14	6.03448	2.02884e-06	VCAM1, CXCL8, CHUK, PTGS2, TNF, RELA, ICAM1, NFKBIA, IKBKB, CD40LG, PLAU, IL1B, BCL2, BCL2L1	212	87	6879	5.22154	0.000468553	7.78989e-06	3.67575e-06
KEGG_PATHWAY	hsa04915:Estrogen signaling pathway	14	6.03448	8.86239e-06	JUN, NOS3, MMP2, FOS, OPRM1, ESR1, MMP9, EGFR, PIK3CG, ESR2, AKT1, MAPK1, RAF1, MAPK3	212	99	6879	4.58862	0.00204513	2.7665e-05	1.30541e-05
KEGG_PATHWAY	hsa04152:AMPK signaling pathway	14	6.03448	9.19269e-05	SREBF1, INSR, ADIPOQ, HMGCR, SLC2A4, SIRT1, ADRA1A, PIK3CG, ACACA, CCNA2, CCND1, FASN, AKT1, PPARG	212	123	6879	3.69328	0.0210122	0.000241308	0.000113864
KEGG_PATHWAY	hsa04662:B cell receptor signaling pathway	13	5.60345	9.58681e-07	GSK3B, JUN, CHUK, FOS, PIK3CG, RELA, NFKBIA, IKBKB, PPP3CA, AKT1, MAPK1, RAF1, MAPK3	212	69	6879	6.11341	0.000221431	4.02646e-06	1.89993e-06
KEGG_PATHWAY	hsa04912:GnRH signaling pathway	13	5.60345	1.89374e-05	JUN, PRKCB, MMP2, PRKCA, MAPK14, ELK1, EGFR, MAPK10, MAPK8, MAPK1, CACNA1S, RAF1, MAPK3	212	91	6879	4.63544	0.00436503	5.53739e-05	2.61288e-05
KEGG_PATHWAY	hsa04630:Jak-STAT signaling pathway	13	5.60345	0.00158538	IL10, STAT1, STAT3, IL2, PIK3CG, IL4, IL6, IFNG, CCND1, MYC, PIM1, AKT1, BCL2L1	212	145	6879	2.90914	0.306854	0.00366224	0.00172807
KEGG_PATHWAY	hsa04015:Rap1 signaling pathway	13	5.60345	0.0276555	PRKCB, EGF, INSR, PRKCA, MAPK14, EGFR, PIK3CG, VEGFA, KDR, AKT1, MAPK1, RAF1, MAPK3	212	210	6879	2.00869	0.998464	0.052364	0.0276555
KEGG_PATHWAY	hsa04664:Fc epsilon RI signaling pathway	12	5.17241	5.75232e-06	MAPK10, IL4, MAPK8, PRKCB, MAPK1, AKT1, PRKCA, RAF1, MAPK14, TNF, PIK3CG, MAPK3	212	68	6879	5.72614	0.00132791	1.89827e-05	8.95718e-06
KEGG_PATHWAY	hsa04622:RIG-I-like receptor signaling pathway	11	4.74138	4.72819e-05	MAPK10, NFKBIA, IKBKB, CXCL10, MAPK8, CXCL8, CASP8, CHUK, MAPK14, TNF, RELA	212	70	6879	5.09899	0.0108629	0.000131592	6.2093e-05
KEGG_PATHWAY	hsa04310:Wnt signaling pathway	11	4.74138	0.00967177	MAPK10, GSK3B, PPP3CA, JUN, MAPK8, CCND1, PRKCB, MYC, PRKCA, TP53, PPARD	212	138	6879	2.58644	0.894078	0.019948	0.00967177
KEGG_PATHWAY	hsa04150:mTOR signaling pathway	9	3.87931	0.0003512	IKBKB, PRKCB, PTEN, MAPK1, AKT1, PRKCA, TNF, PIK3CG, MAPK3	212	58	6879	5.03505	0.0779367	0.000872335	0.000411621
KEGG_PATHWAY	hsa03320:PPAR signaling pathway	9	3.87931	0.000943655	RXRB, RXRA, MMP1, ADIPOQ, OLR1, PPARG, PPARA, RXRG, PPARD	212	67	6879	4.3587	0.195945	0.00229457	0.00108272
KEGG_PATHWAY	hsa04550:Signaling pathways regulating pluripotency of stem cells	9	3.87931	0.0655352	GSK3B, MYC, STAT3, MAPK1, AKT1, RAF1, MAPK14, PIK3CG, MAPK3	212	140	6879	2.08595	1	0.115562	0.0655352

## Sheet: TOP 20 signaling Pathway.
Category	Term	Pathway	Gene Ratio	PValue	Count	Genes	List Total	Pop Hits	Pop Total	Fold Enrichment	Bonferroni	Benjamini	FDR
KEGG_PATHWAY	hsa04151	PI3K-Akt signaling pathway	0.150862	8.8922e-10	35	CHRM2, GSK3B, CDKN1A, CHRM1, PTEN, RELA, EGFR, PIK3CG, CASP9, IKBKB, RXRA, CCND1, MYC, KDR, SPP1, AKT1, MAPK1, MAPK3, CHUK, EGF, NOS3, BAD, INSR, PRKCA, IL2, VEGFA, IL4, COL1A1, IL6, CDK4, CDK2, BCL2, RAF1, TP53, BCL2L1	212	345	6879	3.29184	2.0541e-07	5.86885e-09	2.76928e-09
KEGG_PATHWAY	hsa04010	MAPK signaling pathway	0.12069	1.06217e-08	28	HSPB1, ELK1, TNF, RELA, EGFR, IKBKB, PPP3CA, MAPK8, MYC, CASP3, AKT1, MAPK1, CACNA1S, MAPK3, JUN, TGFB1, CHUK, PRKCB, EGF, PRKCA, FOS, MAPK14, MAPK10, IL1A, RASA1, IL1B, RAF1, TP53	212	253	6879	3.5911	2.45361e-06	5.98442e-08	2.82382e-08
KEGG_PATHWAY	hsa04668	TNF signaling pathway	0.116379	5.37023e-17	27	PTGS2, TNF, CXCL2, RELA, PIK3CG, ICAM1, IKBKB, MAPK8, CASP8, CASP3, CCL2, AKT1, MAPK1, MAPK3, JUN, VCAM1, CHUK, MMP3, FOS, MAPK14, SELE, MMP9, MAPK10, NFKBIA, CXCL10, IL6, IL1B	212	107	6879	8.18784	1.24052e-14	1.77218e-15	8.36222e-16
KEGG_PATHWAY	hsa04068	FoxO signaling pathway	0.107759	1.38275e-12	25	CDKN1A, PTEN, SLC2A4, EGFR, PIK3CG, IKBKB, MAPK8, CCNB1, CCND1, AKT1, MAPK1, MAPK3, IL10, TGFB1, CHUK, EGF, INSR, STAT3, MAPK14, SIRT1, MAPK10, IL6, CAT, CDK2, RAF1	212	134	6879	6.05375	3.19423e-10	2.12943e-11	1.0048e-11
KEGG_PATHWAY	hsa04066	HIF-1 signaling pathway	0.0991379	6.24867e-14	23	CDKN1A, NOS2, PRKCB, NOS3, EGF, INSR, STAT3, SERPINE1, PRKCA, HIF1A, EGFR, PIK3CG, RELA, HK2, VEGFA, IL6, IFNG, ERBB2, BCL2, AKT1, HMOX1, MAPK1, MAPK3	212	96	6879	7.77403	1.44388e-11	1.03103e-12	4.86504e-13
KEGG_PATHWAY	hsa04620	Toll-like receptor signaling pathway	0.0948276	4.9733e-12	22	JUN, CXCL8, CHUK, STAT1, FOS, MAPK14, TNF, PIK3CG, RELA, MAPK10, NFKBIA, IKBKB, CXCL10, CXCL11, IL6, MAPK8, CASP8, IL1B, SPP1, AKT1, MAPK1, MAPK3	212	106	6879	6.73451	1.14885e-09	6.46852e-11	3.05225e-11
KEGG_PATHWAY	hsa04919	Thyroid hormone signaling pathway	0.0948276	2.57892e-11	22	NCOA1, NCOA2, GSK3B, PRKCB, STAT1, BAD, DIO1, PRKCA, HIF1A, ESR1, PIK3CG, CASP9, RXRB, RXRA, CCND1, MYC, AKT1, MAPK1, RAF1, RXRG, TP53, MAPK3	212	115	6879	6.20747	5.95732e-09	2.59013e-10	1.22218e-10
KEGG_PATHWAY	hsa04020	Calcium signaling pathway	0.0948276	1.02224e-07	22	CHRM2, CHRM3, CHRM1, NOS2, PRKCB, NOS3, CHRNA7, PTGER3, CHRM5, PRKCA, ADRA1D, ADRB1, ADRB2, HTR2A, ADRA1B, ADRA1A, EGFR, PPP3CA, ERBB3, ERBB2, CACNA1S, DRD1	212	179	6879	3.98804	2.36134e-05	5.24749e-07	2.47609e-07
KEGG_PATHWAY	hsa04024	cAMP signaling pathway	0.0948276	5.73615e-07	22	CHRM2, GRIA2, JUN, CHRM1, BAD, PTGER3, ADRB1, FOS, ADRB2, PIK3CG, RELA, MAPK10, NFKBIA, MAPK8, PDE3A, AKT1, MAPK1, CACNA1S, DRD1, RAF1, PPARA, MAPK3	212	198	6879	3.60535	0.000132496	2.5001e-06	1.1797e-06
KEGG_PATHWAY	hsa04014	Ras signaling pathway	0.0948276	4.98414e-06	22	CHUK, PRKCB, BAD, EGF, INSR, PRKCA, ELK1, EGFR, PIK3CG, RELA, VEGFA, MAPK10, IKBKB, RASSF1, MAPK8, RASA1, KDR, AKT1, MAPK1, RAF1, BCL2L1, MAPK3	212	226	6879	3.15867	0.00115068	1.6686e-05	7.87349e-06
KEGG_PATHWAY	hsa04660	T cell receptor signaling pathway	0.0905172	1.36777e-11	21	IL10, GSK3B, JUN, CHUK, FOS, MAPK14, TNF, IL2, PIK3CG, RELA, IL4, NFKBIA, IKBKB, PPP3CA, CD40LG, IFNG, CDK4, AKT1, MAPK1, RAF1, MAPK3	212	100	6879	6.8141	3.15955e-09	1.50455e-10	7.09938e-11
KEGG_PATHWAY	hsa04071	Sphingolipid signaling pathway	0.0862069	2.99607e-09	20	OPRD1, ABCC1, PRKCB, NOS3, PTEN, PRKCA, MAPK14, TNF, PIK3CG, RELA, MAPK10, MAPK8, BCL2, BAX, AKT1, MAPK1, RAF1, CTSD, TP53, MAPK3	212	120	6879	5.40802	6.92092e-07	1.92248e-08	9.07143e-09
KEGG_PATHWAY	hsa04012	ErbB signaling pathway	0.0818966	8.32631e-11	19	GSK3B, CDKN1A, JUN, PRKCB, BAD, EGF, PRKCA, ELK1, EGFR, PIK3CG, MAPK10, MAPK8, ERBB3, MYC, ERBB2, AKT1, MAPK1, RAF1, MAPK3	212	87	6879	7.08637	1.92338e-08	7.3976e-10	3.49064e-10
KEGG_PATHWAY	hsa04910	Insulin signaling pathway	0.0818966	1.7513e-07	19	SREBF1, PTPN1, GSK3B, BAD, INSR, PYGM, SLC2A4, ELK1, PIK3CG, HK2, ACACA, MAPK10, IKBKB, MAPK8, FASN, AKT1, MAPK1, RAF1, MAPK3	212	138	6879	4.46749	4.04541e-05	8.42811e-07	3.9769e-07
KEGG_PATHWAY	hsa04022	cGMP-PKG signaling pathway	0.0775862	5.92358e-06	18	OPRD1, NOS3, BAD, INSR, ADRA1D, ADRB1, ADRB2, ADRA1B, ADRA1A, ADRA2A, PPP3CA, KCNMA1, PDE3A, AKT1, MAPK1, CACNA1S, RAF1, MAPK3	212	158	6879	3.69662	0.00136741	1.92725e-05	9.09394e-06
KEGG_PATHWAY	hsa04062	Chemokine signaling pathway	0.0775862	5.09047e-05	18	GSK3B, CXCL8, NCF1, CHUK, STAT1, STAT3, CXCL2, PIK3CG, RELA, NFKBIA, IKBKB, CXCL10, CXCL11, CCL2, AKT1, MAPK1, RAF1, MAPK3	212	186	6879	3.14014	0.0116904	0.000139988	6.60548e-05
KEGG_PATHWAY	hsa04115	p53 signaling pathway	0.0732759	9.82148e-11	17	CDKN1A, CDKN2A, IGFBP3, SERPINE1, PTEN, CASP9, CCNB1, CASP8, CCND1, CDK4, CHEK2, CASP3, CHEK1, CDK2, CDK1, BAX, TP53	212	67	6879	8.2331	2.26876e-08	8.40282e-10	3.96497e-10
KEGG_PATHWAY	hsa04917	Prolactin signaling pathway	0.0732759	2.51006e-10	17	GSK3B, STAT1, STAT3, FOS, MAPK14, ESR1, PIK3CG, RELA, ESR2, MAPK10, MAPK8, CCND1, IRF1, AKT1, MAPK1, RAF1, MAPK3	212	71	6879	7.76927	5.79823e-08	1.93274e-09	9.11987e-10
KEGG_PATHWAY	hsa04722	Neurotrophin signaling pathway	0.0732759	6.42925e-07	17	GSK3B, JUN, BAD, MAPK14, PIK3CG, RELA, MAPK10, NFKBIA, IKBKB, MAPK8, BCL2, BAX, AKT1, MAPK1, RAF1, TP53, MAPK3	212	120	6879	4.59682	0.000148505	2.75029e-06	1.29776e-06
KEGG_PATHWAY	hsa04621	NOD-like receptor signaling pathway	0.0689655	6.5205e-11	16	CXCL8, CHUK, MAPK14, CXCL2, TNF, RELA, MAPK10, NFKBIA, IKBKB, IL6, MAPK8, CASP8, IL1B, CCL2, MAPK1, MAPK3	212	56	6879	9.27089	1.50624e-08	6.02494e-10	2.84294e-10
